# Supplementary material for: Vibrational synchronization and its reaction pathway influence from an entropic intermediate in a dirhodium catalyzed allylic C–H activation/Cope rearrangement reaction
Source: Royal Society of Chemistry journal article supplement (doi:10.1039/d4cp00657g), 2024-01-01
Supplement: d4cp00657g1.pdf [file d4cp00657g1.pdf]

## Electronic Supplementary Information

### Vibrational Synchronization and its Reaction Pathway Influence from an Entropic Intermediate in a Dirhodium Catalyzed Allylic C-H Activation/Cope Rearrangement Reaction

Anthony J. Schaefer and Daniel H. Ess\*

Department of Chemistry and Biochemistry, Brigham Young University, Provo, Utah 84604, USA.

\*E-mail: dhe@byu.edu

## Contents

|                                                                               |      |
|-------------------------------------------------------------------------------|------|
| <b>Molecular structures and energies</b> .....                                | S2   |
| <b>s-cis TS1</b> .....                                                        | S2   |
| <b>s-trans TS1</b> .....                                                      | S3   |
| <b>s-trans TS1 (def2-TZVP)</b> .....                                          | S4   |
| <b>TS2</b> .....                                                              | S5   |
| <b>Rh<sub>2</sub>(OAc)<sub>4</sub> carbenoid</b> .....                        | S6   |
| <b>Rh<sub>2</sub>(OAc)<sub>4</sub></b> .....                                  | S7   |
| <b>1,4-cyclohexadiene</b> .....                                               | S8   |
| <b>Product 3</b> .....                                                        | S8   |
| <b>Product 4</b> .....                                                        | S9   |
| <b>Product 5</b> .....                                                        | S9   |
| <b>Charge Analysis</b> .....                                                  | S11  |
| <b>Charges on molecular fragments during dynamic IRC of s-trans TS1</b> ..... | S11  |
| <b>Initial Conditions for Trajectories</b> .....                              | S12  |
| <b>s-trans TS1</b> .....                                                      | S12  |
| <b>random sampling</b> .....                                                  | S12  |
| <b>Dynamic IRC</b> .....                                                      | S97  |
| <b>s-cis TS1</b> .....                                                        | S99  |
| <b>random sampling</b> .....                                                  | S99  |
| <b>Dynamic IRC</b> .....                                                      | S178 |

# Molecular structures and energies

Free energies reported are  $G_{RRHO}$ . Example route in Gaussian input:

```
#n M06/def2SVP freq=HPModes Integral=(grid=SuperFineGrid)
```

Relative energies in kcal/mol for stationary points at the M06/def2-TZVP//M06/def2-SVP and M06/def2-SVP level. Relative  $G_{quasi-RRHO}$  is in parentheses.

| structure                                                                    | M06/def2-TZVP//def2-SVP | M06/def2-SVP  |
|------------------------------------------------------------------------------|-------------------------|---------------|
| Reactants ( $Rh_2(OAc)_4$ carbenoid <b>1</b> + 1,4-cyclohexadiene <b>2</b> ) | 0 (0)                   | 0 (0)         |
| s-cis <b>TS1</b>                                                             | -0.2 (13.3)             | -5.0 (8.6)    |
| s-trans <b>TS1</b>                                                           | 1.3 (13.8)              | -3.5 (9.1)    |
| <b>TS2</b>                                                                   | -15.3 (3.4)             | -22.4 (-3.8)  |
| Product <b>3</b> + $Rh_2Ac_4$                                                | -26.3 (-23.8)           | -27.6 (-26.0) |
| Product <b>4</b> + $Rh_2Ac_4$                                                | -26.5 (-24.9)           | -28.1 (-26.6) |
| Product <b>5</b> + $Rh_2Ac_4$                                                | -24.7 (-21.8)           | -26.9 (-24.0) |

## s-cis TS1

electronic energy = -1941.86774729  $E_h$

free energy at 298.15 K = -1941.434531  $E_h$

imaginary frequency = 719.4275i  $cm^{-1}$

structure:

```
Rh  -0.81972  0.04218  -0.13133
C   0.85561  1.19975  -0.68345
C   0.43678  2.40132  -1.45247
O  -0.09190  3.36722  -0.68883
C  -0.72869  4.41550  -1.39187
H  -0.03302  4.91722  -2.08270
H  -1.09268  5.12714  -0.64051
H  -1.57365  4.01889  -1.97680
O   0.52853  2.47101  -2.65269
C   2.11866  0.65921  -1.07986
C   2.66684  -0.44037  -0.48759
H   2.03694  -1.00814  0.20672
H   2.68245  1.20615  -1.85055
O  -1.28584  1.19452  1.51653
C  -2.37278  0.97706  2.13719
O  -3.20405  0.07426  1.88091
Rh  -2.83946  -1.27137  0.35270
O  -1.68724  -2.40130  1.64431
C  -0.45972  -2.17406  1.73747
O   0.18267  -1.26175  1.12987
O  -3.82950  -0.04498  -0.97256
C  -3.22595  0.92297  -1.49516
O  -2.00874  1.23160  -1.31504
O  -2.29244  -2.49080  -1.21533
C  -1.28158  -2.20262  -1.90418
O  -0.49067  -1.23099  -1.70714
C   1.64042  2.22215  1.57935
C   2.70963  3.07191  1.05753
C   3.34226  0.64536  2.35409
C   2.05322  1.03966  2.31924
H   1.26733  0.42262  2.76593
H   2.42593  4.01562  0.58080
H   1.04169  1.66769  0.58434
H   0.72277  2.72088  1.92189
C   4.00050  2.70003  1.11328
```

|   |          |          |          |
|---|----------|----------|----------|
| H | 4.77128  | 3.35679  | 0.69475  |
| C | 4.45342  | 1.44336  | 1.77085  |
| H | 5.20298  | 1.67495  | 2.55628  |
| H | 5.03197  | 0.81741  | 1.05442  |
| C | 4.01417  | -0.94158 | -0.69534 |
| C | 4.40013  | -2.12641 | -0.04387 |
| C | 4.97062  | -0.27450 | -1.48288 |
| C | 5.68558  | -2.63579 | -0.18217 |
| H | 3.66395  | -2.64514 | 0.58040  |
| C | 6.25436  | -0.78635 | -1.62488 |
| H | 4.70379  | 0.66162  | -1.98292 |
| C | 6.61711  | -1.96752 | -0.97599 |
| H | 5.96537  | -3.55997 | 0.33133  |
| H | 6.98405  | -0.25696 | -2.24419 |
| H | 7.63030  | -2.36439 | -1.08592 |
| C | -2.68701 | 1.91877  | 3.26357  |
| H | -3.43519 | 1.48270  | 3.93745  |
| H | -1.77187 | 2.17827  | 3.81439  |
| H | -3.09434 | 2.85117  | 2.84212  |
| C | 0.35234  | -3.07419 | 2.62428  |
| H | -0.26199 | -3.45698 | 3.44983  |
| H | 0.69488  | -3.93755 | 2.03173  |
| H | 1.23919  | -2.54948 | 3.00802  |
| C | -0.97921 | -3.06514 | -3.09401 |
| H | -1.49184 | -4.03195 | -3.01267 |
| H | -1.33642 | -2.55103 | -3.99993 |
| H | 0.10534  | -3.20229 | -3.20164 |
| C | -4.00469 | 1.83035  | -2.40199 |
| H | -4.25537 | 2.75255  | -1.85403 |
| H | -3.39156 | 2.11414  | -3.26912 |
| H | -4.93679 | 1.34955  | -2.72448 |
| H | 3.60880  | -0.28139 | 2.87661  |

## s-trans TS1

electronic energy = -1941.86533530 E<sub>h</sub>

free energy at 298.15 K = -1941.434986 E<sub>h</sub>

imaginary frequency = 816.4095i cm<sup>-1</sup>

structure:

|    |          |          |          |
|----|----------|----------|----------|
| Rh | -0.90223 | 0.02912  | -0.12105 |
| C  | 0.97054  | 0.86654  | -0.42985 |
| C  | 0.90449  | 2.03555  | -1.33780 |
| O  | 0.48534  | 3.15017  | -0.71572 |
| C  | 0.10199  | 4.21258  | -1.56685 |
| H  | 0.93109  | 4.52307  | -2.22178 |
| H  | -0.19868 | 5.04528  | -0.91900 |
| H  | -0.74452 | 3.90145  | -2.19910 |
| O  | 1.11776  | 1.97700  | -2.52380 |
| C  | 2.09651  | -0.02000 | -0.45905 |
| C  | 3.28823  | 0.26566  | -1.04689 |
| H  | 3.36959  | 1.19142  | -1.63073 |
| H  | 1.97261  | -0.94638 | 0.11698  |
| O  | -1.31905 | 1.17047  | 1.54432  |
| C  | -2.44075 | 1.03523  | 2.12672  |
| O  | -3.35329 | 0.24250  | 1.79800  |
| Rh | -3.09825 | -1.02607 | 0.18119  |
| O  | -2.14003 | -2.37832 | 1.42186  |
| C  | -0.90293 | -2.30153 | 1.60459  |
| O  | -0.12075 | -1.43269 | 1.10614  |
| O  | -3.84437 | 0.42495  | -1.08243 |
| C  | -3.08158 | 1.30817  | -1.54273 |
| O  | -1.83753 | 1.41965  | -1.31702 |
| O  | -2.64279 | -2.19229 | -1.45566 |
| C  | -1.55119 | -2.02610 | -2.05470 |
| O  | -0.63818 | -1.20396 | -1.73826 |
| C  | 1.62171  | 1.94239  | 1.83379  |
| C  | 1.76707  | 0.78358  | 2.71238  |
| C  | 2.96618  | 0.21598  | 2.93073  |
| C  | 4.23181  | 0.75004  | 2.35755  |

|   |          |          |          |
|---|----------|----------|----------|
| C | 4.05092  | 1.99308  | 1.56166  |
| C | 2.84816  | 2.56984  | 1.36808  |
| H | 2.76482  | 3.50179  | 0.80031  |
| H | 4.95294  | 2.47184  | 1.16293  |
| H | 4.72684  | -0.02740 | 1.73153  |
| H | 4.97413  | 0.92400  | 3.16383  |
| H | 3.03716  | -0.66829 | 3.57392  |
| H | 0.85357  | 0.35298  | 3.13398  |
| H | 1.03561  | 1.40591  | 0.79905  |
| H | 0.76121  | 2.59894  | 2.02368  |
| C | 4.49172  | -0.54709 | -0.98643 |
| C | 5.66911  | -0.06134 | -1.58082 |
| C | 4.54715  | -1.78129 | -0.31170 |
| C | 6.89597  | -1.99707 | -0.83395 |
| C | 5.73581  | -2.49647 | -0.23988 |
| C | 6.85899  | -0.77586 | -1.50484 |
| H | 5.63594  | 0.89692  | -2.11016 |
| H | 7.76384  | -0.38015 | -1.97458 |
| H | 7.82966  | -2.56345 | -0.77479 |
| H | 5.75987  | -3.45687 | 0.28290  |
| H | 3.64380  | -2.18617 | 0.15468  |
| C | -0.26017 | -3.34752 | 2.46975  |
| C | -3.67608 | 2.35534  | -2.43942 |
| C | -1.29117 | -2.85281 | -3.27940 |
| C | -2.68691 | 1.94019  | 3.29937  |
| H | 0.60981  | -2.93355 | 2.99842  |
| H | 0.09499  | -4.16832 | 1.82675  |
| H | -0.98854 | -3.76103 | 3.17920  |
| H | -3.08373 | 2.43084  | -3.36325 |
| H | -3.62350 | 3.33375  | -1.93698 |
| H | -4.72186 | 2.12190  | -2.67429 |
| H | -1.44314 | -2.22199 | -4.16894 |
| H | -1.97899 | -3.70640 | -3.32575 |
| H | -0.24562 | -3.18996 | -3.29536 |
| H | -3.05948 | 2.90764  | 2.92745  |
| H | -1.75201 | 2.13086  | 3.84553  |
| H | -3.44652 | 1.51154  | 3.96554  |

## s-trans TS1 (def2-TZVP)

electronic energy = -1943.83178867 E<sub>h</sub>

free energy at 298.15 K = -1943.400320 E<sub>h</sub>

imaginary frequency = 822.6666i cm<sup>-1</sup>

RMSD to s-trans TS1 optimized with M06/def2-SVP = 0.079

RMSD to s-trans TS1 excluding H atoms = 0.047

MAD of normal mode frequencies = 9.4 cm<sup>-1</sup>

average % difference in normal mode frequencies = 1.2%

RMSD of normal mode frequencies = 14.5 cm<sup>-1</sup>

structure:

|    |          |          |          |
|----|----------|----------|----------|
| Rh | -0.89821 | 0.02941  | -0.11963 |
| C  | 0.98430  | 0.86890  | -0.43943 |
| C  | 0.92397  | 1.99984  | -1.38998 |
| O  | 0.49021  | 3.13284  | -0.81573 |
| C  | 0.12741  | 4.16141  | -1.72176 |
| H  | 0.97311  | 4.45777  | -2.34485 |
| H  | -0.20420 | 5.00142  | -1.11529 |
| H  | -0.68347 | 3.82034  | -2.36836 |
| O  | 1.14705  | 1.89388  | -2.56668 |
| C  | 2.10647  | -0.01382 | -0.43439 |
| C  | 3.28987  | 0.23713  | -1.03218 |
| H  | 3.37749  | 1.13268  | -1.64287 |
| H  | 1.98057  | -0.91186 | 0.16578  |
| O  | -1.35666 | 1.24381  | 1.47369  |
| C  | -2.48058 | 1.11210  | 2.04516  |
| O  | -3.37957 | 0.29733  | 1.74771  |
| Rh | -3.08664 | -1.02473 | 0.18936  |
| O  | -2.15034 | -2.32311 | 1.49128  |

|   |          |          |          |
|---|----------|----------|----------|
| C | -0.92317 | -2.21631 | 1.69909  |
| O | -0.13592 | -1.36306 | 1.19003  |
| O | -3.82744 | 0.36290  | -1.13536 |
| C | -3.05746 | 1.22049  | -1.62258 |
| O | -1.81896 | 1.34704  | -1.39557 |
| O | -2.60941 | -2.25026 | -1.38679 |
| C | -1.50412 | -2.10819 | -1.95948 |
| O | -0.59689 | -1.27708 | -1.66588 |
| C | 1.61199  | 2.02239  | 1.79680  |
| C | 1.74025  | 0.90649  | 2.72249  |
| C | 2.92219  | 0.34119  | 2.97303  |
| C | 4.19357  | 0.83211  | 2.38555  |
| C | 4.03055  | 2.04677  | 1.55086  |
| C | 2.84339  | 2.61957  | 1.32513  |
| H | 2.77519  | 3.52313  | 0.72992  |
| H | 4.93227  | 2.49894  | 1.14941  |
| H | 4.66754  | 0.03286  | 1.78918  |
| H | 4.92810  | 1.02334  | 3.18121  |
| H | 2.98089  | -0.50575 | 3.64933  |
| H | 0.82962  | 0.50923  | 3.15662  |
| H | 1.03989  | 1.43508  | 0.76800  |
| H | 0.76374  | 2.68833  | 1.95004  |
| C | 4.48068  | -0.58310 | -0.95736 |
| C | 5.63614  | -0.15252 | -1.61391 |
| C | 4.54518  | -1.77016 | -0.21907 |
| C | 6.85495  | -2.05116 | -0.81044 |
| C | 5.71800  | -2.49426 | -0.15042 |
| C | 6.81054  | -0.87617 | -1.54231 |
| H | 5.59636  | 0.76587  | -2.19075 |
| H | 7.69433  | -0.52512 | -2.06178 |
| H | 7.77328  | -2.62360 | -0.75458 |
| H | 5.74823  | -3.41492 | 0.42051  |
| H | 3.66340  | -2.13072 | 0.29893  |
| C | -0.28737 | -3.20310 | 2.63372  |
| C | -3.64260 | 2.22673  | -2.56838 |
| C | -1.20676 | -3.00035 | -3.12695 |
| C | -2.74219 | 2.05652  | 3.18089  |
| H | 0.45850  | -2.70723 | 3.25545  |
| H | 0.22678  | -3.96535 | 2.04486  |
| H | -1.03986 | -3.68839 | 3.25138  |
| H | -3.02412 | 2.29445  | -3.46378 |
| H | -3.63742 | 3.20881  | -2.09145 |
| H | -4.66378 | 1.96160  | -2.83216 |
| H | -1.17656 | -2.39686 | -4.03550 |
| H | -1.96809 | -3.77042 | -3.22741 |
| H | -0.22209 | -3.45198 | -3.00715 |
| H | -3.04984 | 3.02110  | 2.77226  |
| H | -1.83104 | 2.21785  | 3.75784  |
| H | -3.53823 | 1.67953  | 3.81930  |

## TS2

electronic energy = -1941.895563 E<sub>h</sub>

free energy at 298.15 K = -1941.453655 E<sub>h</sub>

imaginary frequency = 471.0491i cm<sup>-1</sup>

structure:

|    |          |          |          |
|----|----------|----------|----------|
| Rh | 0.56378  | -0.04285 | -0.09839 |
| C  | -1.61946 | -1.86086 | -0.72392 |
| C  | -1.14502 | -3.08383 | -0.01148 |
| O  | -1.24014 | -2.96536 | 1.31649  |
| C  | -0.73049 | -4.04412 | 2.06949  |
| H  | -1.21512 | -4.99271 | 1.78914  |
| H  | -0.92533 | -3.81644 | 3.12472  |
| H  | 0.35404  | -4.14482 | 1.90317  |
| O  | -0.79595 | -4.09275 | -0.57147 |
| C  | -1.77098 | -0.61785 | -0.05168 |
| C  | -2.37121 | 0.46820  | -0.76601 |
| H  | -2.00885 | 0.57549  | -1.80025 |
| H  | -1.92311 | -0.67531 | 1.03346  |

|    |          |          |          |
|----|----------|----------|----------|
| O  | 0.46985  | 0.23642  | 1.93769  |
| C  | 1.54813  | 0.41378  | 2.57832  |
| O  | 2.69597  | 0.53554  | 2.07550  |
| Rh | 2.89191  | 0.59246  | 0.02884  |
| O  | 2.28290  | 2.55219  | 0.04984  |
| C  | 1.07746  | 2.80707  | -0.21123 |
| O  | 0.17172  | 1.94922  | -0.42150 |
| O  | 3.36544  | -1.40846 | -0.00685 |
| C  | 2.43877  | -2.25139 | 0.11605  |
| O  | 1.20653  | -1.97840 | 0.21164  |
| O  | 2.89182  | 0.59344  | -2.02966 |
| C  | 1.90075  | 0.12876  | -2.65149 |
| O  | 0.81567  | -0.26717 | -2.12997 |
| C  | -3.47127 | -2.45073 | -1.15848 |
| C  | -4.13436 | -2.61638 | 0.14984  |
| C  | -4.81417 | -1.60959 | 0.71095  |
| C  | -4.95732 | -0.27457 | 0.05722  |
| C  | -4.17066 | -0.14818 | -1.22914 |
| C  | -3.83430 | -1.32672 | -1.91620 |
| H  | -3.53420 | -1.27108 | -2.96926 |
| H  | -4.45710 | 0.71225  | -1.84849 |
| H  | -4.67867 | 0.53455  | 0.75966  |
| H  | -6.02947 | -0.08479 | -0.15459 |
| H  | -5.31845 | -1.75901 | 1.67176  |
| H  | -4.04772 | -3.58357 | 0.65542  |
| H  | -1.24014 | -1.83987 | -1.75351 |
| H  | -3.19632 | -3.36839 | -1.69318 |
| C  | 0.65695  | 4.24289  | -0.29172 |
| C  | 2.81262  | -3.70130 | 0.18349  |
| C  | 2.02406  | -0.00069 | -4.14001 |
| C  | 1.42776  | 0.48132  | 4.07169  |
| H  | 3.73014  | -3.88636 | -0.39066 |
| H  | 1.98357  | -4.32471 | -0.18075 |
| H  | 3.01755  | -3.96663 | 1.23336  |
| H  | 2.40698  | 0.64167  | 4.53892  |
| H  | 0.97907  | -0.45139 | 4.44471  |
| H  | 0.74403  | 1.29901  | 4.34438  |
| H  | 2.71317  | 0.75755  | -4.53410 |
| H  | 1.04067  | 0.07376  | -4.62216 |
| H  | 2.44355  | -0.99245 | -4.37132 |
| H  | -0.23014 | 4.39824  | 0.34232  |
| H  | 0.35329  | 4.47110  | -1.32521 |
| H  | 1.47331  | 4.91136  | 0.00836  |
| C  | -2.62030 | 1.78459  | -0.13005 |
| C  | -2.56115 | 1.97546  | 1.25568  |
| C  | -2.93146 | 2.88422  | -0.93998 |
| C  | -3.12106 | 4.31382  | 0.99251  |
| C  | -3.18316 | 4.13579  | -0.38938 |
| C  | -2.80451 | 3.22995  | 1.80963  |
| H  | -2.28261 | 1.14425  | 1.91019  |
| H  | -2.74254 | 3.36215  | 2.89390  |
| H  | -3.31668 | 5.29656  | 1.43134  |
| H  | -3.42272 | 4.98064  | -1.04191 |
| H  | -2.96078 | 2.75158  | -2.02800 |

## Rh<sub>2</sub>(OAc)<sub>4</sub> carbenoid

electronic energy = -1708.80474982 E<sub>h</sub>

free energy at 298.15 K = -1708.486528 E<sub>h</sub>

All vibrational modes have real frequencies.

structure:

|    |          |         |          |
|----|----------|---------|----------|
| Rh | 0.49419  | 0.09785 | -0.01489 |
| C  | -1.28313 | 0.93040 | -0.03919 |
| C  | -1.30646 | 2.38780 | 0.20633  |
| O  | -0.91944 | 3.08349 | -0.85920 |
| C  | -0.68819 | 4.46353 | -0.64126 |
| H  | -1.59563 | 4.97031 | -0.27771 |
| H  | -0.38001 | 4.88715 | -1.60443 |
| H  | 0.10989  | 4.59857 | 0.10583  |

|    |          |          |          |
|----|----------|----------|----------|
| O  | -1.59992 | 2.86624  | 1.27451  |
| C  | -2.47189 | 0.18211  | -0.14332 |
| C  | -3.71376 | 0.73038  | 0.04260  |
| H  | -3.76993 | 1.80011  | 0.28576  |
| H  | -2.35415 | -0.88884 | -0.34778 |
| O  | 0.91439  | 0.55963  | -1.97253 |
| C  | 2.03175  | 0.24014  | -2.48423 |
| O  | 2.96440  | -0.36694 | -1.90611 |
| Rh | 2.72404  | -0.94259 | 0.05519  |
| O  | 1.79577  | -2.68051 | -0.57368 |
| C  | 0.55787  | -2.70600 | -0.75784 |
| O  | -0.24616 | -1.73044 | -0.60822 |
| O  | 3.41907  | 0.90277  | 0.67902  |
| C  | 2.63244  | 1.87057  | 0.79858  |
| O  | 1.37951  | 1.85258  | 0.58196  |
| O  | 2.33036  | -1.44276 | 2.01338  |
| C  | 1.23487  | -1.11196 | 2.52556  |
| O  | 0.29514  | -0.48579 | 1.94305  |
| C  | -4.98137 | 0.04056  | -0.00627 |
| C  | -6.15889 | 0.77077  | 0.24138  |
| C  | -5.08973 | -1.33372 | -0.29811 |
| C  | -7.40239 | 0.15436  | 0.19769  |
| H  | -6.08073 | 1.83822  | 0.47165  |
| C  | -6.33220 | -1.94660 | -0.34195 |
| H  | -4.18781 | -1.92067 | -0.49104 |
| C  | -7.49086 | -1.20576 | -0.09450 |
| H  | -8.30812 | 0.73458  | 0.39279  |
| H  | -6.40468 | -3.01342 | -0.56990 |
| H  | -8.46842 | -1.69487 | -0.12935 |
| C  | 2.22278  | 0.63543  | -3.91846 |
| H  | 3.22506  | 0.36001  | -4.26861 |
| H  | 1.46001  | 0.13901  | -4.53672 |
| H  | 2.06604  | 1.71879  | -4.02483 |
| C  | -0.06826 | -3.99899 | -1.19220 |
| H  | -0.64078 | -3.83945 | -2.11777 |
| H  | 0.69687  | -4.76895 | -1.34894 |
| H  | -0.78059 | -4.33468 | -0.42342 |
| C  | 0.98235  | -1.46832 | 3.95988  |
| H  | 0.03839  | -2.02655 | 4.04137  |
| H  | 1.81177  | -2.05994 | 4.36613  |
| H  | 0.85974  | -0.54440 | 4.54468  |
| C  | 3.19762  | 3.19622  | 1.21611  |
| H  | 3.20037  | 3.87273  | 0.34714  |
| H  | 2.55752  | 3.65165  | 1.98512  |
| H  | 4.22461  | 3.08214  | 1.58443  |

## Rh<sub>2</sub>(OAc)<sub>4</sub>

electronic energy = -1134.023664 E<sub>h</sub>

free energy at 298.15 K = -1133.861584 E<sub>h</sub>

All vibrational modes have real frequencies.

structure:

|    |          |          |          |
|----|----------|----------|----------|
| Rh | 0.00007  | -0.00757 | 1.18992  |
| O  | -1.44659 | 1.43946  | 1.12281  |
| C  | -1.85307 | 1.85251  | -0.00000 |
| O  | -1.44695 | 1.43910  | -1.12282 |
| Rh | -0.00010 | -0.00773 | -1.18999 |
| O  | -1.44616 | -1.45369 | -1.12261 |
| C  | -1.85949 | -1.85978 | 0.00030  |
| O  | -1.44617 | -1.45336 | 1.12308  |
| O  | 1.44841  | 1.43745  | -1.12321 |
| C  | 1.85545  | 1.85011  | -0.00049 |
| O  | 1.44877  | 1.43742  | 1.12242  |
| O  | 1.44431  | -1.45535 | -1.12289 |
| C  | 1.85710  | -1.86216 | -0.00006 |
| O  | 1.44429  | -1.45539 | 1.12279  |
| C  | -2.87707 | 2.94407  | -0.00006 |
| H  | -3.49511 | 2.89204  | 0.90557  |
| H  | -2.35567 | 3.91415  | -0.00135 |

|   |          |          |          |
|---|----------|----------|----------|
| H | -3.49651 | 2.89054  | -0.90465 |
| C | -2.95120 | -2.88337 | 0.00036  |
| H | -2.89726 | -3.50333 | -0.90382 |
| H | -2.89950 | -3.50101 | 0.90625  |
| H | -3.92098 | -2.36144 | -0.00163 |
| C | 2.94747  | -2.88717 | -0.00005 |
| H | 2.89423  | -3.50553 | -0.90536 |
| H | 3.91795  | -2.36652 | 0.00064  |
| H | 2.89344  | -3.50629 | 0.90470  |
| C | 2.88098  | 2.94025  | 0.00019  |
| H | 3.48777  | 2.89928  | -0.91348 |
| H | 2.36111  | 3.91090  | 0.02215  |
| H | 3.51141  | 2.87399  | 0.89638  |

## 1,4-cyclohexadiene

electronic energy = -233.05508603 E<sub>h</sub>

free energy at 298.15 K = -232.962453 E<sub>h</sub>

All vibrational modes have real frequencies.

structure:

|   |          |          |          |
|---|----------|----------|----------|
| C | 1.49394  | -0.00007 | 0.00003  |
| C | 0.66769  | 1.24649  | 0.00001  |
| C | -0.66768 | -1.24650 | -0.00002 |
| C | 0.66753  | -1.24656 | -0.00001 |
| H | 1.20421  | -2.20258 | 0.00000  |
| H | 1.20438  | 2.20250  | -0.00005 |
| H | 2.18037  | -0.00019 | 0.87133  |
| H | 2.18032  | -0.00011 | -0.87136 |
| C | -0.66753 | 1.24656  | 0.00000  |
| H | -1.20419 | 2.20259  | -0.00007 |
| C | -1.49394 | 0.00009  | 0.00003  |
| H | -2.18033 | 0.00017  | -0.87134 |
| H | -2.18039 | 0.00010  | 0.87134  |
| H | -1.20446 | -2.20247 | -0.00003 |

## Product 3

electronic energy = -807.880212 E<sub>h</sub>

free energy at 298.15 K = -807.620980 E<sub>h</sub>

All vibrational modes have real frequencies.

structure:

|   |          |          |          |
|---|----------|----------|----------|
| C | 1.57018  | -0.78893 | -0.72075 |
| C | 2.74808  | -1.25381 | 0.03298  |
| O | 3.74837  | -1.59586 | -0.79761 |
| C | 4.93331  | -2.05167 | -0.17852 |
| H | 4.74385  | -2.95067 | 0.42927  |
| H | 5.35744  | -1.28081 | 0.48448  |
| H | 5.64264  | -2.28574 | -0.98197 |
| O | 2.83739  | -1.32268 | 1.23411  |
| C | 0.46057  | -0.42012 | -0.07214 |
| C | -0.74322 | 0.16537  | -0.72550 |
| H | -0.63043 | 0.03157  | -1.81959 |
| H | 0.48221  | -0.50555 | 1.02299  |
| C | 1.42882  | 2.78981  | -0.60771 |
| C | 1.57852  | 2.60048  | 0.83126  |
| C | -0.80879 | 1.71932  | -0.50589 |
| C | 0.31056  | 2.39851  | -1.24178 |
| H | 0.22112  | 2.50465  | -2.32937 |
| H | 2.56337  | 2.74057  | 1.28713  |
| H | 1.65416  | -0.73367 | -1.81198 |
| H | 2.25293  | 3.23909  | -1.17119 |
| C | 0.51844  | 2.26081  | 1.58216  |
| H | 0.62348  | 2.13063  | 2.66446  |
| C | -0.84166 | 2.13350  | 0.96631  |
| H | -1.34410 | 3.11967  | 1.04542  |
| H | -1.48230 | 1.44257  | 1.54271  |



|   |          |          |          |
|---|----------|----------|----------|
| C | -2.05251 | -0.48219 | -0.32506 |
| C | -3.13699 | -0.39870 | -1.20768 |
| C | -2.24697 | -1.13406 | 0.89678  |
| C | -4.37653 | -0.93847 | -0.88174 |
| H | -2.99894 | 0.09792  | -2.17576 |
| C | -3.48892 | -1.67579 | 1.22794  |
| H | -1.42033 | -1.23343 | 1.60644  |
| C | -4.55801 | -1.57979 | 0.34274  |
| H | -5.20603 | -0.86363 | -1.59109 |
| H | -3.61659 | -2.18271 | 2.18894  |
| H | -5.53005 | -2.00853 | 0.60254  |
| H | -1.76780 | 2.02084  | -0.96574 |

## Product 4

electronic energy = -807.880977 E<sub>h</sub>

free energy at 298.15 K = -807.623211 E<sub>h</sub>

All vibrational modes have real frequencies.

structure:

|   |          |          |          |
|---|----------|----------|----------|
| C | -1.56399 | 0.56802  | -0.65775 |
| C | -1.73915 | 1.87250  | 0.08133  |
| O | -1.33564 | 2.90580  | -0.67040 |
| C | -1.38373 | 4.17842  | -0.05174 |
| H | -2.40871 | 4.42795  | 0.26321  |
| H | -1.02927 | 4.90460  | -0.79302 |
| H | -0.73802 | 4.20511  | 0.84100  |
| O | -2.17076 | 2.00188  | 1.19692  |
| C | -0.13755 | 0.10182  | -0.65445 |
| C | 0.91610  | 0.72603  | -0.11436 |
| H | 0.78426  | 1.72397  | 0.32772  |
| H | 0.00161  | -0.88109 | -1.12627 |
| C | -2.50213 | -0.54219 | -0.11172 |
| C | -2.66300 | -1.62647 | -1.13564 |
| C | -2.34971 | -2.90738 | -0.92593 |
| C | -1.81518 | -3.41978 | 0.37149  |
| C | -1.71659 | -2.35834 | 1.41904  |
| C | -2.02989 | -1.07762 | 1.20957  |
| H | -1.93566 | -0.34566 | 2.01834  |
| H | -1.36990 | -2.66755 | 2.41197  |
| H | -0.82414 | -3.89339 | 0.21186  |
| H | -2.44570 | -4.25664 | 0.73412  |
| H | -2.49599 | -3.63470 | -1.73318 |
| H | -3.05648 | -1.32040 | -2.11386 |
| H | -1.85458 | 0.76695  | -1.70965 |
| H | -3.48677 | -0.05240 | 0.04000  |
| C | 2.28619  | 0.20664  | -0.06246 |
| C | 3.34581  | 1.08673  | 0.19960  |
| C | 2.58698  | -1.15134 | -0.25339 |
| C | 4.94522  | -0.71129 | 0.03580  |
| C | 3.90033  | -1.60287 | -0.20940 |
| C | 4.66173  | 0.63624  | 0.24419  |
| H | 3.12538  | 2.14714  | 0.36426  |
| H | 5.47219  | 1.34293  | 0.44551  |
| H | 5.97770  | -1.07022 | 0.07397  |
| H | 4.11254  | -2.66597 | -0.35707 |
| H | 1.77403  | -1.86655 | -0.41616 |

## Product 5

electronic energy = -807.879023 E<sub>h</sub>

free energy at 298.15 K = -807.619189 E<sub>h</sub>

All vibrational modes have real frequencies.

structure:

|   |          |          |         |
|---|----------|----------|---------|
| C | -1.62650 | -0.56792 | 1.23613 |
| C | -2.45839 | -1.25916 | 0.23389 |
| O | -3.63017 | -1.62466 | 0.78426 |

|   |          |          |          |
|---|----------|----------|----------|
| C | -4.52849 | -2.30440 | -0.06773 |
| H | -5.42401 | -2.52471 | 0.52622  |
| H | -4.08774 | -3.24084 | -0.44484 |
| H | -4.79731 | -1.68451 | -0.93780 |
| O | -2.18636 | -1.49790 | -0.91975 |
| C | -0.38660 | -0.09349 | 1.03741  |
| C | 0.40416  | -0.12197 | -0.22835 |
| H | -0.08552 | -0.83127 | -0.91501 |
| H | 0.08142  | 0.39709  | 1.90110  |
| C | -1.81081 | 2.43664  | -0.74672 |
| C | -1.29954 | 3.13680  | 0.42742  |
| C | 0.01217  | 3.11201  | 0.71427  |
| C | 0.97427  | 2.42924  | -0.20874 |
| C | 0.36092  | 1.25874  | -0.97966 |
| C | -1.04029 | 1.56647  | -1.42124 |
| H | -1.44993 | 0.99258  | -2.25950 |
| H | 0.98254  | 1.08516  | -1.87746 |
| H | 1.88633  | 2.10451  | 0.32204  |
| H | 1.32808  | 3.18292  | -0.94279 |
| H | 0.40292  | 3.65050  | 1.58464  |
| H | -2.00070 | 3.68331  | 1.06610  |
| H | -2.09280 | -0.45916 | 2.21997  |
| H | -2.84668 | 2.60960  | -1.05606 |
| C | 1.83648  | -0.57813 | -0.04420 |
| C | 2.46214  | -1.23578 | -1.11123 |
| C | 2.58683  | -0.34879 | 1.11416  |
| C | 4.52524  | -1.40457 | 0.12804  |
| C | 3.91767  | -0.75702 | 1.19940  |
| C | 3.78957  | -1.64354 | -1.03154 |
| H | 1.88527  | -1.43456 | -2.02211 |
| H | 4.25168  | -2.15878 | -1.87885 |
| H | 5.56801  | -1.72722 | 0.19726  |
| H | 4.48236  | -0.56781 | 2.11721  |
| H | 2.13528  | 0.15291  | 1.97576  |

# Charge Analysis

## Charges on molecular fragments during dynamic IRC of *s*-trans TS1

Partial atomic charges were calculated during the dynamic IRC to characterize the charge transfer over the reaction coordinate. Due to the significant degree of delocalization, we found it best to sum charges for the two key fragments: the 1,4-cyclohexadiene (minus the H that is transferred to the carbenoid), and the  $\text{Rh}_2(\text{OAc})_4$  carbenoid, including the H that it receives from the diene.

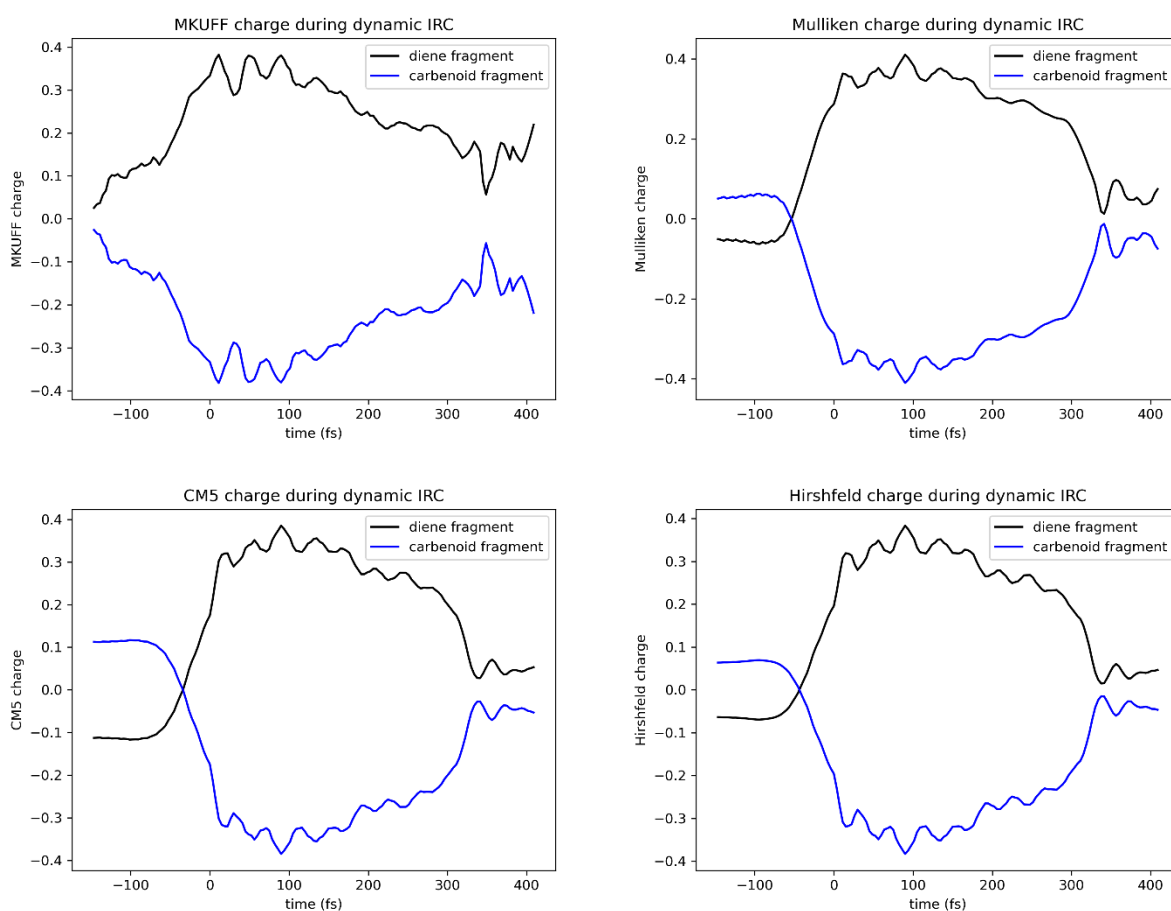

# Initial Conditions for Trajectories

Atom positions are from the structures provided above.

Masses used for each element for all trajectories:

H: 1.007830  
C: 12.000000  
O: 15.994910  
Rh: 102.904800

velocities are given in m/s

## s-trans TS1

### random sampling

initial velocities for 50 trajectories starting from s-trans TS1 using completely random sampling

trajectory 1

| atom | VX            | VY            | VZ            |
|------|---------------|---------------|---------------|
| 1    | -2.884958e+02 | 3.245771e+02  | -4.167691e+00 |
| 2    | 1.283321e+03  | -3.215914e+02 | 6.353782e+02  |
| 3    | 8.226010e+01  | -7.144761e+02 | -1.288437e+03 |
| 4    | -5.943569e+02 | -4.058999e+02 | 5.228153e+02  |
| 5    | 1.552054e+03  | -5.234549e+02 | -1.085517e+03 |
| 6    | 1.247130e+03  | 2.669278e+03  | -3.053281e+03 |
| 7    | -3.596945e+03 | -3.346698e+03 | -5.116050e+03 |
| 8    | -8.567845e+03 | -9.845562e+01 | -5.140810e+03 |
| 9    | 2.354049e+02  | 9.239879e+01  | 5.768239e+02  |
| 10   | 7.437556e+02  | -1.710142e+02 | 1.001937e+03  |
| 11   | -1.585236e+03 | 3.029524e+02  | -2.788743e+02 |
| 12   | 1.372796e+03  | 5.680474e+03  | 2.246158e+03  |
| 13   | -3.839499e+03 | 9.153965e+03  | -2.844744e+03 |
| 14   | 5.257085e+02  | -1.264452e+03 | -1.241893e+02 |
| 15   | 6.868973e+02  | 5.585697e+02  | 7.606775e+02  |
| 16   | -9.678715e+02 | -1.107475e+03 | 3.004751e+02  |
| 17   | 1.462319e+01  | 6.877711e+01  | -8.056051e+01 |
| 18   | -8.580599e+02 | -5.582669e+02 | 4.814559e+02  |
| 19   | -1.589996e+02 | -7.812033e+02 | 1.690488e+03  |
| 20   | 2.149948e+02  | 6.433881e+02  | -6.332604e+02 |
| 21   | -1.007068e+03 | 8.646015e+02  | 6.823936e+02  |
| 22   | 1.331186e+03  | 6.786779e+02  | -4.460056e+02 |
| 23   | -3.896030e+02 | -1.114508e+03 | 5.783989e+01  |
| 24   | -1.539153e+03 | -6.964606e+02 | -8.786428e+02 |
| 25   | -1.705161e+02 | 3.993544e+02  | 7.752489e+02  |

|    |               |               |               |
|----|---------------|---------------|---------------|
| 26 | 8.566708e+02  | 1.376129e+03  | -1.000559e+03 |
| 27 | -1.759503e+03 | 3.196402e+01  | -2.068313e+01 |
| 28 | -1.101451e+03 | 4.921242e+02  | 1.279942e+03  |
| 29 | 8.259233e+02  | -4.243709e+02 | -1.791503e+02 |
| 30 | 5.322779e+02  | -6.325283e+02 | 7.591410e+02  |
| 31 | -1.726389e+02 | 1.545983e+03  | -4.432389e+02 |
| 32 | 2.412832e+03  | 8.694342e+02  | 1.129635e+03  |
| 33 | -2.911435e+03 | -1.102036e+04 | -1.038302e+02 |
| 34 | 7.006199e+03  | -1.737252e+03 | 2.929499e+03  |
| 35 | 1.044019e+03  | -2.899920e+03 | -9.724720e+03 |
| 36 | -8.624705e+01 | 4.133078e+03  | -5.596131e+03 |
| 37 | 7.390732e+03  | -3.279491e+03 | 3.977534e+03  |
| 38 | 6.384780e+03  | 8.823838e+02  | -1.188039e+03 |
| 39 | -1.559731e+03 | 5.810157e+02  | -3.417736e+03 |
| 40 | 2.444068e+03  | -5.246920e+03 | -7.869282e+03 |
| 41 | -1.110415e+03 | -5.022750e+02 | -3.180447e+02 |
| 42 | 1.625656e+02  | 5.073199e+02  | -5.471685e+02 |
| 43 | -1.643447e+02 | -1.992223e+02 | 3.170180e+02  |
| 44 | -6.673115e-01 | -5.296522e+01 | -6.071465e+02 |
| 45 | 4.468464e+02  | 1.197653e+03  | -2.675470e+02 |
| 46 | 1.835601e+03  | -8.674127e+02 | 7.871884e+02  |
| 47 | 7.381170e+03  | -4.296822e+03 | 1.921552e+03  |
| 48 | -1.522294e+03 | 6.596362e+03  | 1.829056e+03  |
| 49 | 3.240423e+03  | -1.873734e+03 | 3.487169e+03  |
| 50 | -4.290508e+03 | -9.983096e+03 | 4.228296e+03  |
| 51 | -5.424431e+02 | 5.272080e+03  | -2.251759e+03 |
| 52 | 6.654711e+02  | 7.622130e+02  | 5.614258e+02  |
| 53 | -1.273308e+03 | -2.097980e+02 | 6.251880e+02  |
| 54 | 7.680460e+01  | -1.881489e+03 | -1.001187e+03 |
| 55 | 3.700993e+02  | -1.706931e+03 | 2.627790e+02  |
| 56 | -1.306916e+03 | -5.747702e+02 | -1.878084e+03 |
| 57 | 2.371257e+03  | -3.620714e+03 | 5.956810e+03  |
| 58 | 4.292021e+03  | 6.387974e+03  | -6.898823e+03 |
| 59 | 2.735197e+02  | 3.244459e+03  | -2.374620e+03 |
| 60 | 3.678892e+03  | -6.109007e+03 | -3.672705e+03 |
| 61 | 7.880620e+03  | 7.320121e+02  | -4.489693e+03 |
| 62 | -3.410279e+03 | 3.958599e+03  | 2.057604e+03  |
| 63 | 1.576723e+03  | 7.989962e+03  | -9.145363e+02 |
| 64 | -2.240174e+03 | 5.378097e+03  | 1.273432e+03  |
| 65 | -6.477464e+03 | 5.728895e+03  | -3.180251e+03 |
| 66 | 1.862453e+03  | -3.823823e+03 | 4.689408e+03  |
| 67 | -8.057041e+02 | 3.320422e+03  | -4.832686e+03 |

trajectory 2

| atom | VX            | VY            | VZ            |
|------|---------------|---------------|---------------|
| 1    | -1.967211e+00 | -5.403307e+02 | 7.270870e+01  |
| 2    | -3.417049e+02 | -3.904246e+02 | 7.243152e+02  |
| 3    | -1.057722e+03 | -1.760926e+02 | -1.583542e+03 |
| 4    | 2.749269e+02  | -1.465321e+02 | 7.589383e+02  |
| 5    | 9.393602e+02  | 1.816139e+02  | -1.155886e+03 |
| 6    | 3.115796e+03  | -6.973000e+02 | -8.263192e+03 |
| 7    | 3.815316e+01  | 1.579716e+03  | 1.122931e+04  |
| 8    | 1.492051e+03  | -8.200517e+02 | 2.293732e+03  |
| 9    | -2.810050e+01 | 1.557886e+03  | -2.820472e+02 |
| 10   | 1.465045e+02  | 8.394471e+01  | 5.614497e+01  |
| 11   | -1.815232e+03 | -5.035084e+02 | -4.165692e+02 |
| 12   | -1.045381e+03 | 2.802837e+03  | -1.440101e+03 |
| 13   | -2.243815e+03 | 6.630744e+03  | -4.193690e+03 |
| 14   | 7.752065e+02  | 2.627304e+02  | -1.516499e+03 |
| 15   | 5.736975e+02  | -1.620878e+01 | 1.026196e+03  |
| 16   | -6.230897e+02 | 4.992623e+02  | 8.225832e+01  |
| 17   | -3.699828e+02 | -2.643615e+02 | -1.338389e+01 |
| 18   | 3.660506e+02  | 2.850107e+02  | 8.582036e+02  |
| 19   | 1.512332e+03  | 1.411995e+02  | 6.303988e+01  |
| 20   | -8.271788e+02 | -7.582300e+02 | -3.813002e+02 |
| 21   | 1.168530e+03  | 1.426457e+02  | -4.822465e+01 |
| 22   | -8.175534e+01 | -4.717025e+01 | 4.551550e+02  |
| 23   | -3.778051e+02 | -5.430075e+02 | 4.063378e+02  |
| 24   | -8.853976e+02 | 2.871587e+02  | 6.792665e+02  |
| 25   | 5.637671e+02  | 4.622507e+02  | -2.218452e+03 |
| 26   | -6.200354e+02 | 7.267502e+02  | -2.612937e+02 |
| 27   | 1.601903e+02  | -1.410577e+03 | 1.464034e+03  |
| 28   | -9.503685e+02 | 9.238176e+02  | -8.273972e+02 |
| 29   | 1.515819e+03  | -3.534206e+02 | -1.447680e+03 |
| 30   | 5.493489e+02  | 8.598080e+02  | 7.583003e+02  |
| 31   | -2.233097e+02 | 1.109113e+02  | 7.836261e+02  |
| 32   | 1.241104e+03  | 8.894425e+02  | 6.637767e+02  |
| 33   | 5.875845e+03  | 8.622340e+03  | -3.585720e+03 |
| 34   | -2.822911e+03 | -4.108295e+03 | -2.054280e+02 |
| 35   | -7.115626e+03 | 2.805718e+03  | 5.518981e+03  |
| 36   | 7.569129e+03  | -2.516784e+03 | 1.059384e+03  |
| 37   | -1.697151e+03 | -6.540339e+03 | 1.515390e+03  |
| 38   | -8.800563e+02 | 3.098355e+03  | 6.250763e+03  |
| 39   | -6.106838e+01 | -4.053606e+03 | -1.434256e+03 |
| 40   | -2.854438e+03 | 4.943756e+03  | 9.793458e+03  |
| 41   | 1.926055e+03  | 3.490798e+02  | -1.380052e+02 |
| 42   | 2.485061e+03  | -7.559693e+02 | 1.023604e+03  |
| 43   | 3.608567e+02  | 1.563617e+02  | 9.400122e+01  |
| 44   | -6.115907e+02 | 8.783613e+02  | -2.742375e+02 |
| 45   | -4.595337e+02 | 3.444616e+02  | -3.239447e+02 |

|    |               |               |               |
|----|---------------|---------------|---------------|
| 46 | 5.882320e+01  | 6.376931e+02  | -4.349495e+02 |
| 47 | -4.556286e+03 | -1.818022e+02 | 6.583473e+02  |
| 48 | -5.249947e+03 | -5.386196e+03 | -8.577210e+02 |
| 49 | 1.025504e+04  | -3.618479e+03 | -4.540886e+03 |
| 50 | 7.092748e+03  | 1.319327e+03  | 4.067776e+03  |
| 51 | -3.445595e+03 | -7.245076e+03 | 8.569732e+02  |
| 52 | 5.883067e+02  | -9.583517e+02 | -4.651080e+02 |
| 53 | 2.363083e+02  | 5.577212e+02  | -1.359486e+02 |
| 54 | -7.283492e+02 | -2.298839e+02 | 7.474971e+02  |
| 55 | -1.577298e+03 | 2.829529e+02  | -1.399694e+03 |
| 56 | -6.858602e+03 | 5.838943e+03  | -1.359567e+03 |
| 57 | -3.105967e+03 | 1.070573e+04  | 4.386130e+00  |
| 58 | -1.789612e+03 | 5.644087e+02  | 5.321872e+03  |
| 59 | 2.937519e+03  | 4.844183e+03  | -3.921357e+03 |
| 60 | 3.814605e+03  | -2.055296e+03 | -4.963456e+02 |
| 61 | -6.925352e+03 | -1.924816e+03 | -8.243515e+03 |
| 62 | -1.025342e+04 | -4.087440e+03 | 9.256255e+03  |
| 63 | 1.394851e+03  | 7.882043e+03  | 2.813918e+02  |
| 64 | 4.181809e+03  | -1.312673e+03 | 6.125880e+02  |
| 65 | -1.092724e+02 | 4.314863e+02  | -1.757816e+03 |
| 66 | 5.521840e+03  | 2.189610e+03  | 7.630339e+03  |
| 67 | -1.645197e+03 | 1.681391e+03  | -1.510389e+03 |

trajectory 3

| atom | VX            | VY            | VZ            |
|------|---------------|---------------|---------------|
| 1    | 2.327109e+02  | -1.656760e+02 | 3.231752e+02  |
| 2    | 1.063459e+03  | 4.680085e+02  | 3.732057e+02  |
| 3    | -4.716969e+01 | -2.280743e+02 | -1.678678e+03 |
| 4    | -2.673649e+02 | -5.522051e+01 | 9.868123e+02  |
| 5    | -4.505434e+02 | -7.232055e+02 | -4.570378e+02 |
| 6    | -2.302360e+03 | -3.876630e+03 | -5.419855e+02 |
| 7    | -7.020337e+03 | 3.814366e+03  | -4.170564e+03 |
| 8    | 6.966566e+03  | -1.858963e+02 | 6.611282e+03  |
| 9    | 2.455074e+02  | -1.567363e+02 | 1.971493e+02  |
| 10   | 6.103792e+02  | -1.701101e+03 | -5.078936e+02 |
| 11   | -4.978061e+02 | 6.785895e+01  | 6.930137e+00  |
| 12   | 2.281289e+03  | -1.035602e+04 | 1.505247e+02  |
| 13   | 1.704648e+03  | 3.595891e+03  | -3.547538e+02 |
| 14   | -1.534496e+02 | 2.974643e+02  | 7.695287e+02  |
| 15   | -1.089401e+03 | -1.164919e+03 | -4.378254e+02 |
| 16   | -5.868305e+02 | 1.492043e+03  | 2.579133e+02  |
| 17   | -1.912650e+02 | 4.382199e+01  | -6.236258e+01 |
| 18   | 1.325662e+03  | 3.667405e+02  | 3.781328e+02  |
| 19   | -1.498184e+03 | 1.282855e+03  | 7.366071e+01  |

|    |               |               |               |
|----|---------------|---------------|---------------|
| 20 | 3.150710e+01  | -8.208045e+02 | 7.966593e+02  |
| 21 | -1.725149e+02 | 6.805483e+02  | -6.747277e+02 |
| 22 | -1.372994e+03 | 1.217089e+03  | -1.128856e+03 |
| 23 | -7.284825e+02 | -2.929177e+02 | -2.486386e+01 |
| 24 | 6.084406e+02  | -1.180927e+02 | 8.742111e+02  |
| 25 | 2.153219e+02  | 9.843227e+02  | 1.121195e+03  |
| 26 | 3.332656e+02  | -1.233029e+02 | -1.187567e+03 |
| 27 | 1.692800e+03  | 7.223434e+01  | -7.457352e+02 |
| 28 | -2.666252e+03 | -1.050498e+02 | 5.580975e+02  |
| 29 | 1.733413e+03  | -6.701065e+02 | 5.366062e+01  |
| 30 | 5.185179e+02  | 3.378479e+02  | -1.514965e+03 |
| 31 | 1.911684e+01  | 5.389822e+02  | 1.145569e+03  |
| 32 | 6.105216e+02  | -2.078264e+01 | 1.337435e+03  |
| 33 | -2.383867e+03 | -9.886173e+03 | 5.692173e+03  |
| 34 | 6.049617e+03  | -2.754391e+03 | 2.077648e+03  |
| 35 | 4.039362e+03  | -3.633384e+03 | -1.057704e+03 |
| 36 | 2.705631e+03  | 5.328037e+03  | 6.078682e+03  |
| 37 | -9.969951e+03 | -5.313384e+03 | 7.458157e+02  |
| 38 | 3.592375e+03  | 8.308711e+03  | 1.076365e+01  |
| 39 | 3.235317e+03  | 1.801078e+03  | -4.955905e+03 |
| 40 | -5.876739e+03 | -1.472223e+02 | 2.386526e+03  |
| 41 | -4.986946e+02 | -5.070033e+01 | -2.701615e+02 |
| 42 | 1.385139e+02  | 4.148546e+02  | -8.205081e+02 |
| 43 | -8.251947e+02 | -4.813732e+02 | -6.578533e+02 |
| 44 | -9.336207e+02 | 1.385199e+03  | -8.108335e+02 |
| 45 | 1.461357e+03  | 1.041128e+03  | 1.056011e+02  |
| 46 | 4.175554e+01  | -1.673182e+02 | 1.934995e+02  |
| 47 | 5.904615e+03  | -1.369739e+03 | 6.596901e+02  |
| 48 | 6.117673e+03  | -7.668888e+01 | -4.291341e+03 |
| 49 | -5.494474e+02 | -6.396481e+03 | 5.098001e+03  |
| 50 | -3.757697e+03 | -1.846569e+03 | 4.450088e+03  |
| 51 | 8.901579e+03  | 4.975692e+03  | 4.875589e+02  |
| 52 | 1.727523e+02  | 5.292416e+02  | -7.337525e+02 |
| 53 | 1.721727e+02  | 1.394890e+03  | 6.629425e+02  |
| 54 | -1.375589e+03 | -5.753787e+01 | -1.958049e+03 |
| 55 | 8.226282e+02  | -2.011001e+03 | -1.086934e+03 |
| 56 | 1.005453e+04  | -2.636969e+02 | 6.420510e+03  |
| 57 | -1.394823e+03 | -8.603777e+02 | 1.269416e+03  |
| 58 | -1.067573e+03 | 4.161567e+02  | -3.793018e+02 |
| 59 | -1.447155e+03 | -7.763883e+03 | 8.804762e+02  |
| 60 | -4.627505e+03 | -6.688159e+03 | -5.641890e+03 |
| 61 | -8.843820e+02 | -3.751618e+03 | -4.548441e+03 |
| 62 | -5.974205e+02 | -2.683585e+03 | 5.805853e+03  |
| 63 | 3.576716e+03  | 2.916571e+03  | -5.607494e+03 |
| 64 | 5.317431e+02  | -5.055429e+03 | 6.812850e+03  |
| 65 | -2.664656e+03 | 5.863411e+03  | 9.187793e+02  |



|    |               |               |               |
|----|---------------|---------------|---------------|
| 66 | -2.513816e+03 | 9.471287e+02  | -2.840778e+03 |
| 67 | -9.311998e+03 | -7.992725e+02 | -9.986001e+02 |

trajectory 4

| atom | VX            | VY            | VZ            |
|------|---------------|---------------|---------------|
| 1    | -9.807884e+01 | 7.960666e+01  | -1.503840e+02 |
| 2    | -5.101638e+02 | -8.147986e+02 | 2.239925e+03  |
| 3    | 4.283079e+02  | -4.271187e+02 | -1.007660e+03 |
| 4    | 7.049404e+02  | -4.090994e+02 | 7.219114e+02  |
| 5    | 5.068863e+02  | 5.283009e+02  | 6.950587e+02  |
| 6    | 3.946899e+03  | -5.959369e+03 | -1.206605e+03 |
| 7    | 1.553064e+03  | -4.379683e+03 | 2.264275e+03  |
| 8    | -4.890957e+03 | -3.160202e+03 | -7.410854e+03 |
| 9    | -6.976870e+02 | -2.196906e+02 | 8.405341e+00  |
| 10   | 4.202377e+01  | 4.192717e+02  | 7.657959e+02  |
| 11   | 5.100413e+02  | 2.432339e+03  | -1.507866e+03 |
| 12   | -5.241804e+03 | -6.009400e+03 | 2.518302e+02  |
| 13   | -4.317249e+03 | 2.037135e+03  | -1.269520e+03 |
| 14   | -5.362951e+02 | -1.120741e+03 | -1.277359e+02 |
| 15   | -4.128392e+02 | 7.324684e+02  | -2.389757e+03 |
| 16   | 3.713993e+02  | -2.909646e+00 | -3.640862e+02 |
| 17   | -2.900580e+02 | 4.879504e+01  | 6.571952e+01  |
| 18   | -1.237027e+03 | 3.735838e+02  | -5.119288e+02 |
| 19   | -2.310590e+02 | -7.279541e+02 | 1.250112e+03  |
| 20   | 8.249121e+02  | -8.658777e+02 | -6.444707e+02 |
| 21   | 7.231530e+02  | -1.183542e+02 | 9.315321e+02  |
| 22   | -6.452546e+02 | -4.003290e+02 | 9.645645e+02  |
| 23   | 1.967075e+03  | -4.864303e+02 | 3.706652e+02  |
| 24   | 1.216925e+03  | 4.051994e+02  | 2.831843e+02  |
| 25   | -1.058006e+03 | -2.016420e+03 | -1.735010e+03 |
| 26   | -9.292243e+01 | 9.815928e+02  | 2.522344e+02  |
| 27   | -8.229600e+02 | -9.928235e+01 | -6.365861e+01 |
| 28   | 1.541583e+03  | -3.580597e+02 | -8.295607e+02 |
| 29   | -7.404902e+02 | -6.707427e+02 | 1.277609e+02  |
| 30   | -1.210288e+03 | 4.387791e+02  | -1.552825e+03 |
| 31   | 2.186763e+03  | -1.092654e+03 | 1.794307e+03  |
| 32   | -1.113476e+02 | 1.986766e+03  | -5.674150e+02 |
| 33   | 2.528125e+03  | -3.519985e+03 | 1.312299e+03  |
| 34   | -1.301054e+03 | 7.459976e+03  | -7.641303e+03 |
| 35   | 2.499484e+03  | -6.347670e+03 | 2.437741e+03  |
| 36   | 3.171419e+03  | 2.362360e+03  | 4.656696e+03  |
| 37   | -3.982521e+03 | 4.201337e+03  | 1.015005e+03  |
| 38   | -6.163314e+03 | -7.105518e+03 | 2.983258e+03  |
| 39   | -1.547700e+03 | -5.180125e+02 | 2.630193e+03  |

|    |               |               |               |
|----|---------------|---------------|---------------|
| 40 | 2.128993e+02  | -9.954267e+03 | -2.216040e+03 |
| 41 | -6.934337e+02 | -1.357693e+02 | -6.474957e+02 |
| 42 | -6.573356e+02 | -1.697472e+02 | 9.442145e+02  |
| 43 | 3.141067e+03  | 6.774273e+02  | -1.259246e+02 |
| 44 | -5.592697e+02 | -2.974175e+02 | 1.245750e+03  |
| 45 | -6.837625e+02 | 2.257688e+02  | 2.602039e+02  |
| 46 | 4.868657e+01  | 3.728993e+02  | -1.009901e+03 |
| 47 | -4.537560e+02 | 3.495124e+03  | 1.071679e+03  |
| 48 | -5.014368e+03 | -2.176691e+03 | 3.494125e+03  |
| 49 | -5.160440e+03 | 1.307708e+03  | 2.103377e+03  |
| 50 | 4.459048e+03  | 4.549023e+03  | -2.455658e+03 |
| 51 | -6.018242e+03 | -5.554333e+03 | 7.641332e+02  |
| 52 | 1.310867e+03  | 2.285353e+03  | 3.582573e+02  |
| 53 | -2.156314e+02 | 1.067370e+03  | -2.405164e+02 |
| 54 | -4.141071e+02 | 4.695409e+02  | -2.200808e+02 |
| 55 | 8.862070e+02  | 7.926122e+01  | -5.603073e+02 |
| 56 | -5.604653e+03 | 5.541030e+03  | -1.633011e+03 |
| 57 | 6.606043e+02  | -6.365212e+03 | -3.455808e+03 |
| 58 | -4.295807e+03 | 1.345996e+03  | 3.630153e+03  |
| 59 | 2.716814e+02  | -2.069223e+03 | 2.387198e+03  |
| 60 | -4.784326e+03 | -1.137520e+04 | 1.590598e+03  |
| 61 | -4.267583e+03 | 1.422098e+03  | 2.131889e+01  |
| 62 | 3.424530e+03  | 6.655864e+01  | 4.555806e+02  |
| 63 | -5.928784e+03 | -6.125964e+03 | -9.724993e+01 |
| 64 | 5.346520e+03  | 4.295104e+03  | 1.049334e+03  |
| 65 | 2.674870e+02  | 1.797501e+02  | -1.540513e+03 |
| 66 | 8.111994e+03  | -3.809136e+03 | 9.221356e+03  |
| 67 | 1.199751e+03  | 2.640640e+03  | 1.230544e+03  |

trajectory 5

| atom | VX            | VY            | VZ            |
|------|---------------|---------------|---------------|
| 1    | -2.505206e+01 | -1.545841e+02 | -4.330031e+02 |
| 2    | -3.432174e+02 | 2.375832e+03  | 1.070121e+03  |
| 3    | 4.568963e+02  | -1.873223e+03 | -1.663787e+03 |
| 4    | 5.739498e+02  | 2.851557e+02  | -2.011549e+01 |
| 5    | 3.356001e+02  | 5.480468e+02  | 6.527663e+02  |
| 6    | -3.349351e+03 | 5.116327e+01  | -5.610938e+03 |
| 7    | -3.102487e+03 | -2.918400e+03 | -1.918155e+03 |
| 8    | -7.365184e+03 | -5.292531e+03 | -5.622254e+03 |
| 9    | -3.866439e+02 | 7.318962e+01  | 4.854235e+01  |
| 10   | 6.304249e+02  | -4.093372e+02 | -1.154043e+02 |
| 11   | -2.044831e+03 | -3.942069e+02 | -9.089711e+02 |
| 12   | 6.806863e+02  | -1.912401e+03 | 2.736283e+03  |
| 13   | -4.003013e+03 | -7.902662e+03 | 5.301563e+03  |

|    |               |               |               |
|----|---------------|---------------|---------------|
| 14 | 1.072458e+03  | -8.144527e+01 | 4.052847e+02  |
| 15 | 5.206094e+02  | 3.330663e+02  | -8.689774e+01 |
| 16 | -5.015699e+02 | 9.207737e+01  | -1.071754e+01 |
| 17 | -1.902481e+02 | -1.615032e+02 | -1.052085e+02 |
| 18 | -4.492782e+02 | 7.227686e+02  | 1.511271e+02  |
| 19 | 3.519292e+02  | -1.341775e+03 | -5.604209e+02 |
| 20 | -2.753994e+02 | 1.515081e+03  | -3.120675e+02 |
| 21 | 1.230307e+03  | -3.647666e+02 | 8.783834e+02  |
| 22 | 1.128710e+02  | -1.586423e+03 | 1.324279e+03  |
| 23 | 9.853403e+02  | 7.072975e+02  | -3.173954e+02 |
| 24 | 8.717746e+02  | -7.492018e+01 | 2.352924e+01  |
| 25 | -7.707605e+02 | -1.178121e+03 | -1.445137e+03 |
| 26 | 3.645378e+02  | 7.405060e+02  | 7.829016e+02  |
| 27 | 9.254520e+01  | -4.801357e+02 | 1.859774e+03  |
| 28 | 1.092910e+03  | -1.098212e+03 | -3.518506e+02 |
| 29 | -8.787288e+02 | -3.270537e+02 | 1.579083e+03  |
| 30 | 1.206703e+02  | -8.696367e+02 | 1.912913e+01  |
| 31 | -1.054161e+03 | 1.146212e+03  | -7.695585e+02 |
| 32 | 1.028209e+03  | 1.509901e+03  | 1.863091e+02  |
| 33 | 5.123827e+03  | -5.561023e+03 | 5.023168e+03  |
| 34 | 1.441605e+03  | 5.141386e+03  | -1.113040e+03 |
| 35 | -2.558896e+03 | -2.020709e+02 | 5.196592e+03  |
| 36 | -8.059726e+03 | 5.460346e+03  | -4.519889e+03 |
| 37 | -2.854158e+03 | 5.233210e+03  | -6.934624e+03 |
| 38 | 3.797942e+03  | 4.831333e+03  | -2.189493e+03 |
| 39 | 1.157880e+02  | 1.030655e+03  | 5.647576e+03  |
| 40 | -6.482476e+03 | -5.513250e+02 | -7.506844e+01 |
| 41 | 1.554007e+03  | 8.486708e+02  | 1.604420e+03  |
| 42 | 1.649011e+03  | -5.337014e+02 | -1.262244e+03 |
| 43 | -2.447287e+02 | -1.105986e+03 | 1.028774e+02  |
| 44 | -3.821429e+01 | 1.073346e+01  | 8.241718e+01  |
| 45 | 1.604386e+03  | -6.879999e+02 | -1.051921e+02 |
| 46 | -1.831745e+03 | 1.320561e+03  | 1.773720e+02  |
| 47 | 1.888766e+03  | 3.580061e+03  | 1.106021e+02  |
| 48 | -5.922945e+03 | -2.819132e+03 | 6.053905e+03  |
| 49 | -2.981239e+03 | 4.328904e+03  | -5.488100e+02 |
| 50 | -5.829724e+03 | 1.532207e+03  | -4.360904e+03 |
| 51 | -6.597650e+03 | -5.756244e+03 | 5.987996e+03  |
| 52 | -2.294827e+02 | 2.178620e+02  | -2.260690e+01 |
| 53 | -1.013984e+03 | 1.227142e+03  | -3.416003e+02 |
| 54 | -5.866804e+02 | -2.516740e+02 | -8.627571e+02 |
| 55 | 5.370110e+02  | 7.027246e+02  | -1.716582e+02 |
| 56 | 4.249694e+03  | -8.199842e+02 | 7.181491e+02  |
| 57 | -1.898169e+03 | -1.141724e+03 | 2.080891e+03  |
| 58 | -2.696715e+03 | -5.496239e+03 | 8.519426e+03  |
| 59 | -6.833148e+03 | 1.517227e+03  | 1.874716e+03  |

|    |               |               |               |
|----|---------------|---------------|---------------|
| 60 | 2.224593e+03  | 1.243125e+03  | 4.192866e+03  |
| 61 | 9.667077e+03  | -5.659032e+03 | 3.692221e+03  |
| 62 | -2.055402e+03 | -7.663445e+02 | -3.010058e+03 |
| 63 | 6.317120e+02  | 9.704627e+03  | 7.586077e+03  |
| 64 | -4.896119e+03 | 2.044835e+03  | 1.556658e+03  |
| 65 | 2.907104e+03  | 1.220025e+03  | -1.649320e+02 |
| 66 | -8.017353e+03 | 4.150089e+02  | -5.702486e+03 |
| 67 | 6.942002e+03  | -3.027431e+03 | 4.685477e+03  |

trajectory 6

| atom | VX            | VY            | VZ            |
|------|---------------|---------------|---------------|
| 1    | -2.127671e+02 | 1.209478e+02  | 8.765728e+01  |
| 2    | -3.193294e+02 | 8.090333e+02  | 2.858030e+02  |
| 3    | -3.293415e+02 | -8.977905e+02 | -4.071713e+02 |
| 4    | 7.325679e+02  | 4.409427e+01  | -1.069504e+03 |
| 5    | 3.096397e+02  | -1.322892e+03 | 9.940329e+02  |
| 6    | -1.071439e+02 | 7.652066e+03  | -6.865888e+03 |
| 7    | -1.708148e+03 | 8.256581e+03  | 2.060601e+03  |
| 8    | 6.207886e+03  | -1.668687e+03 | -8.982002e+02 |
| 9    | 7.341996e+02  | 3.287525e+02  | 1.857150e+03  |
| 10   | -6.251818e+01 | 3.553611e+02  | -2.788141e+02 |
| 11   | -1.989705e+03 | -1.100329e+03 | 1.608168e+03  |
| 12   | -2.781529e+03 | 5.028814e+03  | -3.155835e+03 |
| 13   | -3.017060e+03 | -2.805586e+03 | 8.299447e+01  |
| 14   | 1.342889e+03  | -4.121229e+02 | 1.589201e+03  |
| 15   | 6.990186e+02  | 5.830127e+02  | 3.659462e+02  |
| 16   | -4.625260e+02 | 1.268376e+02  | 9.178855e+01  |
| 17   | -1.766859e+02 | 2.410776e+02  | 8.290037e+01  |
| 18   | 1.120776e+03  | -1.054583e+03 | -1.009438e+02 |
| 19   | 7.616493e+02  | 1.539935e+03  | -1.711367e+03 |
| 20   | 5.281278e+01  | -9.358480e+02 | 3.385418e+02  |
| 21   | 1.600766e+03  | -1.494546e+02 | -7.942564e+02 |
| 22   | -1.155622e+03 | -8.689027e+02 | 5.475882e+02  |
| 23   | -1.946700e+03 | -5.955240e+02 | -1.254756e+03 |
| 24   | -1.073670e+03 | 2.094751e+01  | -4.658595e+02 |
| 25   | 1.290885e+03  | 8.236881e+02  | -1.033153e+03 |
| 26   | -9.535114e+02 | -1.064361e+03 | -8.987001e+02 |
| 27   | 3.835622e+02  | -6.564325e+02 | -1.171223e+02 |
| 28   | -5.848584e+02 | -1.119673e+03 | 2.389641e+02  |
| 29   | 7.988623e+02  | 9.002267e+02  | 9.573029e+02  |
| 30   | -6.181899e+02 | 2.092081e+03  | -1.286254e+03 |
| 31   | 8.812675e+02  | -5.641796e+02 | 3.415952e+02  |
| 32   | -1.261857e+03 | 2.137410e+03  | -9.631950e+02 |
| 33   | -1.845447e+03 | -2.061205e+03 | 6.921450e+02  |

|    |               |               |               |
|----|---------------|---------------|---------------|
| 34 | -4.419334e+03 | -8.336708e+03 | 2.724678e+03  |
| 35 | 2.285241e+03  | -2.177226e+03 | -1.086473e+03 |
| 36 | 4.431922e+03  | -7.390695e+03 | 6.331023e+03  |
| 37 | 1.885470e+03  | 6.368398e+03  | -4.840960e+03 |
| 38 | 2.826049e+03  | -1.868548e+03 | 3.873995e+03  |
| 39 | -2.236798e+03 | 2.416305e+03  | -6.523691e+02 |
| 40 | 6.469333e+03  | -1.314495e+03 | -1.784596e+03 |
| 41 | 3.616462e+02  | -8.016517e+02 | -4.879850e+02 |
| 42 | 1.950799e+03  | -1.692598e+01 | 5.772201e+02  |
| 43 | -1.024694e+03 | -9.156537e+02 | -1.753149e+02 |
| 44 | 2.256958e+02  | 1.632344e+03  | 3.313699e+02  |
| 45 | 1.108550e+02  | -6.518345e+02 | 1.588448e+02  |
| 46 | -1.495074e+03 | -4.730168e+02 | -3.999249e+02 |
| 47 | -3.448581e+03 | -8.296375e+03 | 1.763652e+03  |
| 48 | 1.748477e+03  | 5.878997e+03  | -3.231289e+03 |
| 49 | 1.052311e+04  | -3.813364e+02 | -1.587904e+03 |
| 50 | -3.918198e+03 | 3.557196e+03  | 1.271270e+03  |
| 51 | 1.500884e+03  | 3.500698e+03  | 8.238195e+02  |
| 52 | -1.448449e+03 | 4.897327e+02  | -3.350673e+02 |
| 53 | 1.090238e+03  | 9.215846e+01  | -1.795687e+03 |
| 54 | 3.856653e+02  | 1.293503e+03  | 9.347867e+01  |
| 55 | 9.900787e+02  | -4.143772e+02 | 1.084266e+03  |
| 56 | 1.031617e+04  | -2.134595e+03 | 4.694441e+03  |
| 57 | 3.640060e+03  | 5.061444e+03  | -4.242249e+03 |
| 58 | 3.745750e+03  | -1.754324e+03 | 3.608031e+03  |
| 59 | -2.361715e+03 | 3.656127e+02  | 9.112063e+03  |
| 60 | 3.608279e+03  | -2.853167e+03 | 1.429212e+03  |
| 61 | 7.295774e+02  | -4.638784e+03 | -1.909623e+03 |
| 62 | 2.994924e+03  | -3.584401e+03 | 8.889053e+03  |
| 63 | -8.503642e+02 | -4.032864e+03 | -7.065317e+02 |
| 64 | -4.985474e+03 | -3.512046e+03 | -2.883990e+03 |
| 65 | -1.247878e+03 | -1.724591e+03 | -4.347254e+02 |
| 66 | -7.671021e+03 | -3.378549e+03 | -5.075801e+03 |
| 67 | -2.039277e+02 | 2.403877e+03  | 2.534751e+03  |

trajectory 7

| atom | VX            | VY            | VZ            |
|------|---------------|---------------|---------------|
| 1    | 1.289549e+01  | 1.196993e+02  | -2.346793e+02 |
| 2    | -1.212413e+01 | -1.972981e+03 | 3.556911e+02  |
| 3    | 9.102285e+02  | 5.494921e+02  | 1.500250e+03  |
| 4    | -1.282752e+03 | 1.338040e+03  | -1.999131e+03 |
| 5    | -2.770457e+02 | 1.138429e+03  | 1.070340e+03  |
| 6    | -8.510700e+03 | 3.983615e+03  | 2.952952e+03  |
| 7    | 1.234831e+03  | -5.270636e+03 | -4.447267e+03 |

|    |               |               |               |
|----|---------------|---------------|---------------|
| 8  | 6.898603e+02  | -5.087385e+03 | -3.086748e+03 |
| 9  | -1.749669e+02 | 2.761974e+02  | -3.700248e+02 |
| 10 | -8.266707e+02 | -5.098552e+02 | -8.028422e+02 |
| 11 | 6.276569e+02  | -1.888245e+02 | 1.855095e+02  |
| 12 | 1.350036e+03  | -1.398696e+03 | 5.717690e+03  |
| 13 | -3.192591e+03 | -6.246821e+03 | 8.297473e+03  |
| 14 | -6.340817e+02 | -5.836611e+02 | 4.550392e+02  |
| 15 | 2.106327e+03  | 1.975231e+03  | 1.583602e+03  |
| 16 | 2.706696e+02  | -1.836765e+02 | 2.375612e+02  |
| 17 | 1.427060e+02  | -1.415768e+02 | 3.160880e+02  |
| 18 | 1.106972e+03  | -5.006615e+02 | -3.084811e+01 |
| 19 | 3.556962e+02  | 1.455295e+03  | -7.663218e+02 |
| 20 | -8.458380e+02 | 2.557937e+02  | -3.556759e+02 |
| 21 | -2.101516e+02 | 7.143300e+02  | -6.235564e+02 |
| 22 | 7.167356e+02  | -2.377343e+03 | 1.082367e+03  |
| 23 | 2.787662e+01  | -6.538092e+02 | 5.037799e+02  |
| 24 | -1.694415e+02 | 2.735562e+01  | -1.141143e+03 |
| 25 | 2.034899e+02  | 1.332097e+03  | -3.260260e+02 |
| 26 | 9.529844e+01  | 4.704724e+02  | -4.611243e+02 |
| 27 | 4.159030e+02  | 4.728888e+02  | -1.959661e+02 |
| 28 | 9.458188e+02  | 2.312310e+02  | -2.385431e+02 |
| 29 | -1.754230e+03 | -6.609818e+01 | -1.280645e+02 |
| 30 | -2.032557e+01 | 7.161476e+01  | -9.121763e+02 |
| 31 | 6.132363e+02  | 8.833582e+02  | -7.305263e+02 |
| 32 | -1.054284e+03 | -2.910441e+03 | 9.221481e+02  |
| 33 | 8.385329e+03  | 6.344424e+03  | -2.796590e+03 |
| 34 | 9.972619e+02  | -6.053160e+03 | 7.225060e+02  |
| 35 | -6.587059e+03 | 1.333442e+03  | 5.806676e+03  |
| 36 | 6.618943e+03  | -1.994473e+03 | -7.445966e+02 |
| 37 | 2.793089e+03  | 4.514734e+03  | -2.479181e+03 |
| 38 | -6.973410e+03 | -4.032759e+03 | -2.105186e+03 |
| 39 | 1.987700e+03  | -3.360653e+03 | -1.258485e+03 |
| 40 | -5.932756e+03 | 2.792436e+03  | -1.232248e+03 |
| 41 | -2.410873e+02 | -9.656039e+02 | 9.912842e+02  |
| 42 | -9.483900e+02 | 6.110822e+02  | -7.831063e+01 |
| 43 | 3.143148e+02  | -2.271149e+02 | 5.040050e+02  |
| 44 | -4.924018e+02 | -5.163247e+02 | -4.725725e+01 |
| 45 | 2.356804e+03  | 1.038370e+03  | -1.082910e+02 |
| 46 | 2.039868e+02  | -5.120358e+02 | -2.506129e+02 |
| 47 | 3.788549e+03  | -6.734227e+03 | 2.592922e+03  |
| 48 | -2.090931e+03 | 1.820707e+03  | 1.668942e+03  |
| 49 | -6.717982e+03 | 4.132071e+03  | -1.591198e+02 |
| 50 | 3.079384e+03  | 5.219827e+03  | 2.901618e+03  |
| 51 | -1.087562e+04 | -2.296709e+03 | -5.330934e+03 |
| 52 | -1.158300e+03 | 1.663035e+02  | -8.388645e+02 |
| 53 | 3.312215e+01  | -5.407212e+02 | 4.417507e+02  |

|    |               |               |               |
|----|---------------|---------------|---------------|
| 54 | 9.257568e+02  | 1.648080e+03  | 1.084749e+03  |
| 55 | -3.998624e+02 | 6.753741e+02  | -8.255026e+02 |
| 56 | -2.867821e+03 | 1.802366e+03  | -6.847469e+03 |
| 57 | -8.226727e+03 | 1.094989e+03  | 9.136552e+03  |
| 58 | -1.773816e+03 | -5.398390e+03 | 4.731487e+02  |
| 59 | 2.601637e+03  | -5.658774e+01 | -1.089973e+04 |
| 60 | 5.213917e+02  | 1.102501e+03  | -5.028546e+02 |
| 61 | 8.227464e+02  | 4.510205e+03  | -1.834317e+03 |
| 62 | -1.427418e+03 | -5.776777e+03 | 7.835892e+03  |
| 63 | 1.192410e+03  | -1.920115e+03 | 3.073858e+03  |
| 64 | -2.699262e+03 | -1.816257e+03 | -5.600518e+02 |
| 65 | 4.400212e+03  | -6.069837e+03 | 6.962281e+03  |
| 66 | -1.205575e+03 | -3.057637e+03 | -4.759466e+03 |
| 67 | -6.267807e+02 | -5.663083e+03 | 1.306022e+03  |

#### trajectory 8

| atom | VX            | VY            | VZ            |
|------|---------------|---------------|---------------|
| 1    | -4.751278e+02 | -4.725065e+02 | -1.597727e+02 |
| 2    | -6.178166e+01 | 3.431458e+02  | 1.607767e+03  |
| 3    | -4.600879e+02 | 1.627969e+03  | -5.387888e+02 |
| 4    | 1.540012e+03  | -2.688063e+02 | -9.414591e+02 |
| 5    | -5.790029e+02 | -5.973473e+02 | -5.706469e+02 |
| 6    | 7.032323e+01  | -3.514042e+03 | 2.150972e+03  |
| 7    | -3.396717e+03 | 2.068180e+03  | 2.164807e+01  |
| 8    | 7.584040e+03  | 3.645599e+03  | 3.526700e+03  |
| 9    | -6.066144e+02 | -4.946456e+02 | 1.654517e+03  |
| 10   | 1.365298e+03  | -1.680538e+03 | -8.479256e+01 |
| 11   | -4.942517e+02 | 9.101565e+02  | 1.271849e+03  |
| 12   | -6.294976e+02 | -6.946084e+03 | 5.125742e+03  |
| 13   | -5.155430e+03 | 5.147252e+03  | 2.572746e+03  |
| 14   | 2.583009e+02  | 6.473132e+02  | 1.280852e+02  |
| 15   | -3.559409e+01 | 5.545672e+02  | -1.218533e+03 |
| 16   | -3.048818e+02 | 1.996227e+02  | -7.346546e+02 |
| 17   | 3.484044e+01  | 4.225057e+01  | 2.726626e+02  |
| 18   | 1.653605e+03  | 1.112844e+03  | 2.724119e+02  |
| 19   | -1.120439e+03 | 9.992890e+02  | -4.030428e+02 |
| 20   | 9.930114e+02  | -7.791481e+02 | -9.255760e+01 |
| 21   | -1.016257e+03 | -3.136891e+02 | -1.843285e+02 |
| 22   | -6.799987e+02 | 1.257808e+03  | 4.853245e+02  |
| 23   | 7.496936e+02  | 2.723705e+02  | -3.063853e+02 |
| 24   | 5.424206e+02  | -8.156234e+02 | -9.030811e+02 |
| 25   | -1.289505e+03 | 7.327733e+02  | 1.575823e+03  |
| 26   | -3.356942e+02 | 4.037462e+02  | 1.837835e+02  |
| 27   | 1.280660e+03  | -7.546178e+02 | 3.254461e+02  |

|    |               |               |               |
|----|---------------|---------------|---------------|
| 28 | 1.050590e+03  | -1.958281e+03 | 6.524735e+01  |
| 29 | -3.956939e+02 | 1.603139e+02  | 6.381175e+02  |
| 30 | 2.775821e+02  | 2.899809e+02  | -2.588692e+02 |
| 31 | -1.740723e+03 | 3.133244e+02  | 4.094896e+02  |
| 32 | 9.729352e+02  | -1.225470e+03 | -6.046347e+02 |
| 33 | -4.399927e+03 | 1.465472e+03  | -1.470660e+03 |
| 34 | 4.053161e+03  | 9.698067e+03  | 2.239355e+03  |
| 35 | 1.166930e+03  | -6.549572e+03 | -4.315452e+03 |
| 36 | -7.292909e+03 | -8.164760e+02 | 8.573944e+02  |
| 37 | -1.093172e+04 | 1.549623e+03  | -2.581777e+03 |
| 38 | -4.112109e+03 | 7.089983e+02  | 3.384755e+03  |
| 39 | 2.136269e+03  | -8.531518e+02 | 1.764507e+03  |
| 40 | -6.206506e+03 | 3.144904e+03  | -7.327631e+02 |
| 41 | 6.049529e+02  | -3.133078e+02 | -9.631102e+02 |
| 42 | -3.421607e+02 | 2.281529e+03  | -2.556020e+02 |
| 43 | -5.505032e+02 | 1.749707e+02  | 5.281901e+02  |
| 44 | -4.386836e+02 | 8.344670e+02  | 7.314509e+02  |
| 45 | 9.203379e+02  | -2.740110e+01 | -1.064633e+03 |
| 46 | -2.311012e+02 | -1.400182e+03 | 1.216497e+03  |
| 47 | -3.538664e+02 | 4.595930e+02  | -5.600269e+03 |
| 48 | 9.942159e+03  | 2.647557e+03  | -5.785011e+03 |
| 49 | -1.191918e+03 | 4.766808e+03  | -6.582445e+03 |
| 50 | 2.367166e+03  | -4.067225e+03 | 5.894949e+02  |
| 51 | 9.056674e+01  | 2.480019e+03  | -1.159838e+03 |
| 52 | -4.582229e+02 | 9.961310e+01  | -8.496243e+01 |
| 53 | 1.278693e+03  | 4.977582e+02  | -5.485258e+01 |
| 54 | 4.564199e+02  | -7.811197e+02 | -6.170752e+02 |
| 55 | 1.731364e+03  | 1.521553e+03  | 9.023959e+01  |
| 56 | 1.625267e+03  | 4.293643e+03  | 7.851648e+02  |
| 57 | 4.829039e+02  | -5.843636e+03 | -8.978428e+03 |
| 58 | 2.950695e+03  | 6.748000e+03  | -2.598607e+02 |
| 59 | -3.207461e+03 | 1.035553e+03  | 1.398820e+03  |
| 60 | 1.894242e+02  | 5.292924e+03  | 5.982124e+03  |
| 61 | -4.162279e+03 | -8.702804e+03 | -1.727649e+03 |
| 62 | -9.048725e+03 | -4.511943e+02 | 2.246797e+02  |
| 63 | 2.625159e+03  | -7.772499e+02 | -2.150280e+03 |
| 64 | 9.612030e+03  | -9.661628e+03 | -5.355124e+03 |
| 65 | -1.429063e+03 | -2.955514e+01 | 9.009695e+02  |
| 66 | -6.357787e+03 | -5.650997e+03 | -5.674962e+03 |
| 67 | 1.505436e+02  | -2.766797e+03 | -2.519650e+03 |

trajectory 9

| atom | VX            | VY           | VZ            |
|------|---------------|--------------|---------------|
| 1    | -1.492596e+01 | 2.288197e+02 | -2.125241e+01 |



|    |               |               |               |
|----|---------------|---------------|---------------|
| 2  | -8.080612e+02 | -6.590992e+02 | 6.842654e+01  |
| 3  | 2.155740e+02  | 2.941099e+02  | 6.722806e+02  |
| 4  | -3.061402e+02 | -7.967186e+02 | 4.649350e+02  |
| 5  | 1.274701e+03  | -1.002480e+03 | 1.757599e+02  |
| 6  | -3.404946e+03 | -1.218632e+03 | 4.291561e+02  |
| 7  | -7.022455e+03 | 5.159219e+03  | 2.718037e+03  |
| 8  | -7.179218e+03 | -1.000138e+03 | -2.446501e+02 |
| 9  | 1.302160e+03  | 4.211645e+02  | -9.656983e+02 |
| 10 | 1.473374e+03  | -5.656593e+02 | 8.846311e+02  |
| 11 | 1.079910e+03  | 6.875956e+02  | -3.712306e+02 |
| 12 | 1.899958e+03  | 5.954288e+03  | 2.321625e+03  |
| 13 | -5.462016e+03 | 4.336228e+03  | -7.851959e+03 |
| 14 | -5.224559e+02 | -9.890659e+01 | -4.003424e+02 |
| 15 | -5.061639e+02 | 2.293759e+02  | -4.780528e+02 |
| 16 | 1.819575e+03  | 8.887701e+02  | 4.116455e+02  |
| 17 | -1.051706e+02 | -2.279389e+02 | 3.092229e+02  |
| 18 | -1.025940e+03 | -1.218270e+02 | 1.980818e+02  |
| 19 | 7.824539e+02  | -1.105316e+03 | -4.477010e+02 |
| 20 | 1.318253e+03  | 7.599764e+02  | -1.859707e+02 |
| 21 | -1.033429e+03 | -3.614145e+02 | -2.287362e+02 |
| 22 | 5.677488e+02  | 2.356373e+03  | -7.778986e+02 |
| 23 | 1.293711e+01  | 4.895982e+01  | -2.651994e+02 |
| 24 | -3.667450e+02 | -5.609058e+02 | -5.300236e+02 |
| 25 | 1.296830e+03  | -1.034430e+03 | 9.510326e+02  |
| 26 | -1.800478e+02 | 3.424566e+02  | 3.301654e+02  |
| 27 | 4.161238e+02  | 2.132009e+02  | -2.284683e+03 |
| 28 | 2.085524e+03  | -1.402740e+03 | 2.099078e+02  |
| 29 | 3.027848e+01  | -1.814884e+02 | 1.294443e+03  |
| 30 | -1.473347e+03 | 3.790879e+02  | 1.560161e+02  |
| 31 | -7.209070e+02 | 9.569930e+01  | 7.608650e+02  |
| 32 | -8.446384e+02 | 2.597705e+02  | 7.477652e+02  |
| 33 | 7.634941e+02  | -7.029935e+03 | 5.214097e+03  |
| 34 | 2.275804e+03  | 2.426768e+02  | -3.529879e+03 |
| 35 | -3.769148e+03 | 2.244339e+03  | 9.427845e+03  |
| 36 | 6.941599e+03  | -6.495017e+02 | -1.207077e+03 |
| 37 | -1.032759e+02 | -1.312915e+03 | -6.064324e+03 |
| 38 | -9.484577e+03 | 5.083610e+03  | -1.210538e+03 |
| 39 | 2.136117e+03  | -4.542716e+03 | -2.570712e+03 |
| 40 | -4.408421e+03 | 4.429957e+03  | -5.371865e+03 |
| 41 | 4.724653e+02  | 2.267339e+03  | -1.371447e+03 |
| 42 | -2.262826e+02 | -1.721040e+03 | -9.443604e+02 |
| 43 | -4.756827e+01 | -9.123675e+02 | 7.901028e+02  |
| 44 | 5.270375e+02  | -3.469486e+02 | -1.199237e+03 |
| 45 | 4.027304e+02  | 1.045949e+03  | -9.080571e+02 |
| 46 | -3.819428e+02 | -2.600794e+01 | 5.179687e+02  |
| 47 | 4.697822e+02  | -1.838575e+03 | 7.781693e+03  |

|    |               |               |               |
|----|---------------|---------------|---------------|
| 48 | -1.330269e+02 | -3.754791e+03 | 1.274297e+03  |
| 49 | -9.497712e+03 | 6.877029e+03  | -8.606794e+02 |
| 50 | -9.730374e+02 | -3.557745e+03 | 2.310029e+03  |
| 51 | -2.962957e+03 | 5.401461e+02  | 1.262754e+03  |
| 52 | -1.322501e+03 | -2.398915e+02 | 7.762175e+02  |
| 53 | 9.276347e+02  | 4.954764e+02  | 4.981191e+02  |
| 54 | -1.379742e+03 | 2.579289e+02  | -2.077908e+02 |
| 55 | -9.343525e+00 | -9.067829e+02 | -3.545636e+01 |
| 56 | -1.619487e+03 | 5.184482e+03  | 2.633477e+03  |
| 57 | 2.866384e+03  | -3.409451e+03 | -9.537028e+03 |
| 58 | 3.375088e+03  | 4.051122e+03  | 1.939417e+03  |
| 59 | 1.179399e+03  | -2.813485e+03 | 2.846723e+03  |
| 60 | -4.022373e+03 | -7.427253e+03 | -5.953114e+03 |
| 61 | -2.695961e+03 | 5.213655e+03  | -3.643599e+03 |
| 62 | -4.902700e+03 | -2.358289e+03 | -1.685619e+03 |
| 63 | -5.445438e+02 | 1.319211e+03  | -1.072064e+03 |
| 64 | 1.085829e+04  | -8.532835e+02 | 8.783688e+03  |
| 65 | -4.874062e+03 | 3.737880e+03  | -5.414848e+03 |
| 66 | -4.225153e+03 | 9.061115e+02  | -1.685960e+03 |
| 67 | -5.017936e+03 | -3.763991e+03 | 4.378039e+03  |

trajectory 10

| atom | VX            | VY            | VZ            |
|------|---------------|---------------|---------------|
| 1    | 4.658361e+01  | 3.277665e+02  | 1.508525e+02  |
| 2    | -9.868245e+02 | 9.245570e+02  | -1.238733e+03 |
| 3    | 7.467764e+02  | -3.586816e+02 | 4.604506e+02  |
| 4    | -7.785583e+02 | 3.389727e+02  | 8.475553e+02  |
| 5    | -1.407662e+03 | 2.568894e+02  | -1.757681e+03 |
| 6    | 1.881520e+03  | 4.531421e+03  | -5.232620e+03 |
| 7    | 6.691341e+02  | 4.822324e+03  | 7.719598e+03  |
| 8    | -3.338445e+01 | -2.855475e+03 | 1.587809e+03  |
| 9    | -1.891446e+02 | 4.454938e+02  | -1.875557e+03 |
| 10   | 1.151738e+02  | -1.330758e+02 | 1.755148e+03  |
| 11   | 8.954026e+02  | 1.384817e+03  | -1.478635e+03 |
| 12   | 1.533145e+03  | 4.663450e+03  | -2.796667e+03 |
| 13   | -1.150788e+02 | 6.278758e+03  | -2.552120e+03 |
| 14   | -9.515208e+01 | -1.115527e+03 | 1.411883e+03  |
| 15   | -4.077607e+01 | 1.342025e+03  | 4.764598e+02  |
| 16   | -2.519036e+02 | -1.099750e+03 | -1.054228e+02 |
| 17   | -1.661150e+02 | -1.480200e+02 | -9.710202e+01 |
| 18   | -9.372130e+02 | -9.221774e+02 | 9.626826e+01  |
| 19   | 1.810307e+03  | 1.404218e+02  | 2.087793e+02  |
| 20   | 1.822550e+03  | 2.437932e+02  | -6.719030e+02 |
| 21   | 2.234285e+02  | -1.652033e+02 | -2.222466e+02 |

|    |               |               |               |
|----|---------------|---------------|---------------|
| 22 | 9.422716e+02  | -6.863012e+02 | 2.434338e+02  |
| 23 | 8.162820e+01  | -1.506843e+02 | -3.322026e+02 |
| 24 | -3.366578e+02 | 6.606764e+02  | 4.949627e+01  |
| 25 | -3.372187e+02 | -4.627446e+02 | -3.684158e+02 |
| 26 | 1.051586e+03  | 3.992368e+02  | -1.058228e+02 |
| 27 | 8.484238e+02  | 6.738237e+02  | 8.278429e+02  |
| 28 | -2.927042e+03 | -4.260976e+02 | -3.888407e+02 |
| 29 | -1.909982e+02 | -7.841328e+02 | 1.025909e+02  |
| 30 | 1.177610e+03  | 1.403874e+03  | -3.070276e+02 |
| 31 | 7.639715e+02  | 6.488116e+02  | 8.558783e+02  |
| 32 | -9.447678e+02 | -5.648803e+02 | -1.307866e+03 |
| 33 | 5.912128e+03  | -7.914889e+03 | 3.155217e+03  |
| 34 | 6.296141e+03  | -2.499813e+03 | -1.190072e+03 |
| 35 | 3.282099e+03  | -7.547061e+03 | -1.611373e+03 |
| 36 | 5.942742e+01  | -6.183587e+03 | -3.373343e+03 |
| 37 | 2.247879e+03  | -1.204399e+03 | 5.243134e+03  |
| 38 | 7.307697e+03  | 5.022166e+02  | -3.414758e+03 |
| 39 | -7.452468e+03 | 7.984840e+02  | -1.795724e+03 |
| 40 | -5.236412e+03 | 2.924809e+03  | 1.186554e+03  |
| 41 | -3.191263e+02 | 1.121826e+02  | 1.225472e+03  |
| 42 | 5.792008e+02  | 2.031415e+03  | -4.150596e+02 |
| 43 | 2.510187e+02  | -3.081855e+02 | -1.222165e+02 |
| 44 | -6.858949e+02 | 1.042078e+03  | 1.079979e+03  |
| 45 | -3.831955e+02 | -4.006428e+01 | 1.214605e+02  |
| 46 | -1.095505e+03 | -3.546479e+03 | -3.529348e+02 |
| 47 | -1.750288e+03 | -7.160965e+03 | 3.353712e+03  |
| 48 | -4.859539e+03 | 3.750636e+03  | 1.293420e+03  |
| 49 | 4.374504e+03  | -6.863118e+03 | 3.352874e+03  |
| 50 | 7.243564e+01  | -2.576552e+03 | 3.039897e+03  |
| 51 | 1.282086e+03  | -5.595629e+03 | 8.678401e+03  |
| 52 | -6.350281e+02 | 1.971833e+03  | -2.685564e+02 |
| 53 | -1.151497e+03 | -1.336570e+02 | 5.701250e+01  |
| 54 | -9.355719e+02 | -1.061357e+03 | 1.912817e+02  |
| 55 | 2.595525e+03  | -1.884202e+02 | 6.137635e+02  |
| 56 | -2.663871e+03 | -1.293767e+03 | -2.878320e+03 |
| 57 | 6.146417e+02  | -9.388731e+03 | 1.734680e+03  |
| 58 | -1.786986e+03 | -8.268397e+03 | 3.066988e+03  |
| 59 | 1.582089e+03  | -3.212312e+03 | -1.197597e+03 |
| 60 | 4.911772e+03  | 1.010205e+04  | 2.100599e+03  |
| 61 | 3.750922e+03  | -2.584050e+03 | 1.433863e+02  |
| 62 | 1.616590e+03  | 2.223053e+03  | 4.128772e+02  |
| 63 | 8.716818e+03  | 2.568508e+03  | -2.531530e+03 |
| 64 | -5.201470e+03 | 1.676082e+02  | -6.422998e+03 |
| 65 | -1.761789e+03 | -2.652813e+03 | 3.328779e+02  |
| 66 | -6.225419e+03 | -2.799635e+03 | -3.920486e+03 |
| 67 | -5.520286e+02 | 2.025420e+03  | -1.093865e+03 |

trajectory 11

| atom | VX            | VY            | VZ            |
|------|---------------|---------------|---------------|
| 1    | -2.258501e+02 | 4.997359e+01  | 3.420953e+02  |
| 2    | 7.149387e+02  | 6.292400e+02  | -1.000267e+03 |
| 3    | 6.909198e+02  | -2.584309e+03 | 1.801966e+03  |
| 4    | -8.174656e+02 | 5.805536e+02  | -3.406757e+02 |
| 5    | -6.094962e+01 | 4.890621e+02  | -1.814261e+03 |
| 6    | -2.306142e+03 | 3.828732e+03  | -1.729947e+03 |
| 7    | 3.346638e+03  | 1.884115e+03  | 2.850603e+03  |
| 8    | 9.549755e+03  | -5.819145e+02 | 5.118699e+03  |
| 9    | -6.913545e+02 | 1.015009e+03  | -2.981879e+02 |
| 10   | 1.477719e+03  | -1.226308e+02 | -5.393292e+02 |
| 11   | 5.731721e+02  | 7.794403e+02  | 1.062870e+03  |
| 12   | 6.213973e+03  | -5.452583e+03 | -2.260172e+03 |
| 13   | -5.115434e+03 | -7.036864e+03 | 5.108732e+03  |
| 14   | -9.589378e+02 | 5.309428e+02  | -4.956745e+02 |
| 15   | -2.676841e+02 | -1.274761e+02 | -1.543019e+03 |
| 16   | 1.391472e+03  | 7.904962e+02  | -1.685465e+01 |
| 17   | -1.779684e+02 | 2.361787e+02  | -1.353943e+02 |
| 18   | -2.291441e+00 | -2.153730e+01 | -1.556920e+01 |
| 19   | 2.097646e+03  | -8.703533e+01 | 5.777873e+02  |
| 20   | -1.544441e+03 | -1.109402e+03 | 4.961855e+02  |
| 21   | 4.184482e+02  | -3.198154e+02 | -1.690182e+02 |
| 22   | 1.023280e+03  | -1.393136e+03 | -2.165514e+02 |
| 23   | -5.864466e+02 | 2.668523e+01  | 1.419612e+03  |
| 24   | -1.130936e+03 | -3.209936e+02 | 1.788667e+02  |
| 25   | -7.384510e+01 | 2.439084e+02  | -6.084382e+02 |
| 26   | 5.451749e+02  | 2.337708e+02  | -1.344001e+03 |
| 27   | -1.835526e+03 | 3.831926e+02  | 5.796095e+02  |
| 28   | 1.043860e+03  | 6.912824e+00  | -5.551415e+02 |
| 29   | 1.174304e+03  | -8.760940e+02 | 2.101783e+02  |
| 30   | -2.052294e+02 | 1.252039e+03  | -3.107053e+02 |
| 31   | -1.340581e+02 | -5.207130e+02 | 7.940315e+02  |
| 32   | -5.515163e+02 | -1.171274e+03 | -1.122615e+03 |
| 33   | 2.734742e+03  | 4.926259e+03  | -2.556950e+03 |
| 34   | 7.519613e+03  | 6.070353e+03  | 2.518998e+03  |
| 35   | -4.591417e+03 | 3.007961e+03  | 1.344738e+03  |
| 36   | -5.030585e+03 | 1.671598e+03  | -6.487149e+03 |
| 37   | -2.569367e+03 | 5.907937e+03  | 1.008351e+01  |
| 38   | -1.251525e+03 | -7.331817e+03 | 1.914567e+03  |
| 39   | 3.386703e+03  | 2.461735e+03  | -2.874439e+03 |
| 40   | 3.844985e+03  | -1.221277e+02 | -3.081569e+03 |
| 41   | 6.302731e+02  | 3.723409e+02  | -9.064169e+01 |

|    |               |               |               |
|----|---------------|---------------|---------------|
| 42 | -1.003042e+03 | 7.809619e+02  | 1.313897e+03  |
| 43 | 9.369459e+02  | -8.621682e+02 | -7.916581e+02 |
| 44 | 4.965425e+02  | 1.487673e+03  | -5.685452e+02 |
| 45 | -1.021103e+00 | -7.017775e+02 | 5.385659e+02  |
| 46 | 1.217293e+03  | -1.827935e+03 | -1.672225e+02 |
| 47 | 6.198575e+02  | 2.819848e+03  | -5.573610e+03 |
| 48 | -2.722491e+03 | 4.824407e+03  | -9.413282e+02 |
| 49 | 5.126803e+03  | 1.659902e+03  | -4.933673e+03 |
| 50 | -1.797588e+03 | -2.196360e+03 | 1.877200e+03  |
| 51 | -7.908388e+03 | -4.815755e+03 | 6.678206e+03  |
| 52 | 5.901451e+01  | -4.543990e+02 | -1.858549e+03 |
| 53 | -8.238023e+02 | -3.614302e+02 | -6.432351e+02 |
| 54 | -3.369978e+02 | -1.924288e+03 | 2.654086e+02  |
| 55 | 5.246143e+02  | 1.358556e+03  | 2.342137e+03  |
| 56 | -1.673132e+03 | 2.022017e+03  | 6.072271e+03  |
| 57 | -5.099617e+03 | -4.902571e+03 | 2.442815e+03  |
| 58 | -4.462443e+03 | 2.755874e+02  | 8.313840e+03  |
| 59 | -5.182651e+03 | -8.175708e+02 | 2.240288e+03  |
| 60 | 2.507078e+03  | 8.840641e+02  | 1.832066e+03  |
| 61 | 7.580344e+03  | 7.188727e+03  | -1.410508e+03 |
| 62 | 2.081876e+03  | 1.805768e+03  | -3.851199e+02 |
| 63 | 6.981939e+03  | 6.811537e+03  | -7.174531e+02 |
| 64 | -1.028923e+03 | 5.858130e+03  | -7.647396e+01 |
| 65 | -3.116289e+02 | -9.950505e+03 | 2.124870e+03  |
| 66 | -1.898738e+02 | -3.543097e+03 | -1.422310e+03 |
| 67 | -3.152110e+03 | -6.387997e+03 | 8.575885e+01  |

trajectory 12

| atom | VX            | VY            | VZ            |
|------|---------------|---------------|---------------|
| 1    | 2.200781e+02  | 2.581645e+02  | -4.209606e+02 |
| 2    | 3.264813e+01  | -1.037455e+03 | -1.195722e+02 |
| 3    | 1.995678e+02  | 7.438632e+02  | -6.631179e+02 |
| 4    | 1.142492e+03  | -4.510055e+02 | -1.519381e+03 |
| 5    | 1.958033e+02  | 4.159665e+02  | 1.341201e+03  |
| 6    | 3.864571e+03  | 5.699331e+02  | 2.349055e+03  |
| 7    | 2.043817e+03  | 1.483070e+03  | -4.425273e+03 |
| 8    | -5.762417e+03 | -2.852215e+03 | -6.437322e+03 |
| 9    | -4.248517e+02 | 5.551843e+02  | 1.546742e+03  |
| 10   | 1.317156e+03  | -1.647258e+03 | 2.260380e+03  |
| 11   | -1.449911e+02 | -1.088454e+02 | 7.185723e+02  |
| 12   | 4.981025e+03  | 9.347449e+02  | -2.608898e+03 |
| 13   | 2.227899e+03  | 8.594099e+03  | 6.832727e+02  |
| 14   | -5.717547e+02 | -1.120994e+03 | 7.067701e+01  |
| 15   | 1.135710e+03  | 8.251367e+01  | 1.644662e+03  |

|    |               |               |               |
|----|---------------|---------------|---------------|
| 16 | -2.015687e+02 | -2.705543e+02 | -4.964203e+02 |
| 17 | 6.631738e+01  | -2.048059e+02 | -1.751131e+02 |
| 18 | -1.480747e+02 | 1.121994e+03  | 1.375108e+03  |
| 19 | 1.109323e+03  | 4.602465e+02  | -6.995634e+02 |
| 20 | -8.957393e+02 | -3.559804e+02 | -2.687914e+02 |
| 21 | 1.356108e+03  | 3.627560e+02  | 1.517419e+02  |
| 22 | 2.184547e+02  | -8.601199e+02 | 4.640279e+02  |
| 23 | -1.766385e+03 | 2.403222e+00  | -1.803525e+02 |
| 24 | -3.902132e+02 | -2.518255e+02 | -1.195737e+03 |
| 25 | -8.838910e+01 | 1.057821e+03  | 8.897421e+02  |
| 26 | 7.395046e+02  | 8.338178e+02  | 6.531773e+02  |
| 27 | 1.067363e+02  | 2.470866e+03  | 5.561805e+01  |
| 28 | -7.564615e+02 | -9.547612e+02 | 5.019532e+02  |
| 29 | 2.386572e+02  | -3.138035e+01 | 1.463077e+03  |
| 30 | -2.181729e+03 | 6.426383e+02  | -1.062859e+03 |
| 31 | -1.660174e+03 | -6.306657e+02 | -1.513221e+03 |
| 32 | 1.330101e+03  | -2.168513e+03 | 8.330689e+02  |
| 33 | -6.949242e+03 | 2.167849e+03  | -6.001448e+03 |
| 34 | -5.342897e+03 | 2.037416e+03  | 6.349782e+03  |
| 35 | 5.605624e+02  | -1.133467e+03 | -3.839740e+03 |
| 36 | -6.519507e+01 | 4.042688e+03  | 6.625895e+03  |
| 37 | -1.965713e+02 | -2.265608e+03 | 2.768235e+03  |
| 38 | 4.861486e+03  | 5.685684e+03  | -8.757487e+03 |
| 39 | -1.540456e+03 | 2.552667e+02  | -1.475759e+03 |
| 40 | -6.986415e+01 | -9.833455e+03 | 1.109532e+03  |
| 41 | 6.714035e+02  | -6.798698e+01 | -7.507384e+02 |
| 42 | 3.990067e+02  | 1.400452e+01  | -9.517692e+02 |
| 43 | 1.696842e+02  | 1.481914e+02  | 3.736216e+02  |
| 44 | -2.146704e+02 | 6.866004e+00  | -3.638076e+02 |
| 45 | -8.235642e+02 | 1.825546e+02  | -2.838347e+02 |
| 46 | -2.560630e+03 | 4.849982e+02  | -4.448957e+02 |
| 47 | -2.941026e+03 | -3.514000e+03 | -8.144535e+02 |
| 48 | 7.845487e+03  | 9.677444e+02  | 2.797402e+03  |
| 49 | 4.280711e+03  | -1.346812e+03 | -1.402513e+03 |
| 50 | -1.149753e+03 | -3.648490e+03 | 1.429850e+03  |
| 51 | 1.010676e+04  | -4.228738e+03 | -4.422110e+03 |
| 52 | 1.907975e+02  | 4.455142e+02  | 2.218806e+03  |
| 53 | -5.841144e+02 | -1.385913e+03 | 2.372923e+02  |
| 54 | -7.030630e+02 | 1.017845e+03  | 7.139200e+02  |
| 55 | -3.589256e+02 | 9.732393e+02  | -7.362349e+02 |
| 56 | -1.614318e+03 | 4.284204e+03  | -4.785596e+03 |
| 57 | -2.084955e+03 | -7.526699e+03 | -2.395755e+03 |
| 58 | -4.145320e+03 | -7.987381e+03 | 1.815220e+03  |
| 59 | 3.839712e+03  | 2.126631e+03  | 1.108775e+03  |
| 60 | -3.305563e+03 | 1.076509e+04  | -8.365536e+02 |
| 61 | 2.481621e+03  | -1.903549e+03 | 3.331812e+03  |

|    |               |               |               |
|----|---------------|---------------|---------------|
| 62 | 2.034735e+03  | -4.685874e+03 | 6.316696e+03  |
| 63 | 4.867335e+03  | 3.394555e+03  | -4.444837e+03 |
| 64 | 1.267886e+03  | -4.249369e+03 | -1.554016e+03 |
| 65 | 3.526689e+03  | -6.865129e+03 | 3.478477e+03  |
| 66 | -7.752027e+02 | -1.284369e+03 | -4.245724e+03 |
| 67 | -7.715549e+02 | 8.039586e+02  | 4.007541e+03  |

trajectory 13

| atom | VX            | VY            | VZ            |
|------|---------------|---------------|---------------|
| 1    | -7.182850e+01 | -2.312884e+00 | 1.197920e+02  |
| 2    | -1.975186e+02 | 1.653836e+03  | 9.639733e+02  |
| 3    | -3.642815e+02 | -1.717437e+03 | 1.163006e+03  |
| 4    | 8.421185e+02  | -4.484612e+02 | -3.726895e+02 |
| 5    | -1.125526e+03 | 4.791599e+02  | 4.591995e+02  |
| 6    | 3.024097e+03  | -4.838488e+03 | -6.222249e+03 |
| 7    | -3.136721e+03 | 6.467493e+03  | 6.217712e+03  |
| 8    | 1.127359e+03  | 2.409333e+03  | -2.408282e+02 |
| 9    | -8.704077e+02 | 1.219753e+02  | -1.136174e+03 |
| 10   | -9.936538e+02 | 3.479320e+02  | 4.933768e+02  |
| 11   | 9.293275e+02  | 1.411066e+03  | -1.821112e+03 |
| 12   | -6.519030e+03 | -5.007427e+03 | 1.272465e+03  |
| 13   | -8.614229e+03 | 4.141838e+03  | -9.994799e+02 |
| 14   | -3.156796e+02 | -1.345533e+02 | 2.383353e+02  |
| 15   | 8.691889e+02  | 6.558740e+02  | 8.255483e+02  |
| 16   | -3.058091e+02 | -1.453602e+00 | -1.329464e+03 |
| 17   | 2.068764e+02  | 3.710955e+02  | -5.602491e+00 |
| 18   | 1.480056e+03  | -1.781084e+02 | 7.493264e+02  |
| 19   | 1.196680e+03  | -1.451604e+03 | 1.004435e+03  |
| 20   | -2.850229e+02 | 8.795297e+02  | -3.572302e+02 |
| 21   | -4.615621e+01 | -5.470836e+02 | 8.517416e+02  |
| 22   | 1.537148e+03  | 4.202713e+02  | -2.224459e+03 |
| 23   | -4.506360e+02 | -7.497485e+02 | 7.684487e+02  |
| 24   | 1.970994e+02  | -6.082468e+02 | 3.036136e+02  |
| 25   | -2.614411e+02 | 9.949609e+01  | 1.305865e+02  |
| 26   | 2.061027e+02  | -1.416205e+02 | 1.385923e+02  |
| 27   | 1.494519e+03  | -5.205613e+02 | -2.850734e+02 |
| 28   | -4.768532e+02 | 4.819070e+01  | 8.335225e+00  |
| 29   | -1.053345e+03 | 1.023212e+03  | -1.385969e+03 |
| 30   | -1.240346e+03 | -2.595869e+02 | 1.181614e+03  |
| 31   | 8.905528e+02  | -3.456881e+02 | 1.551804e+03  |
| 32   | -1.331811e+03 | 8.067145e+02  | -1.762197e+03 |
| 33   | 6.503070e+03  | -3.712864e+03 | 4.101816e+03  |
| 34   | 3.839288e+03  | 1.341976e+03  | -2.395562e+03 |
| 35   | 6.520098e+02  | -3.527405e+03 | -7.148911e+03 |

|    |               |               |               |
|----|---------------|---------------|---------------|
| 36 | -5.785303e+03 | -2.716409e+03 | 1.053708e+02  |
| 37 | 8.297499e+03  | -3.307117e+03 | 4.466672e+03  |
| 38 | 4.914580e+02  | -4.566094e+02 | 4.279196e+03  |
| 39 | 3.352695e+03  | -1.395446e+03 | 3.132674e+03  |
| 40 | -2.612209e+03 | 4.610853e+03  | 2.881185e+03  |
| 41 | 4.614494e+01  | -5.401321e+02 | -7.070341e+01 |
| 42 | -1.427230e+03 | 2.442042e+02  | 3.828703e+02  |
| 43 | -6.706166e+02 | -5.240768e+01 | 8.089900e+02  |
| 44 | 1.554399e+03  | -4.544161e+02 | 2.428178e+02  |
| 45 | 7.276589e+02  | -1.229910e+03 | 6.359434e+02  |
| 46 | 1.030630e+03  | -2.083955e+01 | -1.313285e+03 |
| 47 | 1.053957e+03  | 6.698860e+03  | -3.707762e+03 |
| 48 | -2.030728e+03 | -5.521285e+03 | 2.344565e+03  |
| 49 | -5.850794e+03 | 5.412844e+03  | -5.221601e+03 |
| 50 | 2.881741e+03  | -4.615151e+03 | 1.205605e+03  |
| 51 | -4.542261e+03 | -3.801588e+03 | -1.846783e+03 |
| 52 | -8.401804e+02 | 9.472311e+02  | -3.096719e+02 |
| 53 | -1.161613e+03 | 2.628366e+02  | -1.253531e+01 |
| 54 | 1.876823e+02  | -8.228237e+02 | -5.575327e+02 |
| 55 | -5.219992e+02 | -1.618321e+03 | -7.727227e+02 |
| 56 | -9.820129e+03 | -8.019335e+03 | -1.818347e+03 |
| 57 | -2.297840e+03 | 2.345134e+03  | -1.945589e+03 |
| 58 | 4.468965e+03  | -2.346070e+03 | 4.742637e+03  |
| 59 | 1.081972e+04  | 4.197592e+03  | -4.686127e+03 |
| 60 | 9.556310e+02  | 1.012530e+03  | 3.355398e+02  |
| 61 | 2.181328e+03  | -7.084262e+02 | -2.287817e+03 |
| 62 | -1.524654e+03 | -5.418945e+01 | -2.541469e+03 |
| 63 | 3.627505e+03  | 1.068798e+04  | 3.194850e+03  |
| 64 | -1.876209e+03 | 2.775711e+03  | -2.667314e+03 |
| 65 | 3.468416e+03  | 1.121477e+03  | 4.588884e+03  |
| 66 | -1.197239e+04 | -1.625972e+02 | -3.645347e+03 |
| 67 | 3.183116e+03  | -4.453089e+03 | 3.076662e+03  |

trajectory 14

| atom | VX            | VY            | VZ            |
|------|---------------|---------------|---------------|
| 1    | -8.770549e+01 | 1.949766e+02  | -1.677107e+02 |
| 2    | 6.536492e+02  | 4.020648e+02  | 2.645035e+02  |
| 3    | -4.720900e+02 | 5.420230e+02  | 9.614178e+02  |
| 4    | 1.179741e+03  | 1.080821e+03  | 1.230419e+03  |
| 5    | -1.365846e+03 | 4.270773e+02  | 5.114867e+02  |
| 6    | 9.891145e+03  | -8.775828e+02 | -3.854987e+03 |
| 7    | -1.410467e+03 | -3.921450e+03 | 1.153925e+03  |
| 8    | -5.203878e+03 | 2.585763e+03  | 3.390051e+03  |
| 9    | 6.929478e+02  | -2.129422e+02 | -1.097059e+03 |



|    |               |               |               |
|----|---------------|---------------|---------------|
| 10 | -4.430789e+02 | -1.952253e+03 | -4.833159e+02 |
| 11 | -4.655482e+02 | 1.378578e+02  | 2.755091e+02  |
| 12 | 4.094768e+03  | -3.905098e+03 | 1.276362e+03  |
| 13 | -1.082516e+03 | -7.516764e+03 | 7.548331e+03  |
| 14 | -3.756130e+02 | -1.838839e+03 | 4.827079e+02  |
| 15 | 6.019457e+02  | 9.391653e+02  | 1.875504e+01  |
| 16 | 8.191317e+02  | 4.597030e+02  | -9.101243e+02 |
| 17 | -1.107632e+02 | 8.636470e+01  | 1.537337e+02  |
| 18 | 4.435574e+02  | -6.528251e+02 | -1.179866e+03 |
| 19 | -9.277588e+02 | -9.960783e+01 | -6.694550e+02 |
| 20 | -3.096915e+02 | -2.620492e+02 | 1.154708e+03  |
| 21 | -9.093491e+02 | -1.035824e+03 | -5.261075e+02 |
| 22 | -8.132337e+01 | 9.434754e+01  | -6.685340e+02 |
| 23 | 8.490217e+02  | -7.325650e+02 | -1.282436e+02 |
| 24 | 2.104676e+02  | 8.243282e+02  | 7.857993e+02  |
| 25 | 2.083769e+03  | 1.369136e+03  | 5.534518e+02  |
| 26 | -4.674724e+01 | -9.729701e+02 | -8.784579e+02 |
| 27 | -1.555172e+02 | 6.843422e+02  | 1.812819e+02  |
| 28 | -1.522570e+03 | -6.513206e+02 | 5.719349e+02  |
| 29 | 1.611270e+03  | 8.305679e+02  | -1.140371e+03 |
| 30 | -2.632441e+02 | 4.609078e+02  | 4.647009e+02  |
| 31 | 1.962732e+02  | 1.917489e+02  | -4.720088e+02 |
| 32 | -1.747976e+02 | -9.297718e+02 | 1.363295e+03  |
| 33 | 6.519864e+02  | 3.995687e+03  | -5.829557e+03 |
| 34 | -6.634313e+03 | 1.551023e+03  | -1.978903e+03 |
| 35 | -1.079828e+04 | 4.284785e+03  | 1.197014e+03  |
| 36 | -6.051010e+02 | -2.167248e+03 | 7.027652e+03  |
| 37 | -1.811758e+03 | -3.717629e+03 | -3.058807e+03 |
| 38 | 5.999810e+03  | 7.192058e+03  | 3.750406e+02  |
| 39 | 1.894043e+03  | -9.865925e+02 | 7.252740e+02  |
| 40 | 3.451360e+03  | -2.123811e+03 | -4.372343e+03 |
| 41 | -6.331546e+02 | -7.454989e+02 | -7.826919e+01 |
| 42 | 2.043291e+03  | -1.004612e+03 | -2.735957e+02 |
| 43 | -1.166243e+03 | 1.745137e+03  | 4.572783e+02  |
| 44 | 1.901251e+03  | -3.751935e+02 | -6.158229e+02 |
| 45 | -1.798804e+02 | -8.498078e+02 | -6.098076e+02 |
| 46 | -1.494212e+03 | 5.367410e+02  | -3.006643e+02 |
| 47 | -2.172709e+03 | 3.460636e+03  | -3.802536e+03 |
| 48 | 2.475381e+03  | -5.990188e+03 | 1.414488e+03  |
| 49 | 6.848299e+02  | 5.090058e+03  | 1.580708e+03  |
| 50 | 5.038691e+03  | 6.405567e+03  | -1.176935e+04 |
| 51 | -2.281235e+03 | -3.777032e+03 | 1.096916e+03  |
| 52 | 2.944485e+02  | 2.649923e+01  | 9.196157e+02  |
| 53 | -7.263309e+02 | 5.566339e+02  | 2.378183e+02  |
| 54 | -9.705563e+02 | -1.047255e+03 | 5.383711e+02  |
| 55 | -1.153837e+02 | -1.792828e+01 | 5.977368e+02  |

|    |               |               |               |
|----|---------------|---------------|---------------|
| 56 | 4.972440e+03  | 3.875874e+03  | -2.477526e+02 |
| 57 | 3.943626e+03  | 2.434907e+03  | 2.755602e+03  |
| 58 | -1.419155e+04 | 9.471469e+02  | 8.916786e+02  |
| 59 | -2.717113e+03 | 9.181503e+03  | 2.552683e+03  |
| 60 | 2.730432e+02  | -9.812027e+03 | -1.849040e+03 |
| 61 | -5.788220e+03 | 4.680130e+03  | 1.568265e+03  |
| 62 | 2.897082e+03  | 1.626934e+03  | 1.416464e+03  |
| 63 | 1.839479e+03  | -4.226708e+03 | -2.411167e+03 |
| 64 | 8.876539e+03  | -2.977530e+03 | 1.026937e+03  |
| 65 | -5.636467e+03 | 6.865484e+03  | -5.979762e+03 |
| 66 | 3.931057e+03  | -3.029799e+03 | 1.610044e+03  |
| 67 | 2.590969e+02  | 4.748717e+01  | -6.116712e+03 |

trajectory 15

| atom | VX            | VY            | VZ            |
|------|---------------|---------------|---------------|
| 1    | -4.524173e+02 | 1.556059e+02  | 4.057014e+02  |
| 2    | -9.999211e+02 | 1.411747e+02  | -1.215380e+03 |
| 3    | 8.116881e+02  | -2.159800e+03 | 1.010009e+03  |
| 4    | -3.376138e+02 | 3.904086e+02  | -3.147688e+02 |
| 5    | 2.580493e+02  | 1.641596e+03  | 4.818994e+02  |
| 6    | 1.211332e+03  | 2.179470e+03  | -3.540323e+03 |
| 7    | -2.617161e+03 | -9.147100e+03 | -1.462442e+03 |
| 8    | 6.034109e+03  | 3.718264e+03  | 3.410715e+03  |
| 9    | 2.472417e+02  | 6.524102e+01  | -8.105286e+02 |
| 10   | -2.147867e+02 | 9.159879e+02  | -9.451764e+01 |
| 11   | 1.959046e+03  | -2.539955e+02 | -6.349503e+02 |
| 12   | -1.910958e+03 | -4.531622e+03 | 8.044679e+03  |
| 13   | 1.407934e+03  | 4.075297e+03  | -1.699474e+03 |
| 14   | 1.102998e+03  | -7.810150e+02 | -2.418496e+02 |
| 15   | -1.926078e+03 | -1.088403e+03 | 1.648342e+02  |
| 16   | 4.023652e+02  | 6.984860e+02  | -4.932115e+02 |
| 17   | -9.119550e+01 | -3.237523e+02 | -2.481729e+01 |
| 18   | -8.825499e+02 | -1.485983e+03 | 2.499352e+02  |
| 19   | -1.122443e+03 | -1.461615e+03 | 8.965079e+02  |
| 20   | 5.437119e+02  | 2.007958e+02  | 1.444474e+02  |
| 21   | 5.517066e+02  | 7.248938e+02  | -5.119351e+02 |
| 22   | 1.150426e+03  | 1.222626e+03  | -1.330499e+02 |
| 23   | -6.743053e+02 | -1.945613e+02 | 5.862044e+02  |
| 24   | 2.557215e+02  | 8.259813e+02  | 5.765022e+02  |
| 25   | -2.859456e+02 | -4.866967e+02 | -1.547283e+03 |
| 26   | 1.029622e+03  | 4.929104e+02  | -8.286863e+00 |
| 27   | 1.630891e+02  | 9.332325e+02  | 2.076934e+02  |
| 28   | 1.429404e+03  | 4.279254e+02  | -1.317609e+03 |
| 29   | -1.604432e+02 | 1.411595e+02  | -9.736930e+02 |

|    |               |               |               |
|----|---------------|---------------|---------------|
| 30 | -3.137293e+02 | -1.874807e+02 | -6.080806e+02 |
| 31 | -1.933138e+03 | 9.556559e+02  | -8.186160e+02 |
| 32 | 1.052671e+03  | 4.745427e+01  | -2.773681e+02 |
| 33 | 7.632623e+03  | 4.245599e+03  | -3.465098e+03 |
| 34 | 7.484880e+03  | 2.674200e+03  | 4.461664e+02  |
| 35 | -8.644467e+03 | 3.630716e+01  | 5.756815e+03  |
| 36 | 2.476952e+03  | -4.778730e+02 | 3.220632e+03  |
| 37 | 2.166435e+03  | -1.313283e+03 | 1.093970e+04  |
| 38 | -1.195430e+03 | -2.843502e+03 | 4.266102e+03  |
| 39 | -3.083376e+03 | -3.393900e+03 | -2.730854e+03 |
| 40 | 2.803582e+03  | -3.888959e+03 | -1.509620e+03 |
| 41 | -1.168559e+03 | 1.653708e+03  | -5.169703e+02 |
| 42 | -1.931690e+03 | 3.582399e+02  | 7.720081e+02  |
| 43 | 1.388760e+03  | -4.983070e+02 | 7.037158e+02  |
| 44 | 3.678232e+02  | 2.263896e+02  | 2.049523e+02  |
| 45 | 1.591639e+03  | -1.081395e+03 | -5.806906e+02 |
| 46 | 8.301260e+02  | -1.737331e+03 | -1.207974e+02 |
| 47 | 1.822431e+03  | 4.095111e+03  | 2.161783e+03  |
| 48 | -3.832039e+03 | -1.099821e+03 | 4.414377e+03  |
| 49 | 1.776258e+03  | -4.884066e+03 | 2.740117e+03  |
| 50 | 5.099895e+03  | 1.122812e+04  | -3.160386e+03 |
| 51 | 3.928058e+03  | -2.041836e+03 | -4.400832e+03 |
| 52 | -2.380490e+02 | -1.774659e+01 | -7.774525e+02 |
| 53 | -1.237500e+03 | -1.886590e+02 | -1.262943e+03 |
| 54 | -2.720620e+02 | 2.169578e+02  | 6.193416e+02  |
| 55 | -8.815268e+02 | -3.368686e+02 | -5.512962e+02 |
| 56 | -1.064087e+03 | 6.625801e+03  | 3.726873e+03  |
| 57 | -6.771007e+03 | 6.670604e+03  | 1.939552e+03  |
| 58 | 3.132687e+03  | 2.207617e+03  | -4.331530e+03 |
| 59 | 2.448181e+03  | -6.644034e+03 | 6.723376e+03  |
| 60 | 1.181541e+03  | -9.765721e+01 | 3.095375e+03  |
| 61 | 6.028091e+03  | 4.533067e+03  | 3.734956e+03  |
| 62 | -4.530894e+02 | -9.839941e+02 | 1.388803e+03  |
| 63 | -7.439993e+03 | -5.068314e+03 | -2.273572e+03 |
| 64 | 4.671830e+03  | 1.577920e+03  | 3.238149e+03  |
| 65 | 3.409750e+03  | 5.030518e+03  | 8.400174e+03  |
| 66 | 1.071091e+04  | -4.637300e+01 | 4.948093e+02  |
| 67 | 1.576732e+03  | -2.815869e+03 | 4.730635e+02  |

trajectory 16

| atom | VX            | VY            | VZ            |
|------|---------------|---------------|---------------|
| 1    | -1.681627e+02 | -2.860588e+02 | 2.931017e+02  |
| 2    | -9.576077e+02 | 4.941060e+02  | -4.398044e+01 |
| 3    | 2.231892e+02  | 4.435489e+02  | -1.144262e+03 |

|    |               |               |               |
|----|---------------|---------------|---------------|
| 4  | -1.080810e+02 | -1.318920e+03 | -6.657647e+02 |
| 5  | 4.043276e+02  | -4.154394e+00 | -8.208462e+01 |
| 6  | -3.618374e+03 | -2.800043e+03 | 2.439931e+03  |
| 7  | 3.984238e+03  | -1.066781e+04 | 6.462692e+02  |
| 8  | 1.468072e+03  | 3.018956e+03  | -7.280867e+03 |
| 9  | -2.470821e+02 | 1.399341e+03  | 7.263382e+02  |
| 10 | 2.175351e+02  | 2.385443e+02  | -7.474637e+02 |
| 11 | 8.495731e+02  | 1.629305e+03  | -8.712340e+02 |
| 12 | -6.676027e+03 | -4.970567e+03 | 4.318266e+03  |
| 13 | 3.274026e+03  | -7.632654e+02 | -8.532132e+03 |
| 14 | -8.087258e+02 | 6.809128e+02  | 6.159746e+02  |
| 15 | 4.498669e+02  | -2.938419e+02 | -2.614015e+02 |
| 16 | -4.417480e+02 | 7.747136e+02  | 4.367675e+02  |
| 17 | 2.930583e+02  | -7.727361e+01 | 2.045272e+02  |
| 18 | 2.937309e+02  | -3.357238e+02 | -6.244235e+01 |
| 19 | 2.718551e+02  | 1.784056e+03  | -1.011535e+03 |
| 20 | -5.721595e+02 | 3.141498e+01  | -9.293675e+01 |
| 21 | 1.159592e+03  | 5.593346e+02  | 7.454180e+01  |
| 22 | -3.714707e+02 | -7.077825e+02 | -7.289311e+02 |
| 23 | 1.109432e+02  | -2.413714e+02 | 7.296445e+02  |
| 24 | 9.729610e+02  | 1.205609e+03  | -1.288820e+03 |
| 25 | -1.795220e+03 | -5.169588e+02 | -1.344766e+03 |
| 26 | -9.254228e+02 | 2.555025e+02  | -4.843620e+02 |
| 27 | -3.061076e+02 | 5.428051e+02  | 4.436480e+02  |
| 28 | -8.982010e+02 | -1.428066e+03 | 1.455300e+03  |
| 29 | -3.496222e+02 | 1.916333e+03  | -4.891394e+02 |
| 30 | 3.511555e+02  | -1.569404e+03 | 1.332816e+03  |
| 31 | -6.979095e+02 | 1.787511e+03  | 4.464828e+02  |
| 32 | -1.131689e+03 | -2.985352e+02 | 3.605919e+02  |
| 33 | 7.542166e-01  | -1.058743e+04 | -3.066258e+02 |
| 34 | 3.603901e+03  | 1.716730e+03  | 4.882521e+02  |
| 35 | 7.165940e+02  | -8.902602e+03 | -2.769067e+03 |
| 36 | -2.079267e+03 | 2.367891e+03  | -3.151341e+03 |
| 37 | -4.832159e+03 | -4.373169e+03 | -1.999604e+03 |
| 38 | 2.078848e+03  | 1.835933e+03  | -2.102260e+03 |
| 39 | 2.856847e+03  | -3.700591e+03 | -2.020005e+03 |
| 40 | 9.642569e+03  | 5.469340e+02  | -2.239973e+03 |
| 41 | -9.998036e+02 | -1.840945e+03 | -4.664150e+02 |
| 42 | 8.695600e+02  | 7.995601e+02  | 3.967457e+02  |
| 43 | 1.297692e+03  | 8.611099e+02  | 8.516038e+02  |
| 44 | -5.939391e+00 | 7.059038e+02  | -9.893162e+02 |
| 45 | -1.686625e+03 | 7.104676e+02  | 8.316361e+01  |
| 46 | -3.843582e+02 | -6.052046e+02 | -3.370629e+02 |
| 47 | 7.617696e+02  | -6.229936e+03 | 1.770949e+03  |
| 48 | 6.986823e+03  | 2.676137e+03  | 2.348906e+03  |
| 49 | 5.506982e+03  | -8.912813e+03 | 4.234458e+03  |

|    |               |               |               |
|----|---------------|---------------|---------------|
| 50 | 4.650140e+03  | 2.414465e+03  | -4.620428e+03 |
| 51 | 2.958270e+03  | 1.724918e+03  | -1.385972e+03 |
| 52 | -5.081604e+02 | -1.207083e+03 | 6.858233e+02  |
| 53 | 1.773845e+02  | -6.487242e+02 | -6.591989e+02 |
| 54 | 2.077053e+02  | 2.198501e+02  | 1.320584e+03  |
| 55 | 1.209204e+03  | 5.955386e+02  | -1.006818e+03 |
| 56 | 8.390466e+03  | -3.509154e+01 | 8.004590e+03  |
| 57 | 9.251723e+02  | 3.899956e+03  | -3.974284e+03 |
| 58 | -2.163416e+01 | 5.262521e+01  | 3.290888e+03  |
| 59 | -5.116029e+02 | 2.541256e+03  | -3.531907e+03 |
| 60 | 3.200653e+03  | 7.873915e+03  | 5.115158e+03  |
| 61 | 5.359749e+03  | -8.068795e+03 | -9.081796e+01 |
| 62 | -1.331211e+03 | -3.280578e+03 | 1.243590e+03  |
| 63 | -1.053312e+04 | -5.136628e+03 | -5.860582e+03 |
| 64 | 1.142710e+03  | -4.707059e+03 | -5.898879e+03 |
| 65 | 2.321144e+03  | -1.132234e+03 | -1.448186e+03 |
| 66 | 3.495852e+03  | 5.481040e+03  | 2.004942e+03  |
| 67 | -5.085248e+03 | -5.515948e+03 | 4.064840e+03  |

trajectory 17

| atom | VX            | VY            | VZ            |
|------|---------------|---------------|---------------|
| 1    | -2.150533e+01 | 3.389178e+02  | 2.306570e+02  |
| 2    | 6.771030e+02  | 1.369971e+03  | 8.055504e+01  |
| 3    | -3.556966e+02 | -2.578252e+02 | -1.445217e+03 |
| 4    | -1.194189e+03 | -7.131354e+02 | -2.974035e+02 |
| 5    | 1.262075e+03  | 5.515506e+02  | -8.709385e+02 |
| 6    | -3.365592e+03 | -2.689692e+02 | 2.122280e+03  |
| 7    | -2.218622e+03 | -8.056857e+03 | -5.320760e+03 |
| 8    | -4.979513e+03 | 3.844333e+03  | 2.120853e+03  |
| 9    | 3.843200e+02  | 9.264472e+02  | 2.996051e+02  |
| 10   | 7.377137e+02  | -1.673286e+02 | 1.679705e+03  |
| 11   | 4.857977e+02  | 9.350698e+02  | -1.361870e+03 |
| 12   | -1.450909e+03 | -4.347311e+02 | 1.510894e+03  |
| 13   | -5.179083e+03 | -7.324597e+03 | 3.183956e+03  |
| 14   | 4.028218e+01  | 6.079584e+02  | -2.563935e+02 |
| 15   | 1.009218e+03  | -6.430868e+02 | -1.218502e+03 |
| 16   | -1.391188e+03 | -8.994315e+02 | -6.489569e+01 |
| 17   | -1.009198e+02 | -1.506179e+01 | 1.191867e+01  |
| 18   | 2.016294e+02  | -9.893478e+02 | -6.499603e+01 |
| 19   | -2.891612e+02 | 9.603260e+01  | -2.822336e+01 |
| 20   | -6.567239e+02 | 6.530157e+02  | -5.700461e+02 |
| 21   | -4.833209e+02 | 2.665211e+02  | -5.710851e+02 |
| 22   | 2.610082e+03  | -2.433998e+02 | -3.097141e+02 |
| 23   | -1.146197e+03 | -2.171396e+02 | -4.349523e+02 |

|    |               |               |               |
|----|---------------|---------------|---------------|
| 24 | 6.887905e+02  | -4.712135e+02 | 6.839764e+02  |
| 25 | 4.237278e+02  | 5.292309e+02  | -9.800374e+01 |
| 26 | 1.547998e+03  | -9.392101e+00 | 4.828215e+02  |
| 27 | -5.262618e+02 | -1.036284e+03 | 1.992737e+02  |
| 28 | -1.817033e+02 | 5.215593e+02  | 3.357819e+02  |
| 29 | -1.091932e+03 | 4.616396e+01  | -1.382077e+03 |
| 30 | 2.279764e+03  | 2.395637e+03  | -2.797993e+01 |
| 31 | 9.109815e+02  | -3.608800e+03 | 5.587878e+02  |
| 32 | -9.748569e+02 | 6.516918e+02  | 3.869438e+02  |
| 33 | 1.466272e+03  | -5.529047e+03 | 4.403170e+03  |
| 34 | 2.354045e+03  | -2.497202e+03 | -5.537763e+03 |
| 35 | -2.397635e+03 | 4.929014e+03  | 3.094099e+02  |
| 36 | -5.618967e+03 | -2.929111e+03 | -2.052589e+03 |
| 37 | -5.238847e+03 | -1.852798e+03 | 2.736592e+03  |
| 38 | 4.797558e+03  | 1.663158e+03  | -2.669857e+02 |
| 39 | -4.819407e+02 | -5.074184e+03 | 3.582759e+03  |
| 40 | 9.451155e+03  | -2.604389e+03 | -4.432539e+02 |
| 41 | -1.911832e+02 | 1.200860e+03  | -1.130673e+03 |
| 42 | 6.509109e+02  | 2.176332e+02  | -1.168868e+03 |
| 43 | -7.956364e+02 | -1.440583e+02 | 9.994496e+02  |
| 44 | -4.184817e+02 | -1.050762e+03 | 3.845448e+02  |
| 45 | -3.240345e+02 | 1.993754e+02  | -4.772399e+02 |
| 46 | -3.421398e+02 | -5.416137e+01 | -2.094072e+02 |
| 47 | -8.008140e+03 | 8.218168e+03  | 1.581367e+03  |
| 48 | -3.805650e+03 | -5.527830e+03 | 1.030388e+03  |
| 49 | 6.218238e+03  | -2.066539e+03 | 3.731891e+03  |
| 50 | -3.424394e+03 | -1.021987e+04 | 1.194695e+03  |
| 51 | 1.912610e+03  | 1.238929e+03  | 7.749316e+02  |
| 52 | 2.692692e+01  | -3.041646e+02 | -4.734665e+02 |
| 53 | -5.834084e+02 | 5.436589e+01  | 4.996119e+02  |
| 54 | 1.309616e+03  | 1.621930e+01  | -2.729413e+02 |
| 55 | -9.489414e+02 | 6.060934e+01  | -4.327395e+01 |
| 56 | 6.262131e+01  | 5.377112e+02  | 5.013936e+03  |
| 57 | 2.704300e+03  | 3.568055e+03  | -5.856183e+02 |
| 58 | -2.733145e+03 | -5.721314e+03 | 1.129965e+04  |
| 59 | 3.656025e+03  | -5.112110e+03 | 6.858383e+03  |
| 60 | 3.208210e+03  | 6.872232e+03  | 2.637099e+03  |
| 61 | -7.262258e+03 | -5.460851e+03 | 2.831453e+02  |
| 62 | 3.880284e+03  | -1.939926e+02 | -4.620807e+02 |
| 63 | -4.651634e+03 | 2.727157e+03  | 9.356648e+03  |
| 64 | -9.138152e+03 | 6.253415e+03  | 9.275275e+02  |
| 65 | 2.081666e+03  | -6.432521e+03 | 2.072910e+03  |
| 66 | 2.944314e+03  | -1.168477e+03 | 1.960355e+03  |
| 67 | 5.782453e+03  | 3.068888e+03  | -1.938345e+03 |

trajectory 18

| atom | VX            | VY            | VZ            |
|------|---------------|---------------|---------------|
| 1    | 1.210541e+02  | 4.692112e+02  | 1.201565e+02  |
| 2    | -1.247981e+03 | 7.813236e+02  | 5.736699e+01  |
| 3    | -1.355923e+02 | -1.105644e+02 | 9.541180e+02  |
| 4    | 1.380267e+03  | -8.195461e+02 | 8.480840e+02  |
| 5    | 2.447014e+02  | 5.851449e+02  | -1.875073e+03 |
| 6    | -6.862999e+03 | -3.388415e+03 | -1.031718e+03 |
| 7    | 5.859039e+03  | -5.853827e+03 | -5.624829e+03 |
| 8    | -9.059684e+02 | 3.867064e+03  | -7.496495e+03 |
| 9    | 4.765040e+02  | -8.190881e+01 | -8.002351e+02 |
| 10   | 8.203480e+02  | 8.739750e+01  | 6.615742e+02  |
| 11   | 4.923839e+02  | -2.122082e+01 | -2.721204e+02 |
| 12   | -8.373185e+02 | -2.451844e+03 | 1.767966e+03  |
| 13   | -1.965090e+02 | -7.452563e+03 | 3.309510e+03  |
| 14   | -1.401545e+03 | -8.352751e+02 | -4.138198e+02 |
| 15   | 4.476051e+02  | 9.298402e+02  | -1.121662e+03 |
| 16   | 2.540546e+02  | 3.003641e+02  | 4.130870e+02  |
| 17   | -6.486470e+01 | -1.389141e+02 | 5.025894e+01  |
| 18   | 1.258868e+03  | 4.688921e+02  | -1.518876e+02 |
| 19   | 1.357455e+03  | -1.713555e+03 | 4.049954e+02  |
| 20   | -1.366080e+02 | -4.855801e+02 | -2.093577e+02 |
| 21   | 4.046395e+02  | 4.559419e+02  | 2.196295e+00  |
| 22   | -1.175886e+02 | -2.407868e+03 | 5.121977e+02  |
| 23   | -2.191251e+03 | 3.830976e+02  | 9.795598e+01  |
| 24   | -1.256670e+03 | -2.629247e+02 | -3.262985e+02 |
| 25   | 2.287827e+03  | 8.589144e+02  | 3.839054e+02  |
| 26   | 7.360457e+02  | 5.185725e+02  | 1.185341e+01  |
| 27   | 1.205262e+03  | 9.824426e+02  | 2.022643e+02  |
| 28   | 1.287321e+03  | 3.107135e+02  | -1.059255e+03 |
| 29   | 4.447921e+02  | -6.388667e+02 | 1.972294e+03  |
| 30   | -1.696446e+03 | 3.004905e+02  | 4.600999e+02  |
| 31   | 1.157630e+02  | -2.135555e+03 | 8.560839e+02  |
| 32   | -2.635985e+02 | 2.195163e+01  | 6.391027e+02  |
| 33   | -3.892491e+03 | 3.675868e+03  | -3.154839e+02 |
| 34   | 2.077325e+03  | 6.773287e+03  | -7.535033e+03 |
| 35   | 3.838439e+03  | -1.797289e+03 | -6.150284e+03 |
| 36   | -6.676330e+03 | 1.572957e+03  | -1.098203e+03 |
| 37   | -2.386883e+03 | -2.141660e+02 | -1.145065e+03 |
| 38   | -7.595989e+03 | 4.316819e+03  | 2.993066e+03  |
| 39   | -2.888061e+03 | 3.319408e+03  | -2.561535e+03 |
| 40   | -6.549491e+03 | 1.499012e+03  | -3.327492e+02 |
| 41   | -1.726303e+02 | -2.450854e+02 | 5.842902e+01  |
| 42   | -1.708852e+03 | 4.892275e+02  | 9.799841e+01  |
| 43   | 1.158105e+03  | -5.248225e+02 | -8.310240e+02 |

|    |               |               |               |
|----|---------------|---------------|---------------|
| 44 | -4.024474e+02 | -9.976812e+02 | 2.674145e+02  |
| 45 | 1.259919e+03  | 1.803729e+03  | -1.713554e+03 |
| 46 | -7.797199e+02 | -1.852708e+03 | 1.168795e+03  |
| 47 | 5.585787e+03  | 2.473475e+03  | 1.197282e+03  |
| 48 | 7.048494e+03  | 3.395902e+03  | -9.542363e+03 |
| 49 | -2.975660e+03 | 1.463740e+03  | 5.880027e+03  |
| 50 | -3.159402e+03 | 7.417782e+02  | 5.796228e+03  |
| 51 | 3.325033e+03  | 3.314680e+03  | -2.068428e+03 |
| 52 | -5.978469e+02 | -1.327294e+03 | 4.679382e+02  |
| 53 | -7.938234e+02 | 1.800715e+03  | 9.350365e+02  |
| 54 | 3.868569e+02  | -6.482601e+02 | 3.252438e+02  |
| 55 | 6.408975e+02  | -3.725777e+02 | -1.780639e+02 |
| 56 | -6.192872e+03 | 3.874626e+03  | -1.442276e+03 |
| 57 | -2.012537e+03 | -2.984165e+03 | -1.406515e+03 |
| 58 | 6.464782e+03  | 5.928235e+02  | -7.964722e+03 |
| 59 | -5.784125e+03 | 3.351122e+03  | 2.602443e+02  |
| 60 | -5.605175e+02 | -6.254486e+03 | -5.682796e+03 |
| 61 | -2.537655e+03 | -3.924981e+03 | -3.980821e+03 |
| 62 | -6.406193e+02 | 1.031400e+03  | 1.272576e+03  |
| 63 | -2.578069e+03 | 3.584772e+03  | -6.490847e+03 |
| 64 | -9.308008e+03 | 2.343142e+03  | 3.272953e+01  |
| 65 | 9.413568e+02  | -1.169165e+03 | -1.308204e+03 |
| 66 | -1.075889e+04 | 8.719766e+02  | -3.916244e+03 |
| 67 | 1.592006e+03  | 3.528058e+03  | 5.391168e+03  |

trajectory 18

| atom | VX            | VY            | VZ            |
|------|---------------|---------------|---------------|
| 1    | 1.091081e+02  | -2.629829e+02 | 2.454290e+02  |
| 2    | -5.429863e+01 | -1.790988e+02 | -1.781563e+02 |
| 3    | -1.422413e+03 | 1.503050e+03  | -1.684518e+03 |
| 4    | 3.703215e+02  | -8.815832e+02 | 2.506417e+02  |
| 5    | 6.767202e+02  | 1.509222e+02  | 1.041356e+03  |
| 6    | -2.786457e+03 | -9.401920e+03 | 3.700795e+03  |
| 7    | 1.524050e+03  | -3.834519e+03 | -7.973540e+03 |
| 8    | -4.282884e+03 | 2.868352e+03  | 2.146406e+02  |
| 9    | 1.113884e+03  | 6.678274e+02  | 4.711058e+02  |
| 10   | 1.684865e+03  | -4.363926e+02 | 2.159599e+02  |
| 11   | -5.199970e+02 | 1.114205e+03  | -9.900793e+02 |
| 12   | -1.249590e+03 | -5.689932e+03 | 3.593102e+03  |
| 13   | -1.511701e+03 | 1.174723e+03  | -6.339910e+03 |
| 14   | 1.268753e+02  | 3.682980e+02  | -4.671675e+02 |
| 15   | -1.531914e+03 | 1.298064e+02  | 2.422188e+03  |
| 16   | 8.103457e+01  | 1.363466e+02  | 2.776299e+02  |
| 17   | -1.249124e+02 | 5.059208e+01  | -9.827817e+01 |



|    |               |               |               |
|----|---------------|---------------|---------------|
| 18 | 2.893971e+02  | 7.073751e+02  | 1.522026e+02  |
| 19 | -1.974909e+02 | -1.260763e+03 | -1.572417e+02 |
| 20 | -3.799087e+02 | -1.908437e+02 | 6.127414e+02  |
| 21 | -1.601836e+03 | 1.676751e+02  | 2.065294e+02  |
| 22 | 1.253312e+02  | 1.926373e+03  | -1.476600e+02 |
| 23 | 6.515637e+02  | 4.859694e+02  | -5.933568e+02 |
| 24 | 1.705964e+02  | -2.442094e+02 | -6.055047e+02 |
| 25 | -2.160291e+03 | -1.168930e+03 | -3.093879e+01 |
| 26 | 8.664453e+02  | -1.021668e+02 | -8.603993e+02 |
| 27 | 1.298152e+03  | 1.160309e+03  | 5.167925e+01  |
| 28 | 1.057995e+03  | -4.994252e+02 | -8.939684e+02 |
| 29 | 5.988018e+02  | 3.052843e+02  | -9.271218e+02 |
| 30 | -1.235424e+03 | 5.678834e+02  | -1.213512e+03 |
| 31 | -7.366582e+00 | 6.094349e+02  | 4.961469e+02  |
| 32 | -1.038255e+03 | -2.093410e+02 | 5.675427e+01  |
| 33 | 6.043851e+03  | 1.053334e+04  | -3.703611e+02 |
| 34 | -3.485739e+03 | 3.834060e+02  | 1.235912e+03  |
| 35 | -3.506871e+03 | 3.956631e+03  | 6.380052e+03  |
| 36 | -3.782656e+02 | -5.263757e+03 | 5.425331e+03  |
| 37 | -2.875322e+03 | -5.707326e+03 | 5.306448e+03  |
| 38 | 6.689618e+02  | 2.986433e+03  | 7.816431e+03  |
| 39 | -3.009177e+03 | -3.713453e+02 | 4.814911e+03  |
| 40 | -9.912231e+03 | -1.153768e+03 | -2.560023e+03 |
| 41 | 8.737540e+02  | -2.469678e+03 | 5.465374e+02  |
| 42 | -1.326959e+03 | 3.720775e+02  | -7.510371e+02 |
| 43 | -6.002954e+02 | 9.791223e+02  | 1.886032e+02  |
| 44 | 7.938866e+02  | -8.870586e+02 | -1.014025e+03 |
| 45 | 8.433127e+02  | 1.456771e+03  | 1.213172e+03  |
| 46 | 1.872189e+03  | 5.751937e+02  | -5.314327e+02 |
| 47 | -1.383060e+03 | -4.529874e+03 | 4.686640e+03  |
| 48 | -2.314532e+03 | -4.328999e+03 | 2.691384e+03  |
| 49 | -2.185574e+03 | 4.124149e+03  | 3.486347e+03  |
| 50 | -2.041653e+03 | -3.160606e+03 | 4.716185e+03  |
| 51 | 3.434988e+03  | 2.101235e+03  | -5.290293e+03 |
| 52 | 1.557556e+03  | 3.613992e+02  | 6.805061e+02  |
| 53 | -5.723973e+02 | 9.474443e+02  | 1.139260e+02  |
| 54 | 3.499951e+02  | -1.934356e+03 | 4.444066e+02  |
| 55 | 1.585494e+03  | -1.318768e+03 | -9.899866e+02 |
| 56 | -6.145254e+03 | -6.826459e+03 | -4.565493e+03 |
| 57 | -5.923665e+03 | -3.261866e+03 | 1.987827e+03  |
| 58 | -1.466940e+03 | -5.416457e+03 | -4.259538e+03 |
| 59 | 5.862896e+03  | 2.343794e+03  | -8.461795e+03 |
| 60 | -3.138292e+02 | 1.258378e+03  | 1.803049e+03  |
| 61 | 4.503988e+02  | -1.445950e+03 | 4.609729e+03  |
| 62 | -1.816687e+03 | 5.055790e+03  | -4.414576e+03 |
| 63 | -6.817400e+03 | -2.673916e+03 | -1.325227e+03 |

|    |               |               |               |
|----|---------------|---------------|---------------|
| 64 | -1.174425e+03 | 4.761446e+03  | 5.967944e+03  |
| 65 | -2.332751e+03 | 2.945363e+03  | -7.460517e+03 |
| 66 | -4.012169e+03 | 3.171508e+03  | -1.583788e+03 |
| 67 | -3.804315e+03 | -1.989316e+03 | 4.260051e+03  |

trajectory 19

| atom | VX            | VY            | VZ            |
|------|---------------|---------------|---------------|
| 1    | -5.194751e+02 | 7.398573e+01  | -2.118357e+02 |
| 2    | 7.117660e+02  | -1.661699e+03 | -9.008308e+02 |
| 3    | -4.151947e+01 | -1.075977e+02 | -1.134329e+03 |
| 4    | -4.006077e+02 | 6.582595e+02  | 1.012332e+03  |
| 5    | 7.380897e+02  | -4.344816e+02 | -1.276470e+03 |
| 6    | -4.144900e+03 | 3.878035e+03  | 2.527412e+00  |
| 7    | -3.326211e+01 | 3.262730e+03  | 7.966554e+03  |
| 8    | -6.072244e+03 | -5.226377e+03 | -1.828022e+03 |
| 9    | -5.063439e+02 | -2.346640e+02 | 3.755438e+02  |
| 10   | 5.003846e+02  | -1.593870e+03 | -1.317827e+02 |
| 11   | 6.173744e+01  | 1.239210e+03  | 1.111190e+02  |
| 12   | -2.152718e+03 | -8.211816e+03 | 8.634189e+02  |
| 13   | -4.382716e+03 | 3.274599e+03  | 1.424153e+03  |
| 14   | -4.191559e+02 | -8.916649e+02 | 5.879488e+02  |
| 15   | -1.033205e+03 | -5.018225e+02 | -1.799533e+03 |
| 16   | 1.486971e+03  | -1.660519e+02 | 7.577034e+02  |
| 17   | 7.761677e+01  | 1.293435e+02  | -2.683746e+01 |
| 18   | -3.446428e+02 | -2.532315e+02 | 1.908167e+03  |
| 19   | -2.939128e+02 | 1.342577e+03  | -1.862609e+03 |
| 20   | 4.375401e+02  | -9.368084e+02 | 9.194831e+01  |
| 21   | 2.170863e+02  | 1.123818e+03  | -1.419540e+02 |
| 22   | -1.886219e+03 | 1.934684e+01  | 4.325778e+02  |
| 23   | 1.028527e+03  | 1.514661e+02  | 7.864298e+02  |
| 24   | 1.618168e+02  | 1.029569e+03  | 4.225554e+02  |
| 25   | 5.049368e+02  | -4.765684e+01 | -1.259057e+03 |
| 26   | 8.343260e+02  | 2.138632e+02  | -4.833655e+02 |
| 27   | 1.424551e+03  | -7.346602e+02 | 1.233918e+03  |
| 28   | 2.405314e+03  | 6.581892e+02  | -1.311290e+03 |
| 29   | -1.608260e+03 | -4.385827e+02 | 1.245492e+03  |
| 30   | 9.780605e+02  | 8.138203e+02  | -3.581455e+02 |
| 31   | -1.044091e+03 | 3.293844e+01  | -1.821147e+02 |
| 32   | 1.008540e+03  | 8.436223e+02  | 1.824040e+02  |
| 33   | 6.606334e+02  | 4.481292e+03  | -3.241576e+03 |
| 34   | 6.251525e+03  | 6.649959e+03  | -3.777463e+01 |
| 35   | -4.748140e+03 | -2.070506e+03 | 5.677277e+03  |
| 36   | -1.843077e+03 | -4.860982e+03 | -6.582587e+03 |
| 37   | -2.209810e+03 | -8.497313e+03 | 5.025599e+03  |

|    |               |               |               |
|----|---------------|---------------|---------------|
| 38 | -2.899856e+03 | 3.232508e+03  | -1.337369e+03 |
| 39 | -3.250849e+03 | -4.023451e+03 | 2.353867e+03  |
| 40 | -6.916901e+03 | -3.215040e+02 | -2.109251e+03 |
| 41 | -1.766781e+02 | 7.399551e+02  | 1.208733e+02  |
| 42 | -8.144061e+02 | -1.079426e+02 | -8.631782e+02 |
| 43 | 7.680099e+02  | -1.853973e+02 | 1.848252e+03  |
| 44 | -2.493366e+02 | -1.514271e+03 | 1.771494e+03  |
| 45 | -1.022302e+03 | 3.359718e+02  | -5.199594e+02 |
| 46 | 1.623614e+03  | 1.311921e+03  | -1.678704e+03 |
| 47 | 3.526210e+03  | 1.822233e+03  | -1.298759e+03 |
| 48 | -1.455220e+03 | -2.569497e+03 | 3.030548e+03  |
| 49 | 1.207165e+04  | -3.771108e+03 | -4.189526e+02 |
| 50 | -1.332138e+03 | 7.291106e+02  | 3.220057e+03  |
| 51 | -3.434848e+03 | -7.401832e+03 | 3.724220e+02  |
| 52 | 1.076500e+03  | 1.053490e+03  | 8.457932e+02  |
| 53 | -9.262555e+02 | -3.476390e+02 | -5.583855e+02 |
| 54 | -2.665136e+02 | -4.266819e+01 | -1.803587e+02 |
| 55 | -7.883784e+02 | -1.492446e+03 | 7.271634e+02  |
| 56 | -5.255899e+03 | -5.804276e+03 | -6.223167e+03 |
| 57 | 5.867334e+03  | 2.329288e+03  | 2.721970e+03  |
| 58 | -8.831926e+02 | 2.118379e+03  | 5.543474e+02  |
| 59 | 4.373153e+03  | -3.679033e+03 | 4.079349e+02  |
| 60 | -2.667088e+03 | 7.403025e+03  | 6.527813e+03  |
| 61 | 1.466065e+03  | 2.973205e+03  | 1.434002e+03  |
| 62 | 4.384117e+03  | -2.494243e+03 | -1.127028e+03 |
| 63 | -6.620162e+03 | -6.021552e+03 | -1.639250e+03 |
| 64 | 4.738022e+03  | 1.233368e+03  | 2.050915e+03  |
| 65 | -3.348408e+03 | 3.030898e+03  | -1.264277e+04 |
| 66 | 3.277909e+03  | -3.554562e+03 | -9.288810e+00 |
| 67 | 2.866692e+03  | 9.291921e+01  | 3.170126e+02  |

trajectory 19

| atom | VX            | VY            | VZ            |
|------|---------------|---------------|---------------|
| 1    | -1.829915e+02 | -6.475507e+01 | 2.288869e+02  |
| 2    | -1.419889e+03 | -1.161223e+03 | -6.668448e+02 |
| 3    | -6.731481e+02 | 6.144487e+02  | 1.225560e+03  |
| 4    | 5.852604e+02  | 8.596592e+02  | -8.767066e+01 |
| 5    | -4.733368e+02 | -6.803683e+02 | 3.819684e+02  |
| 6    | -8.459302e+02 | -3.490507e+03 | 2.541019e+03  |
| 7    | 2.685938e+03  | 5.320532e+03  | 7.918806e+03  |
| 8    | -3.106814e+03 | -4.831493e+03 | -3.935929e+03 |
| 9    | -8.100722e+02 | 1.226949e+01  | -4.487040e+02 |
| 10   | -1.241460e+03 | -4.304717e+02 | 3.423273e+02  |
| 11   | 1.528255e+03  | -1.274373e+03 | 7.091208e+02  |

|    |               |               |               |
|----|---------------|---------------|---------------|
| 12 | 9.903025e+03  | 5.037415e+03  | -4.054647e+03 |
| 13 | 3.441630e+03  | -3.762269e+02 | 5.813027e+03  |
| 14 | 5.729220e+02  | -4.251677e+02 | -4.168942e+01 |
| 15 | 1.176601e+03  | -9.939709e+02 | -7.942710e+02 |
| 16 | -3.441307e+02 | 1.762618e+03  | 8.747580e+02  |
| 17 | 2.993169e+02  | -2.774831e+02 | 8.613551e+01  |
| 18 | 8.744723e+02  | -4.407871e+02 | -3.224896e+01 |
| 19 | -5.654551e+02 | 1.135230e+03  | -8.914885e+02 |
| 20 | -6.912259e+02 | -1.309447e+03 | 1.116241e+03  |
| 21 | -6.522664e+02 | -1.645047e+02 | 9.691139e+01  |
| 22 | 1.458733e+03  | 2.213325e+01  | -5.662034e+02 |
| 23 | -2.398910e+02 | 3.578083e+02  | -4.436186e+02 |
| 24 | -9.212637e+02 | 3.794848e+02  | 9.347436e+01  |
| 25 | 1.550026e+03  | 5.243259e+02  | -7.523309e+02 |
| 26 | 3.585388e+02  | 6.653231e+02  | 7.924727e+01  |
| 27 | -1.069512e+03 | 1.489033e+03  | 6.134647e+02  |
| 28 | 1.517636e+02  | 3.593230e+02  | 3.122711e+02  |
| 29 | -2.124075e+03 | 1.034654e+03  | -7.283668e+02 |
| 30 | 3.413191e+02  | 2.721473e+02  | -2.093991e+03 |
| 31 | 1.067030e+03  | -1.473405e+03 | 1.318407e+03  |
| 32 | 9.306834e+02  | -4.927138e+02 | 1.168467e+02  |
| 33 | 7.934791e+02  | 4.495964e+03  | -6.151101e+03 |
| 34 | -6.364523e+03 | 5.908737e+01  | -1.460859e+03 |
| 35 | -2.964625e+03 | 4.326272e+03  | 4.197706e+03  |
| 36 | -2.222000e+03 | 7.688841e+03  | 4.669660e+03  |
| 37 | 1.725304e+03  | -9.542780e+02 | 2.884814e+03  |
| 38 | 6.516147e+03  | 2.444767e+03  | -1.893924e+03 |
| 39 | -6.017832e+03 | 1.106591e+03  | -7.116145e+03 |
| 40 | 2.735074e+03  | -4.579551e+03 | -6.042633e+01 |
| 41 | 2.158503e+01  | 2.295460e+02  | -1.102287e+02 |
| 42 | -1.447096e+02 | 1.240904e+03  | 8.104325e+01  |
| 43 | -1.776748e+03 | -1.534871e+03 | 5.719634e+02  |
| 44 | 5.975668e+02  | 1.004648e+03  | 2.289627e+02  |
| 45 | 1.074407e+03  | 7.349830e+01  | -1.291496e+03 |
| 46 | 1.973221e+02  | -1.331882e+03 | -7.247662e+02 |
| 47 | 4.039404e+03  | -5.023271e+03 | 4.426743e+03  |
| 48 | -7.430841e+03 | 3.665688e+03  | 5.624224e+03  |
| 49 | -3.884083e+03 | 2.658663e+03  | -2.672902e+02 |
| 50 | 1.943780e+03  | -5.252062e+03 | 1.899939e+03  |
| 51 | 4.527369e+03  | -1.470576e+03 | -3.167404e+03 |
| 52 | -5.637345e+02 | 6.281191e+02  | -8.899231e+02 |
| 53 | 2.852452e+02  | 3.250413e+02  | 1.312832e+03  |
| 54 | -2.619335e+02 | -7.833102e+02 | -1.393391e+03 |
| 55 | 1.924446e+02  | 1.640768e+02  | -1.828039e+02 |
| 56 | 8.952314e+03  | 3.457540e+03  | 5.311982e+03  |
| 57 | 2.518088e+02  | 9.814475e+02  | -2.495351e+02 |

|    |               |               |               |
|----|---------------|---------------|---------------|
| 58 | -8.528839e+02 | -7.873484e+02 | -1.376853e+03 |
| 59 | 5.323333e+03  | -2.730354e+02 | 3.775770e+02  |
| 60 | -8.277052e+03 | -2.539551e+03 | -7.932689e+03 |
| 61 | 7.395406e+03  | 3.526308e+03  | 1.481534e+03  |
| 62 | 4.559268e+03  | 5.795098e+03  | -6.527267e+03 |
| 63 | -3.633372e+03 | -8.183748e+03 | 2.625903e+03  |
| 64 | -5.097675e+03 | -5.395648e+02 | -2.426863e+03 |
| 65 | 2.490355e+03  | 1.839657e+03  | 1.130437e+03  |
| 66 | -7.878352e+03 | 2.302861e+03  | -8.746616e+03 |
| 67 | -3.539027e+03 | 3.996558e+03  | -7.834047e+02 |

trajectory 20

| atom | VX            | VY            | VZ            |
|------|---------------|---------------|---------------|
| 1    | -6.548094e+00 | 1.394994e+01  | -1.418493e+02 |
| 2    | 6.721545e+02  | 4.325222e+02  | -3.791045e+02 |
| 3    | 1.214513e+03  | 5.704624e+02  | -1.606974e+03 |
| 4    | 1.026970e+02  | -2.950422e+02 | 1.712345e+03  |
| 5    | 5.303840e+02  | 1.090917e+03  | 4.153181e+02  |
| 6    | -8.447006e+03 | -1.177523e+03 | -4.410559e+02 |
| 7    | -1.277880e+03 | -4.980767e+03 | -7.078508e+03 |
| 8    | 2.876303e+02  | -7.203742e+02 | -4.047342e+03 |
| 9    | 1.799220e+02  | 3.891714e+02  | -2.377744e+02 |
| 10   | 1.414925e+03  | -1.252365e+02 | -9.667515e+02 |
| 11   | 6.530714e+02  | 6.595594e+01  | -2.434146e+02 |
| 12   | 1.197805e+03  | 2.084636e+02  | 6.527580e+03  |
| 13   | -8.226175e+03 | -3.169843e+03 | 9.137100e+03  |
| 14   | 4.758856e+02  | 2.474631e+02  | -6.893332e+02 |
| 15   | 5.105420e+02  | -7.139837e+02 | 1.239833e+03  |
| 16   | -4.024331e+01 | -1.327681e+02 | 6.518805e+02  |
| 17   | 1.191615e+02  | 9.950978e+01  | 1.991245e+02  |
| 18   | -4.278328e+02 | -6.426752e+02 | 1.616531e+02  |
| 19   | 8.039583e+02  | 6.063290e+02  | -1.489627e+03 |
| 20   | 1.059552e+03  | -9.378271e+02 | 1.096839e+03  |
| 21   | 1.081871e+03  | -3.047346e+02 | -1.705409e+03 |
| 22   | -6.065531e+02 | -5.927733e+02 | 8.263967e+02  |
| 23   | -2.293305e+03 | 6.999283e+02  | -3.481455e+02 |
| 24   | -1.400188e+03 | 2.661978e+02  | 9.698237e+02  |
| 25   | 1.247434e+03  | 6.058895e+02  | 1.394497e+02  |
| 26   | 5.333857e+01  | 8.161726e+02  | -3.754675e+02 |
| 27   | 2.474554e+02  | 1.101511e+01  | -4.674612e+02 |
| 28   | -6.955660e+02 | 2.200301e+03  | 2.333598e+02  |
| 29   | 1.587857e+03  | -1.192626e+03 | 6.075033e+02  |
| 30   | -1.440600e+03 | -3.161882e+02 | -1.878022e+03 |
| 31   | -1.605792e+03 | -6.452469e+02 | 9.631700e+02  |

|    |               |               |               |
|----|---------------|---------------|---------------|
| 32 | 3.749812e+02  | 1.009813e+03  | -3.723990e+02 |
| 33 | -1.693198e+03 | -6.902908e+03 | 3.752381e+03  |
| 34 | 3.254450e+03  | 1.043498e+02  | 2.652804e+03  |
| 35 | 3.614022e+03  | -6.332990e+03 | 2.280352e+03  |
| 36 | 4.384288e+03  | -6.709979e+02 | 3.413779e+03  |
| 37 | -3.121917e+03 | 4.187530e+03  | -5.136695e+03 |
| 38 | 6.517313e+03  | -6.791341e+03 | 3.536762e+03  |
| 39 | -7.078634e+03 | 1.320604e+03  | -2.789190e+03 |
| 40 | -4.719583e+03 | 6.798936e+02  | 3.072763e+03  |
| 41 | 8.165646e+02  | -1.636164e+03 | 2.695087e+02  |
| 42 | -1.022054e+03 | -6.598529e+02 | -3.852334e+02 |
| 43 | 1.978268e+02  | -1.688638e+02 | -1.015354e+03 |
| 44 | -1.808412e+03 | 1.409901e+03  | 3.275022e+02  |
| 45 | -7.831896e+02 | 8.314875e+02  | -1.329879e+02 |
| 46 | 4.882453e+02  | 3.632719e+02  | 3.672120e+02  |
| 47 | 6.232810e+03  | -8.653006e+03 | 4.438704e+03  |
| 48 | -2.066419e+03 | 5.429861e+03  | 2.082940e+03  |
| 49 | 6.800245e+03  | -5.228984e+02 | 4.504080e+03  |
| 50 | 2.122172e+03  | -4.129388e+03 | -7.692745e+02 |
| 51 | -1.493981e+02 | -4.100446e+03 | 7.852577e+02  |
| 52 | -4.864332e+02 | -5.147914e+02 | -6.154751e+01 |
| 53 | -9.147036e+01 | 1.164419e+03  | 2.604604e+02  |
| 54 | 7.611620e+02  | -1.165971e+03 | 4.412032e+02  |
| 55 | -1.539803e+01 | -4.407168e+02 | -1.319010e+02 |
| 56 | -4.699739e+03 | 9.467080e+03  | 4.583979e+03  |
| 57 | -1.728370e+03 | 1.601678e+03  | -1.473824e+03 |
| 58 | -6.500649e+03 | -2.370833e+03 | 8.606377e+03  |
| 59 | -5.104704e+03 | -2.238403e+03 | -1.139973e+03 |
| 60 | -5.246307e+03 | -8.678298e+03 | -2.375078e+03 |
| 61 | -2.427204e+03 | -9.907941e+02 | -4.717618e+03 |
| 62 | 2.823692e+03  | 2.788170e+03  | -6.756078e+03 |
| 63 | -5.065810e+03 | -5.885367e+03 | -3.648202e+03 |
| 64 | -3.533694e+03 | 2.266407e+03  | -1.921532e+03 |
| 65 | -4.042767e+03 | 7.735779e+03  | -3.616129e+03 |
| 66 | 5.935769e+03  | -7.061870e+03 | -1.014135e+03 |
| 67 | 4.326124e+03  | 2.696084e+02  | -1.735190e+03 |

trajectory 20

| atom | VX            | VY            | VZ            |
|------|---------------|---------------|---------------|
| 1    | 3.724290e+01  | -3.116398e+02 | 3.100590e+02  |
| 2    | -1.723303e+02 | -3.796381e+02 | -2.425850e+02 |
| 3    | 5.453431e+02  | -1.958234e+03 | 1.164231e+03  |
| 4    | -8.061200e+02 | 6.601681e+02  | 1.746669e+02  |
| 5    | 2.012543e+03  | -6.069647e+02 | 7.960191e+02  |

|    |               |               |               |
|----|---------------|---------------|---------------|
| 6  | -1.734564e+03 | -4.917844e+03 | -1.962957e+03 |
| 7  | -2.248481e+03 | 3.142866e+03  | 8.204964e+03  |
| 8  | -4.276205e+03 | -9.467842e+02 | -5.313547e+02 |
| 9  | -6.371223e+02 | 3.214221e+01  | -8.939908e+02 |
| 10 | -8.908834e+02 | -8.157215e+01 | 1.015130e+02  |
| 11 | 3.501582e+02  | -6.459591e+02 | 8.542789e+02  |
| 12 | -2.761655e+03 | 2.805390e+03  | -9.904659e+03 |
| 13 | 4.859571e+03  | -2.498584e+03 | 2.141069e+03  |
| 14 | -4.050203e+02 | 3.726002e+01  | 1.198094e+02  |
| 15 | 1.604765e+03  | 3.811687e+02  | -1.359862e+03 |
| 16 | -5.562584e+01 | 2.443368e+02  | -9.419393e+01 |
| 17 | -4.831218e+01 | 6.891491e+00  | -5.138812e+01 |
| 18 | -2.551885e+02 | -6.946640e+02 | 8.102079e+02  |
| 19 | -4.828361e+02 | 1.872869e+03  | -8.576103e+02 |
| 20 | -9.535534e+01 | -1.249236e+03 | 4.370653e+02  |
| 21 | -5.069971e+02 | 9.652845e+02  | 6.769392e+02  |
| 22 | -1.774434e+02 | -1.676113e+03 | -5.630819e+02 |
| 23 | 2.218784e+02  | 1.441859e+03  | 3.754869e+02  |
| 24 | -3.554319e+02 | -5.881030e+02 | -9.768376e+02 |
| 25 | 2.310979e+03  | -1.120930e+02 | -1.518071e+03 |
| 26 | 2.379181e+01  | 6.064639e+02  | -3.618924e+02 |
| 27 | 2.489794e+02  | -3.680699e+02 | -1.750435e+03 |
| 28 | 1.538180e+03  | 7.431386e+02  | 1.083432e+03  |
| 29 | -1.768414e+03 | -3.618923e+02 | 2.232253e+02  |
| 30 | -4.955285e+02 | 2.300513e+02  | 1.283176e+03  |
| 31 | -9.511258e+02 | 5.017237e+02  | -9.226544e+02 |
| 32 | -1.374924e+03 | 3.290140e+02  | 8.497473e+02  |
| 33 | 9.608828e+01  | 8.549382e+03  | -3.966056e+03 |
| 34 | -1.773016e+03 | -2.871553e+03 | 3.417061e+03  |
| 35 | -3.334878e+02 | -2.611183e+02 | -5.239088e+03 |
| 36 | 2.181019e+03  | 1.033768e+03  | 8.919704e+03  |
| 37 | 2.796794e+03  | 2.134487e+03  | -5.189737e+03 |
| 38 | 2.101435e+03  | -9.611205e+03 | 3.575927e+03  |
| 39 | -3.015987e+03 | -1.014801e+02 | -5.865227e+03 |
| 40 | 5.678444e+03  | -3.929998e+03 | 6.865680e+02  |
| 41 | 1.431785e+03  | -1.011288e+02 | 9.535625e+01  |
| 42 | -1.298967e+03 | -3.979979e+02 | -5.298721e+02 |
| 43 | 7.054574e+02  | 1.458333e+03  | -9.400266e+02 |
| 44 | -1.237546e+03 | -9.594234e+02 | -1.537296e+02 |
| 45 | 7.933816e+02  | 1.603553e+03  | -5.665842e+02 |
| 46 | -9.774621e+02 | -5.850665e+02 | -3.783427e+02 |
| 47 | 7.136224e+03  | -4.498333e+03 | 3.680353e+03  |
| 48 | -3.094196e+03 | 1.569300e+03  | -2.708194e+03 |
| 49 | 4.664871e+03  | 2.588835e+03  | 2.838047e+03  |
| 50 | 1.891430e+03  | -8.742948e+03 | 5.246994e+03  |
| 51 | 4.160315e+03  | 2.045448e+03  | -3.594424e+03 |

|    |               |               |               |
|----|---------------|---------------|---------------|
| 52 | 6.004028e+02  | 1.527297e+03  | 3.085181e+02  |
| 53 | 1.793664e+03  | 6.568039e+02  | -6.476928e+02 |
| 54 | -4.575510e+01 | -1.117206e+03 | 5.840263e+02  |
| 55 | 9.768702e+02  | 8.565848e+02  | 8.202730e+02  |
| 56 | -3.722739e+03 | -6.665403e+02 | -1.953818e+02 |
| 57 | 2.717434e+03  | -4.642082e+03 | -5.475303e+03 |
| 58 | 1.034189e+03  | -1.578203e+03 | 8.284465e+03  |
| 59 | -8.820339e+03 | -3.340568e+02 | 5.310293e+03  |
| 60 | -4.609685e+03 | 1.739171e+03  | -4.399632e+03 |
| 61 | -9.117281e+02 | 1.472409e+03  | 1.879690e+03  |
| 62 | -7.746723e+03 | 6.727276e+03  | -4.807227e+03 |
| 63 | 1.812528e+03  | 4.165077e+03  | -6.008398e+03 |
| 64 | 4.956693e+03  | 1.441952e+03  | 1.986061e+03  |
| 65 | -1.966542e+03 | -6.182024e+02 | -8.738775e+02 |
| 66 | -1.195739e+04 | 3.528785e+03  | -8.049247e+02 |
| 67 | -4.207919e+02 | 1.691103e+03  | 1.697693e+03  |

trajectory 21

| atom | VX            | VY            | VZ            |
|------|---------------|---------------|---------------|
| 1    | 2.000250e+02  | 1.094295e+02  | -2.240590e+02 |
| 2    | -1.165988e+03 | -2.403353e+02 | -2.582684e+02 |
| 3    | -9.285608e+02 | 1.199538e+03  | 1.518039e+03  |
| 4    | -2.148195e+02 | -1.947654e+01 | -9.840031e+02 |
| 5    | 2.937740e+01  | -3.051486e+02 | 1.074865e+03  |
| 6    | -6.401313e+02 | 4.187546e+02  | -2.641613e+03 |
| 7    | 3.380813e+03  | -5.529283e+03 | 4.105171e+03  |
| 8    | -7.855834e+03 | 4.686936e+03  | -7.967164e+03 |
| 9    | 8.289725e+02  | -4.371608e+02 | 1.035969e+02  |
| 10   | 1.768493e+03  | 7.883138e+02  | -1.419655e+03 |
| 11   | -1.529767e+03 | 1.601030e+03  | 7.930948e+02  |
| 12   | -1.307465e+03 | -3.883081e+03 | -3.386130e+02 |
| 13   | -8.169145e+03 | -6.109124e+03 | -5.965094e+02 |
| 14   | -2.435517e+02 | -2.872500e+02 | 1.599153e+02  |
| 15   | -1.684547e+03 | -5.405106e+02 | -7.536356e+02 |
| 16   | 3.186089e+02  | 4.732705e+02  | 2.360807e+02  |
| 17   | -1.835878e+02 | 6.878135e+01  | -8.981054e+01 |
| 18   | 1.185950e+03  | 1.194486e+02  | 1.007378e+03  |
| 19   | 7.549719e+02  | -4.065106e+02 | -6.235909e+01 |
| 20   | -5.850115e+02 | -1.112973e+03 | 2.120624e+02  |
| 21   | 1.458911e+02  | 8.826170e+02  | -1.376578e+03 |
| 22   | -1.195377e+03 | 2.422572e+02  | 6.626303e+02  |
| 23   | 1.431175e+03  | 8.198144e+02  | -5.342373e+02 |
| 24   | -1.871105e+02 | -3.814935e+02 | 1.193425e+03  |
| 25   | 1.553284e+02  | -2.337901e+02 | -8.481018e+02 |



|    |               |               |               |
|----|---------------|---------------|---------------|
| 26 | 3.925148e+02  | 6.156677e+02  | 3.159384e+02  |
| 27 | 5.865003e+01  | -2.802405e+02 | -2.080059e+02 |
| 28 | -6.908319e+02 | 1.419226e+03  | -2.443962e+02 |
| 29 | 4.295894e+01  | -1.201395e+03 | 1.347030e+03  |
| 30 | 2.117139e+03  | 2.209626e+02  | 6.121752e+02  |
| 31 | -1.291827e+03 | -9.771427e+02 | -1.158667e+03 |
| 32 | -1.491080e+03 | -2.368780e+02 | 3.516763e+02  |
| 33 | 6.843398e+03  | 3.705970e+03  | -2.429165e+03 |
| 34 | 7.106177e+03  | 3.252000e+03  | 3.886512e+02  |
| 35 | -7.271562e+02 | 4.011665e+03  | 8.319049e+02  |
| 36 | -1.152453e+03 | -6.326518e+03 | -5.367415e+03 |
| 37 | -3.432099e+02 | 5.433006e+03  | -3.271449e+03 |
| 38 | 8.140634e+02  | 2.030251e+03  | -2.619790e+03 |
| 39 | 7.426575e+02  | -3.323711e+02 | -3.601714e+03 |
| 40 | 4.758731e+03  | -5.121633e+03 | -3.748601e+03 |
| 41 | 6.044489e+02  | -1.130614e+03 | 2.265073e+02  |
| 42 | 3.115551e+02  | 2.235474e+03  | -1.459111e+03 |
| 43 | 2.738009e+02  | -2.137028e+03 | 1.334123e+03  |
| 44 | 2.531226e+02  | -5.724007e+02 | 7.584845e+02  |
| 45 | -2.423975e+02 | 2.807534e+02  | -9.573903e+02 |
| 46 | 5.066148e+02  | 7.867791e+02  | -3.334601e+02 |
| 47 | -2.754255e+03 | -3.117042e+03 | 3.386509e+03  |
| 48 | -6.881596e+03 | -2.873269e+03 | -1.826872e+03 |
| 49 | -1.332367e+03 | 6.413976e+03  | 8.475711e+02  |
| 50 | -7.550880e+03 | -4.541673e+03 | 3.187784e+03  |
| 51 | 5.362267e+03  | 4.858769e+03  | 7.835082e+01  |
| 52 | 2.545496e+02  | -7.119893e+02 | -4.390398e+02 |
| 53 | 1.420269e+03  | 7.297912e+00  | 8.920235e+02  |
| 54 | 4.701092e+01  | 1.229366e+03  | 7.490992e+02  |
| 55 | 3.217223e+01  | -2.028006e+03 | 1.272839e+03  |
| 56 | -1.463263e+03 | 3.018682e+03  | 6.558329e+03  |
| 57 | -5.173330e+02 | 5.460797e+02  | -7.991519e+02 |
| 58 | -9.784876e+03 | 1.836598e+03  | 5.539617e+03  |
| 59 | -7.118922e+03 | 2.492158e+03  | -1.770785e+03 |
| 60 | 5.316875e+03  | -7.873095e+03 | -6.428427e+03 |
| 61 | -2.152310e+03 | -1.252768e+03 | 3.220362e+02  |
| 62 | 1.166902e+03  | -2.031719e+03 | 5.959152e+02  |
| 63 | -6.323291e+03 | -8.035009e+03 | 2.105999e+03  |
| 64 | -6.847104e+02 | -9.963101e+03 | 1.700212e+03  |
| 65 | -4.488847e+03 | -6.826692e+02 | 1.890761e+03  |
| 66 | -2.707580e+03 | -1.575795e+03 | -2.238123e+03 |
| 67 | 6.931421e+03  | 9.478528e+03  | -2.137645e+02 |

trajectory 21

| atom | VX            | VY            | VZ            |
|------|---------------|---------------|---------------|
| 1    | 1.215831e+02  | 3.385858e+02  | -2.018848e+02 |
| 2    | 4.808733e+02  | 1.208963e+03  | -5.385281e+00 |
| 3    | -3.207039e+01 | 1.286841e+03  | -1.210370e+03 |
| 4    | 4.834577e+02  | -2.095278e+02 | 6.225561e+02  |
| 5    | 3.968005e+02  | -1.056464e+03 | -4.987180e+02 |
| 6    | -6.594518e+03 | -1.595394e+03 | 8.837122e+03  |
| 7    | -7.801823e+02 | -9.076172e+01 | 3.134761e+03  |
| 8    | -1.503165e+03 | 5.182421e+03  | 4.688471e+02  |
| 9    | -6.764949e+02 | 6.049069e+02  | 6.140491e+02  |
| 10   | -3.386599e+02 | -1.082595e+03 | 1.407276e+02  |
| 11   | 5.476404e+01  | -4.956148e+02 | 7.611006e+02  |
| 12   | 6.142022e+03  | -3.020048e+02 | -4.272222e+03 |
| 13   | -5.590763e+02 | 7.074451e+03  | 6.292483e+02  |
| 14   | 7.098169e+02  | -2.535601e+02 | -4.443883e+02 |
| 15   | -1.202043e+03 | 8.393661e+02  | -9.876525e+02 |
| 16   | -4.796926e+02 | -9.280358e+02 | -5.178099e+02 |
| 17   | 5.810728e+01  | -4.149668e+02 | 1.325890e+02  |
| 18   | 5.955778e+02  | -9.063468e+02 | 1.111007e+03  |
| 19   | -2.773094e+03 | -1.190747e+02 | -8.161982e+02 |
| 20   | -2.043051e+02 | -1.339584e+03 | -1.075337e+02 |
| 21   | -3.777400e+02 | 1.419979e+03  | -9.722063e+02 |
| 22   | 7.534444e+02  | -1.159738e+03 | 1.086305e+03  |
| 23   | 1.393515e+02  | -1.796887e+01 | 1.527140e+02  |
| 24   | -8.973430e+02 | 3.340611e+02  | 9.103766e+01  |
| 25   | 1.273342e+03  | -3.157845e+02 | 3.186754e+02  |
| 26   | 2.754705e+02  | -5.399642e+01 | 8.440622e+01  |
| 27   | 5.134542e+01  | 1.195624e+03  | -4.984671e+02 |
| 28   | 1.324457e+02  | -3.168196e+02 | -7.342500e+01 |
| 29   | 2.126476e+03  | -3.639717e+02 | -1.123347e+03 |
| 30   | -5.772481e+02 | 1.646491e+03  | 1.291098e+03  |
| 31   | 1.718928e+03  | -2.101423e+01 | -2.125056e+02 |
| 32   | 4.231656e+02  | 2.656415e+02  | -4.249757e+02 |
| 33   | -8.102226e+03 | -5.809444e+03 | 1.441518e+03  |
| 34   | -8.371880e+03 | -2.899331e+03 | -3.074192e+03 |
| 35   | -2.570691e+03 | -6.146658e+03 | -4.085755e+03 |
| 36   | -4.808990e+03 | 4.284668e+02  | -8.952568e+02 |
| 37   | -2.509701e+03 | -6.730581e+03 | 8.448241e+02  |
| 38   | 7.136168e+03  | -1.904716e+02 | 2.223707e+03  |
| 39   | -1.389010e+03 | 3.197084e+03  | -7.731149e+02 |
| 40   | -5.307719e+03 | 2.621384e+03  | 1.228686e+03  |
| 41   | -4.466921e+02 | -8.570444e+02 | 5.129761e+02  |
| 42   | 1.296876e+03  | -4.276992e+01 | -1.179598e+03 |
| 43   | 8.059129e+02  | 1.013927e+03  | 6.083036e+02  |
| 44   | 4.912092e+01  | -7.295354e+02 | -1.532310e+03 |
| 45   | -2.727592e+03 | 9.323908e+02  | -1.535785e+02 |

|    |               |               |               |
|----|---------------|---------------|---------------|
| 46 | -1.118428e+02 | -2.749589e+02 | 9.448440e+02  |
| 47 | 5.225368e+03  | 5.095421e+03  | -1.159227e+03 |
| 48 | -7.349329e+02 | -1.185105e+03 | 1.149275e+03  |
| 49 | 7.894686e+03  | 4.207610e+03  | 6.595876e+02  |
| 50 | 3.638288e+03  | 3.912228e+02  | 1.619826e+03  |
| 51 | -9.302298e+03 | -7.356368e+03 | 5.212454e+03  |
| 52 | -1.308584e+03 | -3.273786e+02 | 7.913453e+02  |
| 53 | 5.136307e+02  | 5.677394e+02  | 5.216373e+02  |
| 54 | 7.703921e+02  | 1.347329e+03  | 5.741361e+02  |
| 55 | -1.783973e+02 | 6.955098e+02  | 1.569255e+03  |
| 56 | -1.136022e+03 | -2.512155e+03 | -4.042476e+03 |
| 57 | 4.977727e+03  | 2.722344e+03  | -1.084852e+03 |
| 58 | 4.805178e+03  | 2.930702e+03  | -6.229302e+03 |
| 59 | -4.323347e+02 | -2.036076e+03 | -6.715303e+03 |
| 60 | -1.852250e+03 | -6.689622e+02 | -1.556431e+03 |
| 61 | -6.936505e+03 | -2.284421e+03 | -7.631037e+03 |
| 62 | -1.723358e+03 | -5.458070e+03 | -9.288767e+02 |
| 63 | -7.902653e+03 | -6.354074e+03 | 2.399746e+03  |
| 64 | 3.281868e+03  | -8.319621e+02 | 6.062430e+03  |
| 65 | -2.563491e+02 | 9.274440e+03  | -4.101700e+03 |
| 66 | 8.950611e+02  | -1.959823e+03 | 7.423416e+03  |
| 67 | 3.605731e+03  | -5.205224e+03 | -4.582149e+03 |

trajectory 22

| atom | VX | VY | VZ |
|------|----|----|----|
|------|----|----|----|

trajectory 22

| atom | VX            | VY            | VZ            |
|------|---------------|---------------|---------------|
| 1    | -4.392040e+02 | -2.149992e+02 | -8.373153e+01 |
| 2    | 1.079481e+03  | 2.648864e+01  | 2.136722e+02  |
| 3    | -5.015000e+02 | 1.355551e+03  | 1.367894e+03  |
| 4    | 3.536210e+02  | -1.283740e+03 | 4.915462e+02  |
| 5    | 6.054912e+02  | 1.427683e+03  | -7.821104e+02 |
| 6    | -3.413888e+03 | 1.082610e+03  | -7.395915e+03 |
| 7    | 9.957699e+02  | -3.510810e+03 | 7.012491e+02  |
| 8    | -8.856945e+03 | 1.074099e+03  | -7.008205e+03 |
| 9    | 3.040973e+02  | 6.450077e+02  | -1.834351e+02 |
| 10   | 8.182205e+02  | -1.104963e+03 | 8.324869e+02  |
| 11   | 2.617129e+02  | -1.468838e+02 | 1.875337e+03  |
| 12   | -3.983908e+03 | 2.736655e+03  | 6.678493e+02  |
| 13   | 5.864544e+02  | 6.075940e+03  | -2.361296e+03 |
| 14   | -1.140330e+03 | -2.151327e+02 | 9.278953e+02  |

|    |               |               |               |
|----|---------------|---------------|---------------|
| 15 | 1.599803e+03  | 1.400755e+03  | -6.518117e+02 |
| 16 | -1.846020e+02 | -5.802426e+02 | 1.938918e+02  |
| 17 | 9.151173e+01  | -2.107725e+02 | 3.234006e+02  |
| 18 | 1.523216e+02  | 7.571460e+02  | -8.771410e+02 |
| 19 | 9.190473e+02  | 1.230873e+02  | 2.346261e+03  |
| 20 | -4.138392e+02 | 1.711453e+01  | -4.064553e+02 |
| 21 | 6.122415e+02  | -1.424325e+02 | 3.839490e+02  |
| 22 | -1.452274e+03 | -5.863317e+01 | -1.885395e+03 |
| 23 | 1.074617e+03  | 1.946137e+02  | -7.799645e+02 |
| 24 | 8.593331e+01  | -8.766342e+02 | -1.442572e+02 |
| 25 | -2.410169e+01 | 8.175371e+02  | -6.019864e+02 |
| 26 | -9.383985e+02 | 4.301746e+02  | 1.522954e+03  |
| 27 | 6.111961e+02  | -5.107591e+02 | -7.594419e+02 |
| 28 | -2.078583e+02 | -6.218025e+02 | 7.293718e+02  |
| 29 | 6.110877e+00  | -1.425958e+03 | -9.461744e+02 |
| 30 | 1.749803e+03  | 9.125472e+02  | -5.340962e+02 |
| 31 | -1.998930e+03 | -5.425993e+01 | 2.354716e+02  |
| 32 | 3.875063e+02  | -7.692868e+02 | -1.058142e+03 |
| 33 | -2.219974e+03 | 4.476024e+03  | 4.643105e+03  |
| 34 | 3.713228e+03  | 4.444598e+03  | -2.416538e+03 |
| 35 | 1.503312e+03  | -6.239886e+02 | 8.361029e+03  |
| 36 | -2.291482e+03 | -2.531655e+03 | -6.143345e+03 |
| 37 | -4.233656e+03 | -4.361091e+03 | 3.798615e+03  |
| 38 | 3.975709e+03  | 7.579434e+03  | -6.820693e+03 |
| 39 | 1.228530e+02  | 2.738626e+03  | -7.044089e+03 |
| 40 | -1.702682e+03 | 4.097155e+03  | 3.589324e+03  |
| 41 | -5.301453e+02 | 2.160924e+02  | -1.150690e+02 |
| 42 | 7.809718e+02  | 2.780111e+02  | 5.085806e+02  |
| 43 | -4.937374e+02 | 3.397563e+02  | -4.565957e+01 |
| 44 | 1.297990e+03  | 7.654137e+02  | -1.217460e+01 |
| 45 | -1.023178e+03 | 1.085986e+03  | -1.013687e+03 |
| 46 | -1.470787e+03 | -7.970666e+02 | 7.834549e+01  |
| 47 | -6.543876e+02 | -1.116705e+04 | 9.308796e+02  |
| 48 | -1.709532e+03 | 1.849433e+02  | 4.464685e+03  |
| 49 | 7.820013e+03  | -5.703323e+03 | 3.821978e+03  |
| 50 | 7.505820e+03  | -2.353247e+03 | 9.354517e+02  |
| 51 | -1.871242e+03 | -1.314262e+03 | 6.114056e+03  |
| 52 | 4.270873e+02  | 8.157631e+02  | -6.059840e+02 |
| 53 | 1.387185e+03  | 1.306641e+03  | -1.197648e+03 |
| 54 | -1.259204e+03 | -2.028483e+02 | -1.720944e+03 |
| 55 | 5.617618e+02  | -1.413402e+03 | -6.009525e+02 |
| 56 | -4.093165e+03 | -2.949904e+02 | 2.033132e+03  |
| 57 | -5.526566e+02 | -2.678488e+03 | 2.003142e+03  |
| 58 | 6.120647e+03  | 3.058858e+03  | -9.504747e+03 |
| 59 | -1.914599e+03 | -2.041166e+03 | 1.105164e+03  |
| 60 | -4.098471e+03 | 5.100332e+03  | 6.539237e+03  |

|    |               |               |               |
|----|---------------|---------------|---------------|
| 61 | -7.324881e+03 | 1.191820e+03  | 2.655488e+02  |
| 62 | 2.827296e+03  | 2.007106e+03  | 9.346577e+03  |
| 63 | 2.751721e+03  | 3.054080e+03  | 1.898885e+03  |
| 64 | 2.448268e+03  | -2.093873e+02 | 1.028242e+03  |
| 65 | -4.137190e+03 | 4.903892e+03  | -7.167232e+03 |
| 66 | 3.212922e+03  | -4.994156e+03 | 3.365679e+03  |
| 67 | 4.412921e+03  | 3.360980e+03  | -4.388604e+02 |

trajectory 23

| atom | VX | VY | VZ |
|------|----|----|----|
|------|----|----|----|

trajectory 23

| atom | VX            | VY            | VZ            |
|------|---------------|---------------|---------------|
| 1    | -2.242270e+02 | 8.789613e+00  | 3.919133e+01  |
| 2    | 2.158157e+03  | 4.356018e+02  | 4.340568e+02  |
| 3    | 9.449584e+02  | -1.640199e+03 | -4.582040e+02 |
| 4    | 6.179835e+02  | 1.521297e+03  | 1.464465e+02  |
| 5    | 6.537866e+02  | -7.717021e+02 | -6.770608e+02 |
| 6    | -7.714738e+03 | -4.774916e+03 | 5.307143e+03  |
| 7    | 3.894456e+03  | 4.476395e+03  | -9.301717e+02 |
| 8    | 3.720666e+03  | -3.666129e+03 | -1.824943e+03 |
| 9    | -3.476536e+02 | 2.629128e+02  | 9.887742e+02  |
| 10   | -1.814747e+03 | -3.728929e+02 | 2.683809e+02  |
| 11   | -3.999245e+01 | -8.215544e+02 | -1.050879e+03 |
| 12   | 1.445071e+02  | 4.357073e+03  | 3.923984e+02  |
| 13   | 1.342026e+03  | 4.785922e+03  | -6.844730e+03 |
| 14   | 5.853068e+02  | 2.478349e+02  | -9.041698e+02 |
| 15   | -1.472205e+02 | -1.758922e+02 | 1.035163e+03  |
| 16   | -3.587751e+02 | 1.741071e+02  | -4.242701e+02 |
| 17   | 6.466323e+01  | -3.035354e+02 | -4.082203e+01 |
| 18   | -1.403247e+03 | 7.582928e+02  | 1.309644e+02  |
| 19   | 1.901601e+03  | -1.381691e+03 | 1.002680e+03  |
| 20   | 6.197559e+02  | 7.398433e+02  | 7.276608e+02  |
| 21   | 5.007430e+02  | 1.061108e+03  | 7.889972e+01  |
| 22   | -7.365342e+00 | 5.203477e+02  | -8.520569e+02 |
| 23   | -1.033260e+03 | -5.991706e+02 | 8.520745e+02  |
| 24   | -1.211667e+03 | -3.430418e+02 | 4.485300e+02  |
| 25   | 1.318238e+02  | 1.288715e+03  | -5.853597e+02 |
| 26   | 5.833184e+01  | -7.846580e+02 | -7.049162e+02 |
| 27   | 1.085610e+03  | -1.269020e+03 | 8.643821e+02  |
| 28   | 3.682530e+02  | -3.301458e+02 | -5.105083e+02 |
| 29   | -1.118927e+03 | -1.432428e+02 | 1.127041e+03  |

|    |               |               |               |
|----|---------------|---------------|---------------|
| 30 | 6.018266e+02  | 1.509321e+03  | 4.406952e+02  |
| 31 | -8.478699e+02 | 8.033237e+02  | -5.678297e+02 |
| 32 | 2.918825e+02  | 2.428997e+02  | -3.350702e+02 |
| 33 | 2.170838e+03  | -2.780646e+03 | 6.236027e+02  |
| 34 | -4.219669e+03 | -7.598145e+03 | 2.370870e+03  |
| 35 | 1.167029e+04  | -1.329368e+03 | -8.874164e+02 |
| 36 | -2.204215e+03 | 1.861658e+02  | -2.775662e+03 |
| 37 | -8.913043e+02 | 4.619295e+03  | -2.580533e+02 |
| 38 | -6.719801e+03 | -4.547252e+03 | 2.970210e+03  |
| 39 | 7.377002e+03  | -1.267117e+03 | 3.401942e+03  |
| 40 | -4.246917e+03 | 2.906473e+03  | -1.041309e+03 |
| 41 | -1.971302e+02 | 1.390339e+03  | 1.982743e+03  |
| 42 | -1.440432e+03 | -1.093187e+03 | 2.099364e+02  |
| 43 | 2.899787e+02  | 1.630715e+03  | -3.694240e+02 |
| 44 | 7.477475e+02  | 1.672866e+03  | -1.095007e+03 |
| 45 | -8.023777e+01 | -1.518859e+03 | 1.447661e+02  |
| 46 | 6.438122e+02  | 4.728896e+02  | 8.286289e+01  |
| 47 | -7.139627e+03 | 2.632125e+03  | -3.532673e+03 |
| 48 | -4.205316e+03 | -1.366988e+03 | 1.144687e+03  |
| 49 | 2.019347e+03  | -8.059248e+03 | 2.300657e+03  |
| 50 | 6.924887e+03  | -7.784818e+03 | 8.215741e+03  |
| 51 | 3.542299e+03  | -3.204547e+03 | -1.247567e+03 |
| 52 | 1.141996e+03  | 1.039762e+03  | -1.499523e+03 |
| 53 | 3.743912e+02  | 1.909889e+02  | 4.588760e+02  |
| 54 | -1.030820e+03 | 3.024832e+02  | -1.191304e+02 |
| 55 | 4.992804e+02  | -1.515036e+01 | -9.326689e+02 |
| 56 | 5.142107e+02  | 4.902283e+03  | -7.624292e+01 |
| 57 | -4.340090e+03 | 1.203374e+03  | -3.108277e+03 |
| 58 | -8.193286e+03 | -8.783899e+03 | 6.878759e+02  |
| 59 | -7.277468e+03 | 4.069127e+02  | 8.113610e+03  |
| 60 | 4.489517e+03  | 1.179951e+03  | -3.186549e+03 |
| 61 | -1.494894e+02 | -3.157726e+03 | -9.576102e+02 |
| 62 | -1.791289e+03 | -4.053831e+03 | -1.005747e+03 |
| 63 | -6.378707e+03 | -6.542232e+03 | -4.317113e+03 |
| 64 | 4.680598e+03  | 2.205776e+03  | 1.869644e+03  |
| 65 | 4.897472e+03  | 3.029509e+02  | -3.222209e+03 |
| 66 | -5.512734e+03 | -5.289203e+03 | -1.132158e+04 |
| 67 | 3.381280e+02  | -1.505904e+03 | -3.856274e+01 |

trajectory 24

| atom | VX            | VY            | VZ            |
|------|---------------|---------------|---------------|
| 1    | 3.732605e+02  | 1.288021e+02  | 1.047822e+02  |
| 2    | -6.776305e+02 | -6.837222e+02 | 1.124867e+03  |
| 3    | -4.869425e+02 | 1.171951e+03  | -4.160668e+02 |

|    |               |               |               |
|----|---------------|---------------|---------------|
| 4  | 5.897018e+02  | 1.642375e+02  | -7.352454e+02 |
| 5  | 2.548986e+02  | 1.029100e+03  | -5.732959e+02 |
| 6  | -2.052780e+03 | -2.380538e+03 | -1.130717e+03 |
| 7  | -7.911320e+03 | 4.320121e+03  | -3.654079e+03 |
| 8  | 6.960685e+03  | 2.776725e+03  | 6.630110e+03  |
| 9  | 2.684295e+02  | 2.729716e+02  | 1.658909e+03  |
| 10 | -3.829930e+02 | 6.583908e+01  | -8.432530e+02 |
| 11 | -3.975531e+02 | 1.359491e+02  | 1.043459e+03  |
| 12 | 2.312801e+03  | 2.032874e+03  | -1.636000e+03 |
| 13 | 5.469291e+03  | 7.793122e+03  | -1.447959e+03 |
| 14 | -6.331212e+02 | 7.372556e+01  | -1.302831e+03 |
| 15 | 7.787274e+02  | -8.671307e+02 | -9.781023e+02 |
| 16 | -4.608478e+02 | 1.181111e+02  | 3.715924e+02  |
| 17 | 7.813509e+01  | -1.161026e+02 | 2.833221e+02  |
| 18 | -6.212196e+02 | 4.765259e+02  | 4.521673e+02  |
| 19 | 1.473696e+03  | -1.176038e+03 | -1.073093e+03 |
| 20 | 3.790161e+02  | -7.220132e+00 | -2.719298e+02 |
| 21 | -3.425935e+01 | -1.692433e+02 | -8.769419e+02 |
| 22 | 1.296446e+02  | -9.883174e+02 | -6.261036e+02 |
| 23 | 7.702144e+02  | 3.027374e+02  | -5.330189e+02 |
| 24 | -6.984945e+02 | -1.096211e+03 | 4.288796e+02  |
| 25 | 6.155573e+02  | 5.049780e+02  | -1.498283e+03 |
| 26 | -3.437872e+01 | -3.655440e+02 | 4.004812e+01  |
| 27 | 9.316543e+02  | 4.005161e+02  | 3.088823e+01  |
| 28 | -1.126095e+03 | 1.102617e+03  | -5.446063e+02 |
| 29 | 6.754810e+02  | -1.567596e+03 | 6.026128e+02  |
| 30 | 6.399398e+02  | 4.215942e+02  | 1.219707e+02  |
| 31 | 1.747189e+02  | 4.233090e+02  | -8.678971e+00 |
| 32 | 4.441492e+02  | -5.725331e+02 | 9.105868e+02  |
| 33 | -1.726696e+03 | 2.472288e+03  | -6.927915e+02 |
| 34 | 8.609692e+03  | 5.210605e+02  | -3.824282e+03 |
| 35 | -3.131145e+03 | -8.966155e+03 | -4.957713e+03 |
| 36 | -4.394231e+03 | -1.691892e+02 | -1.127649e+03 |
| 37 | -1.387637e+03 | 5.434539e+03  | 5.564930e+03  |
| 38 | -4.389164e+03 | -4.181646e+03 | 3.336661e+03  |
| 39 | -6.653628e+03 | -5.250389e+03 | 3.584168e+02  |
| 40 | -4.236184e+03 | 8.264254e+03  | -4.357010e+03 |
| 41 | -1.431362e+03 | 7.172438e+02  | -1.549876e+03 |
| 42 | -1.029698e+03 | -1.833968e+02 | 7.576825e+02  |
| 43 | 6.887495e+02  | -1.727411e+03 | 1.309385e+02  |
| 44 | -8.204128e+02 | -8.715577e+02 | 2.640498e+02  |
| 45 | -1.042942e+03 | 1.889292e+03  | 3.164227e+02  |
| 46 | 6.590763e+02  | -7.098166e+02 | -6.157004e+02 |
| 47 | -8.711391e+03 | 1.662980e+03  | 2.627656e+03  |
| 48 | -7.098229e+03 | 6.178485e+02  | 6.945930e+02  |
| 49 | 1.154217e+04  | -3.507304e+03 | -4.000384e+03 |

|    |               |               |               |
|----|---------------|---------------|---------------|
| 50 | -1.385012e+03 | -3.373590e+03 | -5.861493e+03 |
| 51 | -4.726715e+03 | -1.505082e+03 | 3.009661e+03  |
| 52 | -1.416626e+03 | 3.157347e+02  | 2.804863e+02  |
| 53 | -5.249603e+02 | -7.178706e+02 | 5.539695e+02  |
| 54 | -1.713936e+02 | 1.784400e+03  | 1.169299e+03  |
| 55 | -9.331352e+02 | -2.042068e+02 | 1.586496e+03  |
| 56 | -5.062883e+03 | 1.565648e+03  | -2.024958e+03 |
| 57 | -6.589577e+01 | 2.417231e+03  | -4.685708e+03 |
| 58 | 9.993911e+03  | 3.992063e+03  | -2.560142e+03 |
| 59 | 2.229077e+03  | -1.805336e+03 | -2.150518e+03 |
| 60 | -3.665889e+03 | -4.396770e+03 | -7.196198e+03 |
| 61 | 6.172190e+03  | 4.547002e+03  | 1.725317e+02  |
| 62 | -4.621249e+03 | -2.929416e+03 | -1.682714e+03 |
| 63 | 4.667061e+03  | -3.653699e+02 | -3.249298e+03 |
| 64 | 8.668497e+03  | -9.173346e+03 | -6.902445e+02 |
| 65 | -3.798556e+03 | 9.687634e+03  | 1.778699e+03  |
| 66 | 1.818945e+03  | -2.514275e+03 | 3.641529e+03  |
| 67 | 3.420415e+03  | -1.597795e+03 | -2.702167e+02 |

trajectory 25

| atom | VX            | VY            | VZ            |
|------|---------------|---------------|---------------|
| 1    | -2.364937e+02 | 2.224805e+02  | -2.764167e+02 |
| 2    | -3.268056e+02 | -8.140391e+02 | 1.548291e+03  |
| 3    | -1.603765e+02 | -1.140265e+03 | -1.614390e+03 |
| 4    | 2.374098e+02  | 1.526670e+03  | 1.399306e+03  |
| 5    | -7.257045e+02 | 5.671893e+02  | -1.397085e+03 |
| 6    | -9.890149e+02 | -5.023535e+03 | -7.324761e+02 |
| 7    | -1.420153e+03 | 3.620822e+02  | 3.614482e+03  |
| 8    | 6.917071e+03  | 6.718471e+03  | 2.444821e+03  |
| 9    | -3.797019e+02 | -1.511768e+02 | -2.378381e+02 |
| 10   | -1.182850e+03 | -4.095463e+02 | 7.222922e+02  |
| 11   | 7.843371e+01  | 3.590372e+02  | -1.303891e+03 |
| 12   | -5.742667e+02 | -3.188066e+03 | 7.175068e+03  |
| 13   | -3.258378e+03 | 2.694383e+03  | -2.051185e+03 |
| 14   | 9.229343e+02  | -2.920991e+02 | 6.390624e-01  |
| 15   | -7.604026e+02 | 4.304010e+02  | 1.045279e+03  |
| 16   | -1.446383e+03 | 5.204343e+02  | 5.088334e+02  |
| 17   | 1.484852e+02  | -2.778307e+02 | -2.123696e+01 |
| 18   | -3.120623e+02 | -7.852818e+02 | -1.602080e+01 |
| 19   | 1.476653e+03  | 3.276381e+02  | -4.034205e+02 |
| 20   | -3.238924e+02 | -2.073140e+02 | 1.863451e+01  |
| 21   | -3.001119e+02 | 7.379998e+02  | 7.548849e+01  |
| 22   | -3.569542e+02 | 1.272112e+03  | 1.115742e+03  |
| 23   | 1.369245e+02  | -9.004378e+02 | 1.508981e+02  |



|    |               |               |               |
|----|---------------|---------------|---------------|
| 24 | -1.775898e+02 | -1.423939e+02 | -1.072509e+02 |
| 25 | 1.408542e+03  | 2.190470e+03  | 8.526716e+02  |
| 26 | 1.230925e+02  | 2.328202e+02  | -2.298887e+02 |
| 27 | 6.929225e+01  | 1.296923e+02  | -2.198219e+02 |
| 28 | 1.310818e+03  | 4.155689e+02  | 3.716879e+01  |
| 29 | -1.915610e+03 | -3.249203e+02 | -8.143473e+02 |
| 30 | 6.623706e+02  | 1.476734e+03  | 5.240847e+02  |
| 31 | -6.643320e+02 | -1.969515e+03 | 1.286224e+03  |
| 32 | -8.647078e+02 | 1.412790e+03  | -1.989856e+01 |
| 33 | -4.565244e+03 | 1.450694e+03  | -5.419690e+03 |
| 34 | 8.915531e+03  | -1.312998e+02 | 3.051303e+03  |
| 35 | 1.955153e+03  | -7.668456e+03 | -1.275816e+03 |
| 36 | 2.384748e+03  | -4.062117e+03 | -5.587006e+03 |
| 37 | 5.979484e+03  | -8.358401e+02 | 2.112594e+03  |
| 38 | 1.139141e+04  | 2.453345e+03  | 1.459471e+03  |
| 39 | -4.931470e+02 | 1.777466e+03  | -3.334646e+03 |
| 40 | -5.035431e+03 | 3.978402e+03  | 8.784914e+02  |
| 41 | -3.811068e+02 | -6.456819e+02 | 5.389623e+02  |
| 42 | -1.418410e+02 | -8.811897e+02 | 9.871820e+02  |
| 43 | 1.164144e+03  | -7.547687e+01 | 5.727418e+02  |
| 44 | 1.242781e+02  | -8.803894e+02 | 1.701733e+02  |
| 45 | -4.163347e+02 | 2.238868e+03  | -5.908481e+02 |
| 46 | -2.233586e+02 | -1.052472e+03 | -8.577171e+02 |
| 47 | 7.527650e+03  | 5.096258e+03  | -8.762235e+02 |
| 48 | -3.223509e+03 | -5.439015e+03 | 2.306874e+03  |
| 49 | 5.487458e+03  | -4.085177e+03 | 1.453260e+03  |
| 50 | 3.118089e+03  | -8.225372e+03 | -1.352836e+02 |
| 51 | -4.554894e+02 | 6.301654e+03  | -1.112645e+03 |
| 52 | 2.376210e+03  | -1.253076e+03 | 1.263088e+03  |
| 53 | -1.007008e+03 | 3.546687e+02  | -2.328379e+03 |
| 54 | 1.527610e+03  | -8.455914e+02 | -1.517465e+03 |
| 55 | 3.151148e+02  | 8.090198e+02  | 2.664516e+02  |
| 56 | -6.557746e+02 | -6.747879e+02 | -6.504770e+02 |
| 57 | -1.060314e+04 | 5.662617e+03  | 2.008632e+03  |
| 58 | -2.088917e+02 | -5.624886e+03 | 3.216285e+03  |
| 59 | -9.086577e+02 | -2.322581e+03 | 1.040623e+04  |
| 60 | 2.203628e+03  | -3.284304e+02 | -3.126175e+03 |
| 61 | -3.400986e+03 | -1.490867e+03 | 2.116803e+03  |
| 62 | 7.244448e+01  | -1.019580e+03 | -1.130574e+03 |
| 63 | 2.726522e+03  | -3.377562e+03 | -4.631002e+03 |
| 64 | -1.025062e+04 | 7.187384e+02  | -1.278340e+03 |
| 65 | 7.522297e+03  | -7.986320e+03 | 4.911877e+02  |
| 66 | 6.338743e+02  | 4.098043e+02  | -5.048672e+03 |
| 67 | -4.172537e+03 | 7.813325e+02  | 8.796359e+02  |

trajectory 26

| atom | VX            | VY            | VZ            |
|------|---------------|---------------|---------------|
| 1    | 4.295020e+02  | -1.557498e+02 | -2.805457e+00 |
| 2    | 5.763876e+02  | 4.804231e+01  | 2.912029e+01  |
| 3    | -2.553669e+02 | -9.164160e+01 | 2.448130e+02  |
| 4    | 7.614611e+02  | 1.305078e+03  | 1.061532e+03  |
| 5    | 1.371016e+03  | -9.136479e+02 | -5.686609e+02 |
| 6    | -1.291908e+02 | -1.803001e+03 | 3.227929e+03  |
| 7    | -4.462944e+03 | 6.264781e+03  | 1.772698e+03  |
| 8    | -5.908300e+03 | 3.930448e+03  | -5.025649e+03 |
| 9    | -2.732949e+02 | 1.015264e+02  | -1.671695e+03 |
| 10   | 1.247320e+03  | -5.827343e+02 | -9.545680e+01 |
| 11   | -1.573856e+02 | -1.035182e+03 | 5.756423e+02  |
| 12   | -3.137673e+03 | -9.252145e+03 | 2.874317e+03  |
| 13   | -1.978285e+03 | 3.275322e+03  | -3.037261e+02 |
| 14   | -5.217228e+02 | 2.720739e+02  | 1.601512e+03  |
| 15   | 2.530093e+01  | 4.081451e+02  | -7.687321e+02 |
| 16   | 5.353815e+02  | 2.090054e+02  | -2.143264e+02 |
| 17   | -5.985802e+01 | 4.746760e+01  | -2.072148e+02 |
| 18   | 5.191456e+02  | 4.402603e+02  | -8.811501e+02 |
| 19   | -1.514684e+03 | -2.171359e+02 | 8.574007e+02  |
| 20   | 1.360811e+03  | -7.859956e+02 | -5.527721e+02 |
| 21   | -1.250902e+03 | 1.889008e+02  | -9.257785e+01 |
| 22   | 2.137681e+02  | -7.348558e+01 | 3.294544e+02  |
| 23   | 7.854983e+02  | 5.788744e+00  | 7.045246e+02  |
| 24   | 9.427818e+02  | -1.416304e+03 | -2.627343e+02 |
| 25   | -1.290315e+03 | 4.581965e+02  | 2.085933e+03  |
| 26   | 1.023131e+03  | -5.881423e+02 | -7.978246e+02 |
| 27   | -2.342035e+02 | -8.251940e+02 | -1.781824e+02 |
| 28   | -3.017436e+02 | 1.141242e+03  | 1.270641e+03  |
| 29   | 8.120707e+02  | -4.903897e+02 | -1.302325e+03 |
| 30   | -1.204792e+03 | -3.463121e+02 | -6.186045e+02 |
| 31   | 5.813114e+02  | -8.965498e+01 | 6.919159e+02  |
| 32   | -4.063558e+02 | 3.112170e+02  | -7.963234e+02 |
| 33   | -2.925416e+03 | 6.062224e+03  | 2.353763e+03  |
| 34   | 8.646049e+03  | 1.324794e+03  | -2.264222e+03 |
| 35   | -5.953684e+03 | 3.510204e+03  | 4.184821e+03  |
| 36   | 2.726442e+03  | 3.137171e+03  | 1.428877e+03  |
| 37   | 3.440771e+03  | -5.912852e+03 | 3.190036e+03  |
| 38   | -3.059210e+03 | 8.591238e+02  | -1.853841e+03 |
| 39   | -5.932079e+03 | -2.263871e+02 | -3.158622e+03 |
| 40   | -4.098658e+03 | 8.744367e+02  | 1.286796e+04  |
| 41   | 2.386131e+02  | 1.689746e+03  | -5.930267e+02 |
| 42   | -2.723158e+03 | 1.953635e+03  | -1.190018e+02 |
| 43   | -5.630851e+02 | -4.060146e+02 | 1.750314e+03  |

|    |               |               |               |
|----|---------------|---------------|---------------|
| 44 | -1.484038e+02 | -7.776526e+02 | 3.905546e+02  |
| 45 | -8.359256e+02 | -3.566936e+02 | -1.194678e+03 |
| 46 | 2.064973e+03  | -1.123707e+03 | -8.086442e+01 |
| 47 | -1.154603e+03 | -3.136935e+03 | 9.433110e+02  |
| 48 | 5.066310e+03  | 4.424135e+03  | -2.373955e+03 |
| 49 | -6.102433e+03 | 1.590960e+03  | 6.058196e+02  |
| 50 | 1.218235e+03  | 1.086341e+04  | -1.357723e+03 |
| 51 | -3.498619e+03 | 2.639994e+03  | 4.934594e+03  |
| 52 | -1.664484e+03 | -1.354464e+02 | -1.077112e+03 |
| 53 | -7.567872e+02 | -4.845556e+02 | -1.056960e+03 |
| 54 | -1.119515e+03 | -9.452676e+02 | 2.659268e+02  |
| 55 | 3.008744e+02  | 5.962900e+01  | 1.106336e+03  |
| 56 | 9.856470e+03  | 2.156426e+02  | 3.625876e+03  |
| 57 | 5.980723e+03  | 7.865528e+01  | 3.754112e+03  |
| 58 | -3.416916e+03 | -2.158216e+03 | -3.910185e+03 |
| 59 | -8.481081e+03 | 4.459467e+03  | 7.509433e+03  |
| 60 | -4.050063e+03 | -7.373958e+02 | -2.144438e+03 |
| 61 | -4.367993e+03 | 5.332849e+03  | 3.662558e+01  |
| 62 | 3.571016e+02  | 3.837825e+02  | -1.730185e+03 |
| 63 | 7.102366e+03  | 7.048729e+03  | -1.471429e+03 |
| 64 | -4.436911e+03 | -1.734523e+03 | 2.455525e+03  |
| 65 | 2.979768e+03  | 7.017255e+03  | -5.314886e+03 |
| 66 | -5.217603e+02 | 2.197077e+03  | -5.859106e+03 |
| 67 | -4.738420e+03 | -1.565505e+03 | 6.289782e+03  |

trajectory 27

| atom | VX            | VY            | VZ            |
|------|---------------|---------------|---------------|
| 1    | -1.715673e+02 | 2.053472e+02  | -5.148627e+02 |
| 2    | -1.030386e+03 | -6.521497e+02 | -7.022199e+02 |
| 3    | -1.013483e+03 | 8.280370e+02  | -8.336502e+02 |
| 4    | 6.950140e+02  | -1.508394e+03 | 7.290570e+02  |
| 5    | 1.665223e+03  | 4.021125e+02  | -9.523587e+02 |
| 6    | -7.750779e+02 | 4.168890e+03  | 1.261550e+03  |
| 7    | 6.446304e+02  | 9.513616e+03  | 1.483117e+03  |
| 8    | -4.486259e+03 | -2.105329e+03 | -9.958125e+02 |
| 9    | -1.257061e+03 | 1.455942e+02  | 1.323042e+03  |
| 10   | -2.281232e+02 | 1.917049e+03  | 1.895260e+02  |
| 11   | 1.542987e+03  | 6.647974e+02  | -1.524373e+03 |
| 12   | -1.803272e+03 | -7.566148e+02 | 1.152452e+03  |
| 13   | -9.826632e+02 | -3.357072e+03 | 4.324014e+03  |
| 14   | 1.292147e+03  | -3.634184e+02 | -5.074585e+02 |
| 15   | -1.165437e+03 | 1.762355e+02  | 1.025127e+03  |
| 16   | 5.775969e+02  | 6.170221e+02  | 4.897221e+02  |
| 17   | -2.703786e+02 | -1.508174e+02 | 1.903544e+01  |

|    |               |               |               |
|----|---------------|---------------|---------------|
| 18 | -9.993601e+02 | -1.135352e+03 | 7.677707e+02  |
| 19 | 5.891286e+02  | -1.405318e+03 | 6.127402e+02  |
| 20 | 1.145574e+03  | 6.745890e+02  | 4.589941e+02  |
| 21 | 3.428839e+02  | 8.845415e+02  | -7.071447e+02 |
| 22 | -5.980153e+02 | -5.260620e+02 | -4.400371e+02 |
| 23 | 9.702145e+02  | -3.758825e+02 | 3.894517e+02  |
| 24 | 5.090752e+02  | -6.422640e+02 | 2.047939e+02  |
| 25 | -1.364115e+02 | 1.209072e+02  | -3.069949e+02 |
| 26 | -9.956972e+02 | -5.225549e+02 | 7.568928e+02  |
| 27 | 1.170449e+03  | 1.458849e+03  | 1.293029e+02  |
| 28 | 6.951319e+02  | -8.652849e+02 | -2.171628e+03 |
| 29 | -5.487702e+02 | 9.980778e+02  | -4.800402e+02 |
| 30 | -6.333016e+02 | -4.111159e+02 | 8.505474e+02  |
| 31 | -4.721679e+02 | -9.878794e+01 | -5.054513e+02 |
| 32 | -2.891393e+01 | 1.974128e+02  | -4.725801e+02 |
| 33 | -7.660503e+03 | -1.420716e+03 | 2.038518e+03  |
| 34 | -3.631851e+03 | -5.880870e+03 | 7.416977e+03  |
| 35 | 2.922817e+02  | -1.239169e+03 | -4.668258e+03 |
| 36 | 1.927178e+03  | 3.585447e+03  | 8.104570e+03  |
| 37 | 1.592686e+03  | -7.231360e+03 | 2.441550e+03  |
| 38 | -3.881558e+03 | 3.246040e+03  | 7.083652e+03  |
| 39 | 2.039994e+03  | 2.445486e+03  | -4.285451e+03 |
| 40 | 3.101087e+03  | -7.479979e+03 | -3.187434e+03 |
| 41 | 4.491179e+02  | -2.447650e+03 | 1.108190e+03  |
| 42 | 1.406683e+03  | -1.238460e+03 | 3.089973e+02  |
| 43 | -1.242101e+03 | 1.495256e+03  | 1.703093e+02  |
| 44 | 9.562630e+02  | 5.638276e+02  | -1.092897e+03 |
| 45 | 1.882634e+03  | -4.594781e+02 | -1.850056e+02 |
| 46 | -4.120428e+02 | 3.556185e+02  | 5.660533e+02  |
| 47 | 3.107293e+03  | 6.085345e+03  | -2.216728e+02 |
| 48 | -1.052692e+03 | -3.489325e+03 | 6.080708e+03  |
| 49 | -2.121311e+03 | -1.015577e+03 | 5.681477e+03  |
| 50 | 2.687385e+03  | 1.580417e+03  | -4.600339e+03 |
| 51 | 8.549544e+03  | 6.640630e+03  | -4.881315e+03 |
| 52 | 2.406166e+01  | 1.548677e+03  | 1.741166e+02  |
| 53 | -3.403522e+02 | 1.586771e+02  | 3.801785e+02  |
| 54 | 8.384667e+01  | 7.528947e+02  | -2.576083e+02 |
| 55 | -9.958754e+02 | -9.172186e+01 | 2.307398e+02  |
| 56 | -7.066941e+03 | -9.846114e+02 | 2.887415e+03  |
| 57 | 3.665108e+02  | -9.551689e+03 | 1.732552e+03  |
| 58 | -3.816142e+03 | -4.929898e+03 | 4.470800e+03  |
| 59 | -4.487993e+02 | -5.635292e+03 | 3.909054e+03  |
| 60 | 4.596394e+03  | 7.091976e+03  | 1.741416e+03  |
| 61 | -5.216333e+03 | -6.172963e+03 | -5.326785e+03 |
| 62 | -1.464891e+03 | 6.168648e+01  | -6.837811e+02 |
| 63 | 4.973492e+02  | 2.199331e+03  | -2.797019e+03 |

|    |               |               |               |
|----|---------------|---------------|---------------|
| 64 | -8.094383e+03 | 8.565669e+03  | 4.460978e+03  |
| 65 | 1.515952e+03  | -4.526397e+02 | -4.236212e+03 |
| 66 | 8.319471e+03  | -1.692927e+03 | 5.450420e+03  |
| 67 | 2.930698e+03  | -3.009655e+03 | 2.590547e+03  |

trajectory 28

| atom | VX            | VY            | VZ            |
|------|---------------|---------------|---------------|
| 1    | 1.580065e+02  | -1.380626e+02 | -2.313612e+02 |
| 2    | -4.899631e+02 | -5.274906e+02 | -2.292131e+02 |
| 3    | 9.351202e+02  | 5.692086e+01  | 9.820045e+02  |
| 4    | 2.887200e+00  | 1.302554e+03  | 8.079785e+02  |
| 5    | -1.192553e+03 | 8.795688e+02  | -6.549512e+02 |
| 6    | 4.934135e+03  | 1.594572e+03  | 3.723262e+03  |
| 7    | 4.403343e+03  | -4.857930e+02 | -1.026388e+03 |
| 8    | -1.015876e+04 | -4.022535e+03 | -3.075681e+03 |
| 9    | 5.450170e+02  | -5.312341e+02 | -1.130829e+03 |
| 10   | -2.052909e+02 | -4.088978e+02 | 1.065120e+03  |
| 11   | -7.492298e+02 | 2.350561e+03  | 6.111465e+01  |
| 12   | 3.480045e+03  | -2.423888e+03 | 7.866695e+03  |
| 13   | 1.366973e+03  | 2.491410e+03  | 1.621450e+03  |
| 14   | -1.172179e+03 | 1.025524e+03  | -9.424910e+01 |
| 15   | 3.692398e+02  | -1.573113e+02 | 1.657269e+03  |
| 16   | -2.396124e+02 | -3.766524e+02 | -3.118004e+02 |
| 17   | 9.626054e+00  | -1.760186e+02 | -1.448678e+02 |
| 18   | 1.423217e+03  | 1.173379e+02  | 3.721233e+02  |
| 19   | -2.204229e+03 | 2.699913e+02  | -1.473292e+03 |
| 20   | -3.508904e+02 | -5.085574e+02 | -4.879919e+02 |
| 21   | 2.441817e+02  | 1.450781e+03  | -2.357100e+02 |
| 22   | -3.950960e+02 | 7.643414e+00  | 1.017935e+03  |
| 23   | -1.523915e+03 | -2.694286e+02 | 9.061305e+02  |
| 24   | 9.577826e+02  | 6.717143e+02  | 5.331820e+02  |
| 25   | -4.220723e+02 | -1.438185e+02 | 3.994925e+02  |
| 26   | 2.464735e+02  | 1.430215e+02  | 3.259221e+02  |
| 27   | 8.491980e+01  | 9.784123e+02  | 4.979873e+02  |
| 28   | 1.676687e+02  | 9.352744e+02  | -3.907079e+01 |
| 29   | -2.882861e+02 | -2.743405e+02 | 7.178435e+02  |
| 30   | 1.004046e+02  | -2.006014e+02 | 4.392702e+02  |
| 31   | 2.264979e+03  | -3.024938e+02 | -1.069643e+02 |
| 32   | 4.909633e+02  | 7.551178e+02  | -1.332062e+03 |
| 33   | -9.497518e+02 | -7.342668e+03 | -1.057108e+03 |
| 34   | 4.767205e+03  | 1.283518e+03  | -4.270007e+03 |
| 35   | 2.665971e+03  | 8.727360e+03  | -1.459989e+03 |
| 36   | -1.227380e+03 | -3.979129e+02 | -8.620666e+03 |
| 37   | -3.365046e+03 | 1.235072e+03  | -9.804112e+02 |

|    |               |               |               |
|----|---------------|---------------|---------------|
| 38 | -8.325669e+03 | -3.399345e+03 | 4.603863e+03  |
| 39 | -4.096333e+03 | -6.485753e+02 | 1.001645e+03  |
| 40 | 3.051891e+03  | -6.136876e+03 | -2.278701e+03 |
| 41 | 2.294099e+03  | -1.834104e+03 | -1.162185e+03 |
| 42 | -1.443189e+03 | -1.657656e+03 | 2.159855e+03  |
| 43 | 4.761328e+02  | 3.200189e+02  | -7.403835e+02 |
| 44 | -3.403220e+02 | 2.285192e+03  | -7.127588e+02 |
| 45 | -3.894298e+02 | -5.352288e+02 | -8.715923e+02 |
| 46 | -8.846589e+02 | -7.101212e+02 | 1.114955e+03  |
| 47 | -2.050211e+03 | 8.871415e+02  | -2.641439e+03 |
| 48 | -1.720951e+03 | 6.281350e+02  | 3.052710e+03  |
| 49 | -6.342129e+02 | -5.800397e+03 | 5.214041e+02  |
| 50 | 2.735795e+03  | -1.688368e+03 | 3.591217e+02  |
| 51 | -1.027414e+04 | -3.213230e+03 | 5.073436e+03  |
| 52 | -3.606560e+02 | 2.200830e+02  | 1.335432e+03  |
| 53 | 1.041467e+03  | 3.305688e+02  | 1.755115e+01  |
| 54 | 3.087141e+02  | -8.169997e+02 | 3.736842e+02  |
| 55 | -4.285185e+01 | -6.008160e+02 | -1.125203e+03 |
| 56 | -1.279651e+03 | -2.581651e+03 | -3.469838e+03 |
| 57 | 4.405697e+03  | 5.142653e+03  | -5.149157e+03 |
| 58 | 7.913883e+03  | 6.162404e+03  | -2.218891e+03 |
| 59 | -1.224128e+03 | -6.953987e+03 | 2.185064e+03  |
| 60 | 1.011427e+03  | 6.434437e+03  | 2.969039e+03  |
| 61 | -5.239989e+03 | -6.099538e+03 | -1.183741e+03 |
| 62 | 3.676432e+03  | 3.375426e+03  | -7.478781e+03 |
| 63 | 1.335581e+03  | -8.010433e+03 | -4.153933e+03 |
| 64 | -4.311153e+03 | -3.740957e+03 | -5.512015e+03 |
| 65 | 2.748059e+03  | -7.566850e+02 | 9.911106e+02  |
| 66 | 3.843048e+03  | -2.944198e+03 | -4.183117e+02 |
| 67 | -6.332294e+03 | -1.783127e+03 | 8.171601e+03  |

trajectory 29

| atom | VX            | VY            | VZ            |
|------|---------------|---------------|---------------|
| 1    | -1.382395e+02 | 6.392423e+02  | 7.071457e-01  |
| 2    | 1.487675e+03  | -1.032977e+03 | -3.830655e+02 |
| 3    | 1.349707e+03  | 1.602366e+03  | -5.830867e+02 |
| 4    | 4.213019e+02  | -7.303288e+02 | 1.070019e+03  |
| 5    | 7.185257e+02  | 4.049637e+01  | -1.420446e+03 |
| 6    | -1.197989e+04 | 2.202873e+03  | 1.901456e+03  |
| 7    | -4.833193e+03 | -2.375646e+03 | 3.946163e+03  |
| 8    | 1.923854e+03  | 2.217222e+03  | -3.008641e+03 |
| 9    | -7.416326e+02 | 1.517596e+02  | 1.086304e+03  |
| 10   | -8.210757e+02 | -8.117088e+02 | 3.417888e+02  |
| 11   | 3.090982e+02  | -4.695773e+02 | -5.821718e+02 |

|    |               |               |               |
|----|---------------|---------------|---------------|
| 12 | 8.630360e+03  | 2.381435e+03  | -8.208475e+02 |
| 13 | 1.390427e+03  | 5.409892e+03  | -4.195733e+03 |
| 14 | 3.626075e+02  | 5.335910e+02  | -3.439523e+01 |
| 15 | -1.833734e+03 | -9.579752e+02 | 2.857044e+00  |
| 16 | 1.396137e+03  | 3.261610e+02  | 1.082706e+02  |
| 17 | -1.127900e+02 | -3.636351e+02 | 2.588986e+02  |
| 18 | 1.340845e+03  | -5.468461e+02 | -2.253117e+02 |
| 19 | -1.537149e+02 | 6.127604e+02  | -5.517225e+02 |
| 20 | -7.157136e+02 | 9.843220e+01  | -1.465621e+03 |
| 21 | 5.920386e+01  | 8.242335e+01  | 6.772148e+01  |
| 22 | 3.048180e+02  | 1.364295e+03  | -7.743488e+02 |
| 23 | 1.639280e+02  | -1.658718e+02 | -4.483585e+02 |
| 24 | 5.568741e+02  | -1.837966e+02 | -1.356374e+03 |
| 25 | -1.150727e+02 | 1.043452e+03  | 1.388198e+02  |
| 26 | -9.209498e+02 | 1.201881e+02  | 7.715172e+01  |
| 27 | 6.633324e+02  | 2.047538e+02  | 2.863768e+02  |
| 28 | 4.410029e+02  | -1.321264e+03 | -1.197544e+03 |
| 29 | -1.360830e+03 | 8.270008e+02  | 9.882408e+01  |
| 30 | 3.126646e+03  | -1.161567e+02 | 1.286154e+03  |
| 31 | -5.393153e+02 | -1.221045e+03 | 6.295910e+01  |
| 32 | 2.791351e+02  | 1.115387e+03  | -1.373011e+03 |
| 33 | 5.070173e+01  | 2.176585e+02  | 2.881695e+03  |
| 34 | -8.359440e+03 | 7.585688e+02  | 4.444770e+03  |
| 35 | -3.488456e+03 | -2.407532e+03 | 6.442914e+03  |
| 36 | -5.532424e+03 | 4.883393e+03  | -2.411321e+03 |
| 37 | 4.113690e+03  | -6.677935e+03 | 4.231043e+03  |
| 38 | -9.248789e+02 | -1.673360e+03 | 5.870921e+03  |
| 39 | -4.551826e+03 | -3.033444e+03 | -8.938002e+02 |
| 40 | -5.256101e+03 | 2.215948e+03  | 1.625688e+03  |
| 41 | 6.858569e+02  | 3.058556e+02  | -3.293171e+02 |
| 42 | -1.776020e+03 | 5.216499e+02  | 6.389051e+02  |
| 43 | 2.055289e+02  | 6.076378e+02  | -6.025111e+02 |
| 44 | -6.869046e+02 | -5.846225e+02 | 1.094674e+03  |
| 45 | 6.505293e+02  | 9.611335e+02  | -6.242890e+02 |
| 46 | -7.163937e+02 | -7.704442e+02 | -4.530156e+02 |
| 47 | -8.059250e+02 | -3.535445e+03 | -2.271035e+03 |
| 48 | 5.183584e+03  | 2.733970e+02  | -1.805861e+03 |
| 49 | -5.592039e+03 | -7.724548e+02 | 1.054186e+03  |
| 50 | 5.882826e+03  | -7.787900e+03 | 6.505746e+03  |
| 51 | -2.478009e+03 | -3.953886e+03 | 2.125548e+03  |
| 52 | 6.510993e+02  | -1.012644e+03 | 2.035650e+03  |
| 53 | -1.108249e+03 | -2.481758e+03 | -3.645716e+02 |
| 54 | -3.060289e+02 | -3.469195e+02 | -9.144175e+01 |
| 55 | 6.473773e+02  | 8.743365e+02  | 6.173840e+02  |
| 56 | -6.683449e+03 | -3.269753e+03 | -8.076780e+03 |
| 57 | 2.232470e+03  | -2.811146e+03 | 6.120989e+03  |

|    |               |               |               |
|----|---------------|---------------|---------------|
| 58 | -1.495747e+03 | -3.591848e+03 | 3.546653e+02  |
| 59 | -1.191716e+03 | 3.338671e+03  | -2.561542e+03 |
| 60 | 3.046300e+03  | 7.234506e+03  | 3.396553e+03  |
| 61 | 3.474217e+03  | -7.153175e+02 | -4.268358e+03 |
| 62 | 5.362145e+03  | 2.841108e+03  | 1.320633e+04  |
| 63 | -1.704901e+03 | -2.576392e+03 | 1.624558e+03  |
| 64 | -1.581550e+03 | 2.253364e+03  | -3.725808e+03 |
| 65 | 2.225150e+02  | 6.948691e+03  | -4.295964e+03 |
| 66 | 2.179616e+02  | -3.164629e+03 | -5.656480e+03 |
| 67 | -5.161494e+03 | -5.544353e+03 | 1.980829e+03  |

trajectory 30

| atom | VX            | VY            | VZ            |
|------|---------------|---------------|---------------|
| 1    | 4.806136e+02  | -1.967269e+01 | -1.232557e+02 |
| 2    | -6.848534e+01 | 2.898809e+02  | 1.644916e+02  |
| 3    | -7.934139e+02 | -2.262362e+03 | 1.922409e+03  |
| 4    | -1.439538e+02 | 1.692678e+03  | -1.320429e+03 |
| 5    | 9.099890e+02  | 3.484526e+02  | 6.409332e+02  |
| 6    | 4.538923e+03  | -4.682859e+03 | -4.238073e+02 |
| 7    | -1.152748e+03 | -5.785828e+03 | 2.040752e+03  |
| 8    | -3.132447e+03 | -3.033123e+03 | -9.822564e+03 |
| 9    | 9.239332e+02  | 5.704021e+02  | 2.147101e+02  |
| 10   | 4.007252e-01  | 1.246342e+03  | -7.733034e+02 |
| 11   | -2.395170e+03 | -7.506082e+02 | 1.703339e+03  |
| 12   | 1.360898e+03  | 4.729565e+03  | -4.249215e+03 |
| 13   | -6.448193e+02 | -3.813765e+03 | -1.607904e+03 |
| 14   | -7.686710e+02 | -4.107744e+02 | 1.514383e+03  |
| 15   | 9.710071e+02  | 1.935600e+02  | -3.431993e+02 |
| 16   | 8.293923e+02  | -4.226075e+02 | -1.096831e+02 |
| 17   | -1.415741e+02 | 2.127241e+02  | -2.088236e+02 |
| 18   | -6.473580e+01 | 6.093170e+02  | -6.254566e+01 |
| 19   | -5.968989e+02 | 5.674719e+02  | -2.131703e+03 |
| 20   | -1.884606e+02 | 2.972489e-01  | 1.363155e+03  |
| 21   | -1.508595e+03 | -7.743675e+02 | -3.193079e+02 |
| 22   | 2.510897e+02  | 3.433880e+02  | -7.288958e+02 |
| 23   | -8.305701e+02 | -6.904086e+02 | 3.535334e+02  |
| 24   | 6.443857e+02  | 5.056810e+02  | 1.117699e+03  |
| 25   | -3.582242e+01 | -7.424425e+02 | 4.986892e+02  |
| 26   | -2.414293e+02 | 9.752013e+02  | 4.016314e+02  |
| 27   | -7.306492e+01 | 1.199713e+03  | -1.136207e+03 |
| 28   | -2.148902e+02 | -3.204709e+02 | -3.604825e+02 |
| 29   | 1.577300e+03  | 1.153286e+02  | -2.095756e+02 |
| 30   | 4.812217e+02  | 1.560878e+03  | -1.910030e+02 |
| 31   | -3.195594e+02 | -5.863717e+02 | -1.922873e+02 |



|    |               |               |               |
|----|---------------|---------------|---------------|
| 32 | -4.056952e+02 | -7.752219e+02 | 1.091591e+03  |
| 33 | 1.865149e+03  | 6.696480e+03  | -4.618462e+03 |
| 34 | -3.313647e+03 | -1.824889e+03 | 2.601774e+03  |
| 35 | -4.685692e+03 | -1.577732e+03 | -7.629132e+03 |
| 36 | 4.530985e+03  | -1.432508e+03 | 6.816750e+03  |
| 37 | 2.218341e+03  | 4.695189e+03  | -4.930964e+02 |
| 38 | -8.376168e+03 | -1.573151e+02 | 5.623382e+03  |
| 39 | -5.502622e+03 | 3.266521e+03  | -4.674714e+02 |
| 40 | 2.825940e+03  | -3.296011e+03 | -3.260728e+03 |
| 41 | 2.374456e+03  | -1.062193e+03 | -2.414098e+02 |
| 42 | -8.815253e+02 | 9.333896e+02  | 1.021866e+03  |
| 43 | -7.251539e+02 | -3.547490e+02 | -9.879182e+02 |
| 44 | 6.119854e+02  | -5.933922e+02 | -7.636906e+02 |
| 45 | 3.407883e+02  | -5.798865e+02 | 7.012664e+02  |
| 46 | -1.355716e+01 | -1.286336e+03 | 8.736844e+02  |
| 47 | 8.563441e+02  | 2.875261e+03  | -6.015403e+03 |
| 48 | 1.091088e+03  | -4.987898e+03 | -7.633211e+02 |
| 49 | 5.646199e+02  | 6.166193e+03  | -2.918864e+03 |
| 50 | 2.947014e+03  | 7.767765e+03  | -8.677848e+03 |
| 51 | -2.468820e+03 | -3.431048e+01 | 2.942456e+03  |
| 52 | 4.539905e+02  | -2.033746e+03 | 7.721638e+02  |
| 53 | -1.071727e+03 | -4.748504e+02 | -1.001603e+03 |
| 54 | -5.048843e+02 | 1.033742e+03  | -1.514501e+03 |
| 55 | 1.878062e+02  | -1.714595e+03 | 3.272710e+02  |
| 56 | 1.529097e+03  | 2.227469e+03  | 4.562860e+03  |
| 57 | -4.343809e+03 | 5.289603e+03  | 1.897618e+03  |
| 58 | 3.196836e+03  | 7.684025e+03  | -1.556471e+03 |
| 59 | -5.164920e+02 | -1.009887e+03 | 5.812125e+03  |
| 60 | 1.136991e+03  | 3.658681e+02  | 1.827294e+03  |
| 61 | 7.370538e+03  | -2.557311e+03 | 6.286060e+03  |
| 62 | 1.569873e+03  | 9.259938e+01  | 9.645269e+03  |
| 63 | 2.768635e+02  | -2.965530e+03 | -2.518952e+03 |
| 64 | -3.400309e+03 | -1.641560e+03 | 1.321882e+03  |
| 65 | -4.035609e+03 | 1.921720e+03  | -9.447375e+03 |
| 66 | -3.544270e+03 | -4.509050e+03 | -1.653362e+03 |
| 67 | -6.720082e+03 | 5.120588e+03  | 8.819556e+03  |

trajectory 31

| atom | VX            | VY            | VZ            |
|------|---------------|---------------|---------------|
| 1    | -3.515802e+01 | 5.952753e+02  | -4.451445e+01 |
| 2    | 1.059480e+02  | 1.398334e+02  | -4.382029e+02 |
| 3    | 9.834168e+02  | -1.273171e+03 | -3.879815e+02 |
| 4    | 6.697537e+02  | -3.075113e+02 | -8.626441e+02 |
| 5    | 3.037132e+02  | -1.011269e+03 | 8.216988e-01  |

|    |               |               |               |
|----|---------------|---------------|---------------|
| 6  | -2.018277e+03 | -8.772625e+02 | 7.419040e+02  |
| 7  | -8.930932e+03 | 8.837042e+03  | -2.529679e+03 |
| 8  | -5.190092e+03 | 3.823693e+03  | -5.491667e+03 |
| 9  | -1.366674e+03 | 1.182765e+02  | 1.493403e+03  |
| 10 | 3.960317e+02  | -1.489222e+03 | 8.714970e+02  |
| 11 | -9.770681e+02 | 6.370856e+01  | -1.399292e+02 |
| 12 | -8.280041e+02 | 1.692245e+03  | -3.759643e+03 |
| 13 | -1.693021e+03 | 9.770546e+03  | 2.987498e+03  |
| 14 | -1.116548e+03 | 9.292726e+02  | 2.346330e+02  |
| 15 | 2.663253e+03  | 3.902279e+01  | 4.811276e+02  |
| 16 | -3.152512e+02 | -1.611324e+02 | 7.985186e+02  |
| 17 | 1.615404e+01  | -4.993644e+02 | -4.342221e+02 |
| 18 | 1.013944e+02  | -1.206008e+03 | 1.376922e+03  |
| 19 | -1.612686e+03 | 1.257544e+03  | -1.105950e+03 |
| 20 | 2.911218e+02  | -3.858204e+02 | -1.732296e+00 |
| 21 | 3.825872e+02  | -2.491374e+02 | 2.238292e+02  |
| 22 | 6.303014e+02  | 1.364746e+02  | -8.008569e+01 |
| 23 | -6.757336e+02 | -5.321907e+02 | 4.484560e+01  |
| 24 | -1.337277e+03 | 1.147758e+03  | 8.316444e+02  |
| 25 | -6.014683e+02 | 5.086705e+02  | -2.110201e+02 |
| 26 | 7.434200e+02  | 3.176806e+02  | -5.796173e+02 |
| 27 | -6.706924e+02 | -8.480929e+02 | 1.464265e+03  |
| 28 | 1.495256e+03  | -2.275326e+02 | -2.747491e+02 |
| 29 | -2.461550e+02 | 2.522674e+03  | -2.341243e+02 |
| 30 | 7.902961e+02  | -2.558339e+02 | -1.202349e+02 |
| 31 | 2.633009e+02  | 1.102619e+03  | 4.675861e+02  |
| 32 | 6.102910e+01  | -1.516973e+03 | 3.115808e+02  |
| 33 | 3.957986e+03  | 7.144524e+03  | -4.590066e+03 |
| 34 | -2.247840e+03 | -2.921108e+03 | -7.439976e+02 |
| 35 | -3.144815e+03 | 2.965960e+03  | 1.949651e+02  |
| 36 | -5.558487e+03 | -1.910115e+03 | -4.280625e+03 |
| 37 | 1.889039e+03  | -9.253567e+03 | -3.777877e+03 |
| 38 | -2.166289e+03 | 2.744586e+03  | -1.284689e+03 |
| 39 | 4.202036e+03  | -7.538658e+03 | 5.965148e+02  |
| 40 | 3.677894e+03  | -4.726533e+03 | -3.468780e+02 |
| 41 | 7.826561e+02  | -8.297537e+02 | 1.843053e+03  |
| 42 | -4.785134e+02 | 1.013238e+03  | -1.559884e+03 |
| 43 | 4.278513e+02  | 5.610963e+02  | -9.470906e+02 |
| 44 | -6.629962e+02 | 6.728076e+02  | 1.030647e+03  |
| 45 | 1.485036e+02  | 2.113113e+02  | -7.016873e+02 |
| 46 | 1.716583e+03  | -1.512260e+03 | 3.238853e+02  |
| 47 | -4.129911e+03 | -4.856894e+03 | 8.265319e+03  |
| 48 | 9.779952e+02  | 2.770270e+03  | 4.717691e+03  |
| 49 | 5.792694e+03  | -5.586711e+03 | -3.405751e+03 |
| 50 | -4.431554e+03 | -2.603480e+03 | 1.773146e+03  |
| 51 | -4.205316e+03 | 1.938029e+03  | 2.102004e+03  |

|    |               |               |               |
|----|---------------|---------------|---------------|
| 52 | 1.129106e+03  | 5.339626e+02  | 1.003163e+03  |
| 53 | 5.498297e+02  | -6.789198e+02 | -2.952682e+02 |
| 54 | -1.159158e+02 | -2.051904e+02 | -2.958825e+02 |
| 55 | -6.083767e+02 | -1.380201e+03 | -1.734768e+02 |
| 56 | -2.253060e+02 | -8.950421e+02 | -4.260653e+03 |
| 57 | 1.472389e+03  | -4.107965e+03 | -5.936697e+03 |
| 58 | -6.778453e+02 | -3.347733e+03 | 7.225139e+03  |
| 59 | 1.658374e+03  | -2.930623e+03 | -2.223358e+03 |
| 60 | -6.735933e+03 | 1.071205e+04  | 2.861458e+02  |
| 61 | 3.560284e+03  | 8.789571e+02  | 1.104111e+03  |
| 62 | -8.983937e+03 | 9.881632e+02  | -4.367298e+01 |
| 63 | 2.185496e+03  | 1.212770e+04  | 1.279630e+03  |
| 64 | -2.035226e+03 | 3.019936e+03  | 4.699307e+03  |
| 65 | -3.646747e+03 | 7.743429e+03  | -3.133100e+03 |
| 66 | 4.518179e+03  | -2.117427e+03 | -3.439419e+03 |
| 67 | -5.559483e+02 | 1.327482e+03  | -4.253443e+03 |

trajectory 32

| atom | VX            | VY            | VZ            |
|------|---------------|---------------|---------------|
| 1    | 1.223251e+01  | -9.310648e+01 | 3.438197e+01  |
| 2    | -6.831177e+02 | 9.929146e+02  | 2.207727e+03  |
| 3    | 1.731965e+03  | -4.008081e+01 | -1.321705e+03 |
| 4    | -2.294737e+02 | 1.623733e+03  | -6.015829e+02 |
| 5    | 1.936930e+02  | 2.055638e+02  | 8.370269e+02  |
| 6    | -4.596997e+03 | 3.837739e+02  | 6.314754e+03  |
| 7    | 6.938884e+03  | -1.986218e+03 | -7.517308e+03 |
| 8    | -3.329385e+03 | 1.956977e+02  | -6.434460e+01 |
| 9    | 7.698410e+02  | -6.154378e+02 | 4.651308e+02  |
| 10   | 2.817348e+03  | -7.684502e+02 | -2.762826e+02 |
| 11   | -1.067725e+03 | -1.225258e+03 | 9.274661e+02  |
| 12   | -1.431469e+03 | 3.363862e+03  | 3.267262e+03  |
| 13   | -3.305688e+03 | 5.827074e+03  | -6.843284e+03 |
| 14   | -3.018885e+02 | 4.095771e+02  | -2.302343e+02 |
| 15   | -1.782235e+03 | 3.531285e+02  | 9.984650e+02  |
| 16   | 1.048840e+03  | 7.102083e+02  | -8.550771e+01 |
| 17   | -3.149038e+02 | -4.108732e+01 | -4.037082e+02 |
| 18   | 1.820186e+02  | -8.705846e+02 | 9.790034e+02  |
| 19   | 5.338460e+01  | -3.283880e+02 | -5.818375e+02 |
| 20   | -4.836001e+02 | 2.858176e+02  | 8.512535e+02  |
| 21   | 1.086921e+03  | 3.024219e+02  | -4.587637e+01 |
| 22   | -1.727610e+03 | -5.020975e+02 | 7.940253e+02  |
| 23   | -3.882025e+02 | -3.001216e+02 | 9.677811e+02  |
| 24   | -6.726725e+01 | 3.256485e+02  | 8.980532e+02  |
| 25   | 5.274204e+02  | -2.007396e+02 | -1.828258e+03 |

|    |               |               |               |
|----|---------------|---------------|---------------|
| 26 | 5.953733e+02  | 5.685481e+02  | -5.306461e+02 |
| 27 | 1.149345e+03  | -4.357812e+02 | -6.189195e+02 |
| 28 | 1.469931e+03  | -1.055437e+03 | -4.358538e+02 |
| 29 | 7.336962e+01  | 1.419710e+03  | -1.552673e+03 |
| 30 | -2.387861e+02 | -7.355125e+02 | 4.374170e+02  |
| 31 | -1.207184e+03 | 1.094980e+03  | -4.203764e+02 |
| 32 | -1.293654e+02 | -7.927013e+02 | 1.486599e+03  |
| 33 | 1.644594e+03  | 5.710435e+03  | -4.387647e+03 |
| 34 | -3.751488e+03 | -3.401444e+03 | -1.880103e+03 |
| 35 | 1.904030e+03  | -3.140014e+03 | -1.929076e+03 |
| 36 | 5.075174e+03  | 4.421067e+03  | 4.654882e+03  |
| 37 | -9.218086e+03 | 4.782427e+03  | -4.015060e+03 |
| 38 | -3.712292e+03 | 9.534501e+02  | 2.801534e+03  |
| 39 | -3.110884e+03 | -2.079810e+03 | -7.442579e+02 |
| 40 | -8.317369e+02 | 6.538478e+03  | 6.627269e+03  |
| 41 | -1.917903e+03 | 1.149215e+03  | -3.626936e+02 |
| 42 | -3.991381e+02 | 6.994215e+02  | -9.582045e+02 |
| 43 | 3.071500e+02  | 3.241977e+02  | 4.514363e+02  |
| 44 | -7.162428e+01 | -1.274602e+03 | -2.230451e+02 |
| 45 | -3.193782e+02 | -1.362382e+03 | -5.219199e+01 |
| 46 | 9.234833e+01  | -3.741366e+02 | -1.517955e+03 |
| 47 | 2.299567e+03  | -4.593608e+03 | 7.857187e+03  |
| 48 | 9.214243e+02  | 2.046870e+03  | 1.598736e+03  |
| 49 | 2.528415e+03  | 1.201651e+03  | 3.388330e+02  |
| 50 | -4.342073e+03 | 1.140913e+04  | 2.701899e+03  |
| 51 | 4.890806e+03  | -1.413832e+03 | -2.284428e+03 |
| 52 | 5.494672e+02  | 1.278346e+03  | 1.730787e+03  |
| 53 | -9.761168e+02 | 1.391060e+03  | -6.271185e+02 |
| 54 | 6.448628e+02  | -4.182879e+02 | 2.532461e+02  |
| 55 | 6.827193e+02  | -2.623191e+03 | -6.490711e+02 |
| 56 | -2.417224e+03 | -3.250789e+03 | 9.144863e+02  |
| 57 | -1.150163e+03 | -9.920198e+03 | 2.254145e+02  |
| 58 | -1.710953e+03 | -4.776311e+03 | 4.483629e+03  |
| 59 | 1.252334e+03  | -9.636790e+02 | 2.973570e+03  |
| 60 | 3.109514e+03  | -7.477869e+03 | -5.648703e+03 |
| 61 | -2.341696e+03 | -3.394829e+03 | -7.308010e+03 |
| 62 | 2.318383e+03  | -2.553500e+03 | 7.937865e+03  |
| 63 | 1.784501e+03  | 8.590262e+03  | 2.658071e+02  |
| 64 | 5.813770e+03  | -9.150297e+02 | -3.749876e+03 |
| 65 | -4.095696e+03 | 5.962205e+03  | -2.330896e+03 |
| 66 | 1.861057e+03  | -2.910333e+03 | 3.147231e+03  |
| 67 | 5.497580e+03  | 4.832788e+03  | 3.462886e+03  |

trajectory 33

| atom | VX            | VY            | VZ            |
|------|---------------|---------------|---------------|
| 1    | 9.876899e+01  | -2.569727e+02 | 2.451187e+02  |
| 2    | -7.728373e+02 | 1.174206e+03  | -9.438392e+02 |
| 3    | 7.461483e+02  | 6.642735e+02  | 1.295275e+03  |
| 4    | 8.258983e+02  | -7.853451e+02 | -1.031965e+03 |
| 5    | 1.144009e+03  | 2.302657e+02  | 2.829781e+02  |
| 6    | -5.653118e+02 | 4.137503e+03  | -1.444900e+03 |
| 7    | -5.147033e+03 | -4.264127e+03 | -1.647071e+03 |
| 8    | -1.101671e+04 | 3.168212e+03  | -4.001245e+03 |
| 9    | 1.031967e+02  | -5.212449e+02 | -3.917781e+01 |
| 10   | 1.590991e+03  | 5.416922e+02  | 1.131620e+03  |
| 11   | -5.922745e+02 | -4.984289e+02 | -9.891825e+00 |
| 12   | -1.002866e+03 | 6.123385e+03  | -4.010941e+03 |
| 13   | 4.951843e+03  | -7.978219e+03 | -3.828032e+03 |
| 14   | 1.044984e+03  | -5.545574e+02 | -1.157758e+03 |
| 15   | -3.043191e+02 | 1.809951e+03  | 1.019650e+03  |
| 16   | -1.404208e+03 | -9.800466e+02 | -3.903638e+02 |
| 17   | -2.364392e+02 | 8.655975e+01  | -1.115930e+02 |
| 18   | -1.185257e+03 | -2.114360e+02 | -9.150612e+01 |
| 19   | 1.358361e+03  | 1.355781e+03  | 1.250720e+02  |
| 20   | 1.017009e+03  | -8.715842e+02 | -3.347905e+02 |
| 21   | -1.164238e+03 | -4.821781e+02 | 1.592431e+03  |
| 22   | -6.778689e+02 | -4.808800e+01 | 2.636911e+02  |
| 23   | 9.855638e+02  | 5.944394e+02  | -1.437377e+01 |
| 24   | 7.229499e+01  | 2.156511e+02  | -7.012204e+02 |
| 25   | -4.576532e+02 | -5.974216e+02 | 1.782050e+02  |
| 26   | -3.772893e+02 | -2.533873e+02 | -4.628275e+02 |
| 27   | 1.826713e+03  | 1.047581e+03  | -3.013392e+02 |
| 28   | 1.742927e+03  | -1.832269e+03 | 8.413817e+01  |
| 29   | -1.841998e+03 | 9.163627e+02  | 2.828024e+02  |
| 30   | -1.223595e+03 | 4.420327e+01  | -9.600438e+02 |
| 31   | -3.421685e+01 | 4.390311e+02  | 5.043081e+02  |
| 32   | -1.275984e+03 | -8.737709e+02 | -8.579521e+01 |
| 33   | -6.101232e+03 | 5.495155e+03  | 4.677477e+03  |
| 34   | 8.253879e+03  | 2.801434e+03  | -9.481927e+01 |
| 35   | -3.073299e+03 | -6.502343e+03 | -1.797412e+03 |
| 36   | 4.208498e+03  | 1.265535e+01  | 4.902323e+03  |
| 37   | 2.028261e+03  | -6.083368e+03 | 4.024294e+03  |
| 38   | 3.543961e+03  | -3.048299e+03 | 3.232896e+03  |
| 39   | 4.848574e+02  | 5.858058e+02  | -3.586487e+03 |
| 40   | -4.423842e+03 | 1.733816e+03  | 2.803123e+03  |
| 41   | 3.731606e+01  | -1.542237e+03 | 1.047961e+03  |
| 42   | 2.826734e+02  | -1.775680e+02 | -2.712076e+02 |
| 43   | 1.118499e+03  | 5.018531e+02  | 2.838723e+02  |
| 44   | 5.054850e+02  | 1.464933e+03  | 1.094784e+03  |
| 45   | -1.350446e+03 | 6.884021e+02  | -5.759827e+02 |

|    |               |               |               |
|----|---------------|---------------|---------------|
| 46 | -1.442502e+03 | 7.291737e+01  | 2.179157e+02  |
| 47 | -2.860560e+02 | -5.789549e+03 | -2.404339e+03 |
| 48 | 6.038117e+03  | 4.573495e+03  | -9.209091e+03 |
| 49 | 6.807468e+01  | -3.562863e+03 | 9.706304e+02  |
| 50 | 1.712284e+03  | 3.694790e+03  | -2.701778e+03 |
| 51 | -4.757754e+02 | -5.939984e+03 | 1.647239e+03  |
| 52 | 2.884426e+02  | 4.343288e+02  | -8.180077e+00 |
| 53 | 1.825530e+02  | 2.730510e+02  | -1.217519e+03 |
| 54 | -8.323252e+02 | -3.791419e+02 | -4.303918e+01 |
| 55 | 2.059046e+03  | 4.006661e+01  | 2.082103e+02  |
| 56 | -4.778634e+03 | 3.313991e+03  | 1.970808e+02  |
| 57 | 1.768267e+03  | -7.134431e+02 | 8.811656e+02  |
| 58 | 4.421389e+03  | 9.967077e+03  | -6.218163e+03 |
| 59 | 3.287740e+03  | -9.276849e+02 | 5.418114e+03  |
| 60 | 1.194237e+03  | 6.306148e+03  | 2.208755e+03  |
| 61 | -7.216426e+03 | -1.994967e+03 | -2.319788e+03 |
| 62 | -7.614209e+02 | -3.756026e+03 | 6.975880e+03  |
| 63 | 3.893682e+03  | 5.910516e+03  | -6.208078e+03 |
| 64 | 5.895408e+03  | 3.893509e+03  | -2.197170e+03 |
| 65 | -1.066106e+04 | 2.720181e+03  | -1.071336e+03 |
| 66 | -6.485558e+02 | -2.073238e+03 | -2.882196e+03 |
| 67 | -4.993642e+03 | -1.753992e+03 | 2.911386e+03  |

trajectory 34

| atom | VX            | VY            | VZ            |
|------|---------------|---------------|---------------|
| 1    | -1.223658e+02 | -8.185150e+01 | -1.303921e+02 |
| 2    | -6.892838e+02 | 1.210538e+01  | 6.952549e+02  |
| 3    | 2.824808e+02  | 3.440220e+02  | -1.424934e+03 |
| 4    | 1.850787e+01  | -1.096766e+03 | 7.352071e+02  |
| 5    | 1.171624e+03  | 4.954250e+02  | -4.150240e+02 |
| 6    | -2.721188e+03 | 4.101101e+03  | 1.829732e+03  |
| 7    | -1.586243e+03 | 9.338582e+03  | 1.305488e+03  |
| 8    | -4.830947e+03 | -3.646130e+03 | -2.349243e+03 |
| 9    | 9.535892e+02  | -1.674482e+02 | 8.343609e+02  |
| 10   | -2.571867e+02 | 1.586888e+03  | -1.167975e+02 |
| 11   | -7.194687e+02 | -1.251098e+03 | 5.625609e+02  |
| 12   | -1.074709e+03 | 4.627841e+03  | -6.627983e+03 |
| 13   | -8.682473e+03 | -4.298380e+02 | 9.618680e+02  |
| 14   | 8.852956e+02  | -2.473596e+02 | -1.413509e+02 |
| 15   | -4.740552e+01 | 1.113700e+03  | 1.335443e+03  |
| 16   | -3.289242e+02 | -3.249811e+02 | -9.005869e+02 |
| 17   | 1.813895e+02  | 4.822132e+01  | 9.930397e+01  |
| 18   | -3.267516e+00 | -5.704739e+01 | -9.169121e+02 |
| 19   | -1.599406e+02 | -3.076808e+02 | 2.188973e+02  |

|    |               |               |               |
|----|---------------|---------------|---------------|
| 20 | -6.670723e+02 | 1.953035e+02  | 8.135330e+02  |
| 21 | -9.181810e+02 | 3.067745e+02  | 2.121763e+01  |
| 22 | -6.143410e+02 | -1.590507e+03 | 3.062320e+02  |
| 23 | 1.328863e+03  | 1.210065e+02  | 7.110267e+02  |
| 24 | -2.844741e+02 | 2.885062e+02  | -2.347270e+01 |
| 25 | -1.690885e+03 | -7.651330e+02 | -8.813695e+02 |
| 26 | 1.425750e+03  | -3.728547e+02 | 2.939526e+02  |
| 27 | -1.003976e+02 | -9.027419e+02 | -1.273958e+03 |
| 28 | 8.590316e+02  | -6.402073e+02 | 1.926170e+03  |
| 29 | -2.837372e+02 | 6.757850e+02  | -8.734722e+02 |
| 30 | -6.961306e+02 | 1.420570e+03  | -3.463963e+02 |
| 31 | 8.159149e+01  | 5.755163e+02  | 1.178217e+03  |
| 32 | 8.941964e+02  | 8.068790e+02  | -4.031174e+02 |
| 33 | 5.363176e+03  | -2.882354e+03 | 1.086886e+02  |
| 34 | -6.979097e+03 | -3.039457e+03 | 2.027923e+03  |
| 35 | -1.291044e+02 | 6.314020e+03  | 1.332527e+03  |
| 36 | -5.650568e+03 | -7.801619e+03 | -4.283816e+03 |
| 37 | -8.999115e+02 | -4.206634e+03 | 6.889461e+03  |
| 38 | -6.258313e+03 | -2.964433e+03 | -1.524474e+03 |
| 39 | 5.409320e+03  | 3.483446e+03  | -7.741373e+03 |
| 40 | -5.203388e+03 | 2.626300e+03  | -2.336900e+03 |
| 41 | 2.081054e+03  | -6.649899e+01 | 5.425799e+02  |
| 42 | 9.960264e+02  | -1.566503e+02 | 4.030891e+02  |
| 43 | -7.106119e+02 | -2.312287e+02 | 2.576980e+01  |
| 44 | -8.474068e+02 | -1.288609e+03 | 1.536191e+03  |
| 45 | -6.287670e+01 | -5.202631e+02 | -2.108934e+01 |
| 46 | -1.344445e+03 | 1.381080e+03  | -1.992400e+03 |
| 47 | 2.500801e+03  | 2.978907e+02  | -2.085428e+03 |
| 48 | -3.839234e+03 | -5.186545e+03 | 4.994820e+01  |
| 49 | 5.056768e+03  | 6.786748e+00  | -3.044843e+03 |
| 50 | -7.055829e+03 | 1.244871e+04  | -8.921970e+02 |
| 51 | 1.406455e+03  | 4.569406e+03  | -2.454378e+03 |
| 52 | 1.369964e+03  | -1.363510e+03 | 3.856615e+02  |
| 53 | -2.122277e+03 | 1.164913e+03  | -3.271524e+02 |
| 54 | 2.505912e+02  | -2.621466e+02 | 3.194468e+02  |
| 55 | 1.315145e+03  | -3.921194e+02 | -1.697005e+02 |
| 56 | 6.931307e+03  | 6.330310e+03  | 6.207758e+03  |
| 57 | 7.187376e+01  | -1.872529e+03 | 1.503313e+03  |
| 58 | -1.679314e+03 | 1.192786e+03  | 1.379936e+03  |
| 59 | 4.558960e+03  | 5.250236e+03  | -8.480955e+03 |
| 60 | 2.603101e+03  | -4.663656e+01 | 3.978804e+03  |
| 61 | 2.855549e+01  | -1.706553e+03 | 1.383362e+03  |
| 62 | -6.146512e+01 | 7.007717e+03  | -4.065071e+03 |
| 63 | 6.896718e+02  | -7.132444e+03 | -4.869851e+03 |
| 64 | -3.196678e+03 | -4.374197e+02 | -5.129650e+03 |
| 65 | -2.410264e+03 | 6.600720e+03  | -3.121033e+01 |

|    |               |               |               |
|----|---------------|---------------|---------------|
| 66 | -3.349942e+02 | 3.185241e+03  | -7.214279e+03 |
| 67 | -3.889297e+03 | -9.165076e+03 | 5.179117e+02  |

trajectory 35

| atom | VX            | VY            | VZ            |
|------|---------------|---------------|---------------|
| 1    | -1.412703e+02 | 8.622897e+01  | -1.698530e+02 |
| 2    | 1.187099e+03  | -2.838317e+02 | -3.174122e+02 |
| 3    | -1.317767e+03 | 1.072092e+02  | 7.257398e+02  |
| 4    | 8.754136e+02  | -8.505006e+02 | -5.957788e+02 |
| 5    | 1.868176e+02  | -3.262678e+02 | 1.009657e+03  |
| 6    | 3.124809e+03  | 6.239044e+03  | -1.756605e+03 |
| 7    | -1.377829e+03 | 9.064295e+03  | 2.681874e+03  |
| 8    | 1.365624e+03  | -3.185583e+03 | 4.711735e+03  |
| 9    | 2.764712e+02  | 2.818489e+02  | -4.647279e+02 |
| 10   | 1.460870e+02  | 9.996758e+02  | -7.607382e+02 |
| 11   | 2.320930e+03  | -1.220503e+03 | 5.984089e+02  |
| 12   | -1.570676e+02 | 2.644377e+03  | 2.229611e+01  |
| 13   | 5.955378e+03  | 7.220523e+03  | -2.946359e+03 |
| 14   | -1.074243e+03 | 7.997077e+02  | 2.580954e+02  |
| 15   | 1.290976e+03  | 1.574562e+00  | -1.183607e+03 |
| 16   | 1.244165e+01  | -4.749388e+02 | -4.812567e+01 |
| 17   | -2.416618e+02 | 6.288431e+01  | -1.802798e+02 |
| 18   | -7.675334e+02 | 6.580558e+02  | 2.784260e+02  |
| 19   | 1.968506e+03  | -3.224566e+02 | 1.475752e+03  |
| 20   | -7.275707e+02 | -6.577016e+01 | -8.815188e+02 |
| 21   | -7.296140e+02 | -1.175383e+03 | -2.453499e+02 |
| 22   | -8.495465e+02 | 6.207400e+02  | 1.532024e+03  |
| 23   | 4.991681e+02  | 4.516352e+02  | 1.828153e+01  |
| 24   | 1.502468e+02  | -7.127446e+02 | -6.521339e+02 |
| 25   | -4.423320e+01 | -1.847435e+03 | -2.384633e+02 |
| 26   | -2.118277e+02 | 4.557103e+02  | 6.803914e+02  |
| 27   | 1.377439e+02  | -5.783413e+02 | 4.883746e+02  |
| 28   | 2.121281e+01  | -1.251490e+03 | 3.784654e+02  |
| 29   | -5.314889e+01 | 1.579889e+03  | -1.145935e+03 |
| 30   | -2.252910e+03 | 1.061347e+02  | -1.087463e+03 |
| 31   | 1.051100e+03  | 5.539150e+01  | 5.468389e+02  |
| 32   | 2.154986e+03  | -2.151905e+01 | 4.778328e+02  |
| 33   | 1.549209e+03  | 6.678174e+03  | 2.067470e+03  |
| 34   | 6.577271e+03  | 1.299484e+03  | -8.746431e+03 |
| 35   | 4.968277e+03  | -1.067580e+03 | -1.685999e+03 |
| 36   | 7.002818e+03  | 7.289076e+03  | -9.928309e+01 |
| 37   | 4.587056e+03  | -3.147550e+03 | 2.680822e+03  |
| 38   | -4.989723e+03 | 2.716483e+03  | 1.322655e+03  |
| 39   | -1.864856e+03 | 1.646130e+03  | -5.776366e+03 |



|    |               |               |               |
|----|---------------|---------------|---------------|
| 40 | -6.987297e+03 | 1.881609e+03  | 2.729237e+03  |
| 41 | -1.814856e+03 | -7.500631e+01 | 1.901626e+03  |
| 42 | 6.653534e+02  | -3.478836e+02 | -3.151055e+02 |
| 43 | 1.583576e+03  | 8.893967e+01  | 4.171396e+02  |
| 44 | 8.570949e+01  | 1.922259e+02  | 1.605672e+03  |
| 45 | -1.384996e+03 | -2.087735e+02 | -9.089133e+02 |
| 46 | 4.783741e+02  | -5.314011e+02 | 5.131526e+02  |
| 47 | -2.355092e+03 | 8.593381e+03  | 3.505631e+02  |
| 48 | 7.135076e+03  | -4.561560e+02 | -3.440005e+03 |
| 49 | 3.256472e+03  | -4.154883e+03 | -5.874580e+03 |
| 50 | -4.383703e+03 | 5.660114e+03  | -3.752528e+03 |
| 51 | -9.290021e+03 | 2.360878e+03  | -7.346616e+02 |
| 52 | 2.005402e+03  | -9.412676e+02 | -1.019661e+03 |
| 53 | -8.075309e+02 | -2.810015e+01 | -9.617277e+02 |
| 54 | -1.702621e+03 | 1.248370e+03  | 7.308969e+02  |
| 55 | 1.316713e+01  | 4.489484e+02  | -1.531707e+02 |
| 56 | 4.661337e+03  | -2.238869e+02 | 1.560307e+03  |
| 57 | 8.193103e+02  | -1.628547e+03 | 2.104927e+03  |
| 58 | -6.621163e+03 | -1.839012e+03 | 5.631938e+03  |
| 59 | 4.504667e+02  | -7.080817e+03 | -3.351887e+03 |
| 60 | 3.977908e+02  | 8.235537e+03  | 4.793354e+03  |
| 61 | 2.829121e+03  | 3.355777e+03  | -3.241927e+03 |
| 62 | 9.236905e+02  | -1.791365e+03 | 4.648176e+02  |
| 63 | -2.643404e+03 | -9.334828e+03 | 1.718814e+02  |
| 64 | 1.272928e+03  | -5.214825e+03 | 3.290523e+03  |
| 65 | -3.030765e+03 | -9.466285e+03 | 7.689620e+03  |
| 66 | -5.228018e+03 | -3.032065e+03 | 4.224899e+03  |
| 67 | -2.250931e+03 | 1.740441e+03  | 5.558801e+03  |

trajectory 36

| atom | VX            | VY            | VZ            |
|------|---------------|---------------|---------------|
| 1    | -2.510407e+02 | 1.962483e+02  | 6.924945e+01  |
| 2    | -2.949334e+02 | -1.167106e+03 | -4.222095e+01 |
| 3    | 2.119608e+02  | -3.776531e+02 | -8.845517e+02 |
| 4    | 4.897082e+02  | -1.077651e+01 | 5.504105e+02  |
| 5    | 1.501554e+03  | -6.042325e+02 | -1.390483e+03 |
| 6    | -5.077268e+03 | -4.174180e+02 | -3.742417e+02 |
| 7    | -3.865412e+03 | -6.329985e+03 | -1.082746e+04 |
| 8    | -2.276804e+03 | -8.612599e+02 | -2.014774e+02 |
| 9    | 3.719754e+01  | 1.566689e+02  | 8.675108e+02  |
| 10   | -6.043271e+02 | 2.168314e+03  | 1.194099e+02  |
| 11   | -6.118605e+02 | 4.258594e+02  | -1.552940e+03 |
| 12   | -4.469885e+02 | 9.755020e+03  | -2.021770e+03 |
| 13   | -1.379863e+03 | -4.824551e+02 | 3.643521e+03  |

|    |               |               |               |
|----|---------------|---------------|---------------|
| 14 | 1.329198e+02  | 2.951736e+02  | -1.563655e+01 |
| 15 | -2.593209e+02 | -8.224896e+02 | 3.232420e+01  |
| 16 | -1.020399e+03 | -4.759852e+02 | 1.060990e+02  |
| 17 | -1.366235e+02 | -1.621330e+02 | 1.112577e+02  |
| 18 | 8.454204e+01  | 1.469688e+03  | -2.310710e+02 |
| 19 | -2.234592e+02 | 5.391145e+02  | 8.757242e+02  |
| 20 | 8.819703e+02  | -1.386232e+03 | -1.758728e+03 |
| 21 | -1.157503e+03 | 9.120503e+01  | 2.796093e+02  |
| 22 | 2.935271e+03  | -1.481489e+03 | 7.429209e+02  |
| 23 | -4.898157e+02 | 2.281169e+02  | -1.206917e+02 |
| 24 | -6.640561e+01 | -5.904864e+02 | 3.097351e+02  |
| 25 | 1.069078e+03  | 2.679334e+02  | -8.191068e+02 |
| 26 | -2.162171e+02 | -1.020445e+03 | -5.182805e+02 |
| 27 | -3.845270e+02 | 2.019178e+03  | 2.842828e+02  |
| 28 | 8.123224e+02  | -3.116351e+02 | 1.796342e+02  |
| 29 | -1.369923e+03 | -1.690777e+02 | -1.478631e+03 |
| 30 | 1.435814e+02  | -5.357663e+02 | -9.525661e+01 |
| 31 | 6.196529e+01  | 1.025459e+03  | 8.748138e+02  |
| 32 | 3.103254e+02  | 9.719312e+01  | 1.116669e+03  |
| 33 | -6.824561e+02 | -5.354239e+03 | -1.641502e+03 |
| 34 | -7.923883e+03 | -1.958430e+03 | 2.330735e+03  |
| 35 | 1.851235e+03  | -1.754469e+03 | -4.435943e+03 |
| 36 | 2.657017e+03  | 6.289219e+03  | 6.485303e+03  |
| 37 | -2.937099e+03 | -3.851182e+03 | 8.249069e+03  |
| 38 | -1.390232e+03 | -7.350518e+03 | -4.448855e+02 |
| 39 | -4.325574e+03 | -1.975436e+03 | 1.709517e+03  |
| 40 | 4.265193e+03  | -3.921092e+03 | -2.222553e+03 |
| 41 | -1.052184e+03 | -1.266594e+03 | 1.784423e+03  |
| 42 | 2.442049e+03  | -4.729896e+02 | -1.290765e+03 |
| 43 | 1.018896e+03  | 4.766512e+02  | -1.096910e+03 |
| 44 | -3.730623e+02 | 4.773338e+02  | -5.825235e+02 |
| 45 | 2.169113e+01  | -6.797705e+02 | 1.478870e+03  |
| 46 | -2.144658e+03 | 5.951201e+02  | -9.554965e+02 |
| 47 | 7.192280e+03  | 1.045284e+04  | 3.567094e+03  |
| 48 | 8.893089e+03  | -4.888125e+03 | 5.283433e+00  |
| 49 | 2.343455e+03  | -4.422323e+03 | 3.028070e+03  |
| 50 | -4.059470e+03 | 5.890024e+03  | 1.583750e+03  |
| 51 | -1.665951e+03 | -4.002264e+03 | 3.501090e+03  |
| 52 | -6.136830e+02 | 1.860928e+02  | -1.840484e+02 |
| 53 | 4.742524e+01  | -3.439800e+01 | 8.047369e+02  |
| 54 | -6.194755e+02 | 9.335401e+02  | -4.638745e+02 |
| 55 | 8.639604e+01  | 1.150030e+03  | 5.584146e+02  |
| 56 | 3.031007e+03  | 2.379816e+03  | -7.855150e+02 |
| 57 | 2.067092e+03  | -8.361239e+03 | -3.418586e+03 |
| 58 | 6.015610e+03  | 1.605516e+03  | 2.161377e+03  |
| 59 | -5.899369e+02 | 7.395658e+02  | -2.399662e+03 |

|    |              |               |               |
|----|--------------|---------------|---------------|
| 60 | 6.547091e+03 | 1.017355e+04  | 3.370497e+03  |
| 61 | 3.213605e+03 | 2.578566e+03  | -4.943126e+01 |
| 62 | 2.715685e+03 | -1.475873e+03 | 6.919263e+03  |
| 63 | 5.362274e+03 | 5.645828e+03  | 2.820063e+03  |
| 64 | 3.231576e+03 | -4.003335e+03 | 2.675280e+03  |
| 65 | 4.943256e+03 | -4.451320e+03 | 3.070530e+03  |
| 66 | 5.333975e+03 | 1.843349e+03  | -1.984047e+03 |
| 67 | 2.474181e+03 | -4.299580e+03 | -1.068981e+04 |

trajectory 37

| atom | VX            | VY            | VZ            |
|------|---------------|---------------|---------------|
| 1    | 4.938683e+01  | -4.123705e+02 | -3.006610e+01 |
| 2    | -1.493541e+02 | 7.655874e+02  | -4.638143e+02 |
| 3    | -2.352322e+02 | 1.740701e+03  | 7.475045e+01  |
| 4    | 1.021017e+02  | -1.511332e+03 | 1.618282e+03  |
| 5    | 1.879986e+02  | 1.382708e+03  | -3.618166e+01 |
| 6    | -9.553913e+03 | -3.069121e+02 | -1.795806e+03 |
| 7    | 7.349712e+03  | -4.297507e+03 | -4.094384e+03 |
| 8    | -3.568050e+03 | -5.125762e+02 | 2.080803e+02  |
| 9    | 3.422093e+02  | 3.502988e+02  | -1.610156e+03 |
| 10   | 1.912256e+01  | 9.433530e+01  | -2.921291e+02 |
| 11   | -5.375754e+01 | 1.673280e+02  | -4.887996e+02 |
| 12   | 7.227135e+03  | 2.448831e+03  | -1.480162e+03 |
| 13   | -3.192945e+03 | 3.786452e+03  | -8.873334e+03 |
| 14   | 1.635437e+03  | -2.380280e+02 | -9.539515e+02 |
| 15   | -1.785982e+03 | -9.550622e+02 | 1.134498e+03  |
| 16   | 6.881749e+02  | 1.730544e+02  | 9.426792e+02  |
| 17   | -9.259817e+01 | 7.632428e+00  | 7.674316e+01  |
| 18   | -5.195898e+02 | -1.036374e+02 | 2.494771e+02  |
| 19   | 9.294677e+02  | -5.434506e+02 | -5.577213e+02 |
| 20   | -1.124146e+03 | 4.001081e+02  | 8.513624e+02  |
| 21   | -6.972989e+02 | -6.789576e+01 | -7.379898e+02 |
| 22   | -8.470888e+02 | -4.099555e+02 | 1.257436e+02  |
| 23   | 1.010451e+03  | -1.296390e+03 | 5.008347e+02  |
| 24   | -3.825610e+01 | 7.263310e+02  | 8.259446e+02  |
| 25   | -5.586924e+02 | 5.578809e+02  | 9.932474e+02  |
| 26   | -3.740534e+02 | 6.990841e+02  | 7.750667e+02  |
| 27   | 1.829518e+03  | -2.879871e+02 | -2.699523e+02 |
| 28   | 3.033268e+02  | 6.178951e+02  | 3.462474e+02  |
| 29   | -1.978534e+03 | -2.824455e+02 | 1.502953e+03  |
| 30   | 3.031059e+02  | 4.487336e+02  | -2.971732e+02 |
| 31   | -2.529233e+03 | -1.337070e+03 | 5.127009e+02  |
| 32   | 4.913872e+02  | -4.152404e+01 | 5.679464e+02  |
| 33   | 2.431611e+03  | 2.529816e+03  | 5.816748e+02  |

|    |               |               |               |
|----|---------------|---------------|---------------|
| 34 | 3.739622e+03  | -1.631556e+03 | -6.363267e+03 |
| 35 | -2.324376e+03 | -2.586421e+03 | -5.617059e+03 |
| 36 | 1.396898e+03  | -8.351314e+02 | 9.274558e+03  |
| 37 | -1.002285e+03 | 2.891689e+03  | -7.126693e+03 |
| 38 | 2.506141e+03  | 3.152142e+03  | -7.126933e+03 |
| 39 | -6.046361e+03 | -6.063788e+02 | 1.268735e+03  |
| 40 | -9.225708e+02 | 5.340401e+03  | -1.897158e+02 |
| 41 | 2.148447e+03  | -8.938551e+02 | -5.216002e+02 |
| 42 | -5.942477e+02 | 1.240522e+03  | -8.641795e+02 |
| 43 | 4.509543e+02  | 7.092181e+02  | -3.764157e+02 |
| 44 | 1.843901e+02  | -5.037650e+02 | -4.702580e+02 |
| 45 | -3.411552e+02 | -1.158443e+03 | 1.720036e+03  |
| 46 | 4.147953e+02  | -6.946736e+02 | 6.811466e+01  |
| 47 | 2.766976e+03  | -2.488609e+03 | 4.105693e+03  |
| 48 | -4.194052e+01 | 7.847442e+03  | -5.854205e+03 |
| 49 | -3.559621e+03 | 5.536777e+03  | 1.449462e+03  |
| 50 | 3.672636e+03  | 6.120261e+03  | -5.248200e+03 |
| 51 | -2.032583e+03 | -2.224050e+03 | -4.444222e+02 |
| 52 | -7.581871e+02 | 4.487572e+02  | 4.111690e+02  |
| 53 | -3.359360e+02 | -8.046298e+02 | 1.185891e+02  |
| 54 | 1.135877e+03  | 5.941387e+02  | -1.278729e+03 |
| 55 | -8.167345e+02 | -3.256336e+01 | -1.500915e+03 |
| 56 | 3.157610e+03  | 1.463467e+03  | 2.713658e+03  |
| 57 | -2.461539e+03 | -5.421001e+03 | -1.034320e+04 |
| 58 | 4.536275e+03  | 5.075859e+03  | -1.115594e+03 |
| 59 | 5.598014e+03  | 2.266196e+03  | 1.841822e+03  |
| 60 | -1.426326e+02 | 1.271673e+04  | -3.229872e+03 |
| 61 | 2.484389e+03  | 2.453420e+03  | -8.595514e+02 |
| 62 | -2.698161e+03 | -4.397313e+03 | 6.063968e+03  |
| 63 | 4.736216e+03  | 4.101284e+03  | -2.694956e+03 |
| 64 | 2.021726e+03  | -7.856323e+03 | 2.063578e+02  |
| 65 | -6.584598e+02 | 3.660369e+03  | 2.586186e+03  |
| 66 | -5.738027e+03 | 6.917860e+02  | -2.018731e+02 |
| 67 | 9.262329e+03  | 6.377421e+03  | -3.323281e+03 |

trajectory 38

| atom | VX            | VY            | VZ            |
|------|---------------|---------------|---------------|
| 1    | -4.071673e+02 | 1.037114e+02  | 1.612952e+02  |
| 2    | 1.391366e+03  | -1.742140e+02 | 1.643585e+03  |
| 3    | -4.869855e+02 | 4.095875e+02  | 1.381766e+03  |
| 4    | 4.034637e+02  | -1.357968e+03 | 8.941889e+01  |
| 5    | 1.035140e+03  | -6.941476e+02 | 1.184731e+03  |
| 6    | -1.885034e+02 | -1.024341e+02 | -3.229303e+03 |
| 7    | 3.895254e+03  | -5.131567e+03 | 2.572252e+03  |

|    |               |               |               |
|----|---------------|---------------|---------------|
| 8  | -6.917764e+03 | 4.635383e+03  | -8.108779e+03 |
| 9  | 6.450417e+02  | 7.206787e+01  | -5.023966e+02 |
| 10 | 1.086014e+03  | 2.156947e+03  | 5.502281e+02  |
| 11 | -4.922305e+02 | 5.425213e+02  | 5.003577e+02  |
| 12 | -6.606538e+03 | -8.797030e+02 | 5.012653e+03  |
| 13 | -3.364593e+03 | -6.651491e+03 | -7.108441e+02 |
| 14 | 1.269076e+03  | -4.670219e+02 | -1.503004e+03 |
| 15 | 1.598324e+02  | -1.573148e+02 | 6.441050e+02  |
| 16 | -2.078844e+02 | 4.956785e+02  | -5.698145e+02 |
| 17 | -1.288508e+02 | -1.397934e+02 | -1.715197e+02 |
| 18 | 1.709164e+02  | 3.499610e+02  | 8.108557e+02  |
| 19 | -1.109749e+03 | 1.427084e+03  | 6.929407e+02  |
| 20 | -1.215632e+02 | -1.105569e+03 | -4.671950e+01 |
| 21 | 1.366947e+03  | 4.077182e+02  | 1.866231e+02  |
| 22 | -2.133373e+03 | -1.315731e+03 | 8.824379e+02  |
| 23 | -7.884274e+02 | 2.940074e+02  | -6.851307e+02 |
| 24 | -1.189203e+03 | -4.236699e+02 | -6.366045e+02 |
| 25 | 3.688220e+02  | 2.098156e+03  | 1.361845e+03  |
| 26 | 5.968671e+02  | -4.043324e+02 | -6.029693e+02 |
| 27 | -2.031672e+02 | -1.099056e+03 | 9.578357e+02  |
| 28 | 6.163058e+02  | 8.662755e+01  | -9.958696e+02 |
| 29 | 1.548844e+03  | -1.868574e+02 | 8.381676e+02  |
| 30 | -2.133063e+02 | 2.704421e+02  | -1.413382e+03 |
| 31 | -5.846165e+01 | 2.939931e+02  | 1.388023e+02  |
| 32 | 7.872134e+02  | 2.695472e+02  | -8.598836e+02 |
| 33 | 6.422718e+03  | 5.413622e+03  | -4.762442e+03 |
| 34 | 8.197518e+03  | -1.501434e+03 | -6.994133e+03 |
| 35 | -9.575858e+03 | 1.130065e+03  | 3.963893e+03  |
| 36 | -1.018983e+03 | 5.571259e+03  | 4.302961e+03  |
| 37 | 2.311650e+03  | 2.651232e+03  | -1.402501e+03 |
| 38 | -4.297131e+03 | -2.612763e+03 | 5.372205e+03  |
| 39 | 4.921966e+02  | -1.760800e+03 | 1.503776e+03  |
| 40 | 3.053529e+03  | -7.396362e+03 | -1.745451e+03 |
| 41 | -7.349181e+02 | -4.055622e+02 | 2.036672e+01  |
| 42 | 1.755739e+03  | -1.208746e+02 | 1.091041e+02  |
| 43 | -7.787681e+02 | 4.233087e+00  | 6.510662e+02  |
| 44 | 4.526819e-01  | 3.715405e+02  | -9.216769e+02 |
| 45 | -1.258054e+02 | 1.827408e+03  | -8.484389e+02 |
| 46 | -1.375800e+03 | -1.772580e+02 | 1.268271e+01  |
| 47 | -1.151616e+03 | -4.134010e+03 | 7.653322e+03  |
| 48 | -8.761434e+03 | -1.428811e+03 | 1.001663e+03  |
| 49 | -5.115526e+03 | 2.519294e+03  | 5.768554e+03  |
| 50 | 1.100883e+03  | -4.062561e+03 | 7.826910e+02  |
| 51 | 3.071113e+03  | 5.091719e+03  | -5.110101e+03 |
| 52 | 1.036038e+03  | -1.042563e+03 | 1.453128e+02  |
| 53 | -9.733937e+02 | 4.070518e+02  | 2.129290e+02  |

|    |               |               |               |
|----|---------------|---------------|---------------|
| 54 | 1.074638e+03  | 2.464931e+02  | -7.758833e+02 |
| 55 | 1.986847e+02  | 7.934995e+02  | -1.814463e+02 |
| 56 | -7.803740e+03 | -8.435927e+03 | -2.955526e+03 |
| 57 | 4.987530e+03  | -3.130096e+03 | 4.047753e+03  |
| 58 | -8.047253e+00 | 1.385713e+03  | 4.554982e+02  |
| 59 | -1.331310e+03 | 3.350797e+03  | -3.986825e+03 |
| 60 | 2.860356e+03  | -3.217743e+03 | -8.496469e+03 |
| 61 | 7.057640e+03  | 4.892145e+02  | -7.336145e+02 |
| 62 | 4.546005e+02  | 1.051214e+02  | 7.040336e+02  |
| 63 | -1.209570e+03 | -9.022686e+03 | -6.074036e+03 |
| 64 | 4.426586e+03  | -4.017131e+03 | 4.643922e+02  |
| 65 | 7.175709e+03  | -6.638915e+03 | 1.239064e+03  |
| 66 | -1.253567e+03 | 5.071956e+03  | -6.703343e+03 |
| 67 | -4.472370e+03 | 9.163913e+02  | 1.502572e+03  |

trajectory 39

| atom | VX            | VY            | VZ            |
|------|---------------|---------------|---------------|
| 1    | 1.490587e+02  | -1.396665e+02 | 1.780655e+02  |
| 2    | 1.210090e+03  | 5.037573e+02  | -6.926867e+01 |
| 3    | -8.204604e+02 | -9.061253e+02 | -1.326130e+03 |
| 4    | -8.878156e+02 | 1.517084e+03  | -1.237887e+02 |
| 5    | 1.277933e+03  | -4.956281e+02 | -1.209536e+03 |
| 6    | -1.724457e+03 | -2.548948e+03 | 1.225132e+04  |
| 7    | 6.496005e+02  | 2.929661e+03  | -3.957136e+02 |
| 8    | 1.828274e+03  | -2.051974e+03 | 3.617347e+02  |
| 9    | -1.087531e+02 | 4.764618e+02  | 5.669617e+02  |
| 10   | -1.687584e+03 | 2.987788e+02  | 4.833202e+02  |
| 11   | 1.068759e+02  | -5.008419e+02 | 6.697507e+01  |
| 12   | -4.395805e+03 | -1.926162e+02 | -6.542975e+03 |
| 13   | 2.375175e+03  | 2.792569e+03  | -8.518646e+03 |
| 14   | 5.562956e+02  | -5.261421e+02 | -9.319129e+01 |
| 15   | -9.671301e+02 | -1.460590e+03 | -2.127137e+03 |
| 16   | 1.810354e+03  | 5.840686e+02  | 1.263580e+03  |
| 17   | 3.004622e+01  | 1.387293e+01  | -5.922504e+02 |
| 18   | -4.740265e+02 | 7.652324e+02  | 1.101106e+02  |
| 19   | -1.451334e+03 | 5.205825e+02  | 1.057213e+03  |
| 20   | 2.312771e+02  | 2.097936e+02  | 4.806239e+02  |
| 21   | -1.076037e+03 | -2.260425e+02 | 8.352914e+02  |
| 22   | 1.014837e+03  | -1.045544e+02 | 8.623018e+02  |
| 23   | -1.222768e+02 | 3.111958e+02  | -6.203034e+01 |
| 24   | -1.235864e+03 | 2.184424e+02  | 4.444494e+01  |
| 25   | -8.995878e+02 | 2.718969e+02  | 1.606967e+02  |
| 26   | 8.475708e+02  | 1.025389e+03  | -7.495878e+02 |
| 27   | 1.831718e+03  | 6.904354e+02  | -9.616839e+02 |

|    |               |               |               |
|----|---------------|---------------|---------------|
| 28 | -4.774201e+02 | -6.499425e+02 | -4.955815e+02 |
| 29 | -1.481940e+03 | -1.369253e+02 | -1.114922e+03 |
| 30 | 1.187457e+03  | 6.827095e+02  | -1.983495e+02 |
| 31 | -1.194016e+03 | 7.359989e+02  | -3.651619e+02 |
| 32 | 9.029314e+02  | -1.292866e+03 | 1.430297e+03  |
| 33 | 1.752043e+03  | 3.670177e+03  | -7.261252e+03 |
| 34 | -6.796804e+03 | 7.154497e+02  | -2.823889e+03 |
| 35 | -7.434159e+02 | -5.296463e+03 | -1.493070e+03 |
| 36 | 3.439187e+03  | 6.164725e+03  | 7.010132e+03  |
| 37 | 3.967698e+03  | -4.740265e+03 | 5.872958e+03  |
| 38 | -1.263984e+03 | -6.858357e+03 | 1.169118e+03  |
| 39 | -2.913768e+03 | 5.073288e+02  | 2.131546e+03  |
| 40 | -3.773441e+03 | 3.263131e+03  | 5.881910e+02  |
| 41 | 1.508274e+03  | 8.440242e+02  | 8.188180e+02  |
| 42 | 3.880109e+02  | -1.481293e+03 | -5.833341e+02 |
| 43 | 2.220582e+03  | 3.404242e+01  | 2.034643e+02  |
| 44 | -4.087761e+02 | 4.436938e+02  | 9.390080e+02  |
| 45 | -1.427393e+03 | -1.440520e+03 | 5.787379e+02  |
| 46 | -5.118342e+02 | 8.373550e+01  | -9.046957e+02 |
| 47 | 2.389027e+03  | 5.353801e+03  | 6.589871e+02  |
| 48 | 3.383582e+03  | -2.011008e+03 | 3.539231e+03  |
| 49 | -1.016692e+03 | 6.559530e+03  | -2.556460e+03 |
| 50 | 3.959498e+03  | 1.017963e+04  | -4.819461e+03 |
| 51 | -3.828012e+03 | 3.030987e+03  | 2.337664e+03  |
| 52 | -1.072055e+03 | 1.403057e+03  | 1.071035e+03  |
| 53 | 4.118434e+01  | -1.144826e+03 | 1.767023e+03  |
| 54 | -1.567224e+02 | 3.639930e+02  | -7.552597e+02 |
| 55 | -4.561980e+02 | -9.660343e+02 | 9.313917e+02  |
| 56 | -1.293002e+03 | -8.112019e+02 | -4.869634e+03 |
| 57 | 6.480790e+03  | -5.136067e+03 | 1.545790e+02  |
| 58 | -1.940107e+03 | -7.899773e+03 | 4.156272e+03  |
| 59 | 5.152229e+03  | -5.930045e+03 | -1.729464e+03 |
| 60 | 6.393929e+03  | -1.281857e+03 | -2.922377e+03 |
| 61 | -7.377111e+03 | -7.188468e+03 | -3.251267e+03 |
| 62 | 6.732036e+02  | 3.064492e+03  | 3.167444e+03  |
| 63 | -4.003419e+03 | -7.690219e+03 | -4.292204e+03 |
| 64 | 3.229425e+03  | -4.704321e+03 | -3.001724e+02 |
| 65 | -4.363547e+03 | -1.182942e+03 | 4.072640e+03  |
| 66 | 8.166496e+03  | 1.138285e+03  | 6.998467e+03  |
| 67 | -3.647406e+03 | 3.962896e+03  | 4.525645e+02  |

trajectory 40

| atom | VX           | VY           | VZ           |
|------|--------------|--------------|--------------|
| 1    | 5.481760e+01 | 2.426949e+02 | 2.803290e+02 |

|    |               |               |               |
|----|---------------|---------------|---------------|
| 2  | 8.083166e+01  | 1.415956e+02  | 4.527035e+01  |
| 3  | -1.087942e+03 | 7.860273e+02  | 1.768742e+03  |
| 4  | 9.366551e+02  | -1.116707e+02 | -4.699743e+02 |
| 5  | 4.540387e+02  | 3.311045e+02  | -2.339083e+03 |
| 6  | 2.622684e+02  | -3.698710e+03 | -7.918142e+02 |
| 7  | -7.571353e+02 | -1.317480e+03 | 4.391387e+03  |
| 8  | 3.659551e+03  | 1.317240e+03  | 1.008985e+04  |
| 9  | -4.793645e+01 | -6.768212e+02 | 1.819586e+02  |
| 10 | -8.029912e+02 | -1.242102e+03 | 2.880223e+02  |
| 11 | -6.052783e+02 | 1.753636e+03  | -1.199573e+03 |
| 12 | 1.569346e+02  | -5.840868e+03 | 1.352762e+03  |
| 13 | 1.922224e+03  | 1.153996e+03  | -1.819647e+03 |
| 14 | -1.102198e+02 | -7.186780e+02 | -2.048757e+02 |
| 15 | -1.959104e+03 | -1.223719e+03 | -1.308594e+03 |
| 16 | 1.070246e+03  | 1.195060e+03  | 5.938035e+02  |
| 17 | 4.318275e+02  | -1.717329e+02 | -2.328269e+01 |
| 18 | -3.040033e+02 | 7.245178e+02  | 9.814872e+02  |
| 19 | -8.537088e+02 | -7.792759e+02 | 2.277307e+02  |
| 20 | 1.009672e+03  | -2.417369e+02 | 3.731947e+02  |
| 21 | -3.355410e+02 | -1.286044e+03 | 7.241659e+02  |
| 22 | -1.882298e+02 | 1.164090e+03  | 1.021097e+03  |
| 23 | -3.947491e+02 | 1.600324e+02  | -9.617776e+02 |
| 24 | 3.014407e+02  | 7.228360e+02  | -4.989782e+02 |
| 25 | -6.190967e+02 | 6.924263e+02  | 8.857441e+02  |
| 26 | -9.212112e+02 | -7.332026e+02 | -4.370195e+02 |
| 27 | -5.409093e+01 | -1.462120e+03 | -7.362619e+02 |
| 28 | -1.215602e+03 | 2.091216e+02  | 6.224433e+02  |
| 29 | 4.619970e+02  | 2.116180e+02  | 1.090143e+03  |
| 30 | -1.366199e+03 | -2.292706e+02 | -6.442821e+01 |
| 31 | 5.849241e+02  | -4.043055e+02 | -7.780165e+02 |
| 32 | -6.291960e+02 | 1.538562e+02  | 1.285490e+03  |
| 33 | -3.495648e+02 | -4.101045e+02 | -5.701168e+03 |
| 34 | 1.264096e+03  | 1.095818e+04  | -7.477894e+03 |
| 35 | 5.074332e+03  | 6.593918e+01  | -2.797581e+03 |
| 36 | 5.162287e+03  | 4.554243e+03  | 3.679965e+03  |
| 37 | 3.433824e+03  | -4.196858e+03 | -1.797529e+03 |
| 38 | 6.234356e+03  | 2.509278e+03  | -7.900434e+03 |
| 39 | -1.976479e+03 | -2.911123e+03 | -3.029017e+02 |
| 40 | -3.273881e+03 | 6.520304e+03  | -3.229171e+03 |
| 41 | 1.963866e+03  | -1.243360e+03 | -1.100646e+03 |
| 42 | -1.040091e+03 | -1.443783e+02 | -6.388638e+02 |
| 43 | -7.785545e+02 | 4.078411e+02  | 9.197736e+02  |
| 44 | -4.029252e+02 | -1.606057e+03 | 3.181800e+02  |
| 45 | 2.143037e+02  | 7.023161e+02  | -4.097243e+02 |
| 46 | 1.103941e+03  | -2.773204e+02 | 2.059883e+03  |
| 47 | 4.427365e+03  | 3.006190e+03  | -3.916359e+02 |



|    |               |               |               |
|----|---------------|---------------|---------------|
| 48 | -5.565981e+03 | -2.566638e+03 | -3.497251e+02 |
| 49 | 3.334924e+03  | -2.683359e+03 | -7.792428e+02 |
| 50 | 5.398708e+03  | 1.222935e+04  | -4.752268e+03 |
| 51 | 7.862347e+02  | 7.206432e+03  | 2.275986e+03  |
| 52 | -4.174807e+02 | 2.141146e+01  | -2.170975e+03 |
| 53 | -4.579888e+02 | -4.280218e+01 | 6.654940e+02  |
| 54 | -2.998030e+02 | 5.150496e+02  | -2.128535e+02 |
| 55 | -2.623587e+02 | -1.237984e+03 | 1.254485e+03  |
| 56 | 4.462237e+01  | 6.966110e+03  | 5.644884e+02  |
| 57 | -1.849823e+02 | 3.378216e+03  | -3.006781e+03 |
| 58 | -5.441785e+03 | 1.456790e+03  | 8.739515e+03  |
| 59 | 2.949422e+03  | 6.683379e+03  | -9.565565e+03 |
| 60 | -1.111831e+03 | 1.314555e+03  | 4.320678e+02  |
| 61 | 3.327263e+03  | -3.292407e+03 | -3.758951e+03 |
| 62 | -2.735960e+03 | 7.170875e+03  | -7.085755e+03 |
| 63 | 2.439226e+03  | 1.555040e+03  | 4.931484e+02  |
| 64 | 2.727484e+02  | -4.295500e+03 | -8.251301e+02 |
| 65 | -4.512754e+03 | -3.817866e+03 | -6.136103e+03 |
| 66 | -1.889025e+02 | -4.678505e+03 | -4.357158e+03 |
| 67 | 4.527529e+03  | 3.112307e+03  | -7.662640e+03 |

trajectory 41

| atom | VX            | VY            | VZ            |
|------|---------------|---------------|---------------|
| 1    | 4.089408e+01  | 1.894914e+02  | 1.056515e+01  |
| 2    | 1.111477e+03  | -5.767060e+02 | 2.110398e+02  |
| 3    | -6.383802e+02 | 1.282114e+03  | -9.259855e+02 |
| 4    | 1.359430e+02  | -1.427299e+02 | 1.768461e+03  |
| 5    | -6.075434e+02 | 2.460333e+02  | -1.421217e+03 |
| 6    | -9.030629e+02 | 2.440872e+03  | 4.929681e+02  |
| 7    | -1.046210e+03 | 4.980491e+03  | -2.370895e+03 |
| 8    | 8.255734e+03  | -1.552059e+03 | 6.982140e+03  |
| 9    | 5.488115e+02  | -3.603914e+02 | 1.096060e+03  |
| 10   | -5.830646e+02 | 4.570776e+02  | -9.017658e+02 |
| 11   | -1.218529e+03 | 1.165961e+02  | -1.288733e+03 |
| 12   | 4.653280e+03  | -7.030250e+03 | 4.163729e+03  |
| 13   | 2.165618e+03  | 5.430355e+03  | 1.419324e+03  |
| 14   | 1.060855e+03  | 7.474208e+02  | 3.749885e+02  |
| 15   | 7.355662e+02  | 2.433845e+03  | -4.567491e+02 |
| 16   | -1.067848e+03 | -1.847681e+03 | -5.127363e+02 |
| 17   | -3.689100e+01 | 1.943482e+01  | 1.015400e+02  |
| 18   | -1.335897e+02 | 1.699414e+02  | 1.915185e+02  |
| 19   | -4.846596e+02 | -1.326917e+03 | 1.182106e+03  |
| 20   | 4.769732e+02  | 3.576486e+02  | -8.443373e+02 |
| 21   | -4.403262e+02 | -1.192395e+03 | -3.029742e+02 |

|    |               |               |               |
|----|---------------|---------------|---------------|
| 22 | 9.339118e+02  | 4.192605e+02  | 3.133652e+02  |
| 23 | 5.370509e+02  | -1.486111e+02 | 4.377388e+02  |
| 24 | 6.904064e+01  | 1.221644e+02  | 6.160122e+02  |
| 25 | 3.218845e+02  | -9.029953e+02 | 1.631057e+02  |
| 26 | -1.046202e+03 | -7.271664e+02 | -5.417177e+02 |
| 27 | -4.713080e+02 | -1.128356e+03 | -1.388407e+03 |
| 28 | -4.922682e+02 | -8.850972e+02 | 1.565089e+03  |
| 29 | 7.103462e+02  | -7.030142e+02 | -1.511378e+02 |
| 30 | -5.155135e+02 | 1.740042e+03  | -1.639047e+03 |
| 31 | 1.821719e+03  | -1.156645e+03 | 8.090534e+02  |
| 32 | -8.620673e+02 | -6.270049e+02 | -6.167948e+02 |
| 33 | 3.339703e+03  | -4.195277e+03 | 5.838109e+02  |
| 34 | -7.685614e+03 | 1.103985e+03  | 5.297523e+03  |
| 35 | -3.879342e+03 | -5.674116e+03 | -1.958129e+03 |
| 36 | 1.413279e+03  | 6.240498e+03  | 5.482269e+03  |
| 37 | -2.816837e+03 | 6.704677e+03  | -4.708952e+03 |
| 38 | 2.781522e+03  | 1.216498e+03  | -2.477747e+03 |
| 39 | 7.925202e+02  | 6.406822e+03  | -4.925294e+03 |
| 40 | 2.587664e+03  | -4.706242e+03 | -6.114176e+03 |
| 41 | -1.063928e+02 | -2.588846e+02 | -9.113559e+02 |
| 42 | -7.305172e+02 | 1.419598e+03  | -4.181547e+02 |
| 43 | 1.656110e+03  | -4.097518e+02 | 9.111042e+02  |
| 44 | -5.822093e+01 | -8.903244e+01 | 5.718117e+02  |
| 45 | 3.084545e+02  | 5.315525e+02  | 1.026661e+02  |
| 46 | -2.227846e+02 | 9.561540e+02  | -1.498836e+02 |
| 47 | 2.121902e+03  | -1.026557e+04 | 2.169800e+03  |
| 48 | -3.006063e+03 | -6.885960e+03 | 5.766855e+03  |
| 49 | -7.881576e+02 | -9.147359e+02 | 7.328216e+03  |
| 50 | 9.275485e+02  | 2.595932e+02  | -5.176506e+03 |
| 51 | -2.331118e+03 | 5.094643e+02  | -2.816205e+03 |
| 52 | 1.416971e+02  | 6.285248e+02  | 1.235387e+03  |
| 53 | -1.943819e+02 | 1.264094e+03  | 3.311102e+02  |
| 54 | -7.225383e+01 | -2.716401e+02 | -1.072356e+03 |
| 55 | -4.757859e+01 | -1.124176e+03 | 8.987144e+02  |
| 56 | -1.747877e+03 | -6.213577e+03 | 6.487103e+02  |
| 57 | 5.665543e+03  | -4.788265e+03 | -3.294862e+03 |
| 58 | -4.378423e+03 | -2.184966e+01 | 5.234543e+03  |
| 59 | 3.891642e+03  | 6.334342e+03  | -3.018313e+03 |
| 60 | 2.048805e+03  | 1.479783e+03  | -4.421275e+03 |
| 61 | -7.343878e+03 | -9.252617e+02 | -7.135940e+03 |
| 62 | -6.522823e+03 | 1.034068e+04  | -4.453620e+03 |
| 63 | 1.136104e+03  | 2.012839e+03  | 2.773929e+03  |
| 64 | 1.086899e+03  | -3.275253e+03 | 3.009915e+03  |
| 65 | 1.700850e+03  | -8.861187e+01 | 7.891551e+02  |
| 66 | -7.034848e+03 | 2.365047e+03  | -9.935975e+03 |
| 67 | -2.861070e+03 | 1.095592e+03  | -6.873284e+02 |

trajectory 42

| atom | VX            | VY            | VZ            |
|------|---------------|---------------|---------------|
| 1    | 7.973145e+00  | 4.539902e+02  | -1.656560e+02 |
| 2    | -1.654455e+02 | -3.233873e+02 | -8.770584e+02 |
| 3    | 7.279693e+02  | 2.569976e+02  | -9.395568e+02 |
| 4    | -6.118129e+01 | -1.010156e+03 | 6.015971e+02  |
| 5    | 4.106212e+02  | 2.747370e+03  | 1.080992e+03  |
| 6    | 1.611708e+03  | -2.345128e+02 | -1.914323e+03 |
| 7    | -5.559821e+03 | 1.929107e+03  | -5.838117e+03 |
| 8    | -5.695008e+03 | -1.815867e+03 | -5.544400e+03 |
| 9    | -4.869259e+02 | -6.230803e+02 | 8.439067e+02  |
| 10   | 1.370280e+02  | -1.051260e+03 | -2.417136e+02 |
| 11   | -2.652338e+02 | 9.021467e+02  | 8.931270e+02  |
| 12   | -6.660355e+02 | -9.134600e+03 | 1.300783e+03  |
| 13   | 3.025371e+03  | -1.216522e+02 | -4.564304e+03 |
| 14   | 5.642162e+02  | 1.098830e+02  | 1.094409e+03  |
| 15   | 4.190840e+01  | 1.049234e+03  | 4.728418e+02  |
| 16   | -1.769453e+03 | -7.871025e+02 | -1.230499e+03 |
| 17   | -1.940762e+02 | -6.761547e+00 | 1.387448e+01  |
| 18   | 6.515319e+02  | 7.113233e+02  | 6.677288e+01  |
| 19   | 1.603559e+03  | 5.945147e+02  | -1.367963e+03 |
| 20   | -5.011195e+02 | -3.560020e+02 | 4.537300e+02  |
| 21   | 4.094267e+02  | 5.576071e+02  | 2.390115e+02  |
| 22   | -6.278419e+02 | -5.204940e+02 | -1.055148e+03 |
| 23   | -1.351508e+03 | -3.341189e+02 | -1.535146e+02 |
| 24   | 2.337331e+03  | -6.386745e+02 | 5.781186e+02  |
| 25   | 1.121441e+02  | 9.729765e+02  | 6.618092e+02  |
| 26   | -4.294325e+02 | -9.146567e+02 | -4.549381e+02 |
| 27   | -1.658037e+01 | 1.778529e+03  | -1.114192e+03 |
| 28   | -5.160257e+02 | -4.759713e+02 | 1.281427e+03  |
| 29   | 1.183583e+03  | -1.627678e+02 | -2.687639e+02 |
| 30   | 2.905315e+02  | 9.334150e+02  | 1.100995e+03  |
| 31   | 2.440061e+02  | -7.692904e+02 | 4.090087e+02  |
| 32   | -9.532674e+02 | 1.680994e+03  | -8.117335e+02 |
| 33   | -6.482597e+03 | -3.751245e+03 | 3.150097e+03  |
| 34   | 4.853726e+03  | 3.270986e+03  | 4.175764e+03  |
| 35   | 2.875277e+03  | -1.373775e+03 | -1.735674e+03 |
| 36   | 3.839175e+03  | 1.973288e+03  | 8.430117e+03  |
| 37   | -2.787145e+03 | -9.185671e+03 | 1.247305e+02  |
| 38   | -3.586963e+03 | -2.192935e+03 | 7.618914e+03  |
| 39   | -4.198027e+02 | -1.974385e+03 | -3.837946e+03 |
| 40   | 3.786758e+03  | -6.851733e+03 | 2.544335e+03  |
| 41   | 1.024655e+03  | 3.041574e+02  | -8.112217e+02 |

|    |               |               |               |
|----|---------------|---------------|---------------|
| 42 | -2.233316e+03 | -1.202846e+03 | 3.484527e+02  |
| 43 | -1.138358e+03 | 7.049786e+02  | 3.646531e+02  |
| 44 | -5.283111e+01 | -1.646061e+03 | 4.129332e+02  |
| 45 | 8.747306e+02  | 4.146288e+02  | -7.928827e+02 |
| 46 | 3.431983e+02  | 4.215979e+02  | -1.217079e+03 |
| 47 | -2.895988e+03 | 9.658820e+02  | 7.657037e+03  |
| 48 | 5.987417e+03  | 1.666974e+03  | -2.744704e+03 |
| 49 | -4.809731e+03 | -2.129037e+03 | -2.114403e+03 |
| 50 | 5.096295e+03  | -7.931364e+03 | 7.580860e+03  |
| 51 | -3.323545e+03 | -5.492402e+03 | 1.562577e+03  |
| 52 | 9.341722e+02  | -6.072099e+02 | -4.333229e+02 |
| 53 | 2.931043e+02  | 8.776764e+02  | -7.095210e+02 |
| 54 | 2.311351e+01  | 2.184410e+02  | -3.687321e+02 |
| 55 | 1.919942e+03  | -2.851217e+02 | -6.993698e+01 |
| 56 | -3.376102e+03 | -1.616452e+03 | -9.483879e+02 |
| 57 | 8.073985e+02  | 4.448761e+03  | 1.010808e+04  |
| 58 | 3.921765e+01  | -5.177904e+03 | 4.982035e+03  |
| 59 | -3.043214e+03 | -3.161703e+03 | 9.666729e+03  |
| 60 | 6.218531e+03  | -5.266333e+02 | -7.587432e+02 |
| 61 | -1.884682e+02 | -7.417444e+02 | -3.955154e+03 |
| 62 | -7.216150e+03 | -2.066177e+03 | 8.096399e+02  |
| 63 | -4.831898e+03 | -7.101514e+03 | -3.036043e+03 |
| 64 | 2.249747e+03  | -7.209916e+03 | -2.089504e+03 |
| 65 | 1.549804e+03  | -9.841187e+03 | 4.361094e+03  |
| 66 | -1.487797e+03 | 5.012804e+02  | -1.934462e+03 |
| 67 | -6.392616e+03 | 2.059738e+02  | -1.662567e+03 |

trajectory 43

| atom | VX            | VY            | VZ            |
|------|---------------|---------------|---------------|
| 1    | 6.738807e+01  | 1.825278e+02  | -9.658793e+01 |
| 2    | 9.353013e+02  | 2.787413e+02  | 2.220905e+02  |
| 3    | 1.023202e+03  | -1.488706e+03 | -2.358144e+01 |
| 4    | -7.574371e+01 | -8.160058e+01 | 7.858211e+02  |
| 5    | -6.981603e+02 | 4.903513e+02  | -5.310744e+02 |
| 6    | 2.513656e+03  | 1.719123e+03  | 2.698419e+03  |
| 7    | 5.355814e+03  | -5.380283e+03 | 4.672777e+03  |
| 8    | -6.423198e+03 | -6.600193e+03 | -8.314528e+03 |
| 9    | -5.918990e+00 | 9.682017e+02  | 1.046849e+03  |
| 10   | 3.550451e+02  | -7.747402e+02 | 9.754835e+02  |
| 11   | -9.653479e+02 | 1.959968e+03  | -1.419004e+02 |
| 12   | -1.409536e+03 | 2.518199e+03  | -6.866563e+03 |
| 13   | -3.206352e+03 | 2.783543e+03  | -9.588381e+03 |
| 14   | -8.542335e+01 | 5.493634e+01  | 4.664545e+02  |
| 15   | -9.080790e+02 | 1.391543e+03  | 1.433431e+03  |

|    |               |               |               |
|----|---------------|---------------|---------------|
| 16 | -9.095654e+02 | 6.547996e+01  | -9.519429e+02 |
| 17 | 6.422369e+01  | -1.305608e+02 | -2.611904e+02 |
| 18 | -4.436560e+02 | -1.572552e+02 | -1.344271e+02 |
| 19 | 2.536008e+03  | 1.258942e+02  | -6.275198e+02 |
| 20 | 4.263658e+01  | -1.656279e+03 | 2.017666e+02  |
| 21 | -1.193952e+03 | -6.467712e+02 | -1.983244e+02 |
| 22 | 6.275441e+02  | -4.744904e+02 | 7.130285e+02  |
| 23 | 5.817482e+02  | -3.459588e+02 | -8.785067e+02 |
| 24 | 5.272825e+02  | -3.647952e+02 | 6.092771e+01  |
| 25 | -6.374224e+02 | -6.350099e+02 | -5.108364e+02 |
| 26 | -2.839931e+02 | 1.730480e+03  | 1.275654e+03  |
| 27 | 2.852654e+03  | 7.441878e+02  | 4.347926e+02  |
| 28 | -2.090946e+03 | -5.571860e+01 | 2.147977e+02  |
| 29 | 3.706067e+02  | -7.187376e+02 | 7.666578e+02  |
| 30 | 1.147173e+03  | 6.886705e+02  | -2.882147e+02 |
| 31 | -8.671460e+02 | -9.320547e+01 | -5.006530e+02 |
| 32 | 3.120761e+02  | -5.945831e+01 | -1.528871e+02 |
| 33 | -2.512876e+02 | 3.258651e+03  | 1.067025e+03  |
| 34 | 7.173792e+03  | 2.793487e+03  | -1.776288e+02 |
| 35 | -5.022165e+03 | -7.890413e+03 | -7.998236e+03 |
| 36 | -8.979146e+01 | 1.508829e+03  | -5.583250e+03 |
| 37 | -6.319787e+03 | 6.260998e+03  | -2.488262e+03 |
| 38 | 9.615895e+02  | 2.976554e+03  | 1.599757e+03  |
| 39 | -1.754250e+03 | -2.577549e+03 | 4.730130e+03  |
| 40 | -8.177445e+02 | 6.196132e+03  | -9.065421e+02 |
| 41 | 2.775682e+02  | -1.705174e+02 | 2.449680e+02  |
| 42 | 8.720180e+02  | -9.850776e+02 | -2.944970e+02 |
| 43 | 3.730342e+02  | -1.339460e+03 | 1.363388e+03  |
| 44 | -8.885754e+02 | 8.946162e+02  | -1.102870e+03 |
| 45 | -1.057019e+03 | -6.894712e+02 | 5.610769e+02  |
| 46 | -1.676384e+02 | -3.134901e+02 | 5.013443e+02  |
| 47 | -4.624796e+03 | 1.730291e+03  | -2.436397e+03 |
| 48 | -2.481030e+03 | 4.568746e+03  | -1.922856e+03 |
| 49 | 7.902650e+03  | -8.607772e+03 | 9.303115e+01  |
| 50 | 2.596787e+03  | 6.171507e+03  | 9.255211e+02  |
| 51 | -3.206465e+03 | 5.460536e+03  | -6.113854e+02 |
| 52 | -1.673003e+03 | 7.326201e+01  | 2.435019e+02  |
| 53 | -2.029439e+02 | 1.437781e+03  | 9.809313e+02  |
| 54 | -5.873399e+02 | 3.618567e+02  | -1.104977e+01 |
| 55 | 1.413824e+03  | 1.462381e+02  | 5.559733e+00  |
| 56 | 1.089407e+04  | 4.221604e+03  | 1.320698e+02  |
| 57 | 6.411927e+03  | -1.091220e+02 | 4.052786e+03  |
| 58 | -6.748270e+02 | -1.076813e+03 | -9.787671e+02 |
| 59 | 3.415676e+02  | -9.498481e+03 | 2.854849e+03  |
| 60 | -1.416028e+03 | -6.604919e+03 | -6.121686e+03 |
| 61 | -2.097997e+03 | -3.707204e+03 | -3.067465e+03 |

|    |               |               |               |
|----|---------------|---------------|---------------|
| 62 | 3.572793e+03  | 2.058911e+03  | 1.499139e+03  |
| 63 | 3.997510e+02  | -2.253557e+03 | 1.103489e+03  |
| 64 | -1.232984e+04 | 1.163792e+03  | 2.216806e+02  |
| 65 | -7.306752e+02 | -1.911960e+03 | -1.972142e+03 |
| 66 | -6.817233e+03 | -3.507935e+03 | -5.980135e+03 |
| 67 | -5.817676e+02 | -3.547572e+03 | -3.998743e+03 |

trajectory 44

| atom | VX            | VY            | VZ            |
|------|---------------|---------------|---------------|
| 1    | -6.502141e+01 | 1.783376e+02  | -2.816542e+02 |
| 2    | -2.993846e+02 | 1.960897e+02  | -1.607193e+02 |
| 3    | 8.787980e+02  | -2.488402e+03 | -1.278920e+03 |
| 4    | 5.717811e+02  | 5.551468e+02  | 4.909319e+02  |
| 5    | 5.730562e+02  | 1.110159e+03  | 3.840190e+02  |
| 6    | -5.762850e+03 | -1.892862e+03 | -9.971595e+01 |
| 7    | 4.838076e+03  | -4.880877e+03 | -4.244627e+03 |
| 8    | -1.040289e+03 | -6.179827e+03 | 2.072937e+03  |
| 9    | -1.058283e+02 | 1.539702e+03  | 1.940750e+02  |
| 10   | -1.240613e+03 | 7.593444e+02  | -7.985704e+02 |
| 11   | -6.441933e+02 | 6.842295e+02  | 1.524388e+03  |
| 12   | 7.006665e+03  | -3.607131e+03 | 3.429979e+03  |
| 13   | -3.623728e+03 | -3.081536e+03 | 8.116738e+03  |
| 14   | 2.008557e+03  | -1.193139e+01 | 5.840976e+01  |
| 15   | 7.160704e+02  | 4.704902e+02  | -6.648072e+02 |
| 16   | 7.039176e+02  | -1.003373e+03 | -1.950436e+02 |
| 17   | -4.259402e+00 | 1.453922e+02  | 3.568991e+02  |
| 18   | -6.603699e+02 | 5.869325e+01  | -4.098895e+02 |
| 19   | 2.694693e+02  | -1.025216e+03 | 1.267433e+03  |
| 20   | 1.127770e+03  | 3.936710e+02  | -8.960667e+02 |
| 21   | 1.507892e+03  | 5.235502e+02  | -1.333996e+02 |
| 22   | -8.393603e+02 | -1.140200e+03 | 4.339344e+02  |
| 23   | -1.686094e+02 | -1.398716e+03 | -3.698403e+02 |
| 24   | -4.303696e+02 | -3.725755e+02 | 2.716066e+02  |
| 25   | -1.753870e+03 | -1.441643e+02 | -1.138789e+03 |
| 26   | 3.462899e+02  | 8.378740e+02  | 8.635026e+02  |
| 27   | 8.643734e+02  | -9.804540e+01 | 5.049664e+02  |
| 28   | -1.047068e+03 | -3.861721e+02 | -8.220655e+02 |
| 29   | 1.215555e+02  | 6.110108e+01  | 5.536472e+02  |
| 30   | -1.413923e+03 | -1.364727e+01 | 5.368052e+02  |
| 31   | -5.788004e+01 | -3.979470e+02 | -4.393762e+01 |
| 32   | -1.112814e+03 | 1.201786e+03  | -7.896856e+02 |
| 33   | 5.231197e+03  | 1.053858e+03  | 4.880004e+03  |
| 34   | -4.753426e+03 | -4.359956e+03 | 7.036472e+03  |
| 35   | 3.814347e+03  | -5.471418e+03 | -1.993911e+03 |

|    |               |               |               |
|----|---------------|---------------|---------------|
| 36 | -4.477837e+03 | -3.433767e+03 | -2.169723e+03 |
| 37 | 4.018078e+03  | 5.866092e+03  | -5.612846e+03 |
| 38 | 2.623034e+03  | 1.881073e+03  | -1.306137e+03 |
| 39 | -3.004220e+03 | 4.579729e+03  | 2.393790e+03  |
| 40 | 2.697507e+03  | -7.593061e+03 | -7.630099e+03 |
| 41 | 5.303350e+02  | 8.821084e+02  | -1.434187e+03 |
| 42 | -1.738963e+03 | -3.247957e+02 | 9.752358e+02  |
| 43 | 8.868621e+02  | -4.121631e+02 | -2.395005e+01 |
| 44 | -1.743336e+02 | 5.602444e+02  | 1.937841e+03  |
| 45 | -1.359797e+03 | -1.793288e+01 | -6.864475e+02 |
| 46 | 6.926324e+02  | 5.923909e+02  | -6.924787e+02 |
| 47 | -4.732317e+03 | -5.988382e+03 | 5.202753e+03  |
| 48 | 8.629997e+03  | -6.171519e+02 | -2.221833e+03 |
| 49 | 8.330904e+03  | -4.589083e+03 | -4.428137e+03 |
| 50 | 8.759369e+02  | 3.321377e+03  | -1.801091e+03 |
| 51 | 4.306553e+03  | 4.810493e+03  | 2.634544e+03  |
| 52 | 4.078596e+02  | -3.880588e+02 | 4.441290e+01  |
| 53 | -9.070099e+02 | -6.507607e+02 | -3.645673e+02 |
| 54 | -7.101181e+02 | -1.478914e+02 | 3.535389e+02  |
| 55 | -8.001707e+02 | -5.931144e+02 | -2.223193e+02 |
| 56 | -5.935623e+03 | 1.380302e+03  | -5.466654e+01 |
| 57 | -7.928246e+02 | -7.510121e+03 | -6.012230e+03 |
| 58 | -5.984147e+03 | -2.491606e+03 | 5.587415e+02  |
| 59 | 8.521695e+03  | 1.733479e+02  | -7.237379e+03 |
| 60 | -6.766658e+02 | 4.624633e+02  | 2.736509e+02  |
| 61 | -9.766285e+02 | 6.160455e+03  | 3.160087e+02  |
| 62 | -1.072460e+03 | 3.140701e+03  | 2.470868e+03  |
| 63 | -2.125677e+03 | -5.567622e+02 | 6.759833e+03  |
| 64 | 7.229789e+03  | -6.947556e+03 | -4.439590e+03 |
| 65 | -6.115596e+03 | 8.598826e+03  | -1.475248e+03 |
| 66 | 1.649435e+03  | -3.375221e+03 | 3.260810e+03  |
| 67 | 7.750594e+03  | 6.883611e+02  | 2.870830e+03  |

trajectory 45

| atom | VX            | VY            | VZ            |
|------|---------------|---------------|---------------|
| 1    | -2.023430e+02 | -9.803052e+01 | 3.426480e+02  |
| 2    | -6.179154e+00 | -4.557101e+02 | 1.216459e+03  |
| 3    | 3.411393e+02  | 1.373650e+03  | 1.302202e+03  |
| 4    | -6.090209e+02 | 1.448750e+03  | -8.074303e+02 |
| 5    | -3.648210e+01 | 1.447282e+03  | 6.377645e+02  |
| 6    | 1.741795e+03  | -4.005275e+03 | -3.639653e+03 |
| 7    | -2.466434e+03 | -6.878928e+03 | -3.815556e+03 |
| 8    | 8.332241e+03  | -2.864052e+03 | 1.334800e+03  |
| 9    | -8.847211e+02 | -9.945143e+01 | -1.225054e+03 |

|    |               |               |               |
|----|---------------|---------------|---------------|
| 10 | 1.228861e+03  | -5.221920e+02 | -2.375018e+03 |
| 11 | -1.563384e+03 | -7.027056e+02 | 9.280908e+02  |
| 12 | -5.647764e+03 | 4.147615e+03  | -6.099348e+03 |
| 13 | -5.584951e+03 | -3.359144e+03 | 4.288287e+02  |
| 14 | -1.145898e+02 | -1.697569e+02 | 1.468262e+02  |
| 15 | -1.382587e+02 | 1.469068e+02  | -1.240540e+03 |
| 16 | 4.663403e+01  | -6.689115e+02 | -3.406499e+02 |
| 17 | -8.700014e+01 | 4.680063e+01  | 2.035676e+02  |
| 18 | -4.884069e+02 | 5.824538e+02  | 5.590677e+02  |
| 19 | 5.734525e+02  | 6.296824e+02  | -3.433937e+02 |
| 20 | 8.478452e+02  | -8.071660e+02 | -3.851628e+02 |
| 21 | -1.345657e+03 | -8.566296e+02 | -7.666810e+02 |
| 22 | 5.680805e+02  | 2.526280e+03  | -1.788587e+03 |
| 23 | 8.192260e+02  | -4.356985e+01 | -2.521028e+02 |
| 24 | -7.266228e+02 | 1.376461e+03  | -2.243265e+02 |
| 25 | -3.221659e+02 | -5.976010e+02 | 1.567099e+03  |
| 26 | 6.801741e+02  | 1.415859e+03  | -8.778482e+02 |
| 27 | -6.286340e+02 | -8.407354e+02 | 3.649541e+02  |
| 28 | 1.638633e+02  | -2.041940e+02 | 7.160007e+02  |
| 29 | 1.173342e+03  | 8.324620e+02  | -5.848398e+02 |
| 30 | 4.505735e+01  | 2.132992e+03  | 4.208142e+02  |
| 31 | -3.177689e+01 | -1.702629e+03 | 7.030581e+02  |
| 32 | -2.347882e+02 | 1.476384e+03  | -5.699664e+02 |
| 33 | 1.986903e-01  | -8.352261e+03 | 1.857766e+03  |
| 34 | 1.823512e+03  | -1.830691e+03 | -5.648820e+03 |
| 35 | -3.034944e+03 | 4.429922e+03  | 2.279946e+03  |
| 36 | -2.091132e+03 | -3.910957e+02 | -7.479007e+03 |
| 37 | -9.829375e+02 | -1.883962e+03 | 6.429259e+03  |
| 38 | 3.342230e+03  | 5.998866e+02  | -4.764357e+03 |
| 39 | 5.303010e+03  | 1.106324e+02  | 1.031560e+03  |
| 40 | -5.284602e+03 | 4.341009e+03  | -6.898253e+03 |
| 41 | -4.319551e+02 | 3.321051e+02  | 2.509026e+02  |
| 42 | 2.882904e+03  | -4.649014e+02 | 1.270299e+02  |
| 43 | -7.025186e+01 | -6.385766e+01 | 1.879673e+02  |
| 44 | 3.028644e+02  | -5.813253e+02 | 8.184563e+02  |
| 45 | 1.291518e+03  | -6.254231e+02 | -1.374677e+02 |
| 46 | -5.437798e+02 | -7.418160e+01 | -5.588742e+00 |
| 47 | 3.424892e+03  | -4.803003e+03 | 9.847421e+03  |
| 48 | -5.548897e+03 | 1.726259e+03  | -2.161176e+03 |
| 49 | -5.725205e+03 | 3.259985e+03  | 1.546539e+03  |
| 50 | 3.297535e+02  | -6.670013e+02 | -4.423073e+03 |
| 51 | -4.039882e+03 | -6.816013e+03 | 5.669968e+03  |
| 52 | -2.345048e+02 | -1.052343e+03 | 8.842046e+02  |
| 53 | -2.569885e+02 | -7.968965e+02 | 8.284789e+02  |
| 54 | -1.846357e+02 | 5.481931e+02  | -7.126532e+02 |
| 55 | 8.383677e+02  | -1.790837e+03 | -7.104190e+02 |



|    |               |               |               |
|----|---------------|---------------|---------------|
| 56 | -1.275939e+03 | -1.239391e+02 | -4.523850e+03 |
| 57 | 2.004503e+02  | 4.281442e+02  | -2.468089e+03 |
| 58 | 7.454218e+03  | 1.318235e+03  | -5.204354e+03 |
| 59 | 3.458882e+03  | -3.952973e+03 | -3.229359e+03 |
| 60 | 2.534323e+02  | -1.210081e+03 | -3.290746e+03 |
| 61 | -8.904212e+03 | -4.426355e+03 | -7.605992e+02 |
| 62 | 7.742459e+03  | -3.701021e+03 | -2.385822e+03 |
| 63 | -6.631950e+03 | -8.874979e+03 | 2.469981e+01  |
| 64 | 4.097346e+03  | 3.650605e+03  | -1.424180e+03 |
| 65 | 1.510430e+03  | 7.802956e+01  | 3.841384e+03  |
| 66 | 6.091924e+03  | -8.601338e+02 | 1.287552e+04  |
| 67 | 3.543604e+03  | 1.326488e+01  | 1.916056e+03  |

trajectory 46

| atom | VX            | VY            | VZ            |
|------|---------------|---------------|---------------|
| 1    | -1.071995e+02 | 2.877719e+02  | 8.228318e+01  |
| 2    | 8.116990e+02  | -1.431070e+03 | 1.247735e+03  |
| 3    | -6.624374e+02 | 9.629684e+02  | 6.335717e+02  |
| 4    | 2.898312e+02  | 3.858471e+01  | -1.011760e+03 |
| 5    | -6.317909e+02 | -5.892601e+02 | -2.337206e+02 |
| 6    | -9.522957e+03 | -1.930036e+02 | 5.368549e+03  |
| 7    | 2.984280e+03  | 2.203575e+03  | 2.333950e+03  |
| 8    | 2.461737e+03  | 1.690756e+03  | -1.886068e+03 |
| 9    | 6.123929e+02  | -6.850671e+01 | -9.933094e+02 |
| 10   | 3.765416e+02  | -1.047877e+03 | -1.927603e+02 |
| 11   | -1.663567e+03 | 8.236494e+02  | -4.091123e+02 |
| 12   | 2.030638e+03  | -1.336402e+03 | 3.002060e+03  |
| 13   | 1.277577e+03  | -4.343424e+03 | 7.268093e+03  |
| 14   | -1.433827e+03 | 9.953938e+01  | 5.675276e+02  |
| 15   | -4.583434e+01 | -3.436078e+02 | -3.121734e+02 |
| 16   | -8.501698e+02 | 2.490947e+02  | -4.528236e+02 |
| 17   | 2.815771e+02  | -9.107257e+01 | -1.002354e+02 |
| 18   | 4.138125e+02  | -1.172160e+03 | 1.064017e+03  |
| 19   | 1.716702e+02  | 9.541447e+02  | -4.422758e+02 |
| 20   | -6.260631e+02 | -1.152691e+03 | -3.344097e+01 |
| 21   | -1.842360e+01 | 3.668653e+02  | -5.235031e+02 |
| 22   | -1.052651e+03 | -1.601645e+02 | 2.422273e+03  |
| 23   | 1.390685e+03  | 4.763529e+02  | 9.473269e+02  |
| 24   | -1.068587e+02 | -3.426346e+02 | -9.418662e+02 |
| 25   | -1.344208e+03 | 9.446521e+01  | 2.001550e+02  |
| 26   | 1.273210e+03  | 4.729664e+02  | 1.921958e+02  |
| 27   | -2.667775e+01 | -4.495904e+02 | -5.230227e+02 |
| 28   | -1.094298e+03 | 2.000655e+03  | -1.234567e+03 |
| 29   | 1.215308e+03  | -5.068077e+02 | 1.436732e+02  |

|    |               |               |               |
|----|---------------|---------------|---------------|
| 30 | 1.271099e+03  | -4.348498e+02 | -1.313077e+03 |
| 31 | -1.877845e+03 | 9.434576e+02  | 5.715094e+02  |
| 32 | -7.540985e+02 | -6.659895e+02 | -3.791082e+00 |
| 33 | 5.967805e+02  | 6.815594e+03  | -7.330288e+03 |
| 34 | -2.511934e+03 | -4.983035e+03 | 1.674480e+03  |
| 35 | -1.999721e+03 | 2.308070e+03  | 6.247012e+03  |
| 36 | 2.106203e+03  | -8.169252e+03 | 5.621522e+03  |
| 37 | 5.079941e+02  | 1.518698e+03  | -2.855847e+03 |
| 38 | -7.074848e+03 | 2.900322e+02  | 4.077164e+03  |
| 39 | 3.863659e+03  | -3.675942e+03 | 9.329070e+02  |
| 40 | 2.511001e+03  | -6.762451e+03 | -3.539727e+03 |
| 41 | -2.981272e+01 | -1.176259e+03 | 9.224374e+02  |
| 42 | -1.506112e+03 | 2.107916e+03  | -1.081736e+02 |
| 43 | -1.079965e+03 | -7.491374e+02 | 7.451029e+02  |
| 44 | 9.586370e+01  | -5.783589e+02 | -3.659319e+02 |
| 45 | -5.433097e+02 | 1.932840e+02  | 6.164575e+02  |
| 46 | 1.001462e+03  | -8.381799e+02 | -1.183113e+03 |
| 47 | 4.097925e+03  | 3.699740e+03  | 7.089773e+03  |
| 48 | 8.401988e+03  | 1.164697e+03  | -3.668869e+03 |
| 49 | 1.156803e+03  | -7.310612e+03 | -5.496028e+02 |
| 50 | 2.581384e+03  | -5.903858e+03 | -1.054579e+03 |
| 51 | 6.716138e+03  | 9.482738e+03  | -1.248757e+03 |
| 52 | 1.997766e+03  | -2.265283e+02 | 4.057781e+02  |
| 53 | -2.926593e+02 | -3.474436e+02 | -1.574750e+03 |
| 54 | 1.470626e+03  | 5.216732e+02  | 4.665580e+02  |
| 55 | 4.071019e+02  | 1.831959e+03  | -6.806202e+02 |
| 56 | -5.387534e+03 | -7.324701e+03 | -5.372664e+03 |
| 57 | 4.206708e+03  | 5.645733e+02  | -2.126034e+02 |
| 58 | -1.303872e+03 | 4.718826e+02  | -3.145600e+03 |
| 59 | -2.535509e+03 | 2.352446e+03  | 3.255322e+03  |
| 60 | -2.498271e+03 | 2.322202e+03  | -1.221021e+03 |
| 61 | 6.284717e+03  | 7.595232e+03  | 3.475045e+03  |
| 62 | -1.017353e+03 | 1.791204e+03  | 1.611636e+03  |
| 63 | 8.698217e+02  | 2.305123e+03  | 2.566788e+03  |
| 64 | -1.014127e+04 | -2.098349e+03 | 1.595139e+03  |
| 65 | 3.093023e+03  | -2.092835e+03 | -8.454911e+03 |
| 66 | 3.188309e+03  | 1.780392e+03  | 1.421927e+03  |
| 67 | -2.649853e+03 | -8.426402e+03 | 6.043043e+03  |

trajectory 47

| atom | VX            | VY            | VZ            |
|------|---------------|---------------|---------------|
| 1    | 1.453649e+02  | -3.132303e+01 | -4.300634e+02 |
| 2    | 1.274700e+02  | 1.142863e+03  | -1.508127e+03 |
| 3    | -5.876988e+02 | 2.389953e+02  | -8.873600e+02 |

|    |               |               |               |
|----|---------------|---------------|---------------|
| 4  | 3.373559e+02  | -8.048141e+02 | -5.177112e+02 |
| 5  | 1.992820e+02  | -1.800276e+02 | -2.005855e+02 |
| 6  | -3.965225e+03 | 3.934095e+03  | -2.065108e+03 |
| 7  | 3.368213e+03  | 2.299571e+03  | 2.833844e+03  |
| 8  | 1.028447e+04  | 1.708267e+03  | 4.571093e+03  |
| 9  | -5.944075e+02 | -1.764649e+02 | 1.276471e+03  |
| 10 | 1.380442e+03  | -7.164701e+02 | 1.811209e+02  |
| 11 | 7.215886e+02  | 1.072876e+03  | 8.159236e+02  |
| 12 | 3.997041e+03  | -3.012642e+03 | 1.027977e+03  |
| 13 | -1.189545e+03 | -4.916327e+03 | 7.207048e+03  |
| 14 | 1.081897e+02  | 1.218151e+03  | 1.218062e+03  |
| 15 | -1.111415e+02 | 7.829265e+02  | -1.808983e+03 |
| 16 | -2.594017e+02 | -6.476313e+02 | 2.958096e+02  |
| 17 | -3.150393e+01 | -3.161129e+02 | 1.401827e+02  |
| 18 | -1.024610e+03 | -1.296285e+02 | 8.469797e+02  |
| 19 | 2.138142e+03  | 1.932456e+02  | 1.981799e+02  |
| 20 | -7.570681e+02 | 6.363582e+02  | -4.359830e+02 |
| 21 | 1.228134e+02  | 1.727233e+03  | -1.723616e+02 |
| 22 | 2.015355e+03  | -1.097995e+03 | -2.025703e+02 |
| 23 | -1.312327e+03 | 7.923994e+02  | -7.867920e+01 |
| 24 | 3.194256e+02  | -5.985132e+02 | -1.379368e+02 |
| 25 | -8.092484e+02 | 3.254684e+02  | 1.320203e+03  |
| 26 | 1.054486e+03  | 1.004279e+03  | 6.510301e+02  |
| 27 | -8.383662e+02 | -8.395758e+01 | -3.074484e+02 |
| 28 | -3.604461e+02 | -1.067655e+03 | 5.814918e+02  |
| 29 | 1.517874e+03  | -3.758640e+02 | -7.131251e+02 |
| 30 | -9.892334e+02 | -3.387123e+02 | -2.618264e+03 |
| 31 | 1.273037e+03  | -1.643049e+03 | 1.004651e+02  |
| 32 | -6.487189e+02 | 1.586266e+02  | 1.414086e+03  |
| 33 | -3.194575e+03 | 3.615849e+03  | 4.147616e+02  |
| 34 | 8.442227e+03  | -1.215537e+03 | -4.652321e+03 |
| 35 | 1.970663e+03  | 6.729335e+03  | 4.275146e+03  |
| 36 | 2.882989e+03  | -4.116140e+03 | 9.296126e+02  |
| 37 | 9.715126e+02  | 5.865955e+03  | -2.541923e+03 |
| 38 | 4.216216e+01  | 1.166365e+03  | -1.888777e+03 |
| 39 | -1.887744e+03 | -6.263443e+02 | -5.395028e+02 |
| 40 | 6.973961e+03  | 1.781373e+03  | -3.236619e+03 |
| 41 | -8.559522e+02 | 5.414638e+02  | -1.116415e+03 |
| 42 | -1.456307e+03 | 5.660175e+02  | 4.254661e+02  |
| 43 | -1.075703e+03 | -1.153945e+03 | 1.059579e+03  |
| 44 | 6.475852e+02  | -8.113646e+02 | 1.591769e+03  |
| 45 | -1.407477e+03 | 2.419847e+03  | -4.545782e+02 |
| 46 | -4.414695e+02 | -5.249887e+02 | 1.297996e+03  |
| 47 | -1.043143e+04 | -2.615251e+03 | -6.545764e+03 |
| 48 | 9.945926e+03  | 5.315803e+03  | -3.808247e+03 |
| 49 | -3.936733e+02 | 2.448528e+03  | -3.913515e+03 |

|    |               |               |               |
|----|---------------|---------------|---------------|
| 50 | -1.379996e+03 | -2.217926e+03 | 8.964702e+02  |
| 51 | 3.612205e+02  | 3.041370e+03  | -6.162832e+02 |
| 52 | -1.041605e+03 | -3.758575e+02 | 7.674189e+02  |
| 53 | -1.137212e+03 | 1.246191e+02  | 7.193194e+02  |
| 54 | 1.428766e+03  | -4.356252e+02 | 5.420945e+02  |
| 55 | -1.099923e+02 | -9.458364e+02 | 3.406254e+02  |
| 56 | 2.981427e+03  | 3.043691e+03  | 7.369996e+02  |
| 57 | 2.613183e+03  | -7.581548e+03 | -5.301465e+03 |
| 58 | 3.466651e+03  | 1.900383e+03  | -2.267253e+03 |
| 59 | 2.164018e+03  | -2.209343e+03 | -1.769320e+03 |
| 60 | -3.288349e+03 | -4.830100e+03 | -4.653676e+03 |
| 61 | 4.406319e+03  | 6.808967e+03  | 3.425098e+03  |
| 62 | 8.022941e+00  | -3.737406e+03 | -1.327390e+03 |
| 63 | -2.775385e+03 | 1.605136e+03  | -1.013920e+04 |
| 64 | -1.066517e+04 | 1.050559e+03  | -3.579053e+02 |
| 65 | -2.197995e+03 | -3.805403e+02 | -3.090790e+03 |
| 66 | -5.981020e+03 | -2.788855e+03 | 2.969078e+03  |
| 67 | 7.693924e+03  | 1.472695e+03  | -6.049142e+03 |

trajectory 48

| atom | VX            | VY            | VZ            |
|------|---------------|---------------|---------------|
| 1    | -4.239314e+02 | 1.009993e+02  | -1.876142e+01 |
| 2    | -5.336716e+02 | -9.133931e+02 | 9.979621e+02  |
| 3    | 8.920778e+02  | -2.084529e+02 | 1.495756e+03  |
| 4    | 3.826371e+01  | 1.877536e+02  | 2.302233e+01  |
| 5    | 3.439706e+01  | 1.479901e+03  | -9.934053e+02 |
| 6    | -6.213136e+03 | -2.661778e+03 | 5.340050e+03  |
| 7    | 2.154206e+03  | 5.666946e+03  | -5.629100e+02 |
| 8    | 6.339665e+03  | 4.076162e+02  | -5.695102e+03 |
| 9    | -6.487524e+02 | -1.160685e+02 | -4.557431e+02 |
| 10   | 7.398856e+02  | 7.491842e+02  | 3.527433e+02  |
| 11   | 7.025235e+02  | -1.023824e+03 | 5.761942e+02  |
| 12   | -4.457965e+03 | 2.777487e+03  | -3.889182e+02 |
| 13   | -5.300659e+03 | 7.848504e+03  | -5.859424e+03 |
| 14   | -7.172483e+02 | -2.015100e+02 | 1.695075e+02  |
| 15   | -2.210127e+03 | -1.460448e+03 | -2.045458e+02 |
| 16   | 1.655286e+02  | 2.577262e+02  | -3.105897e+02 |
| 17   | 3.146083e+02  | 4.079794e+01  | -1.358822e+02 |
| 18   | -9.756624e+02 | 2.572187e+02  | -2.231391e+02 |
| 19   | 1.398337e+03  | -1.661351e+03 | -4.890876e+02 |
| 20   | 9.781828e+02  | 7.641957e+02  | -9.770665e+01 |
| 21   | -4.506375e+02 | 4.116898e+02  | -2.352807e+02 |
| 22   | -1.827396e+03 | 8.958113e+02  | -9.705899e+01 |
| 23   | 9.133335e+02  | -1.513070e+03 | -2.652923e+02 |

|    |               |               |               |
|----|---------------|---------------|---------------|
| 24 | -1.852227e+02 | 3.961587e+02  | -7.944905e+01 |
| 25 | -8.841879e+02 | 1.110117e+02  | -1.171860e+01 |
| 26 | 6.403586e+01  | -6.413679e+02 | -5.431723e+02 |
| 27 | -1.664725e+03 | 1.829120e+03  | 3.003389e+02  |
| 28 | -3.674883e+02 | 7.136186e+01  | 1.022328e+03  |
| 29 | 8.762690e+02  | -4.473982e+01 | 1.042629e+03  |
| 30 | 9.618015e+02  | -2.637832e+02 | 1.153606e+03  |
| 31 | -4.515885e+02 | 1.241982e+03  | -4.573780e+02 |
| 32 | 1.160173e+03  | -9.569959e+02 | -1.274875e+03 |
| 33 | -6.587798e+02 | 3.224179e+03  | -1.788471e+03 |
| 34 | 7.236360e+03  | 4.219720e+03  | -7.113918e+02 |
| 35 | -8.682699e+02 | -6.559379e+03 | -6.269105e+03 |
| 36 | -2.746389e+03 | -3.175049e+03 | -6.663957e+02 |
| 37 | 3.928459e+03  | -6.281932e+03 | -3.036944e+03 |
| 38 | 9.492036e+03  | 1.797732e+03  | -4.364863e+03 |
| 39 | 3.204213e+03  | -4.426155e+02 | -8.514186e+03 |
| 40 | 2.534842e+03  | -6.379667e+03 | 2.540494e+03  |
| 41 | -1.913232e+02 | -9.323836e+02 | -9.427285e+02 |
| 42 | 2.187699e+02  | 1.107040e+03  | -1.441357e+03 |
| 43 | 1.863393e+02  | -3.255487e+02 | -3.887846e+02 |
| 44 | -2.771494e+02 | 1.297144e+02  | 2.411132e+02  |
| 45 | 1.359629e+03  | 3.303454e+02  | 5.529559e+02  |
| 46 | -8.873170e+01 | -2.414831e+03 | 3.035798e+03  |
| 47 | 2.919795e+01  | -4.800333e+03 | 2.438102e+03  |
| 48 | 2.793488e+03  | 4.709617e+03  | -4.304329e+02 |
| 49 | 7.794429e+03  | -4.633891e+03 | -9.762929e+02 |
| 50 | 3.367539e+03  | -7.848322e+02 | -9.670183e+03 |
| 51 | 7.399819e+02  | 1.727871e+03  | -5.877144e+02 |
| 52 | 1.084072e+03  | 1.184073e+03  | 8.350867e+02  |
| 53 | -1.239849e+03 | -1.716456e+03 | 9.786793e+02  |
| 54 | -1.598656e+02 | 6.807039e+02  | 2.279865e+02  |
| 55 | 7.845139e+02  | 1.027988e+03  | 9.025993e+02  |
| 56 | -7.991550e+03 | 2.549597e+03  | -6.205299e+03 |
| 57 | -5.882314e+03 | 6.479531e+02  | -1.785226e+03 |
| 58 | 3.555290e+03  | -1.486422e+02 | 1.872812e+03  |
| 59 | 9.869863e+03  | -2.058741e+03 | -4.643048e+03 |
| 60 | -5.291577e+03 | -2.326792e+03 | 4.466384e+03  |
| 61 | -5.902890e+02 | -6.651358e+02 | 5.116244e+03  |
| 62 | -4.407751e+03 | 9.489522e+03  | -4.340939e+03 |
| 63 | 1.671564e+03  | 2.317002e+03  | 9.891623e+02  |
| 64 | 1.641214e+03  | -1.352746e+03 | 6.205485e+02  |
| 65 | 3.798416e+03  | -7.067093e+03 | 5.041464e+03  |
| 66 | -2.590986e+03 | 5.630113e+03  | -3.520780e+02 |
| 67 | -4.962390e+03 | -2.120932e+03 | -2.059797e+03 |

trajectory 49

| atom | VX            | VY            | VZ            |
|------|---------------|---------------|---------------|
| 1    | -6.234091e+01 | -1.863720e+02 | 7.649480e+01  |
| 2    | 1.073294e+03  | -2.575851e+02 | -1.758849e+02 |
| 3    | -7.031506e+00 | -1.706633e+03 | 1.652701e+03  |
| 4    | -9.911381e+02 | 5.951498e+00  | -6.964486e+01 |
| 5    | 1.627089e+02  | 5.195756e+01  | -5.327978e+02 |
| 6    | -1.247772e+04 | 2.519460e+03  | 3.238925e+03  |
| 7    | -1.161878e+03 | 4.350226e+03  | -1.595741e+03 |
| 8    | 3.423985e+03  | -3.345188e+03 | -1.429646e+03 |
| 9    | 1.656058e+03  | -2.806816e+01 | 3.310529e+02  |
| 10   | 1.866659e+03  | 3.799516e+02  | 6.475910e+01  |
| 11   | 6.447414e+01  | -2.691489e+02 | -1.615916e+02 |
| 12   | 2.256146e+03  | 5.727067e+03  | -4.712937e+03 |
| 13   | -5.434334e+03 | 4.944531e+02  | 5.273752e+03  |
| 14   | -1.538155e+03 | -2.039370e+02 | -1.656289e+03 |
| 15   | 7.373223e+02  | 1.078951e+03  | -2.835616e+03 |
| 16   | -6.490286e+02 | -6.038457e+02 | 2.598740e+02  |
| 17   | 6.504873e+01  | -1.230036e+02 | 2.060781e+02  |
| 18   | -4.222221e+02 | 4.699997e+02  | -3.734333e+02 |
| 19   | 1.542734e+03  | -1.858028e+02 | 2.384066e+02  |
| 20   | -4.766632e+02 | 4.046342e+02  | -2.407775e+02 |
| 21   | -6.665808e+02 | 6.302386e+02  | 1.069642e+02  |
| 22   | -2.978387e+02 | 1.528269e+02  | 2.626287e+02  |
| 23   | 6.512361e+02  | -6.359379e+02 | 2.502876e+02  |
| 24   | 1.241525e+03  | 2.188889e+03  | -6.817638e+02 |
| 25   | 2.738739e+02  | 5.165710e+01  | 1.094985e+03  |
| 26   | -1.283632e+03 | -7.656271e+02 | -6.840170e+01 |
| 27   | 1.484567e+03  | 1.135978e+03  | 6.655599e+02  |
| 28   | -1.331122e+03 | 1.104916e+02  | 1.059234e+02  |
| 29   | -3.219102e+02 | 1.610987e+03  | -3.570882e+02 |
| 30   | 6.333655e+01  | -2.749736e+02 | -5.323735e+02 |
| 31   | -2.462828e+03 | 1.160508e+03  | 1.086367e+03  |
| 32   | 4.504083e+02  | -2.162352e+03 | -5.104395e+02 |
| 33   | 2.525491e+03  | -9.528763e+03 | 6.423716e+03  |
| 34   | 1.714049e+03  | -1.080706e+03 | -9.992859e+02 |
| 35   | -3.279889e+02 | -4.584598e+03 | -2.878415e+03 |
| 36   | 6.480320e+03  | 3.371652e+03  | 3.389616e+03  |
| 37   | 6.302930e+03  | -1.871142e+03 | 4.315204e+03  |
| 38   | 4.953527e+03  | 4.347379e+03  | 3.104735e+03  |
| 39   | 9.123194e+02  | -1.608153e+03 | -6.495391e+02 |
| 40   | -2.771189e+03 | 1.853783e+03  | 3.072573e+03  |
| 41   | 5.305813e+00  | 9.590886e+02  | 7.185872e+01  |
| 42   | -1.233103e+03 | 1.144075e+03  | -1.103851e+03 |
| 43   | 1.586712e+03  | -1.422745e+03 | 4.048746e+02  |

|    |               |               |               |
|----|---------------|---------------|---------------|
| 44 | -1.268185e+03 | 9.814249e+02  | -9.270326e+02 |
| 45 | -1.603460e+03 | -1.238133e+03 | 4.119774e+02  |
| 46 | 2.262438e+02  | 1.038729e+03  | 6.536179e+02  |
| 47 | 3.425682e+03  | -4.523505e+03 | 3.405376e+03  |
| 48 | 7.359229e+03  | -4.368234e+03 | -4.894625e+03 |
| 49 | 4.446265e+03  | -8.553220e+03 | 2.354306e+03  |
| 50 | 7.638549e+03  | 1.498427e+03  | -2.199241e+03 |
| 51 | 4.088792e+03  | 1.127802e+03  | -3.412865e+02 |
| 52 | 8.438640e+01  | 8.602035e+02  | 9.848857e+01  |
| 53 | 6.576594e+02  | 1.239324e+03  | 3.911018e+02  |
| 54 | -1.284775e+03 | 1.972156e+02  | 2.681779e+02  |
| 55 | 1.077033e+03  | -1.248541e+03 | 1.030308e+03  |
| 56 | -3.222295e+03 | -8.780906e+02 | -8.516203e+01 |
| 57 | -3.349519e+03 | -2.155511e+03 | 2.906390e+02  |
| 58 | 2.438296e+03  | 5.890176e+02  | -1.212499e+04 |
| 59 | -4.000901e+03 | -2.366190e+03 | -5.847897e+02 |
| 60 | -1.902386e+03 | -8.751143e+03 | -2.356646e+03 |
| 61 | -1.803842e+03 | -3.548337e+03 | -6.121942e+02 |
| 62 | 7.085188e+03  | -6.665438e+03 | 6.486279e+03  |
| 63 | -5.955057e+03 | -2.250674e+03 | -4.890991e+03 |
| 64 | -3.831399e+03 | 3.979241e+03  | -2.587031e+03 |
| 65 | -7.845217e+02 | -5.547427e+02 | -4.338713e+02 |
| 66 | -1.583247e+03 | -1.445891e+03 | -1.977297e+03 |
| 67 | 4.218807e+03  | 6.239311e+03  | -7.098001e+03 |

trajectory 50

| atom | VX            | VY            | VZ            |
|------|---------------|---------------|---------------|
| 1    | -1.459470e+02 | 3.885358e+02  | 2.335739e+02  |
| 2    | 6.481606e+02  | 8.636901e+02  | -1.001984e+02 |
| 3    | 6.710816e+02  | -2.238895e+03 | -8.803869e+02 |
| 4    | 2.255032e+02  | 3.378202e+02  | -6.549827e+01 |
| 5    | 1.872806e+02  | 2.750419e+02  | 1.449100e+02  |
| 6    | 6.906379e+02  | -1.925192e+03 | 8.754501e+03  |
| 7    | 3.256885e+02  | -2.070494e+03 | -1.068977e+04 |
| 8    | -1.530169e+02 | -3.087210e+03 | -1.372653e+03 |
| 9    | -5.089659e+02 | 7.929563e+02  | 5.090677e+02  |
| 10   | -4.291380e+02 | 3.284203e+02  | -8.892614e+02 |
| 11   | 8.724026e+02  | 1.008577e+03  | -9.776121e+02 |
| 12   | -4.639905e+03 | 1.831241e+02  | 3.856277e+03  |
| 13   | 2.814955e+03  | -7.549945e+03 | 2.262069e+03  |
| 14   | -5.470721e+02 | -7.349427e+01 | -1.631959e+02 |
| 15   | -1.519515e+03 | -8.767436e+00 | -8.458887e+02 |
| 16   | 4.565654e+02  | -1.103872e+02 | 8.358701e+02  |
| 17   | 1.553304e+02  | 3.735970e+01  | -2.313127e+02 |

|    |               |               |               |
|----|---------------|---------------|---------------|
| 18 | -1.535334e+03 | 2.817771e+02  | 8.617479e+02  |
| 19 | 1.908090e+03  | -2.343747e+02 | -1.251358e+03 |
| 20 | 1.026252e+03  | -1.122213e+03 | 9.390853e+02  |
| 21 | -1.359741e+03 | -1.975713e+02 | 1.299887e+03  |
| 22 | -1.217432e+01 | -2.482092e+02 | -9.172069e+02 |
| 23 | 3.415174e+02  | 4.274856e+02  | 3.959849e+01  |
| 24 | -1.628812e+03 | -5.800373e+01 | 3.309460e+02  |
| 25 | 1.706738e+02  | -5.774561e+02 | -1.540584e+03 |
| 26 | 3.424443e+02  | 4.757049e+02  | 4.118358e+02  |
| 27 | -9.515766e+02 | -1.534699e+03 | 1.802234e+01  |
| 28 | -1.906798e+02 | 1.334267e+03  | -5.821458e+02 |
| 29 | 1.351879e+03  | -1.474519e+01 | 6.458150e+02  |
| 30 | 5.481091e+02  | -1.322833e+03 | 1.927818e+02  |
| 31 | 3.564984e+02  | 1.054178e+03  | -7.193056e+02 |
| 32 | -9.841984e+02 | -1.099549e+03 | 1.353998e+03  |
| 33 | 3.252863e+03  | 5.231158e+03  | -7.179166e+03 |
| 34 | -2.151652e+03 | -1.864089e+03 | 2.255029e+02  |
| 35 | -2.100787e+03 | 8.986910e+02  | 8.670281e+03  |
| 36 | 8.113028e+03  | 5.218504e+02  | -8.561377e+02 |
| 37 | -1.627980e+03 | -1.094086e+04 | -1.083603e+03 |
| 38 | -1.890145e+03 | 3.699935e+03  | 2.010547e+03  |
| 39 | -3.115224e+03 | -4.555064e+03 | 5.260921e+03  |
| 40 | 4.802281e+03  | -5.485941e+03 | 2.797044e+03  |
| 41 | 1.155798e+02  | 1.365791e+01  | 9.737956e+01  |
| 42 | -5.178821e+02 | 4.427393e+01  | -7.169838e+02 |
| 43 | 1.571242e+02  | 9.816008e+01  | 5.538993e+02  |
| 44 | -9.983685e+02 | -1.220994e+03 | -2.003860e+02 |
| 45 | 1.713476e+03  | -3.343416e+02 | 9.510590e+02  |
| 46 | 1.091526e+03  | 6.570961e+02  | 2.166037e+02  |
| 47 | -4.654562e+03 | 3.498853e+03  | 5.835945e+02  |
| 48 | -5.672092e+03 | 2.098618e+03  | 3.722536e+02  |
| 49 | 1.211281e+03  | -4.678229e+03 | -1.353852e+03 |
| 50 | -1.649151e+03 | 8.173931e+03  | -8.012574e+03 |
| 51 | 3.336940e+03  | 3.330049e+03  | -1.573797e+03 |
| 52 | 7.032715e+02  | 8.823733e+02  | 1.881124e+03  |
| 53 | 2.005042e+03  | -1.110540e+03 | -2.118747e+03 |
| 54 | -1.492547e+03 | -2.827579e+02 | -1.364637e+03 |
| 55 | -2.334571e+02 | -4.841306e+02 | 4.617881e+02  |
| 56 | -4.420298e+03 | 7.542265e+03  | -3.399281e+03 |
| 57 | 3.636353e+02  | -3.063404e+03 | -6.626967e+03 |
| 58 | -3.411557e+03 | -5.812889e+03 | 3.688611e+03  |
| 59 | -3.118901e+03 | 2.217333e+03  | -6.667159e+02 |
| 60 | -6.991230e+03 | 4.461421e+03  | 3.250073e+03  |
| 61 | -6.984300e+03 | 2.451814e+02  | -9.731259e+02 |
| 62 | 2.040224e+03  | 3.181269e+02  | 7.441242e+03  |
| 63 | 6.940286e+03  | 2.978281e+03  | 1.621307e+02  |



|    |               |               |               |
|----|---------------|---------------|---------------|
| 64 | 3.244650e+03  | -1.434687e+03 | -1.359989e+03 |
| 65 | -1.230229e+03 | 6.321503e+01  | -3.361027e+03 |
| 66 | -3.879526e+03 | -4.746479e+03 | -8.139373e+02 |
| 67 | 8.607564e+03  | 5.768660e+03  | -1.125522e+03 |

## Dynamic IRC

| atom | VX            | VY            | VZ            |
|------|---------------|---------------|---------------|
| 1    | -9.365895e+00 | -4.157890e+00 | -2.270520e-01 |
| 2    | 7.437372e+01  | 1.219695e+02  | 1.526499e+02  |
| 3    | 3.675404e+00  | -2.579878e+01 | -1.179251e+01 |
| 4    | -2.171185e+00 | 9.252369e+00  | -2.398237e+00 |
| 5    | -2.242139e+00 | -2.185376e+00 | -7.521098e-01 |
| 6    | -4.668757e+00 | -1.291358e+00 | -5.931734e+00 |
| 7    | -5.179624e+00 | 5.463439e+00  | -8.386734e+00 |
| 8    | -2.227948e+00 | 5.264768e+00  | -6.513554e+00 |
| 9    | 2.611098e+00  | 8.869219e+00  | -7.180520e+00 |
| 10   | 2.498991e+01  | -9.635520e+00 | -2.646575e+01 |
| 11   | 4.541040e-01  | -8.230635e+00 | -1.541116e+01 |
| 12   | -3.888266e+00 | -1.255881e+01 | -2.191052e+01 |
| 13   | 3.028306e+01  | 1.363731e+01  | 1.543954e+01  |
| 14   | 3.746358e+00  | 3.519306e+00  | 5.874971e+00  |
| 15   | 5.676300e-01  | 1.078497e+00  | 1.192023e+00  |
| 16   | 2.369855e+00  | 2.384046e+00  | 9.223988e-01  |
| 17   | -1.291358e+00 | -7.521098e-01 | -1.021734e+00 |
| 18   | 1.206214e+00  | -1.262977e+00 | 7.095375e-01  |
| 19   | 5.392485e-01  | 4.541040e-01  | -9.933525e-02 |
| 20   | 1.546792e+00  | 2.838150e-01  | 5.094479e+00  |
| 21   | -1.518410e+00 | -4.966763e-01 | 2.980058e-01  |
| 22   | 2.838150e+00  | 5.676300e-02  | 0.000000e+00  |
| 23   | -1.717081e+00 | -1.560983e-01 | 5.534393e-01  |
| 24   | -1.560983e-01 | 2.980058e-01  | 2.838150e-01  |
| 25   | 4.569422e+00  | 4.015982e+00  | 8.798265e-01  |
| 26   | 2.923295e+00  | 1.177832e+00  | -4.824855e-01 |
| 27   | 9.909401e+01  | 3.185823e+01  | 1.048980e+02  |
| 28   | -2.199566e+01 | 2.141384e+01  | -4.227425e+01 |
| 29   | 8.457687e+00  | -1.490029e+00 | -1.648965e+01 |
| 30   | -2.083202e+01 | 9.039508e+00  | -4.739711e+00 |
| 31   | -2.029277e+00 | -2.277615e+01 | -1.104040e+01 |
| 32   | -4.819179e+01 | -1.192023e+01 | -4.697138e+00 |
| 33   | -5.687653e+01 | -1.667413e+01 | -3.036821e+00 |
| 34   | -1.031668e+01 | -2.481962e+01 | -2.324445e+01 |
| 35   | -7.038612e+00 | -7.379190e-01 | -5.619537e+00 |
| 36   | -3.490925e+00 | -1.261558e+01 | -1.055792e+01 |
| 37   | -2.313092e+00 | 4.952572e+00  | -1.084173e+01 |
| 38   | -2.110165e+01 | 3.534916e+01  | -3.520725e+01 |
| 39   | -4.496765e+02 | -7.256156e+02 | -8.915907e+02 |
| 40   | -2.393980e+02 | -2.697662e+02 | -5.230143e+02 |
| 41   | 4.470086e+00  | -1.915751e+00 | 4.257225e-02  |

|    |               |               |               |
|----|---------------|---------------|---------------|
| 42 | 3.292254e+00  | -2.639480e+00 | 3.022630e+00  |
| 43 | 4.682948e+00  | 2.284711e+00  | 2.086040e+00  |
| 44 | 4.910000e+00  | -4.086936e+00 | 7.946820e-01  |
| 45 | 5.676300e+00  | -6.102023e-01 | -2.838150e-02 |
| 46 | 1.546792e+00  | -3.093584e+00 | 1.206214e+00  |
| 47 | -1.575173e+00 | -5.463439e+00 | -3.249682e+00 |
| 48 | 1.404884e+00  | -4.526849e+00 | -2.738815e+00 |
| 49 | 4.384942e+00  | -4.952572e+00 | -1.532601e+00 |
| 50 | 3.249682e+00  | -4.214653e+00 | -3.973410e+00 |
| 51 | -1.844798e-01 | -6.059450e+00 | -1.139517e+01 |
| 52 | -9.791618e-01 | -1.929942e+00 | 4.682948e-01  |
| 53 | -4.541040e-01 | -1.702890e-01 | -9.933525e-02 |
| 54 | -3.689595e-01 | 2.270520e-01  | 1.702890e-01  |
| 55 | -2.242139e+00 | 6.953468e-01  | 1.589364e+00  |
| 56 | 7.521098e-01  | -5.718872e+00 | 1.490029e+00  |
| 57 | -1.986705e-01 | -1.717081e+00 | 7.095375e-01  |
| 58 | 9.223988e-01  | -3.476734e+00 | 1.759653e+00  |
| 59 | 5.392485e-01  | -1.702890e-01 | 5.960115e-01  |
| 60 | 7.237283e-01  | 3.121965e-01  | -9.365895e-01 |
| 61 | -6.243930e-01 | 4.824855e-01  | -7.237283e-01 |
| 62 | 1.419075e-01  | 4.257225e-02  | -4.257225e-02 |
| 63 | -3.973410e-01 | 0.000000e+00  | -2.838150e-02 |
| 64 | -8.514450e-02 | 8.230635e-01  | -7.095375e-01 |
| 65 | -2.710433e+00 | 9.791618e-01  | 2.398237e+00  |
| 66 | -4.086936e+00 | 2.426618e+00  | 5.278959e+00  |
| 67 | -2.086040e+00 | 2.767196e+00  | 3.221300e+00  |

## s-cis TS1

### random sampling

initial velocities for 50 trajectories starting from s-cis TS1 using completely random sampling

trajectory 1

| atom | VX | VY | VZ |
|------|----|----|----|
|------|----|----|----|

trajectory 1

| atom | VX            | VY            | VZ            |
|------|---------------|---------------|---------------|
| 1    | 2.360128e+02  | 4.961591e+01  | -9.679038e+01 |
| 2    | 4.627955e+02  | -8.093237e+02 | 1.217912e+03  |
| 3    | -7.775823e+02 | 4.572718e+02  | -9.956193e+02 |
| 4    | -7.537110e+01 | 5.465929e+02  | -1.108353e+03 |
| 5    | 3.837394e+02  | -3.949819e+02 | -5.279457e+02 |
| 6    | 1.921801e+03  | 4.273436e+03  | -1.167882e+02 |
| 7    | -1.559352e+02 | -7.401888e+03 | -6.242484e+03 |
| 8    | 1.634885e+03  | 4.072289e+03  | 5.244234e+03  |
| 9    | -4.255424e+02 | -1.999611e+01 | 7.297793e+02  |
| 10   | -7.427816e+02 | 9.185592e+02  | -1.058802e+03 |
| 11   | -1.482684e+03 | -1.218149e+02 | 7.724188e+02  |
| 12   | -6.354529e+02 | 4.292025e+03  | -2.246845e+03 |
| 13   | -1.988480e+03 | -2.839942e+03 | 3.795558e+03  |
| 14   | 6.593624e+02  | -3.913704e+02 | 5.526357e+02  |
| 15   | 1.089048e+03  | 1.095076e+03  | 4.320601e+01  |
| 16   | -7.580454e+02 | -7.706671e+02 | -2.179500e+02 |
| 17   | 6.165717e+01  | 2.197070e+02  | 1.901881e+02  |
| 18   | -1.181503e+03 | 6.637277e+02  | 2.402239e+02  |
| 19   | 7.905760e+02  | 1.349472e+03  | -1.508749e+03 |
| 20   | -1.473643e+03 | -6.246434e+02 | -2.537693e+02 |
| 21   | 4.693999e+02  | -4.514724e+02 | 2.703145e+02  |
| 22   | -1.160284e+03 | -5.019690e+02 | -1.026370e+03 |
| 23   | 5.522813e+02  | 1.100297e+02  | 6.636739e+02  |
| 24   | 1.410566e+02  | 3.396125e+02  | -1.475132e+03 |
| 25   | 2.445508e+02  | -7.525898e+02 | -8.693268e+02 |
| 26   | 5.389019e+02  | -1.387006e+02 | 1.566344e+03  |
| 27   | 1.624985e+03  | -2.807232e+02 | -1.850846e+03 |
| 28   | -4.141816e+02 | 6.601399e+02  | -1.030845e+01 |
| 29   | 1.140818e+03  | 7.247917e+02  | 5.667975e+02  |
| 30   | -2.423209e+03 | 2.850386e+02  | 2.600864e+02  |
| 31   | 4.053583e+03  | 2.057251e+02  | -6.753386e+03 |
| 32   | 4.047740e+03  | -5.719416e+03 | 6.796943e+03  |
| 33   | -2.716897e+03 | -8.619677e+03 | 3.165101e+03  |

|    |               |               |               |
|----|---------------|---------------|---------------|
| 34 | -4.389518e+03 | -4.033892e+03 | 4.183217e+03  |
| 35 | -1.243373e+03 | -6.261657e+02 | 1.641375e+03  |
| 36 | -2.478417e+03 | 2.369451e+03  | -3.523515e+03 |
| 37 | 1.693000e+03  | -2.045687e+03 | -4.928592e+02 |
| 38 | 7.203759e+02  | -1.287469e+03 | 5.272626e+03  |
| 39 | -6.961827e+03 | 3.245992e+03  | 4.495480e+02  |
| 40 | 2.193538e+01  | -1.493931e+03 | 9.171980e+02  |
| 41 | 1.335439e+03  | 5.019151e+02  | 9.648030e+01  |
| 42 | 1.656111e+01  | -1.003197e+03 | -4.318246e+02 |
| 43 | -2.843437e+02 | 2.174188e+03  | -7.945562e+02 |
| 44 | 1.649698e+02  | 5.609808e+03  | -4.017317e+03 |
| 45 | -1.205402e+03 | 1.122791e+03  | 2.534470e+02  |
| 46 | 2.195686e+03  | 5.432252e+03  | -7.730881e+02 |
| 47 | -1.480385e+02 | -2.308494e+02 | 8.916929e+00  |
| 48 | 2.390724e+03  | -3.503819e+03 | -6.419706e+02 |
| 49 | 1.007543e+04  | 6.201296e+03  | -2.581434e+03 |
| 50 | -7.303351e+03 | -4.732679e+03 | -4.323705e+03 |
| 51 | -9.996798e+01 | -2.677322e+02 | 3.647873e+02  |
| 52 | 8.514625e+03  | 4.029395e+02  | -5.544414e+03 |
| 53 | -5.776837e+03 | 5.533492e+03  | -8.731095e+02 |
| 54 | 2.961439e+03  | 3.671050e+02  | -5.177385e+03 |
| 55 | 1.144967e+03  | -3.666132e+01 | 1.670536e+02  |
| 56 | 1.330435e+03  | -1.047225e+03 | 1.100061e+03  |
| 57 | 1.101907e+03  | -3.393376e+03 | 3.569802e+03  |
| 58 | -1.010010e+04 | -5.421882e+03 | 4.157448e+03  |
| 59 | 5.224521e+02  | -9.896917e+02 | -1.674346e+02 |
| 60 | -1.512851e+03 | 4.459438e+02  | 6.439285e+02  |
| 61 | -9.328235e+02 | 5.481380e+03  | 4.137131e+03  |
| 62 | -9.851707e+03 | 9.449621e+02  | 4.938299e+03  |
| 63 | -2.361387e+02 | -7.568497e+02 | 2.068025e+03  |
| 64 | -4.914834e+02 | 4.712296e+02  | 1.606357e+03  |
| 65 | 5.498575e+03  | -6.175161e+02 | -9.090953e+03 |
| 66 | 3.328673e+03  | 5.073856e+02  | -8.807273e+03 |
| 67 | -3.393799e+03 | -4.890728e+03 | 2.920236e+03  |

trajectory 2

| atom | VX | VY | VZ |
|------|----|----|----|
|------|----|----|----|

trajectory 2

| atom | VX            | VY           | VZ            |
|------|---------------|--------------|---------------|
| 1    | 4.236201e+02  | 3.308717e+02 | -3.384608e+02 |
| 2    | -3.682707e+02 | 8.745065e+02 | 2.085724e+03  |

|    |               |               |               |
|----|---------------|---------------|---------------|
| 3  | 3.927412e+02  | -1.006890e+03 | 6.794811e+02  |
| 4  | -1.036590e+03 | -1.498613e+02 | -9.853341e+02 |
| 5  | 3.641946e+02  | 3.449313e+02  | -1.770130e+02 |
| 6  | -9.257047e+03 | -4.158817e+03 | 3.729901e+03  |
| 7  | 2.522391e+03  | 3.516193e+03  | 1.818396e+03  |
| 8  | 5.732761e+03  | -6.117542e+03 | -8.849842e+02 |
| 9  | 2.639551e+02  | -4.809358e+02 | -1.119030e+03 |
| 10 | 1.235252e+03  | -1.303716e+03 | -7.098041e+02 |
| 11 | -1.693228e+01 | 9.739593e+02  | -8.809337e+02 |
| 12 | -6.539719e+03 | 1.215958e+03  | 5.779210e+03  |
| 13 | 1.393531e+03  | -4.922048e+03 | 6.963553e+03  |
| 14 | -4.761725e+02 | 1.166419e+02  | 3.276194e+02  |
| 15 | -2.716263e+01 | -3.720383e+02 | -1.276741e+03 |
| 16 | 3.952116e+02  | -1.370263e+03 | 8.059210e+01  |
| 17 | -1.393732e+02 | 1.359722e+02  | -8.410451e+01 |
| 18 | 2.965439e+02  | 1.088002e+03  | 6.416553e+00  |
| 19 | -6.314669e+02 | -1.054986e+03 | 1.728154e+03  |
| 20 | -6.924050e+02 | -4.405434e+02 | 2.534792e+02  |
| 21 | -3.571053e+02 | 2.176952e+02  | 9.795669e+02  |
| 22 | 2.310685e+03  | -2.527593e+02 | 8.835671e+02  |
| 23 | -1.025973e+03 | 4.934447e+02  | 2.844322e+02  |
| 24 | -7.449656e+02 | -1.611438e+02 | 8.572964e+02  |
| 25 | 5.077939e+02  | 1.409685e+03  | -2.971440e+02 |
| 26 | 1.486886e+02  | -6.391729e+02 | -8.808780e+02 |
| 27 | -2.585217e+03 | -1.327447e+03 | 2.385060e+02  |
| 28 | 1.124352e+03  | -2.894090e+02 | 1.024380e+03  |
| 29 | -9.078553e+02 | 1.550491e+02  | 2.843304e+02  |
| 30 | -2.264819e+02 | -1.184532e+03 | 1.417346e+02  |
| 31 | 4.780154e+03  | 4.455467e+03  | -2.414020e+03 |
| 32 | 2.758525e+03  | 7.686302e+03  | -4.656189e+03 |
| 33 | 3.730782e+03  | 2.383230e+03  | -2.469330e+03 |
| 34 | 2.577726e+03  | -3.692117e+03 | -3.406699e+03 |
| 35 | -5.014658e+02 | 1.072169e+03  | -2.634797e+02 |
| 36 | -2.887221e+03 | -3.135334e+03 | -3.054820e+03 |
| 37 | 6.062924e+02  | 1.075442e+03  | 7.670953e+01  |
| 38 | -8.129740e+02 | -3.565701e+02 | -3.345379e+03 |
| 39 | 8.877521e+02  | -7.234890e+03 | -4.795328e+03 |
| 40 | 1.744015e+03  | -1.295025e+03 | 1.356092e+03  |
| 41 | -2.695179e+03 | 1.022809e+03  | -5.958678e+02 |
| 42 | 6.257222e+02  | 6.487646e+02  | -3.332899e+02 |
| 43 | 6.768113e+02  | -1.770965e+03 | -7.644781e+02 |
| 44 | 3.139948e+03  | 2.558311e+03  | -2.471312e+03 |
| 45 | -4.493917e+02 | 6.554891e+01  | -1.687286e+03 |
| 46 | -6.936123e+02 | 2.855387e+02  | 3.967076e+03  |
| 47 | -9.580163e+00 | 5.426002e+02  | 1.910746e+03  |
| 48 | 2.443608e+03  | 1.545692e+03  | 2.331439e+03  |

|    |               |               |               |
|----|---------------|---------------|---------------|
| 49 | 1.007382e+04  | 2.992693e+03  | -8.239381e+03 |
| 50 | 5.790044e+02  | -6.372647e+03 | 4.793806e+02  |
| 51 | -1.081715e+03 | 8.319782e+02  | 7.524903e+01  |
| 52 | -1.042970e+03 | -5.846001e+03 | 2.278602e+03  |
| 53 | -6.971090e+03 | 4.213786e+03  | 2.983142e+03  |
| 54 | 3.476676e+03  | -5.659578e+03 | 6.699774e+03  |
| 55 | 2.878669e+02  | -7.176772e+02 | -1.554630e+03 |
| 56 | 1.145485e+03  | 5.639275e+02  | 2.463917e+03  |
| 57 | 4.301491e+03  | 6.991119e+03  | 8.053307e+03  |
| 58 | 5.881848e+01  | -3.460494e+03 | -5.556954e+03 |
| 59 | 8.762247e+02  | -6.144942e+02 | 1.358345e+03  |
| 60 | 4.193589e+03  | 2.420499e+03  | 1.448101e+03  |
| 61 | -5.841413e+03 | 4.717050e+03  | -4.887323e+03 |
| 62 | 4.262678e+03  | -2.152590e+02 | -8.657714e+02 |
| 63 | -1.826482e+03 | 4.047058e+02  | 9.125144e+02  |
| 64 | 4.507299e+02  | -4.914469e+03 | -2.511268e+03 |
| 65 | -1.479355e+02 | 1.425085e+03  | -3.601317e+03 |
| 66 | 3.274019e+03  | 6.016326e+03  | -3.353658e+03 |
| 67 | 1.505244e+03  | -2.482685e+03 | 3.584437e+03  |

trajectory 3

| atom | VX | VY | VZ |
|------|----|----|----|
|------|----|----|----|

trajectory 3

| atom | VX            | VY            | VZ            |
|------|---------------|---------------|---------------|
| 1    | 1.842465e+02  | 1.065456e+02  | 1.688860e+02  |
| 2    | -3.111414e+02 | -2.957536e+02 | 3.538710e+02  |
| 3    | -3.800754e+01 | 1.066384e+03  | 1.795011e+03  |
| 4    | 6.214574e+02  | -1.502077e+02 | 2.106747e+02  |
| 5    | -7.451881e+02 | -1.706238e+03 | -5.443293e+02 |
| 6    | 4.438367e+02  | -5.087864e+03 | 2.733565e+03  |
| 7    | 3.243078e+02  | 7.411783e+03  | 4.310180e+03  |
| 8    | -2.643417e+03 | -7.702889e+03 | -5.482424e+03 |
| 9    | -4.127733e+02 | -9.431339e+01 | -1.227162e+02 |
| 10   | -1.637428e+02 | -1.020372e+03 | 4.208820e+01  |
| 11   | -6.622261e+02 | 8.098961e+02  | -2.749893e+02 |
| 12   | -3.627586e+03 | -5.750955e+03 | 3.733955e+02  |
| 13   | -6.495783e+03 | 2.885586e+01  | 5.691585e+03  |
| 14   | -4.847335e+02 | 1.630755e+01  | -2.380731e+02 |
| 15   | -7.115315e+02 | -4.030579e+02 | -2.154878e+03 |
| 16   | 7.902579e+02  | 1.162648e+03  | 4.676872e+02  |
| 17   | -2.972849e+01 | 1.089796e+02  | 9.623481e+01  |

|    |               |               |               |
|----|---------------|---------------|---------------|
| 18 | 1.886092e+02  | -3.565391e+02 | -5.990643e+02 |
| 19 | -6.002603e+02 | 4.547403e+02  | 2.144946e+02  |
| 20 | 1.638803e+03  | -6.361480e+02 | 1.113813e+03  |
| 21 | 6.621442e+02  | -3.667464e+02 | 2.732920e+02  |
| 22 | -1.352700e+03 | 8.144739e+00  | 4.338326e+02  |
| 23 | 3.257468e+02  | 9.740333e+02  | -7.630902e+02 |
| 24 | -9.240825e+02 | -5.135683e+02 | -3.798485e+02 |
| 25 | 2.764108e+02  | 1.565748e+02  | 9.877153e+02  |
| 26 | 4.670099e+02  | -6.892639e+02 | -7.074030e+02 |
| 27 | 1.740180e+03  | 1.016361e+03  | -1.050640e+03 |
| 28 | -1.440339e+02 | 2.048624e+02  | 1.800548e+03  |
| 29 | -2.421828e+03 | 2.212191e+03  | -8.451525e+02 |
| 30 | 2.334886e+03  | 1.824045e+01  | 6.325028e+02  |
| 31 | -3.341303e+03 | -4.991353e+02 | 1.421457e+03  |
| 32 | 4.196984e+02  | 7.654532e+02  | -2.779526e+03 |
| 33 | -1.953889e+03 | -2.332792e+03 | -7.016285e+02 |
| 34 | -7.194294e+03 | -5.437678e+03 | 4.022978e+03  |
| 35 | -9.935198e+02 | -1.788332e+03 | 9.810739e+02  |
| 36 | 1.431132e+03  | 5.275314e+03  | -6.143816e+03 |
| 37 | 8.499523e+02  | -7.701424e+02 | 1.149634e+02  |
| 38 | -5.758760e+02 | 2.280040e+03  | 5.940467e+03  |
| 39 | -5.262924e+03 | 5.792070e+03  | 2.085910e+03  |
| 40 | 5.978132e+02  | 2.597996e+02  | -7.830516e+02 |
| 41 | -8.326545e+02 | 3.957656e+01  | -1.793849e+03 |
| 42 | 1.357413e+03  | -1.380344e+03 | -7.986749e+01 |
| 43 | 1.257720e+03  | 7.489086e+02  | -4.512532e+02 |
| 44 | 6.329786e+03  | 3.995549e+03  | 9.533606e+02  |
| 45 | 1.140632e+02  | -5.392753e+02 | 4.945461e+02  |
| 46 | 1.094778e+03  | -6.048729e+01 | -2.920692e+03 |
| 47 | -7.745981e+02 | -1.417624e+02 | -5.052512e+01 |
| 48 | -4.628995e+03 | -5.796592e+03 | 1.871928e+03  |
| 49 | -1.206102e+04 | -5.015329e+03 | 2.890009e+03  |
| 50 | -4.516644e+03 | 4.612771e+03  | -3.708744e+03 |
| 51 | -1.496246e+03 | 4.581512e+02  | 8.410773e+02  |
| 52 | 3.868178e+03  | -2.958118e+03 | 3.033608e+03  |
| 53 | 9.267661e+03  | 2.145734e+03  | 4.873163e+03  |
| 54 | 1.721741e+03  | 3.389509e+03  | 3.900277e+03  |
| 55 | -7.327559e+02 | 3.299949e+02  | 3.723042e+01  |
| 56 | -1.051551e+03 | 8.650701e+03  | -1.759254e+03 |
| 57 | 4.019038e+03  | -5.813133e+03 | -7.647198e+03 |
| 58 | 1.120416e+03  | 3.089979e+03  | 2.456401e+03  |
| 59 | 8.742139e+02  | 1.683085e+03  | -9.354122e+02 |
| 60 | -6.961355e+03 | -6.212119e+03 | -2.163481e+03 |
| 61 | 4.561474e+03  | -7.093152e+03 | -5.512575e+03 |
| 62 | 3.534991e+03  | -7.262433e+02 | -2.457439e+03 |
| 63 | -1.759837e+02 | -4.055503e+02 | -8.736703e+02 |

|    |               |               |               |
|----|---------------|---------------|---------------|
| 64 | 2.753637e+03  | -7.382087e+02 | -3.301918e+03 |
| 65 | -1.795103e+03 | 3.513998e+03  | -4.928562e+03 |
| 66 | -5.530071e+03 | -9.765132e+03 | -1.511730e+03 |
| 67 | -1.819143e+03 | -3.637913e+03 | 2.423349e+03  |

trajectory 4

| atom | VX | VY | VZ |
|------|----|----|----|
|------|----|----|----|

trajectory 4

| atom | VX            | VY            | VZ            |
|------|---------------|---------------|---------------|
| 1    | -3.295006e+02 | -1.756850e+02 | 2.923625e+02  |
| 2    | 5.778194e+02  | -1.771800e+02 | 5.416175e+02  |
| 3    | 3.106491e+02  | 2.172498e+03  | -8.934923e+02 |
| 4    | 7.023089e+02  | -1.587018e+02 | -5.724177e+02 |
| 5    | 5.372447e+02  | 1.182782e+03  | 1.127035e+03  |
| 6    | -7.818893e+03 | -5.881901e+03 | -1.676871e+03 |
| 7    | 2.191950e+03  | -6.892154e+03 | -3.436410e+03 |
| 8    | 1.674027e+03  | -4.204791e+03 | -2.799146e+03 |
| 9    | 5.064595e+02  | 1.423229e+02  | 5.889631e+02  |
| 10   | 2.427609e+03  | -2.446105e+02 | -1.136467e+03 |
| 11   | -2.428377e+03 | 5.957077e+02  | 8.423719e+01  |
| 12   | 2.882029e+03  | 5.868536e+03  | 1.451278e+03  |
| 13   | -1.897540e+03 | -6.484625e+03 | 4.383951e+02  |
| 14   | -8.825300e+02 | -2.494183e+02 | -4.527986e+01 |
| 15   | 2.075379e+03  | -4.675268e+00 | -2.545221e+02 |
| 16   | 4.586426e+02  | -9.163487e+02 | -8.581798e+02 |
| 17   | 3.675349e+02  | -4.554864e+01 | 1.126019e+02  |
| 18   | -4.729679e+02 | -5.118385e+01 | -6.234125e+02 |
| 19   | -9.253095e+02 | -1.049395e+03 | -7.770525e+02 |
| 20   | -6.882391e+02 | 1.328125e+02  | 6.184401e+02  |
| 21   | 5.135939e+02  | 3.115184e+02  | 9.964579e+02  |
| 22   | 2.700265e+02  | 2.653130e+03  | -1.020698e+03 |
| 23   | 5.092222e+02  | -7.650935e+01 | 1.609507e+02  |
| 24   | -5.463603e+02 | -5.979806e+02 | 7.690185e+02  |
| 25   | -9.810490e+02 | 7.219193e+02  | -1.282377e+02 |
| 26   | 6.864379e+02  | 2.622294e+02  | -1.183429e+03 |
| 27   | -4.932820e+02 | -1.136831e+02 | -5.825382e+02 |
| 28   | 1.647213e+02  | -1.199724e+03 | 1.488237e+03  |
| 29   | -3.627346e-01 | 4.730644e+02  | -3.633448e+01 |
| 30   | -8.700291e+02 | 8.243147e+02  | -3.636461e+02 |
| 31   | 5.499358e+03  | 4.952931e+03  | -3.258933e+03 |
| 32   | -1.296583e+03 | 6.184078e+03  | -1.211124e+03 |



|    |               |               |               |
|----|---------------|---------------|---------------|
| 33 | -5.598945e+03 | 2.201387e+03  | -5.239315e+02 |
| 34 | -5.764285e+03 | 3.376586e+03  | -3.538335e+02 |
| 35 | 1.256554e+03  | -4.818490e+02 | -4.784174e+02 |
| 36 | 1.009280e+02  | -1.090241e+03 | 3.653306e+03  |
| 37 | -3.024920e+02 | 5.696128e+02  | -2.018572e+03 |
| 38 | -7.598802e+02 | 7.126966e+03  | 1.477764e+03  |
| 39 | -8.472998e+03 | 1.588336e+03  | 3.230333e+03  |
| 40 | 8.298056e+02  | -1.380533e+03 | -6.172535e+02 |
| 41 | -1.723658e+03 | 1.052994e+03  | 1.920410e+03  |
| 42 | 4.592575e+02  | 2.592428e+02  | -1.181882e+03 |
| 43 | 1.069809e+03  | 3.332708e+02  | -1.712736e+02 |
| 44 | 6.704568e+03  | -7.135478e+03 | -6.797891e+03 |
| 45 | -1.015973e+03 | -7.198526e+02 | 8.189529e+02  |
| 46 | 1.035088e+03  | -2.327536e+03 | -4.315432e+02 |
| 47 | -2.174544e+01 | 2.639616e+02  | 5.757968e+02  |
| 48 | 1.487329e+03  | 8.374217e+02  | 3.724098e+02  |
| 49 | 7.011022e+03  | 6.051215e+03  | -6.320405e+03 |
| 50 | 5.324308e+02  | -5.184795e+03 | 1.814408e+03  |
| 51 | -1.877161e+03 | 1.389427e+02  | -1.529932e+02 |
| 52 | -1.408443e+02 | -4.889235e+03 | -3.012638e+03 |
| 53 | 5.942296e+03  | 2.869580e+03  | 8.338556e+03  |
| 54 | 2.269244e+03  | 1.040814e+03  | -2.478563e+03 |
| 55 | 1.033159e+03  | -2.105431e+02 | -2.728404e+02 |
| 56 | 1.445371e+03  | 4.278561e+03  | 1.966638e+03  |
| 57 | 4.706464e+03  | -1.112155e+02 | 2.733610e+03  |
| 58 | -7.246761e+03 | -1.054650e+04 | 1.030789e+03  |
| 59 | -2.149325e+01 | -5.601982e+02 | 1.479589e+03  |
| 60 | 2.864573e+02  | 3.664258e+03  | -2.932571e+03 |
| 61 | -3.293222e+03 | 4.604644e+03  | -6.228734e+03 |
| 62 | 2.179213e+03  | -5.499641e+03 | -5.106218e+03 |
| 63 | -1.606482e+03 | -6.079925e+02 | 1.270339e+03  |
| 64 | -7.892907e+02 | -6.864686e+03 | -1.373342e+03 |
| 65 | -3.130617e+03 | -6.027515e+01 | -6.009644e+03 |
| 66 | 4.541817e+03  | 5.393111e+03  | -5.131334e+03 |
| 67 | -5.665758e+03 | -4.695837e+03 | 2.872214e+03  |

trajectory 5

| atom | VX | VY | VZ |
|------|----|----|----|
|------|----|----|----|

trajectory 5

| atom | VX            | VY            | VZ            |
|------|---------------|---------------|---------------|
| 1    | -1.807212e+02 | -3.855378e+02 | -6.528017e+01 |

|    |               |               |               |
|----|---------------|---------------|---------------|
| 2  | 1.171644e+03  | -4.781149e+01 | 2.061778e+02  |
| 3  | 4.476733e+02  | 3.005478e+02  | -1.612530e+03 |
| 4  | -1.019097e+03 | -6.198007e+02 | 7.349906e+01  |
| 5  | 1.382152e+03  | 1.524085e+03  | -4.069884e+02 |
| 6  | -1.630156e+03 | -9.668657e+02 | -7.461586e+03 |
| 7  | -5.509556e+03 | -2.268647e+02 | -6.643216e+03 |
| 8  | -6.919284e+03 | -1.637132e+02 | -6.315081e+03 |
| 9  | 1.499604e+02  | 1.085690e+03  | 1.367604e+02  |
| 10 | -2.057848e+02 | -4.048625e+02 | 7.133254e+02  |
| 11 | -1.876598e+03 | -1.718627e+02 | 6.339672e+02  |
| 12 | 5.331895e+03  | -1.050029e+03 | -2.920574e+03 |
| 13 | -4.750941e+03 | 6.076559e+03  | -7.430293e+03 |
| 14 | 2.095500e+03  | -8.154838e+02 | -1.756241e+02 |
| 15 | -2.114603e+03 | 7.492093e+02  | 2.576269e+02  |
| 16 | -1.221360e+03 | 5.357915e+02  | 6.639512e+02  |
| 17 | 3.256977e+02  | 1.027712e+02  | 2.375008e+02  |
| 18 | 1.340605e+03  | -3.104976e+02 | 3.734184e+02  |
| 19 | -1.258106e+03 | -1.173933e+03 | 3.013804e+02  |
| 20 | -2.646811e+02 | 3.455922e+02  | -3.535835e+02 |
| 21 | -8.311457e+02 | -1.179872e+03 | -1.806437e+02 |
| 22 | -6.523552e+02 | 9.439779e+02  | 4.877575e+01  |
| 23 | 1.157101e+03  | 1.423085e+03  | -2.190773e+02 |
| 24 | 5.467229e+02  | -4.967063e+02 | 3.561170e+02  |
| 25 | 1.159567e+03  | 9.742903e+02  | -1.266410e+01 |
| 26 | -1.411551e+02 | 1.054984e+03  | -2.427489e+02 |
| 27 | -6.369912e+02 | -3.338762e+02 | 5.054624e+02  |
| 28 | 6.068191e+02  | -1.292537e+03 | -1.746913e+02 |
| 29 | -1.641290e+03 | 2.411796e+02  | 3.717815e+02  |
| 30 | -7.490854e+02 | 6.162889e+02  | 1.531661e+02  |
| 31 | 6.872824e+03  | 5.624993e+03  | -3.325303e+03 |
| 32 | -3.738388e+03 | 5.629803e+03  | -3.874710e+03 |
| 33 | 1.955811e+03  | 1.791720e+03  | -3.529415e+03 |
| 34 | 3.222447e+03  | -8.342598e+03 | 1.713971e+03  |
| 35 | 4.095781e+02  | 1.630446e+03  | 6.036930e+01  |
| 36 | -1.599894e+03 | -1.322335e+03 | 2.880001e+02  |
| 37 | 1.540096e+03  | -6.445248e+02 | -1.792928e+02 |
| 38 | 3.091751e+03  | -5.526261e+03 | 5.110167e+03  |
| 39 | 2.628681e+02  | 4.472162e+03  | 6.762467e+03  |
| 40 | 1.351751e+03  | 1.345764e+03  | 3.059720e+02  |
| 41 | -1.821836e+03 | -7.177502e+02 | 4.285429e+02  |
| 42 | -1.924073e+02 | 9.214520e+02  | -5.135729e+02 |
| 43 | -4.400152e+02 | -1.689694e+03 | -3.929551e+02 |
| 44 | 6.465047e+02  | -6.201549e+03 | 2.531197e+03  |
| 45 | 9.549732e+02  | -8.634441e+02 | -1.427094e+03 |
| 46 | 6.619193e+03  | -2.573501e+03 | 5.952701e+02  |
| 47 | -4.491072e+02 | 1.354959e+03  | -6.338755e+02 |

|    |               |               |               |
|----|---------------|---------------|---------------|
| 48 | 1.308889e+03  | 2.840127e+03  | -4.429108e+03 |
| 49 | -4.137874e+03 | -1.102943e+03 | 1.057739e+04  |
| 50 | 1.616134e+03  | -4.911972e+03 | 3.883693e+03  |
| 51 | 4.682023e+01  | -4.470534e+02 | 7.680966e+02  |
| 52 | -9.286824e+03 | 1.766706e+03  | 6.681571e+03  |
| 53 | 2.496409e+03  | 9.548473e+02  | 5.517657e+03  |
| 54 | -2.663436e+03 | -2.426771e+03 | 3.297329e+03  |
| 55 | -7.197148e+01 | 6.050745e+02  | 5.851667e+02  |
| 56 | -5.467704e+02 | 1.208392e+03  | 2.788612e+02  |
| 57 | 2.516502e+03  | 5.427831e+02  | 3.078095e+03  |
| 58 | -5.563844e+03 | -7.042701e+03 | -8.304543e+03 |
| 59 | 6.143710e+02  | -7.786200e+02 | -1.461929e+03 |
| 60 | -1.164583e+03 | 6.570948e+02  | 1.579073e+03  |
| 61 | 7.344759e+02  | 6.981205e+02  | -6.137391e+02 |
| 62 | -9.408303e+03 | 3.630466e+03  | 3.603631e+03  |
| 63 | 6.670850e+02  | -3.751891e+01 | -1.588000e+03 |
| 64 | -3.445607e+03 | -1.539512e+03 | -7.588221e+02 |
| 65 | 5.475706e+02  | -9.496839e+03 | 9.373488e+03  |
| 66 | -2.667119e+03 | 8.677142e+02  | 5.111304e+02  |
| 67 | 3.194300e+03  | -2.240782e+03 | 2.260976e+03  |

trajectory 6

| atom | VX | VY | VZ |
|------|----|----|----|
|------|----|----|----|

trajectory 6

| atom | VX            | VY            | VZ            |
|------|---------------|---------------|---------------|
| 1    | 1.399709e+02  | 1.665528e+02  | 1.266495e+02  |
| 2    | -1.785993e+02 | -1.157733e+02 | 1.491088e+03  |
| 3    | 8.108222e+02  | -3.009038e+02 | -5.139206e+02 |
| 4    | -1.040461e+03 | 2.196619e+02  | -4.650154e+02 |
| 5    | -2.324003e+02 | 1.946338e+01  | -6.381584e+02 |
| 6    | 5.959426e+03  | 3.492460e+03  | 3.541901e+03  |
| 7    | 5.033862e+03  | -3.110216e+03 | -6.540360e+03 |
| 8    | 1.636411e+03  | 3.691483e+03  | 5.618858e+03  |
| 9    | -2.193102e+02 | 1.726223e+03  | 1.240524e+03  |
| 10   | 4.170289e+02  | -2.156360e+03 | -4.082892e+02 |
| 11   | -1.289598e+02 | 1.894284e+03  | -6.727459e+02 |
| 12   | -2.689290e+03 | 1.471442e+03  | 5.675367e+03  |
| 13   | -1.378479e+03 | -7.129913e+03 | 4.835873e+03  |
| 14   | 1.241030e+03  | 7.033436e+02  | 3.918520e+02  |
| 15   | -1.748014e+03 | 1.063738e+02  | -8.274999e+02 |
| 16   | 7.314514e+02  | -1.542810e+03 | -9.667975e+01 |

|    |               |               |               |
|----|---------------|---------------|---------------|
| 17 | -2.172674e+02 | -4.389353e+01 | -1.809992e+02 |
| 18 | -7.568586e+02 | 7.039043e+02  | -3.037247e+02 |
| 19 | 5.265775e+00  | 4.244216e+02  | -8.751194e+02 |
| 20 | -2.899950e+02 | 5.323507e+02  | 2.191124e+02  |
| 21 | -5.746517e+02 | -1.381030e+03 | 2.536914e+02  |
| 22 | 1.225447e+03  | 1.486356e+03  | -1.978298e+02 |
| 23 | -4.781463e+02 | -1.083861e+03 | 1.144961e+03  |
| 24 | -7.761438e+02 | -6.694562e+02 | 7.036721e+02  |
| 25 | 3.665135e+02  | -8.489017e+02 | -1.004157e+03 |
| 26 | 4.396054e+02  | 7.315244e+01  | -5.616269e+02 |
| 27 | 1.735564e+03  | -8.395106e+02 | 1.373980e+02  |
| 28 | 1.050681e+01  | 4.408978e+02  | -1.314207e+03 |
| 29 | 9.076419e+02  | -5.081944e+02 | -6.423020e+02 |
| 30 | -1.477040e+03 | 6.345450e+02  | -4.800624e+02 |
| 31 | 4.154595e+03  | 3.002361e+03  | -3.147073e+03 |
| 32 | -3.079843e+03 | -8.764394e+03 | 4.192729e+03  |
| 33 | 2.476020e+03  | 2.516253e+03  | 1.802668e+03  |
| 34 | -2.956785e+03 | 4.875238e+03  | -3.429668e+03 |
| 35 | -5.439866e+02 | -7.747179e+02 | 1.057274e+03  |
| 36 | 1.325846e+03  | 1.502151e+02  | -1.631141e+03 |
| 37 | -7.922443e+02 | -1.427142e+03 | -7.117217e+02 |
| 38 | -5.285601e+03 | -3.926821e+03 | -6.704700e+03 |
| 39 | 3.105021e+03  | 8.676797e+03  | -1.198118e+03 |
| 40 | -7.613913e+02 | 1.238924e+03  | -1.340899e+03 |
| 41 | -3.023951e+02 | -6.313314e+02 | 2.168785e+03  |
| 42 | 3.360204e+02  | 2.092474e+03  | -7.312370e+02 |
| 43 | 8.231837e+02  | -1.618838e+03 | 6.973241e+02  |
| 44 | 6.522817e+02  | 8.710117e+03  | -3.154064e+03 |
| 45 | 3.772576e+02  | 1.560223e+02  | -3.714782e+02 |
| 46 | 4.193317e+02  | -2.067220e+03 | 2.058592e+03  |
| 47 | 5.322115e+02  | 1.593848e+02  | -8.379113e+02 |
| 48 | 2.971322e+03  | 2.352187e+02  | -9.060117e+02 |
| 49 | -6.279770e+03 | -6.397250e+03 | 2.798021e+03  |
| 50 | 2.959063e+03  | -2.032548e+03 | 2.814538e+03  |
| 51 | -1.589490e+03 | 4.947176e+02  | 1.983072e+03  |
| 52 | 8.167565e+03  | 5.401173e+03  | -1.319537e+03 |
| 53 | -5.563500e+03 | 4.778990e+02  | 1.833014e+03  |
| 54 | 5.346833e+03  | 4.961356e+03  | 3.724030e+02  |
| 55 | -3.790177e+02 | -1.464392e+03 | 1.751973e+03  |
| 56 | 2.632853e+03  | 2.278775e+03  | -3.756610e+03 |
| 57 | -6.282811e+02 | 7.929487e+03  | 7.216583e+02  |
| 58 | 7.857117e+03  | 9.411599e+02  | -5.812284e+03 |
| 59 | 1.638686e+02  | 5.933361e+02  | 1.044117e+03  |
| 60 | 3.127136e+03  | -1.442840e+03 | -5.934262e+03 |
| 61 | 1.075823e+03  | -2.316165e+03 | -9.789346e+02 |
| 62 | -1.106403e+04 | 2.671733e+03  | -2.386688e+03 |

|    |               |               |               |
|----|---------------|---------------|---------------|
| 63 | 1.621316e+03  | -3.960815e+02 | -6.354429e+02 |
| 64 | -1.539663e+03 | -1.142961e+03 | -2.591754e+03 |
| 65 | 5.207848e+03  | -1.123974e+03 | -4.661653e+03 |
| 66 | -9.401861e+03 | -4.583978e+03 | 2.366958e+03  |
| 67 | 6.747372e+03  | -2.643121e+03 | 3.306830e+03  |

trajectory 7

| atom | VX | VY | VZ |
|------|----|----|----|
|------|----|----|----|

trajectory 7

| atom | VX            | VY            | VZ            |
|------|---------------|---------------|---------------|
| 1    | -2.819926e+02 | 1.258905e+02  | 3.308859e+02  |
| 2    | 3.578645e+02  | 1.566077e+03  | -5.126892e+02 |
| 3    | -1.055466e+03 | -3.692582e+02 | 1.363018e+03  |
| 4    | 7.390155e+02  | -9.653126e+02 | -5.923538e+02 |
| 5    | 4.797369e+02  | -2.449137e+02 | 5.934061e+02  |
| 6    | 2.040792e+03  | 1.524943e+03  | 7.995907e+02  |
| 7    | 1.953959e+02  | -1.380702e+03 | -2.454477e+03 |
| 8    | -3.172493e+03 | -1.522720e+04 | -3.213603e+03 |
| 9    | 2.265585e+02  | 4.345665e+01  | -2.847781e+02 |
| 10   | 1.089570e+03  | -2.031608e+03 | 2.309349e+03  |
| 11   | 4.484923e+02  | -2.060987e+02 | -1.042702e+03 |
| 12   | 2.333261e+03  | 2.562403e+03  | -4.321442e+03 |
| 13   | 2.538441e+02  | 6.898449e+03  | -1.424497e+03 |
| 14   | 7.404542e+02  | -8.338015e+01 | 2.196838e+01  |
| 15   | -9.572165e+02 | 2.040545e+03  | -1.629971e+03 |
| 16   | -6.243644e+02 | 9.562720e+01  | 3.384765e+02  |
| 17   | 2.441833e+02  | -3.045227e+01 | 2.004751e+02  |
| 18   | 1.360527e+03  | 2.075810e+02  | -7.305269e+02 |
| 19   | -5.922293e+02 | -1.965469e+03 | 1.398224e+03  |
| 20   | 3.262363e+02  | 1.161127e+03  | -1.758771e+03 |
| 21   | 6.541499e+02  | -1.648315e+02 | -9.307187e+02 |
| 22   | 8.813677e+01  | 1.220456e+03  | -4.900901e+02 |
| 23   | 7.094265e+02  | 3.965098e+02  | -1.153954e+03 |
| 24   | -6.516096e+01 | 3.226633e+01  | -1.977326e+02 |
| 25   | -5.658352e+02 | 4.588288e+02  | 2.173325e+03  |
| 26   | 5.610354e+02  | 3.994400e+02  | 2.537566e+01  |
| 27   | 3.292850e+02  | -2.533937e+03 | 8.757955e+02  |
| 28   | -3.352550e+02 | 4.463237e+02  | 2.895881e+02  |
| 29   | 1.052508e+03  | 3.742961e+02  | -1.037085e+03 |
| 30   | -5.183139e+02 | 1.086711e+03  | 5.444220e+02  |
| 31   | 1.352971e+03  | 2.539501e+03  | -9.749784e+03 |

|    |               |               |               |
|----|---------------|---------------|---------------|
| 32 | -3.995704e+03 | -4.013423e+03 | 2.283251e+03  |
| 33 | -2.444825e+03 | 1.166308e+03  | 1.655952e+03  |
| 34 | -3.958227e+03 | 3.888061e+03  | -8.659971e+01 |
| 35 | 9.980809e+02  | -2.290906e+02 | -7.244402e+02 |
| 36 | -4.500717e+03 | -5.954096e+03 | 2.819431e+03  |
| 37 | -1.163680e+03 | 3.179933e+02  | 8.897445e+02  |
| 38 | 4.822692e+02  | 6.581270e+02  | -6.313213e+03 |
| 39 | 3.833488e+03  | -4.437898e+03 | -3.215736e+03 |
| 40 | 4.543775e+02  | -3.856098e+00 | 4.307575e+02  |
| 41 | 4.360987e+02  | -9.730205e+02 | -2.996852e+02 |
| 42 | 9.308066e+01  | 8.226651e+02  | -7.825801e+01 |
| 43 | -1.424270e+03 | -1.230469e+03 | -1.306511e+03 |
| 44 | 3.722087e+03  | 4.577282e+03  | -2.438541e+03 |
| 45 | -4.495481e+02 | 7.970471e+02  | -7.626121e+02 |
| 46 | -2.691239e+03 | 2.443882e+03  | 7.350691e+02  |
| 47 | -1.547394e+02 | 1.783748e+03  | 9.385156e+02  |
| 48 | -3.034676e+03 | -4.648929e+03 | 4.285963e+03  |
| 49 | -9.526718e+03 | -3.571941e+03 | 2.790925e+03  |
| 50 | -8.138439e+03 | -4.595196e+03 | 2.392574e+03  |
| 51 | -2.455083e+02 | -9.117105e+02 | 7.069780e+02  |
| 52 | -3.018583e+03 | -5.359146e+02 | -2.175017e+03 |
| 53 | -6.396867e+03 | -4.161130e+02 | -1.001147e+04 |
| 54 | 3.461689e+02  | -1.120873e+03 | 4.212670e+02  |
| 55 | 1.393882e+02  | -1.125993e+02 | -1.407783e+03 |
| 56 | -7.215653e+03 | -8.066574e+03 | 3.738346e+03  |
| 57 | 3.916402e+02  | 1.801584e+03  | -1.362041e+03 |
| 58 | 2.631272e+03  | 3.862060e+03  | 8.911768e+01  |
| 59 | -1.014854e+02 | -1.742203e+02 | 1.362226e+03  |
| 60 | -3.672286e+02 | -7.019209e+03 | 1.981836e+03  |
| 61 | 2.384694e+03  | 2.777586e+03  | -7.673013e+03 |
| 62 | -4.603540e+03 | 3.421155e+02  | -2.602757e+03 |
| 63 | 1.000509e+03  | -1.005748e+03 | 8.386313e+02  |
| 64 | -5.381564e+03 | 4.065093e+03  | 3.278365e+03  |
| 65 | -4.125865e+03 | -2.017444e+03 | 3.733689e+03  |
| 66 | -5.248762e+03 | 1.798340e+03  | -7.641548e+03 |
| 67 | -4.666548e+03 | 7.367518e+03  | -1.612880e+03 |

trajectory 8  
atom VX VY VZ

trajectory 8  
atom VX VY VZ

|    |               |               |               |
|----|---------------|---------------|---------------|
| 1  | 2.680776e+02  | 5.143915e+00  | 1.392996e+02  |
| 2  | 5.485177e+01  | -4.206118e+02 | 4.376773e+02  |
| 3  | 2.605949e+02  | 2.877694e+02  | 6.309817e+02  |
| 4  | 3.822998e+02  | -7.787319e+02 | 5.612199e+02  |
| 5  | -6.010694e+02 | 1.324910e+03  | 1.013357e+03  |
| 6  | -8.277093e+02 | 2.089122e+03  | -1.678050e+02 |
| 7  | -7.366665e+01 | 4.418658e+03  | -6.442191e+03 |
| 8  | -3.568597e+03 | -3.751507e+03 | -1.123984e+04 |
| 9  | -3.642401e+02 | 2.209078e+02  | -9.736536e+02 |
| 10 | 2.658384e+01  | 1.356648e+03  | -1.386296e+03 |
| 11 | 7.083682e+02  | -2.443123e+03 | 1.094483e+03  |
| 12 | 4.848631e+03  | 6.151292e+02  | -1.895760e+03 |
| 13 | 9.095210e+02  | -1.038916e+03 | 6.599387e+03  |
| 14 | 2.621225e+02  | -8.957590e+02 | -1.015972e+03 |
| 15 | -3.335622e+02 | -1.181612e+03 | 1.004869e+02  |
| 16 | 1.456514e+03  | 1.182420e+03  | 8.696916e+01  |
| 17 | 5.599550e+01  | -2.025137e+02 | -2.634635e+02 |
| 18 | 9.705165e+01  | 3.561789e+02  | 1.505290e+02  |
| 19 | -1.599216e+02 | 1.611880e+03  | -1.632240e+03 |
| 20 | -1.527250e+03 | 1.195128e+03  | 1.436934e+03  |
| 21 | 3.982741e+02  | 1.791264e+02  | -7.560899e+01 |
| 22 | -1.750175e+03 | -3.163378e+02 | 1.456794e+03  |
| 23 | 9.673777e+02  | 3.992025e+02  | 4.537925e+02  |
| 24 | 3.356109e+02  | 9.352436e+01  | -3.885542e+02 |
| 25 | -3.690157e+02 | 2.368134e+02  | -4.994193e+02 |
| 26 | -1.415548e+03 | -4.604367e+02 | -1.030459e+02 |
| 27 | 8.364564e+02  | 2.308265e+03  | -8.823420e+02 |
| 28 | -3.851048e+02 | 5.070339e+01  | -7.193823e+01 |
| 29 | -1.064078e+03 | -1.033155e+03 | 4.402568e+02  |
| 30 | 2.499275e+02  | -4.081087e+02 | 2.663059e+02  |
| 31 | -4.690639e+00 | -4.018978e+03 | 2.123480e+03  |
| 32 | -4.787106e+03 | 2.492053e+03  | 8.711384e+02  |
| 33 | 4.712624e+02  | 1.339629e+03  | -6.330404e+03 |
| 34 | -6.961511e+03 | 1.073867e+03  | -1.052101e+03 |
| 35 | -7.839246e+02 | 1.208413e+02  | -1.117887e+03 |
| 36 | 1.046899e+04  | 4.907221e+01  | -3.776749e+03 |
| 37 | 8.470096e+02  | 9.401995e+01  | -3.130426e+02 |
| 38 | 4.883021e+03  | 2.371843e+03  | 6.355933e+02  |
| 39 | -8.871233e+03 | 1.423312e+03  | 2.747366e+03  |
| 40 | 2.574099e+01  | -2.038552e+03 | -8.953594e+02 |
| 41 | -1.127235e+03 | -6.624909e+02 | -1.693026e+02 |
| 42 | -1.031052e+03 | 1.654768e+03  | 5.680643e+02  |
| 43 | -2.165110e+01 | 1.620169e+03  | 7.659615e+02  |
| 44 | -2.717671e+03 | -6.613816e+03 | 5.935961e+03  |
| 45 | 3.548232e+02  | 1.288234e+03  | -3.668194e+02 |
| 46 | 1.545083e+02  | -8.553171e+03 | 8.886386e+01  |

|    |               |               |               |
|----|---------------|---------------|---------------|
| 47 | 7.389413e+01  | -1.186659e+03 | 8.544485e+02  |
| 48 | 1.936019e+03  | -1.986749e+03 | 1.708035e+02  |
| 49 | 3.322979e+02  | 3.087891e+03  | -5.703284e+03 |
| 50 | 6.091681e+03  | -3.544374e+03 | 5.466542e+02  |
| 51 | -5.503531e+02 | -1.839033e+02 | 8.077098e+02  |
| 52 | 5.610298e+03  | 4.028740e+03  | 4.328765e+02  |
| 53 | 1.693178e+03  | 5.611659e+02  | 3.977853e+03  |
| 54 | -1.113502e+03 | -8.999558e+03 | 2.657412e+03  |
| 55 | -4.874458e+01 | -1.851737e+02 | -3.789920e+02 |
| 56 | -1.603032e+03 | -7.320818e+03 | 1.373506e+03  |
| 57 | -5.596786e+03 | 4.580298e+03  | 8.096370e+03  |
| 58 | -5.418999e+03 | 1.368708e+03  | -3.878816e+03 |
| 59 | 1.208908e+03  | 1.089132e+03  | -6.400692e+02 |
| 60 | -2.522005e+03 | -1.415681e+03 | 3.003508e+03  |
| 61 | 8.764111e+02  | 1.353240e+03  | 1.136943e+04  |
| 62 | -2.271150e+03 | 9.821789e+02  | 1.463214e+03  |
| 63 | -1.182950e+03 | -6.273823e+02 | -5.893388e+01 |
| 64 | 9.388354e+03  | -7.317621e+03 | 1.536912e+03  |
| 65 | 1.626517e+03  | -5.363648e+02 | -3.647640e+03 |
| 66 | 5.454822e+03  | 4.499225e+02  | 3.381201e+02  |
| 67 | 5.801093e+03  | -8.778726e+03 | 4.633507e+02  |

trajectory 9

| atom | VX | VY | VZ |
|------|----|----|----|
|------|----|----|----|

trajectory 9

| atom | VX            | VY            | VZ            |
|------|---------------|---------------|---------------|
| 1    | -1.251995e+02 | 8.193663e+01  | 7.866034e+01  |
| 2    | -8.838551e+02 | -3.127967e+02 | 9.056736e+02  |
| 3    | -1.053886e+03 | 1.946368e+03  | 1.893926e+03  |
| 4    | 9.261890e-01  | -1.173951e+03 | -6.333877e+02 |
| 5    | 5.688071e+02  | -9.290520e+02 | 1.089115e+02  |
| 6    | 2.518372e+03  | 3.942530e+03  | 2.638485e+03  |
| 7    | 6.494129e+03  | 3.099127e+03  | -5.338531e+03 |
| 8    | -1.084292e+04 | 9.831362e+02  | -4.188395e+03 |
| 9    | 1.088432e+02  | 1.878213e+02  | 5.075909e+02  |
| 10   | 1.109836e+03  | -1.735996e+03 | -8.779217e+02 |
| 11   | 1.846303e+03  | 1.388461e+02  | -1.326368e+02 |
| 12   | -2.232470e+03 | 2.018227e+03  | 5.828355e+03  |
| 13   | 7.929696e+02  | -8.255754e+02 | 9.347295e+03  |
| 14   | 1.678493e+02  | -2.175311e+02 | 3.058844e+02  |
| 15   | 2.509451e+03  | 1.746801e+02  | -9.868481e+02 |



|    |               |               |               |
|----|---------------|---------------|---------------|
| 16 | -8.800098e+02 | 2.103020e+02  | 3.862313e+02  |
| 17 | 1.698939e+01  | -1.416342e+02 | -3.424654e+02 |
| 18 | -1.854454e+02 | -6.428019e+01 | 6.726302e+02  |
| 19 | -1.085271e+03 | 1.720758e+03  | 8.273084e+02  |
| 20 | -5.597107e+02 | 4.986851e+02  | -1.046407e+03 |
| 21 | 4.434298e+02  | -2.180481e+02 | 3.425929e+02  |
| 22 | 3.534075e+02  | 8.510600e+02  | 4.918114e+02  |
| 23 | 2.152220e+02  | -1.183150e+03 | 9.016170e+02  |
| 24 | 9.129506e+02  | 1.155261e+03  | -6.459742e+02 |
| 25 | 8.898768e+02  | -6.913485e+02 | 6.255167e+02  |
| 26 | -4.378146e+02 | -8.471839e+02 | -4.139544e+01 |
| 27 | -4.742306e+02 | 8.574925e+02  | 2.612556e+02  |
| 28 | 1.212798e+03  | -1.623573e+03 | -7.410286e+02 |
| 29 | -3.309362e+02 | -9.336572e+02 | 1.069279e+02  |
| 30 | -8.028204e+01 | 7.754465e+02  | 6.864675e+02  |
| 31 | -9.220535e+03 | -4.984041e+03 | -2.960748e+03 |
| 32 | 1.559995e+03  | 1.906883e+03  | -2.396516e+03 |
| 33 | -2.013186e+03 | -5.232149e+03 | -5.267540e+03 |
| 34 | 6.467597e+03  | 2.548690e+03  | -1.992144e+03 |
| 35 | -1.389034e+03 | 1.337761e+02  | 1.533030e+02  |
| 36 | 2.991787e+03  | 6.676574e+03  | -4.275075e+03 |
| 37 | 1.832591e+03  | 9.163247e+02  | 2.072395e+02  |
| 38 | -8.207597e+03 | -3.664035e+03 | -7.149976e+01 |
| 39 | -1.679644e+03 | 2.056797e+03  | 1.771049e+03  |
| 40 | 6.795917e+02  | 9.253658e+01  | 1.727994e+03  |
| 41 | -3.371769e+01 | -4.681990e+01 | -1.408289e+03 |
| 42 | -9.201875e+02 | 1.232049e+03  | -5.742395e+02 |
| 43 | -1.068914e+03 | -5.065141e+02 | 1.390766e+03  |
| 44 | 4.752533e+03  | 5.470593e+03  | -4.968275e+03 |
| 45 | -1.282374e+02 | 2.506067e+00  | -4.730478e+02 |
| 46 | -8.356702e+02 | -5.037642e+03 | -5.578816e+02 |
| 47 | 1.532515e+03  | 1.100018e+03  | -9.233869e+02 |
| 48 | 4.373737e+03  | 1.382405e+03  | -5.132778e+02 |
| 49 | -8.213186e+03 | -6.320895e+03 | 2.406638e+03  |
| 50 | 3.066689e+03  | -3.496968e+03 | 3.291539e+03  |
| 51 | -8.422893e+02 | 2.066600e+02  | 7.378153e+02  |
| 52 | -2.677412e+01 | -1.559318e+03 | -4.799664e+03 |
| 53 | 5.799787e+03  | 2.680663e+03  | -7.321003e+03 |
| 54 | 4.650512e+02  | 9.363753e+03  | -6.686852e+03 |
| 55 | -4.853019e+02 | -1.349528e+03 | -1.834204e+02 |
| 56 | 1.832526e+03  | 2.952390e+02  | -2.615112e+03 |
| 57 | 2.059503e+03  | -6.178967e+03 | -1.039845e+04 |
| 58 | -2.621008e+02 | 4.253675e+03  | 2.759863e+03  |
| 59 | -1.176049e+03 | 4.860826e+02  | -8.885568e+02 |
| 60 | -1.022438e+03 | -4.293972e+03 | 3.532251e+02  |
| 61 | 1.037195e+03  | -3.019693e+03 | 8.205196e+03  |

|    |               |               |               |
|----|---------------|---------------|---------------|
| 62 | -4.230462e+03 | 2.449540e+03  | 2.383145e+03  |
| 63 | -5.675563e+02 | -1.382877e+03 | 4.898018e+02  |
| 64 | -1.765956e+03 | 5.660587e+03  | 6.254663e+03  |
| 65 | -2.038443e+03 | -4.916843e+02 | -2.884398e+03 |
| 66 | 1.830684e+03  | 6.383040e+03  | -1.417265e+03 |
| 67 | -3.018468e+03 | 2.910491e+03  | -2.304081e+03 |

trajectory 10

| atom | VX | VY | VZ |
|------|----|----|----|
|------|----|----|----|

trajectory 10

| atom | VX            | VY            | VZ            |
|------|---------------|---------------|---------------|
| 1    | 1.458900e+02  | -1.735138e+02 | -6.232349e+02 |
| 2    | -2.793496e+01 | -3.824808e+02 | 8.636755e+02  |
| 3    | -1.307811e+02 | -1.086040e+03 | 2.034156e+03  |
| 4    | 9.148939e+02  | -4.522801e+02 | -1.855364e+02 |
| 5    | -8.235280e+01 | 1.507000e+03  | 1.134587e+03  |
| 6    | 1.367282e+03  | -2.354992e+03 | -2.499466e+03 |
| 7    | 1.409275e+03  | -2.343379e+03 | 1.800940e+03  |
| 8    | -5.796260e+03 | 6.712008e+02  | -1.027322e+04 |
| 9    | 1.233646e+01  | 4.055136e+02  | 2.772100e+02  |
| 10   | 4.186450e+02  | 3.851606e+02  | -5.743871e+01 |
| 11   | -7.744641e+02 | -1.161884e+02 | -1.071536e+02 |
| 12   | 7.114188e+02  | 3.218551e+03  | -5.848930e+03 |
| 13   | 2.098635e+03  | -4.527900e+03 | 6.269139e+03  |
| 14   | 3.904865e+02  | -4.429201e+02 | 7.992507e+01  |
| 15   | -4.596887e+02 | 8.243283e+02  | 7.124395e+02  |
| 16   | 6.133675e+01  | -3.945679e+02 | 7.933538e+01  |
| 17   | -2.437861e+02 | 1.907911e+02  | -1.252000e+02 |
| 18   | -1.193718e+02 | 1.474999e+03  | 6.709545e+02  |
| 19   | 3.721961e+02  | 1.010947e+03  | -1.755779e+03 |
| 20   | -6.786694e+02 | 9.094422e+02  | -1.060005e+03 |
| 21   | -3.792965e+02 | -7.696715e+02 | 9.496327e+02  |
| 22   | 2.714365e+03  | 1.161582e+02  | 4.386331e+02  |
| 23   | -2.043546e+03 | -1.141868e+01 | 3.313993e+02  |
| 24   | 7.548306e+01  | -2.254562e+02 | -9.658125e+02 |
| 25   | -1.926045e+03 | 6.521363e+02  | 1.700268e+02  |
| 26   | -5.619587e+01 | -1.458350e+02 | 6.562691e+02  |
| 27   | 1.178949e+03  | 8.748666e+02  | -2.226174e+03 |
| 28   | -1.407079e+03 | -1.005578e+03 | 2.802237e+02  |
| 29   | 5.439925e+02  | -2.396374e+02 | 1.053686e+03  |
| 30   | 9.318453e+02  | -2.874062e+02 | -1.379830e+02 |

|    |               |               |               |
|----|---------------|---------------|---------------|
| 31 | 5.259015e+03  | 5.152602e+03  | -3.465809e+02 |
| 32 | 4.310853e+03  | -1.889747e+03 | 4.551238e+03  |
| 33 | -2.212875e+03 | -1.035275e+03 | -1.260940e+03 |
| 34 | -4.141519e+03 | 1.619984e+03  | 9.918688e+02  |
| 35 | 1.605309e+03  | 6.783872e+02  | -2.811525e+02 |
| 36 | -8.726081e+03 | 1.807117e+02  | 2.259858e+03  |
| 37 | -7.969889e+02 | 4.782193e+02  | 1.371152e+03  |
| 38 | -4.598296e+03 | 7.607207e+03  | -2.551026e+03 |
| 39 | -1.646419e+03 | -5.834012e+03 | -5.903069e+03 |
| 40 | 2.348747e+03  | -5.148951e+00 | -9.633057e+02 |
| 41 | 3.010884e+02  | 4.887306e+02  | 1.033680e+03  |
| 42 | -1.294510e+02 | -1.858132e+03 | -1.255914e+02 |
| 43 | -6.689623e+02 | -3.614828e+02 | -4.372146e+02 |
| 44 | 6.500985e+03  | -3.968224e+03 | -5.286873e+03 |
| 45 | -3.163824e+01 | 3.390814e+02  | -1.154807e+02 |
| 46 | -1.315443e+03 | 7.523477e+02  | 1.461687e+03  |
| 47 | -6.735241e+02 | 5.894145e+02  | 5.007364e+02  |
| 48 | 7.458615e+02  | 1.900014e+03  | 1.811385e+03  |
| 49 | 3.174221e+03  | 6.193122e+03  | -1.163012e+02 |
| 50 | -1.321838e+04 | 2.476833e+03  | 7.633360e+03  |
| 51 | -7.068276e+02 | -2.237292e+03 | 6.451473e+02  |
| 52 | 5.778260e+03  | -2.536623e+03 | 7.242114e+01  |
| 53 | 2.569959e+03  | 1.630199e+02  | 1.275507e+03  |
| 54 | 4.396795e+03  | 8.347126e+03  | -6.289436e+03 |
| 55 | -1.971263e+02 | 3.865740e+02  | 1.555281e+03  |
| 56 | 1.154317e+04  | 1.877985e+03  | -1.577105e+03 |
| 57 | 6.282815e+02  | -2.352054e+03 | 1.386116e+03  |
| 58 | -2.505531e+03 | -2.218117e+03 | 1.793015e+03  |
| 59 | 7.840038e+02  | -5.979789e+02 | 8.445776e+02  |
| 60 | 1.277383e+03  | -7.995861e+03 | -2.358139e+03 |
| 61 | -1.556289e+03 | 3.667656e+03  | -5.609478e+03 |
| 62 | -4.069040e+03 | -3.461699e+03 | -9.523390e+02 |
| 63 | 6.031499e+02  | -8.596677e+01 | 1.052058e+03  |
| 64 | -4.096262e+03 | -8.374913e+02 | -1.815062e+03 |
| 65 | 1.560442e+03  | -2.323551e+03 | -4.526705e+03 |
| 66 | -8.671170e+03 | -3.559361e+03 | -1.844780e+03 |
| 67 | 3.002135e+03  | -4.682141e+03 | 1.851189e+03  |

trajectory 11

| atom | VX            | VY           | VZ            |
|------|---------------|--------------|---------------|
| 1    | 6.517530e+01  | 1.646402e+02 | 1.969518e+01  |
| 2    | 3.074397e+02  | 8.365253e+02 | 3.732099e+02  |
| 3    | 5.457626e+02  | 6.697279e+02 | -4.046145e+02 |
| 4    | -8.391054e+02 | 9.632117e+01 | 4.860716e+02  |

|    |               |               |               |
|----|---------------|---------------|---------------|
| 5  | 1.460564e+02  | -3.075680e+02 | 6.121658e+02  |
| 6  | -3.155267e+02 | 2.414912e+03  | -1.439568e+03 |
| 7  | -2.535582e+02 | -6.526068e+03 | -5.890599e+03 |
| 8  | 3.941901e+03  | 1.581445e+03  | 5.637714e+03  |
| 9  | 5.000416e+02  | -2.329595e+00 | -2.349540e+03 |
| 10 | -8.117196e+02 | -1.943901e+02 | 2.037923e+02  |
| 11 | 4.357598e+02  | -1.261990e+03 | 1.270372e+03  |
| 12 | 6.259493e+03  | 5.143186e+02  | -1.996746e+03 |
| 13 | 2.076744e+03  | 8.386368e+03  | -1.464457e+03 |
| 14 | -8.671768e+02 | -3.328851e+02 | 7.465342e+02  |
| 15 | 1.138557e+03  | 2.001859e+03  | 3.122657e+02  |
| 16 | 1.955673e+01  | -7.698348e+02 | -8.413303e+02 |
| 17 | -1.394225e+02 | -4.894225e+02 | 1.078670e+02  |
| 18 | 5.172016e+02  | 8.501553e+00  | 9.944884e+02  |
| 19 | -2.115491e+02 | -6.208905e+02 | 3.277006e+02  |
| 20 | 9.788215e+02  | -4.139379e+02 | -6.378006e+02 |
| 21 | -3.637040e+01 | -8.685790e+02 | -2.975175e+02 |
| 22 | 1.344268e+03  | -1.058604e+03 | 1.373557e+03  |
| 23 | -7.453768e+02 | 9.430820e+01  | -3.791251e+02 |
| 24 | -7.469507e+02 | 3.709379e+02  | 1.393891e+02  |
| 25 | -6.139111e+02 | 1.639140e+03  | 4.134060e+01  |
| 26 | -4.876569e+02 | 4.550492e+02  | 1.773221e+02  |
| 27 | 5.022709e+02  | 1.111048e+03  | -1.124823e+03 |
| 28 | 7.204518e+02  | -2.170704e+02 | -6.262452e+02 |
| 29 | 2.103702e+03  | 1.498105e+03  | -3.754497e+02 |
| 30 | 8.288550e+02  | -7.621064e+02 | -8.651733e+02 |
| 31 | -8.861640e+03 | 2.824049e+03  | -1.858733e+03 |
| 32 | 1.380681e+03  | -7.053903e+03 | 5.717857e+03  |
| 33 | -3.861118e+03 | 1.282334e+03  | -3.920732e+03 |
| 34 | -3.952624e+03 | 3.541137e+03  | 3.669685e+03  |
| 35 | -1.482403e+03 | 6.173219e+02  | 1.296519e+03  |
| 36 | 7.374030e+02  | -1.235272e+03 | -5.411686e+03 |
| 37 | -9.182936e+02 | 7.694718e+02  | 7.154632e+01  |
| 38 | -3.507041e+02 | -7.489195e+03 | -2.804285e+03 |
| 39 | 8.515247e+03  | -9.333261e+02 | -3.660524e+03 |
| 40 | -2.230882e+03 | -9.781935e+02 | -1.031263e+02 |
| 41 | -4.069894e+02 | 6.800360e+02  | 3.156106e+02  |
| 42 | 1.181249e+03  | -4.164115e+02 | 1.284791e+03  |
| 43 | -6.891015e+02 | -1.857644e+03 | -4.144673e+02 |
| 44 | -4.909769e+03 | 3.133561e+03  | -3.151997e+03 |
| 45 | 3.090721e+02  | -4.932678e+02 | -1.259257e+02 |
| 46 | -1.893343e+03 | 5.286201e+02  | 2.861682e+03  |
| 47 | 4.087553e+02  | -6.663784e+01 | 7.163578e+02  |
| 48 | 6.063372e+02  | 9.120621e+03  | -8.625265e+03 |
| 49 | -5.602207e+03 | 3.260372e+03  | 2.567368e+03  |
| 50 | 2.130598e+03  | -6.006463e+02 | -2.523610e+03 |

|    |               |               |               |
|----|---------------|---------------|---------------|
| 51 | -1.010522e+03 | 1.087509e+02  | 1.753572e+03  |
| 52 | 5.670903e+02  | -9.297410e+01 | -2.826680e+03 |
| 53 | 7.514357e+03  | -2.607250e+03 | -5.196807e+03 |
| 54 | -3.331362e+03 | 8.435114e+03  | -2.532260e+03 |
| 55 | 7.091176e+02  | 6.662076e+02  | -4.517795e+02 |
| 56 | -6.917991e+00 | -2.573168e+03 | -8.161129e+02 |
| 57 | -2.367619e+02 | 2.912927e+02  | 2.392116e+02  |
| 58 | -1.115434e+04 | -9.072298e+03 | 3.624994e+03  |
| 59 | 2.546781e+03  | 8.988546e+02  | -9.603268e+02 |
| 60 | -2.369581e+03 | -1.339896e+03 | -3.362124e+03 |
| 61 | -1.210092e+03 | -3.056955e+03 | 9.899591e+03  |
| 62 | -1.208656e+03 | -2.027622e+03 | 8.920762e+02  |
| 63 | 5.930169e+01  | 2.613905e+03  | -6.337367e+02 |
| 64 | -3.372014e+03 | -8.121593e+03 | -2.169700e+03 |
| 65 | -3.626292e+03 | -7.672359e+02 | -2.219267e+03 |
| 66 | -2.262414e+03 | -1.094872e+03 | -4.615695e+03 |
| 67 | 1.198576e+03  | -5.928436e+03 | 3.408209e+03  |

trajectory 12

| atom | VX            | VY            | VZ            |
|------|---------------|---------------|---------------|
| 1    | -2.779839e+01 | -5.110074e+01 | 3.757387e+02  |
| 2    | -5.377980e+02 | 1.332973e+03  | -2.635003e+02 |
| 3    | 2.652943e+02  | -2.153945e+02 | 1.098686e+03  |
| 4    | -6.665963e+02 | -2.720323e+02 | -8.478874e+02 |
| 5    | 3.474449e+02  | 2.513927e+02  | 1.041769e+02  |
| 6    | 1.995841e+03  | -3.759932e+03 | -3.954572e+03 |
| 7    | -1.000263e+03 | -2.145372e+03 | -2.025931e+03 |
| 8    | -8.040620e+03 | -9.036122e+03 | -6.104521e+02 |
| 9    | -1.137950e+03 | -2.128170e+02 | -4.528140e+02 |
| 10   | 6.731773e+02  | -6.778170e+02 | 5.566258e+02  |
| 11   | 1.172122e+03  | 6.242379e+02  | -1.469100e+03 |
| 12   | -7.691662e+03 | -2.507837e+03 | 1.885273e+03  |
| 13   | 4.445047e+03  | -6.140546e+03 | -8.077014e+03 |
| 14   | -4.817927e+02 | 9.173611e+01  | -3.732029e+02 |
| 15   | 1.792282e+02  | 2.805389e+01  | -1.312580e+02 |
| 16   | -7.007322e+02 | -1.117422e+03 | 3.813712e+02  |
| 17   | 2.442853e+02  | 1.538057e+02  | -1.061271e+02 |
| 18   | 2.164254e+03  | 8.336729e+02  | -5.491039e+02 |
| 19   | -1.232975e+03 | -1.670544e+03 | -1.552391e+03 |
| 20   | 2.713716e+02  | -1.239820e+01 | 1.177240e+03  |
| 21   | -1.258883e+03 | 1.007679e+03  | 3.646090e+02  |
| 22   | -1.332366e+03 | 7.824871e+02  | -1.063722e+03 |
| 23   | 1.724678e+02  | 3.090122e+02  | -8.061574e+02 |
| 24   | 6.930611e+02  | 5.172990e+02  | 1.110946e+02  |

|    |               |               |               |
|----|---------------|---------------|---------------|
| 25 | -5.158349e+02 | -6.354033e+02 | -8.435930e+02 |
| 26 | 3.575981e+02  | 5.138918e+02  | -4.336885e+02 |
| 27 | -7.621809e+02 | 1.197134e+03  | 2.901494e+02  |
| 28 | 1.291280e+03  | -8.516053e+01 | 2.430226e+02  |
| 29 | -9.293478e+02 | -2.005487e+03 | -9.012580e+02 |
| 30 | 8.321671e+02  | -1.007846e+03 | 1.444645e+03  |
| 31 | 8.464077e+03  | 2.630805e+03  | 9.248430e+01  |
| 32 | -5.940137e+03 | 7.463362e+03  | -4.588618e+02 |
| 33 | 2.633995e+03  | 7.937376e+02  | -7.554536e+03 |
| 34 | 5.436483e+03  | -7.390430e+02 | -1.220495e+03 |
| 35 | 7.277055e+02  | -1.095839e+03 | 1.275858e+02  |
| 36 | -3.776735e+03 | 4.773876e+02  | 3.058511e+03  |
| 37 | 1.807756e+02  | 4.790879e+02  | -3.445128e+02 |
| 38 | -2.296487e+02 | -2.295632e+03 | -4.087547e+03 |
| 39 | 7.353004e+03  | -6.243861e+03 | -1.261011e+03 |
| 40 | -1.123259e+03 | 5.752460e+02  | -1.588741e+03 |
| 41 | -1.182678e+03 | -5.466895e+02 | 1.412004e+03  |
| 42 | 1.410818e+03  | 8.835439e+02  | 7.186179e+02  |
| 43 | -1.207104e+02 | 1.766834e+03  | 9.530805e+02  |
| 44 | -2.013902e+03 | 2.001440e+03  | -6.086111e+03 |
| 45 | -9.680958e+02 | 2.033005e+02  | 3.286261e+02  |
| 46 | 2.355459e+03  | -1.200698e+04 | 2.976255e+03  |
| 47 | 1.312031e+03  | -4.485288e+02 | 2.454495e+02  |
| 48 | -7.745920e+03 | -2.255222e+02 | 2.241860e+03  |
| 49 | -1.868802e+03 | 7.418495e+02  | 2.188908e+03  |
| 50 | -1.749278e+03 | 1.949303e+03  | -2.226368e+03 |
| 51 | -6.462110e+02 | -1.255344e+02 | -1.267487e+03 |
| 52 | 2.642115e+03  | 1.631814e+03  | 8.371356e+02  |
| 53 | 6.712349e+03  | -2.386289e+03 | 1.056740e+04  |
| 54 | -2.224362e+03 | 2.044226e+03  | 3.429881e+03  |
| 55 | 6.027811e+02  | 2.165605e+03  | 5.826096e+02  |
| 56 | -5.014965e+03 | -6.281769e+03 | -3.190164e+02 |
| 57 | 3.177368e+03  | -8.032032e+03 | 1.593952e+02  |
| 58 | -5.298848e+02 | -1.209376e+03 | 5.260321e+02  |
| 59 | -4.354129e+02 | -2.666115e+02 | -2.059894e+02 |
| 60 | -6.925071e+03 | -8.504708e+03 | -5.795774e+02 |
| 61 | 1.866244e+03  | -2.424556e+03 | -5.300260e+02 |
| 62 | 3.327430e+03  | 3.761742e+03  | 1.192175e+03  |
| 63 | 1.487445e+03  | -2.334464e+02 | 1.227323e+03  |
| 64 | -5.911321e+03 | 5.747627e+03  | 1.792598e+03  |
| 65 | -6.753625e+03 | -6.425594e+03 | -3.970531e+02 |
| 66 | -4.344553e+03 | -1.280262e+02 | -1.869238e+03 |
| 67 | 2.821428e+02  | -7.222490e+02 | 8.986067e+03  |

trajectory 13

| atom | VX            | VY            | VZ            |
|------|---------------|---------------|---------------|
| 1    | -3.909509e+01 | -6.835160e+01 | 9.080964e+01  |
| 2    | -1.106344e+02 | -1.322322e+02 | -6.741806e+02 |
| 3    | 1.240278e+03  | -4.635750e+02 | -3.904986e+02 |
| 4    | -1.265501e+03 | 2.240314e+02  | -3.577820e+01 |
| 5    | 5.848946e+02  | 6.745391e+01  | 5.250154e+02  |
| 6    | -1.295046e+02 | 5.815696e+03  | 2.861817e+03  |
| 7    | 1.508900e+02  | -2.468743e+03 | -1.142244e+03 |
| 8    | -1.102722e+04 | -6.309050e+03 | 2.276583e+03  |
| 9    | 1.243047e+03  | -1.021669e+02 | 1.598794e+03  |
| 10   | -1.019153e+03 | -1.347989e+03 | 4.282252e+02  |
| 11   | -1.129928e+03 | 3.276962e+03  | 7.300456e+01  |
| 12   | -2.976445e+03 | -5.299982e+03 | 1.945836e+03  |
| 13   | -1.213671e+03 | 4.961338e+03  | -3.439468e+03 |
| 14   | -5.620626e+02 | -5.265657e+02 | 9.066928e+02  |
| 15   | 6.948739e+02  | -3.093300e+02 | -8.484109e+02 |
| 16   | -6.524151e+02 | -1.206969e+02 | 1.143524e+03  |
| 17   | 4.188769e+02  | -1.683450e+02 | -2.295180e+02 |
| 18   | -6.884480e+01 | -3.285904e+02 | -5.697944e+00 |
| 19   | -6.787093e+02 | -5.642596e+02 | -3.170403e+02 |
| 20   | -6.897500e+02 | 1.575908e+03  | -1.137869e+03 |
| 21   | 4.066610e+02  | 1.019166e+03  | 5.280280e+01  |
| 22   | -1.094827e+03 | 3.140863e+02  | 1.530424e+03  |
| 23   | 2.667873e+02  | -1.339273e+03 | -7.085714e+01 |
| 24   | 5.415337e+02  | 1.147388e+02  | -6.411887e+01 |
| 25   | -8.407186e+02 | 7.248507e+02  | 2.181623e+03  |
| 26   | 2.410293e+02  | -2.284271e+01 | 2.470213e+02  |
| 27   | -2.411505e+02 | -5.950629e+02 | -1.914641e+02 |
| 28   | 1.890393e+03  | -6.690271e+02 | 1.041127e+03  |
| 29   | -6.760662e+02 | -1.490808e+03 | 9.203607e+02  |
| 30   | 1.210517e+03  | 1.001347e+03  | -1.048259e+03 |
| 31   | -5.781200e+03 | -3.728340e+02 | 1.916641e+03  |
| 32   | -7.719016e+03 | 5.387450e+03  | -3.272492e+02 |
| 33   | 1.895658e+03  | -6.059471e+02 | 2.621914e+03  |
| 34   | -9.628534e+03 | 2.222101e+03  | -4.877957e+03 |
| 35   | 5.461576e+02  | 1.190791e+03  | -1.088991e+03 |
| 36   | 1.241065e+03  | -4.320396e+03 | -7.500412e+02 |
| 37   | 8.512247e+01  | 2.511172e+03  | -9.811478e+02 |
| 38   | 7.302011e+03  | 2.343192e+03  | 3.416498e+03  |
| 39   | 3.273775e+03  | -3.162373e+03 | 1.283536e+03  |
| 40   | -8.049719e+02 | -4.069334e+02 | -5.096904e+02 |
| 41   | 1.745750e+03  | 5.075312e+02  | 1.043926e+01  |
| 42   | -8.718026e+00 | 1.531708e+02  | 4.194927e+02  |
| 43   | 5.967222e+01  | -1.796239e+03 | -9.139981e+02 |
| 44   | -9.252978e+03 | -8.669003e+02 | -5.951074e+01 |

|    |               |               |               |
|----|---------------|---------------|---------------|
| 45 | -3.281704e+02 | -4.943905e+02 | 1.856200e+02  |
| 46 | -3.768112e+03 | 2.064430e+03  | 3.158835e+02  |
| 47 | 1.576836e+03  | -3.894978e+02 | 9.800778e+01  |
| 48 | -3.376398e+03 | 4.554367e+03  | 1.308210e+03  |
| 49 | 2.185907e+03  | -3.613890e+03 | -3.921340e+03 |
| 50 | -1.012186e+04 | -3.229301e+03 | 6.334547e+03  |
| 51 | -1.290189e+02 | -2.323010e+02 | -3.256794e+02 |
| 52 | 1.002580e+04  | -4.617626e+01 | -5.367756e+03 |
| 53 | -7.083941e+03 | 4.902557e+03  | 4.486676e+02  |
| 54 | 1.479594e+03  | 2.180881e+03  | -1.649439e+03 |
| 55 | -4.441329e+02 | 1.893447e+02  | -1.440586e+02 |
| 56 | -3.596167e+03 | -2.034841e+03 | 9.197294e+03  |
| 57 | -1.282406e+03 | 2.543653e+03  | 2.720818e+02  |
| 58 | -3.209022e+02 | 3.005616e+03  | 3.884257e+03  |
| 59 | 1.129383e+03  | -2.891914e+02 | -1.525867e+03 |
| 60 | -3.094699e+03 | 1.937161e+03  | -2.639425e+02 |
| 61 | -3.981702e+03 | 2.593887e+02  | 8.714576e+02  |
| 62 | -9.933318e+03 | 1.835062e+03  | -4.731468e+03 |
| 63 | 6.448218e+02  | -2.309891e+02 | -9.509286e+02 |
| 64 | 1.070031e+03  | -7.255766e+03 | -9.576868e+03 |
| 65 | -6.485885e+02 | 7.171681e+02  | 3.071961e+03  |
| 66 | -7.070228e+03 | 5.383149e+03  | 7.827365e+02  |
| 67 | -3.341028e+03 | -4.526729e+02 | -4.608005e+03 |

trajectory 14

| atom | VX            | VY            | VZ            |
|------|---------------|---------------|---------------|
| 1    | -3.250195e+02 | -1.884553e+02 | -2.580482e+02 |
| 2    | 3.449460e+02  | -9.204548e+02 | 5.860005e+02  |
| 3    | -1.140571e+03 | 7.797436e+02  | -1.639425e+03 |
| 4    | 1.359729e+03  | 7.806805e+02  | 9.690178e+02  |
| 5    | -4.094483e+02 | 3.188255e+02  | -7.636395e+02 |
| 6    | -7.958358e+03 | -7.178671e+02 | 6.792304e+03  |
| 7    | 3.683832e+03  | 5.595555e+03  | 1.180196e+03  |
| 8    | 1.207517e+03  | 3.083397e+03  | -2.060117e+03 |
| 9    | -1.379012e+02 | 3.420339e+02  | 2.456914e+02  |
| 10   | 1.324703e+03  | -5.769234e+02 | -1.016673e+03 |
| 11   | 8.521622e+02  | -2.053691e+03 | -1.442310e+03 |
| 12   | -1.053329e+04 | 5.298949e+02  | 2.638910e+03  |
| 13   | -5.564287e+03 | -1.689086e+03 | 3.125991e+03  |
| 14   | 7.474024e+02  | 8.130576e+01  | 1.144980e+03  |
| 15   | -1.869422e+03 | -3.619926e+02 | -1.586192e+02 |
| 16   | 1.039949e+03  | 6.958019e+02  | 3.615265e+02  |
| 17   | 2.646434e+02  | -2.931342e+01 | 3.627305e+01  |
| 18   | -2.669053e+02 | 6.802584e+02  | 3.755374e+02  |



|    |               |               |               |
|----|---------------|---------------|---------------|
| 19 | -1.256818e+03 | -5.000315e+02 | -6.108051e+02 |
| 20 | 4.025369e+02  | 4.967871e+01  | -6.041338e+02 |
| 21 | -5.465185e+02 | 2.283158e+02  | -1.486557e+02 |
| 22 | 7.374397e+02  | 8.770896e+01  | 3.066916e+02  |
| 23 | 3.973674e+02  | -5.699652e+01 | -2.639167e+02 |
| 24 | 7.088610e+02  | -4.001428e+02 | -8.199085e+02 |
| 25 | 6.750951e+02  | 1.468038e+03  | 1.850490e+03  |
| 26 | -8.733648e+01 | 2.712524e+02  | -1.656937e+02 |
| 27 | 8.785361e+02  | 3.112789e+01  | 1.188417e+02  |
| 28 | -3.340654e+02 | -4.353203e+02 | 3.100589e+02  |
| 29 | -1.652812e+03 | 6.339340e+02  | 1.249877e+03  |
| 30 | -4.437658e+02 | 2.560451e+02  | 1.322228e+02  |
| 31 | 9.041322e+03  | -6.033271e+02 | 2.873127e+03  |
| 32 | 9.359329e+02  | -5.628764e+03 | -1.878107e+03 |
| 33 | -3.681421e+03 | -2.657316e+03 | -3.937688e+03 |
| 34 | 9.102540e+01  | 6.360866e+03  | 5.197489e+03  |
| 35 | 1.134590e+02  | 8.879318e+02  | 8.403723e+02  |
| 36 | -4.031520e+03 | -7.394703e+03 | 2.707644e+03  |
| 37 | 8.605850e+02  | -7.710882e+02 | -4.715059e+01 |
| 38 | -9.127017e+03 | 3.760758e+03  | -3.634002e+03 |
| 39 | -2.996812e+03 | -8.966472e+02 | 2.780804e+03  |
| 40 | 1.703340e+02  | 8.972467e+02  | -3.691133e+02 |
| 41 | -1.684132e+03 | -9.120682e+02 | 1.515654e+03  |
| 42 | -6.361511e+02 | -5.116057e+02 | -8.353276e+02 |
| 43 | 1.281296e+03  | -2.038849e+02 | -1.438229e+03 |
| 44 | -4.748931e+03 | 6.193293e+03  | 1.509080e+03  |
| 45 | 2.934923e+02  | 1.108487e+03  | -2.109953e+02 |
| 46 | 2.192816e+03  | -2.908787e+03 | 1.878019e+03  |
| 47 | 3.714543e+02  | -3.877553e+02 | 3.460343e+02  |
| 48 | 1.896019e+03  | -4.146275e+03 | 5.009941e+03  |
| 49 | -4.076740e+03 | -2.021934e+03 | -3.148595e+03 |
| 50 | -8.485836e+03 | 4.511300e+03  | 4.461328e+03  |
| 51 | -4.967842e+02 | -8.226654e+02 | -1.699336e+03 |
| 52 | 3.263611e+03  | 7.582031e+03  | -4.722542e+03 |
| 53 | -2.157330e+03 | 5.152445e+03  | 7.091604e+03  |
| 54 | 1.373268e+03  | -8.455120e+03 | -8.294778e+02 |
| 55 | 2.955820e+03  | 6.124530e+00  | 1.235435e+03  |
| 56 | -1.658010e+03 | -8.790651e+02 | -2.604484e+03 |
| 57 | 1.761369e+02  | -3.297910e+03 | 3.327685e+03  |
| 58 | -7.127462e+03 | 3.391103e+02  | -2.628711e+03 |
| 59 | -9.266198e+02 | -9.179387e+02 | 8.131824e+01  |
| 60 | 4.420083e+03  | 7.719469e+03  | -1.781680e+03 |
| 61 | 7.976765e+02  | 1.803274e+03  | -9.469907e+02 |
| 62 | -3.780199e+03 | -1.812019e+02 | 1.875821e+03  |
| 63 | 4.367489e+02  | -3.499824e+02 | 2.805852e+02  |
| 64 | -2.662333e+03 | 5.050157e+03  | 7.785690e+03  |

|    |               |               |               |
|----|---------------|---------------|---------------|
| 65 | -2.466726e+03 | -5.148920e+03 | 5.159074e+02  |
| 66 | -5.422112e+03 | 8.669731e+01  | -5.379919e+03 |
| 67 | 8.365942e+02  | 7.367910e+03  | -5.489364e+03 |

trajectory 15

| atom | VX            | VY            | VZ            |
|------|---------------|---------------|---------------|
| 1    | -5.023820e+02 | 3.374102e+01  | 2.319952e+02  |
| 2    | 1.848727e+03  | -9.861689e+01 | 5.167152e+02  |
| 3    | -4.139889e+02 | -1.513634e+03 | -1.640527e+03 |
| 4    | -1.949940e+02 | 4.419747e+02  | 3.423703e+02  |
| 5    | 4.454754e+02  | 7.727401e+01  | -2.432045e+03 |
| 6    | -4.527409e+03 | -7.043609e+03 | 5.142152e+03  |
| 7    | -1.199952e+03 | -2.259206e+03 | 3.582315e+03  |
| 8    | -3.761870e+02 | -3.514859e+03 | 3.972441e+03  |
| 9    | -1.867202e+02 | 1.882750e+02  | -5.242313e+01 |
| 10   | -1.343434e+03 | 2.083523e+03  | -5.280975e+02 |
| 11   | -2.014473e+02 | -7.383652e+02 | 7.276556e+02  |
| 12   | -1.100075e+03 | -6.483082e+03 | 5.245060e+03  |
| 13   | 8.644249e+03  | -1.512187e+02 | -3.215029e+03 |
| 14   | -3.421381e-01 | -5.190807e+02 | 4.183379e+02  |
| 15   | -1.003565e+03 | 3.884499e+02  | 1.508813e+02  |
| 16   | 3.174593e+02  | -6.911474e+02 | 2.019495e+02  |
| 17   | 3.502775e+02  | 1.219265e+02  | 8.919797e+01  |
| 18   | 3.939678e+02  | -5.055934e-01 | -2.742046e+02 |
| 19   | -4.890243e+02 | 4.851004e+02  | -4.909712e+02 |
| 20   | 4.100467e+02  | -6.727303e+02 | -5.208329e+02 |
| 21   | -6.470338e+02 | 1.311856e+02  | -4.347571e+01 |
| 22   | 1.824242e+02  | 9.356493e+02  | 8.675710e+02  |
| 23   | 1.269754e+03  | 9.370469e+02  | 9.514831e+02  |
| 24   | -7.342999e+02 | 1.052481e+03  | -6.577850e+02 |
| 25   | -2.017324e+02 | -2.569735e+03 | 6.407628e+01  |
| 26   | 7.857946e+02  | 1.702786e+03  | 1.986820e+03  |
| 27   | 4.431784e+02  | 1.638711e+03  | -1.403752e+02 |
| 28   | -1.123280e+03 | 9.383244e+02  | -1.185101e+03 |
| 29   | 2.043061e+03  | -6.879906e+02 | 6.470465e+02  |
| 30   | -4.505042e+02 | -8.670172e+02 | 1.244985e+03  |
| 31   | 1.949641e+03  | 4.762801e+02  | -3.153817e+03 |
| 32   | -2.014110e+03 | 4.587381e+03  | 1.325184e+03  |
| 33   | 2.423644e+03  | -4.095237e+03 | 1.400361e+03  |
| 34   | -3.655149e+03 | 8.371725e+03  | -2.790419e+03 |
| 35   | 2.830105e+02  | 2.523286e+02  | 1.383797e+03  |
| 36   | 6.762558e+03  | 4.496103e+03  | -2.640237e+03 |
| 37   | 6.621008e+02  | 1.447576e+02  | -1.144917e+03 |
| 38   | -7.749946e+03 | 8.324920e+02  | -4.793225e+03 |

|    |               |               |               |
|----|---------------|---------------|---------------|
| 39 | -6.337857e+03 | -9.725794e+02 | -3.584490e+02 |
| 40 | -1.408662e+03 | -6.669176e+02 | 1.803312e+02  |
| 41 | 6.016999e+02  | -3.961351e+02 | -8.620345e+01 |
| 42 | 1.936970e+02  | -4.585208e+02 | 8.053485e+02  |
| 43 | 1.301518e+03  | 5.106131e+02  | -3.364537e+02 |
| 44 | 5.904168e+03  | 3.083245e+03  | -4.760877e+03 |
| 45 | 2.474973e+03  | -7.399707e+02 | -6.311429e+02 |
| 46 | -3.437717e+03 | -4.973895e+03 | 5.871746e+03  |
| 47 | -1.609222e+03 | -9.970343e+02 | 5.829286e+01  |
| 48 | -5.165791e+02 | 2.931787e+03  | 7.293214e+02  |
| 49 | -4.206373e+03 | -7.241961e+03 | 2.639154e+03  |
| 50 | 2.988870e+03  | 3.739006e+03  | 2.317092e+03  |
| 51 | -1.914681e+03 | -1.604060e+03 | 7.848552e+01  |
| 52 | 7.244960e+03  | 3.070286e+03  | 2.399878e+02  |
| 53 | 1.355945e+03  | 2.226149e+03  | 2.019585e+03  |
| 54 | 3.114793e+03  | -7.772225e+03 | 1.213820e+03  |
| 55 | 4.139311e+02  | -6.465847e+02 | -4.423129e+02 |
| 56 | 1.301447e+03  | 5.033572e+03  | -4.560169e+03 |
| 57 | -1.798263e+03 | -8.132296e+03 | -6.806109e+03 |
| 58 | 4.098103e+02  | 4.742230e+03  | 3.072784e+03  |
| 59 | 1.303688e+03  | -6.224882e+02 | -9.203639e+02 |
| 60 | -3.788132e+03 | 1.696945e+03  | -4.783236e+03 |
| 61 | -4.105648e+03 | -5.210021e+02 | 1.366889e+03  |
| 62 | -9.268766e+03 | 2.470878e+03  | 1.531901e+03  |
| 63 | -8.788336e+02 | 1.435908e+03  | -1.993677e+03 |
| 64 | 7.046985e+02  | -8.740476e+03 | -3.828238e+03 |
| 65 | -3.099542e+03 | -3.329181e+03 | -1.383157e+03 |
| 66 | -3.409593e+03 | -5.466291e+02 | -3.531518e+03 |
| 67 | -2.900072e+03 | 5.584194e+03  | -2.703548e+03 |

trajectory 16

| atom | VX            | VY            | VZ            |
|------|---------------|---------------|---------------|
| 1    | 2.677689e+01  | -6.429876e+01 | -9.662412e+01 |
| 2    | 1.599748e+03  | -1.226710e+03 | 7.398570e+02  |
| 3    | -5.446341e+02 | 5.553494e+02  | -2.062878e+01 |
| 4    | -3.351985e+02 | 1.267841e+03  | -1.034907e+03 |
| 5    | 3.629699e+02  | 1.094356e+03  | 2.017981e+02  |
| 6    | -8.502445e+02 | -7.529513e+03 | 3.463113e+03  |
| 7    | 3.932970e+03  | -8.546111e+03 | -1.162370e+03 |
| 8    | 1.421573e+03  | 1.113948e+03  | -6.786638e+03 |
| 9    | 5.736016e+01  | 7.115723e+02  | 1.745829e+03  |
| 10   | -3.583637e+02 | -6.881600e+02 | 6.809185e+02  |
| 11   | 3.764051e+02  | 1.289666e+03  | 2.132955e+01  |
| 12   | 1.092229e+03  | 4.275220e+03  | -2.963943e+03 |

|    |               |               |               |
|----|---------------|---------------|---------------|
| 13 | -1.109891e+03 | 2.838851e+03  | -5.706569e+03 |
| 14 | 5.430311e+02  | -7.211687e+01 | 3.719899e+02  |
| 15 | -1.173056e+03 | -3.365036e+02 | 8.696936e+02  |
| 16 | -5.368491e+02 | 1.218668e+03  | -8.013015e+00 |
| 17 | -4.385035e+02 | -5.783685e+01 | 4.509117e+02  |
| 18 | -4.850908e+02 | -1.661211e+02 | -2.873069e+02 |
| 19 | 1.146961e+03  | 2.138502e+03  | 7.866381e+02  |
| 20 | -6.924830e+01 | -8.943647e+01 | 3.460921e+02  |
| 21 | 2.006035e+02  | -1.680139e+02 | -7.735309e+02 |
| 22 | 2.680119e+03  | -9.491333e+02 | 6.775911e+00  |
| 23 | -1.244930e+03 | 9.346010e+02  | 3.190097e+02  |
| 24 | 2.478279e+02  | -8.850536e+02 | -1.156092e+02 |
| 25 | 6.967944e+02  | 4.658493e+02  | -5.266214e+02 |
| 26 | 3.295879e+02  | -1.919159e+02 | -7.000090e+02 |
| 27 | -9.778191e+02 | -1.841979e+03 | -8.058484e+02 |
| 28 | 9.309364e+02  | 9.041921e+02  | 1.273272e+01  |
| 29 | -2.323654e+03 | -7.441843e+02 | 1.737883e+03  |
| 30 | -3.144714e+02 | -8.200902e+02 | -4.638749e+02 |
| 31 | 4.265568e+03  | 2.603436e+03  | -4.141653e+03 |
| 32 | 3.765142e+03  | -8.568645e+03 | 5.703251e+02  |
| 33 | -4.619336e+03 | 2.195569e+02  | -4.988433e+02 |
| 34 | -6.012788e+03 | 1.035987e+03  | -4.641193e+02 |
| 35 | 4.942136e+02  | 1.272274e+02  | 2.432315e+02  |
| 36 | -2.707128e+03 | 8.169721e+03  | -9.643150e+02 |
| 37 | -2.795990e+02 | 2.868280e+02  | -1.143873e+03 |
| 38 | -4.450292e+03 | 4.554411e+03  | -9.793225e+03 |
| 39 | 2.546921e+03  | 1.128342e+03  | 6.032448e+03  |
| 40 | 2.865110e+02  | -1.331080e+03 | -4.619450e+01 |
| 41 | -7.183595e+02 | -8.747216e+01 | 3.148833e+02  |
| 42 | -6.222133e+02 | 9.650428e+02  | -2.968015e+02 |
| 43 | 3.077266e+02  | -3.282444e+02 | 6.938305e+02  |
| 44 | 6.130910e+03  | -1.445360e+03 | -2.370268e+03 |
| 45 | 1.642901e+03  | 2.000281e+03  | -7.826991e+02 |
| 46 | 4.436149e+03  | -1.131172e+04 | 2.334838e+03  |
| 47 | -2.470854e+02 | -1.721061e+03 | -3.457341e+02 |
| 48 | -2.566920e+03 | -2.517958e+03 | -3.850199e+00 |
| 49 | 1.501880e+03  | -1.256847e+03 | -2.891861e+03 |
| 50 | -1.879617e+03 | 4.364465e+03  | 3.786086e+01  |
| 51 | 1.246318e+03  | -1.106389e+03 | -4.464588e+02 |
| 52 | -4.318989e+01 | 1.204652e+03  | -4.275663e+02 |
| 53 | -7.265225e+03 | 2.956546e+03  | -8.835914e+03 |
| 54 | 6.107513e+03  | 1.071628e+03  | 5.360720e+02  |
| 55 | 8.217119e+02  | -6.950815e+02 | -7.832887e+02 |
| 56 | 2.758499e+03  | -7.217664e+03 | 2.850856e+03  |
| 57 | 1.509813e+03  | 4.905857e+03  | 1.108056e+04  |
| 58 | -3.748872e+03 | 1.769445e+03  | -3.316564e+03 |

|    |               |               |               |
|----|---------------|---------------|---------------|
| 59 | 9.449131e+02  | -2.718476e+02 | -7.886647e+02 |
| 60 | -6.094427e+03 | 3.578544e+03  | -4.557474e+02 |
| 61 | -3.856896e+03 | -4.330222e+02 | 1.031316e+03  |
| 62 | -1.001813e+04 | 2.661938e+03  | -3.845525e+03 |
| 63 | 9.490701e+02  | 2.302429e+02  | 4.191405e+02  |
| 64 | 4.277231e+03  | -6.107337e+03 | -4.948247e+03 |
| 65 | -4.698339e+03 | 3.001212e+03  | 4.426183e+02  |
| 66 | -2.712101e+03 | -4.528944e+03 | -9.642302e+02 |
| 67 | -1.018632e+03 | 4.700197e+03  | -5.204032e+03 |

trajectory 17

| atom | VX            | VY            | VZ            |
|------|---------------|---------------|---------------|
| 1    | 3.010415e+02  | -4.391783e+01 | 4.523262e+02  |
| 2    | -1.489522e+02 | -6.120680e+01 | -1.244103e+03 |
| 3    | -3.758320e+02 | 1.027571e+03  | -1.539579e+02 |
| 4    | 1.067182e+02  | 6.338832e+02  | -5.458103e+02 |
| 5    | 8.575028e+02  | 9.791220e+02  | -1.618054e+03 |
| 6    | -4.216998e+03 | -3.742745e+03 | 6.240461e+03  |
| 7    | -3.767717e+03 | 9.410111e+02  | 5.740887e+02  |
| 8    | -3.778878e+03 | 8.131709e+03  | 1.985519e+03  |
| 9    | -4.595765e+02 | -7.800004e+02 | 1.850818e+03  |
| 10   | 2.167466e+02  | -5.803357e+02 | 2.075529e+02  |
| 11   | -1.714055e+03 | 1.248295e+03  | -9.577145e+01 |
| 12   | 3.221222e+03  | 5.646578e+03  | -8.549203e+02 |
| 13   | -5.835390e+03 | -4.161853e+03 | 1.743309e+03  |
| 14   | 2.554684e+02  | -1.207975e+03 | -4.755893e+02 |
| 15   | -3.778711e+02 | -5.239886e+02 | 2.195192e+02  |
| 16   | 9.118063e+02  | -1.185598e+03 | 1.747972e+02  |
| 17   | -2.976851e+01 | -1.592894e+02 | 8.688768e+01  |
| 18   | 4.997474e+02  | 8.014589e+02  | 2.023285e+02  |
| 19   | -1.074248e+03 | 5.941930e+02  | -1.309727e+03 |
| 20   | -3.241384e+02 | -1.485911e+02 | -1.105207e+03 |
| 21   | 1.021954e+02  | -3.728562e+02 | 8.050407e+01  |
| 22   | -1.787032e+03 | -8.870824e+02 | -6.375631e+02 |
| 23   | 2.352471e+03  | 4.240291e+02  | 6.411074e+02  |
| 24   | -1.188485e+03 | 6.525797e+02  | 7.484075e+02  |
| 25   | 8.184252e+02  | 8.052916e+02  | 2.768990e+01  |
| 26   | 4.339056e+02  | -2.552802e+02 | -1.402564e+03 |
| 27   | 2.153383e+02  | 1.291434e+03  | 3.617115e+02  |
| 28   | -1.101287e+03 | 2.476486e+02  | -6.282638e+02 |
| 29   | -1.069275e+02 | -4.134078e+01 | 5.916587e+02  |
| 30   | -2.420519e+03 | 1.037798e+03  | -4.115336e+02 |
| 31   | -4.142405e+03 | -3.785047e+03 | 1.882292e+03  |
| 32   | -3.636825e+03 | -4.334019e+03 | 8.974695e+03  |

|    |               |               |               |
|----|---------------|---------------|---------------|
| 33 | -2.792350e+03 | -9.832896e+02 | -4.026259e+03 |
| 34 | 8.574027e+03  | 5.604637e+02  | 1.687773e+03  |
| 35 | -2.552104e+00 | -5.899820e+02 | -1.458663e+03 |
| 36 | 4.940133e+03  | 4.540818e+02  | 1.303149e+02  |
| 37 | 9.160964e+02  | 3.235037e+02  | -1.498293e+03 |
| 38 | -6.178147e+03 | -1.762902e+03 | -4.779805e+03 |
| 39 | 4.562529e+03  | 4.402348e+03  | 2.937478e+03  |
| 40 | 4.420451e+02  | -1.334888e+03 | -5.686680e+02 |
| 41 | -2.339927e+02 | -1.180834e+03 | 2.252664e+03  |
| 42 | 1.382983e+03  | -1.185323e+01 | -8.253757e+02 |
| 43 | -4.430889e+02 | 1.197400e+03  | 4.876323e+02  |
| 44 | 5.524046e+03  | 2.647738e+03  | -5.446748e+03 |
| 45 | -3.767036e+02 | -2.772078e+02 | -6.633251e+01 |
| 46 | -4.342738e+03 | 4.745011e+03  | 2.925528e+03  |
| 47 | -1.258481e+03 | -1.831885e+03 | 8.961730e+02  |
| 48 | -7.596825e+03 | 2.338569e+03  | 1.745268e+03  |
| 49 | -3.247701e+01 | 4.006791e+03  | -3.425206e+03 |
| 50 | 9.462809e+03  | 1.978157e+03  | 1.428984e+03  |
| 51 | 5.787716e+02  | -2.174107e+02 | -1.299913e+02 |
| 52 | -2.948944e+03 | 1.609345e+03  | 2.403786e+02  |
| 53 | -8.279017e+03 | -2.096194e+03 | -7.945198e+03 |
| 54 | 2.847698e+03  | -2.034131e+02 | -8.544896e+02 |
| 55 | 8.206367e+02  | 6.155777e+01  | -8.378178e+02 |
| 56 | -8.319207e+03 | -5.538660e+03 | 5.217609e+03  |
| 57 | 1.154145e+03  | 5.842965e+02  | 2.787404e+02  |
| 58 | 7.352142e+03  | -4.336982e+03 | -8.740110e+02 |
| 59 | 1.577340e+03  | 4.694462e+02  | 1.261151e+03  |
| 60 | -1.805028e+03 | 2.185923e+03  | -2.321664e+03 |
| 61 | 6.093403e+03  | 2.394719e+03  | 4.659454e+02  |
| 62 | -1.030329e+04 | -4.940548e+02 | -5.864813e+03 |
| 63 | -9.748528e+02 | 1.179411e+03  | 4.347416e+02  |
| 64 | -3.582740e+03 | 1.314887e+03  | -9.178191e+02 |
| 65 | 7.979788e+03  | 1.784964e+03  | -5.955519e+03 |
| 66 | -2.810044e+02 | 1.336219e+03  | 4.604591e+02  |
| 67 | 4.145480e+03  | -6.876226e+03 | 3.104911e+03  |

trajectory 18

| atom | VX            | VY            | VZ            |
|------|---------------|---------------|---------------|
| 1    | 1.572998e+02  | -4.300112e+02 | -9.293035e+01 |
| 2    | -2.763120e+02 | 9.179913e+02  | -8.250272e+02 |
| 3    | 1.226454e+03  | 1.157023e+03  | 1.267527e+03  |
| 4    | -5.692775e+01 | 7.543769e+01  | -4.440170e+02 |
| 5    | 1.625649e+03  | -9.775684e+02 | 5.109621e+02  |
| 6    | 1.038729e+03  | 3.008087e+03  | 4.580633e+02  |

|    |               |               |               |
|----|---------------|---------------|---------------|
| 7  | 5.366265e+03  | -2.187991e+03 | -1.560559e+03 |
| 8  | -5.466647e+03 | -7.151884e+03 | -4.305119e+03 |
| 9  | 4.173404e+02  | -3.252440e+02 | -9.740337e+02 |
| 10 | 4.370946e+02  | -1.029635e+03 | -5.503205e+02 |
| 11 | 2.022983e+03  | 6.883576e+02  | 1.707706e+02  |
| 12 | -2.279687e+02 | -2.438200e+03 | 2.812234e+03  |
| 13 | 2.438265e+03  | 2.590687e+03  | -6.005198e+03 |
| 14 | -7.331993e+02 | 3.928048e+02  | 9.201317e+02  |
| 15 | -7.362486e+02 | 8.955198e+02  | 3.245114e+01  |
| 16 | 5.502843e+01  | 1.714467e+02  | -3.226293e+02 |
| 17 | 6.695411e+01  | 1.850162e+02  | -8.078026e+01 |
| 18 | -2.690224e+02 | 1.458576e+02  | -3.859595e+01 |
| 19 | 1.732132e+03  | -9.874531e+02 | 1.459450e+03  |
| 20 | -6.360417e+01 | 2.475781e+02  | -7.157327e+02 |
| 21 | -7.696160e+02 | -1.502019e+03 | 2.335947e+02  |
| 22 | 6.043827e+02  | 1.999313e+03  | -1.428351e+03 |
| 23 | -9.505380e+02 | -8.850177e+02 | 8.383735e+02  |
| 24 | -3.583155e+02 | 2.285047e+02  | -6.515906e+01 |
| 25 | -1.512175e+03 | 1.033162e+02  | 2.227128e+02  |
| 26 | -6.203286e+02 | -1.176631e+02 | 1.076890e+03  |
| 27 | 8.102879e+02  | 1.001044e+03  | -6.133113e+02 |
| 28 | -1.132691e+03 | -3.150101e+02 | 7.305643e+02  |
| 29 | -3.315374e+01 | -9.628251e+02 | 1.889347e+02  |
| 30 | 2.781729e+02  | 2.074699e+02  | -1.047731e+03 |
| 31 | 2.191265e+03  | 8.004093e+03  | 2.866249e+03  |
| 32 | -3.388922e+03 | 3.980661e+03  | 3.224996e+03  |
| 33 | -7.212478e+02 | -1.882508e+03 | 9.272081e+03  |
| 34 | 5.267131e+03  | 2.731871e+03  | -1.089509e+04 |
| 35 | -6.583853e+02 | -1.461899e+02 | 1.074188e+03  |
| 36 | 5.287689e+03  | 5.658478e+03  | -9.357668e+02 |
| 37 | -3.877418e+01 | 8.946394e+02  | 1.729372e+02  |
| 38 | -6.155804e+03 | 2.251237e+03  | -5.668918e+03 |
| 39 | -3.499969e+03 | 1.171604e+03  | 2.532075e+03  |
| 40 | -2.202362e+02 | 3.635214e+02  | -3.865324e+02 |
| 41 | -9.321913e+02 | 4.697514e+02  | 2.311540e+02  |
| 42 | 4.207856e+02  | -9.730333e+02 | 1.137807e+03  |
| 43 | -1.490799e+03 | 2.146612e+00  | 4.255279e+02  |
| 44 | -1.060398e+03 | -4.680093e+03 | 6.288002e+03  |
| 45 | -8.616803e+02 | 5.747730e+02  | -6.221095e+02 |
| 46 | -7.855793e+03 | 1.096821e+04  | -2.071403e+02 |
| 47 | 9.621916e+02  | -1.331179e+03 | -9.304173e+02 |
| 48 | 2.762986e+03  | 1.150589e+03  | -3.092397e+03 |
| 49 | 4.063855e+03  | 2.590526e+02  | 2.132472e+03  |
| 50 | 7.492019e+03  | 3.435923e+03  | 2.000589e+03  |
| 51 | 4.186328e+02  | -4.136321e+02 | 6.407591e+02  |
| 52 | 6.846771e+02  | -1.770688e+03 | 1.584354e+03  |

|    |               |               |               |
|----|---------------|---------------|---------------|
| 53 | -1.147729e+04 | -2.331085e+03 | -1.007169e+03 |
| 54 | -3.714900e+03 | -1.681870e+03 | 2.192327e+03  |
| 55 | -4.326622e+02 | -1.077001e+02 | -3.479269e+02 |
| 56 | -7.632228e+02 | 2.504485e+03  | -1.003864e+04 |
| 57 | -5.169835e+03 | 1.033247e+04  | -2.232876e+03 |
| 58 | 5.845154e+03  | -1.309917e+03 | -1.054969e+03 |
| 59 | 1.286647e+03  | -1.814319e+03 | -1.381304e+03 |
| 60 | -5.446954e+01 | -3.814617e+02 | 5.723688e+03  |
| 61 | 8.835953e+02  | 2.530285e+03  | 1.323426e+03  |
| 62 | -9.690160e+03 | -1.318035e+02 | -4.372178e+03 |
| 63 | -2.181264e+02 | 6.897323e+02  | 1.300368e+03  |
| 64 | 1.381211e+02  | 1.154873e+03  | 4.545605e+03  |
| 65 | -2.940154e+03 | 2.489508e+02  | 4.440145e+03  |
| 66 | 1.154078e+04  | -1.045457e+02 | -9.258974e+02 |
| 67 | -1.640561e+03 | 3.165077e+03  | -6.512271e+03 |

trajectory 19

| atom | VX            | VY            | VZ            |
|------|---------------|---------------|---------------|
| 1    | -3.203519e+02 | 2.345542e+02  | 2.074682e+02  |
| 2    | 1.609299e+03  | 6.083556e+02  | 3.039103e+02  |
| 3    | -7.906666e+02 | -1.662092e+03 | -1.254261e+03 |
| 4    | -7.042727e+02 | -4.979538e+02 | 3.547680e+02  |
| 5    | -1.844785e+02 | 5.773202e+02  | -3.320377e+02 |
| 6    | 9.559213e+02  | 1.820228e+03  | -2.189216e+03 |
| 7    | 1.671296e+03  | -9.009289e+03 | -2.676104e+03 |
| 8    | 3.191926e+03  | 4.143895e+03  | 4.456434e+03  |
| 9    | 2.426207e+01  | 8.017431e+02  | 5.961118e+02  |
| 10   | -7.847027e+02 | 1.949472e+02  | 2.175168e+02  |
| 11   | -9.714151e+02 | -2.259710e+02 | 9.515770e+02  |
| 12   | 6.903522e+03  | -2.097481e+02 | -2.058650e+03 |
| 13   | 6.093344e+03  | -6.812213e+02 | -5.396398e+03 |
| 14   | -1.019863e+02 | 4.067447e+02  | 1.219543e+03  |
| 15   | -4.090605e+02 | -1.847160e+03 | -1.264284e+02 |
| 16   | 1.411059e+03  | 2.365168e+03  | 8.899381e+02  |
| 17   | -6.936638e+01 | 1.640622e+02  | 4.285371e+01  |
| 18   | 1.166116e+03  | -4.200399e+02 | 6.559081e+02  |
| 19   | 2.072752e+03  | -5.776910e+02 | -1.016741e+03 |
| 20   | -1.705065e+03 | -5.493759e+02 | 3.349821e+02  |
| 21   | -3.343191e+01 | 3.836109e+02  | -6.785221e+02 |
| 22   | -5.764044e+02 | -1.334549e+03 | -7.042828e+02 |
| 23   | 1.964752e+02  | 2.969317e+02  | -2.451980e+02 |
| 24   | -3.501952e+02 | 3.025197e+02  | -1.412832e+03 |
| 25   | -3.605274e+02 | 2.686590e+02  | 1.118088e+02  |
| 26   | -3.427165e+02 | -1.408560e+02 | 1.695143e+02  |



|    |               |               |               |
|----|---------------|---------------|---------------|
| 27 | -8.054304e+02 | -3.235636e+02 | 2.579607e+02  |
| 28 | -1.836072e+03 | 9.954643e+02  | 4.805025e+02  |
| 29 | -2.323413e+01 | -1.688155e+03 | -6.642198e+02 |
| 30 | -1.136470e+02 | 1.628996e+02  | -2.491723e+03 |
| 31 | -4.656685e+03 | -3.723259e+03 | 8.164077e+03  |
| 32 | 3.964315e+03  | -3.686513e+03 | 5.127382e+03  |
| 33 | 3.248845e+03  | -1.616047e+02 | 2.125063e+03  |
| 34 | 6.202982e+03  | 4.376062e+03  | -7.107375e+03 |
| 35 | -3.699808e+02 | -1.266086e+03 | 1.955648e+02  |
| 36 | 3.632473e+03  | -6.863696e+02 | -3.664920e+02 |
| 37 | 2.371737e+03  | 3.081478e+02  | 8.369343e+02  |
| 38 | -2.949785e+03 | 3.358505e+03  | -2.831636e+02 |
| 39 | 2.508235e+02  | -6.276455e+03 | -7.458263e+03 |
| 40 | 3.687998e+02  | 5.821237e+02  | -1.756137e+03 |
| 41 | 6.864243e+02  | -8.202399e+00 | -5.416768e+02 |
| 42 | 1.507044e+03  | -8.696932e+02 | 6.716880e+02  |
| 43 | 2.986200e+02  | -7.694101e+02 | 1.132465e+03  |
| 44 | 6.595146e+03  | 6.241035e+03  | -5.164958e+03 |
| 45 | -1.423234e+03 | -3.927662e+02 | -4.997709e+01 |
| 46 | -2.274344e+03 | 3.153851e+02  | -1.148219e+03 |
| 47 | -5.956928e+00 | 2.180866e+03  | 8.561227e+02  |
| 48 | 4.895226e+03  | -8.466007e+01 | -4.584674e+03 |
| 49 | 3.240536e+03  | -2.396127e+03 | -3.552753e+03 |
| 50 | 8.322676e+03  | -2.029417e+03 | 7.217031e+03  |
| 51 | 2.078586e+02  | -1.582694e+03 | 8.287777e+01  |
| 52 | -1.082969e+03 | 4.609309e+03  | -3.337063e+03 |
| 53 | 4.181799e+03  | 5.520225e+02  | -3.007786e+03 |
| 54 | -6.727898e+03 | 6.144076e+03  | -3.349221e+03 |
| 55 | -1.334339e+03 | -8.075209e+02 | -2.880270e+02 |
| 56 | 3.023136e+03  | 2.310115e+03  | 5.297455e+03  |
| 57 | 2.691541e+03  | -1.014811e+03 | 4.522548e+03  |
| 58 | 5.972094e+03  | 2.930184e+03  | 4.877329e+03  |
| 59 | -4.065993e+02 | 1.309264e+03  | -3.309741e+02 |
| 60 | -5.901731e+03 | -7.020798e+03 | 5.932112e+03  |
| 61 | -6.030677e+02 | -1.403043e+03 | 2.806615e+02  |
| 62 | 2.440664e+03  | -2.482471e+03 | 1.419822e+02  |
| 63 | 1.244277e+03  | 3.625981e+02  | 5.484664e+02  |
| 64 | -2.816101e+03 | -8.330076e+03 | -7.667535e+03 |
| 65 | -5.144211e+03 | -5.845075e+03 | -2.394016e+03 |
| 66 | 7.965524e+02  | -3.168577e+03 | -5.874574e+03 |
| 67 | 1.008281e+03  | 3.025116e+03  | -1.350232e+03 |

trajectory 20  
atom VX

VY

VZ

|    |               |               |               |
|----|---------------|---------------|---------------|
| 1  | -8.372845e+01 | 2.953840e+01  | 3.279592e+01  |
| 2  | 5.954228e+02  | 6.173999e+02  | 2.452683e+02  |
| 3  | -4.312354e+02 | -1.762862e+03 | -1.126947e+03 |
| 4  | -1.324842e+02 | -6.145672e+02 | 2.986828e+02  |
| 5  | 2.632973e+03  | -9.578816e+02 | -1.277741e+03 |
| 6  | -3.710554e+03 | 3.865836e+03  | 7.264847e+02  |
| 7  | 1.255720e+03  | 2.626331e+03  | 7.147658e+03  |
| 8  | -4.285135e+03 | -3.150495e+03 | -1.063466e+03 |
| 9  | -1.420560e+01 | -5.685716e+02 | 8.823971e+02  |
| 10 | -4.668247e+02 | -2.067965e+02 | 7.755225e+02  |
| 11 | 1.025386e+03  | 9.436899e+02  | 1.126539e+02  |
| 12 | -6.236258e+03 | 4.524452e+03  | 3.835639e+03  |
| 13 | 2.853735e+03  | 7.676001e+02  | -4.923191e+03 |
| 14 | 5.816888e+02  | -4.855319e+02 | -2.243477e+02 |
| 15 | 1.744279e+03  | 2.490096e+02  | 1.493434e+03  |
| 16 | -4.018412e+02 | -3.611899e+02 | -7.512664e+02 |
| 17 | -2.085131e+02 | -3.717991e+02 | -1.249416e+02 |
| 18 | -1.183632e+03 | -1.017851e+03 | 5.065187e+02  |
| 19 | 1.059550e+03  | 2.145582e+03  | -1.021138e+03 |
| 20 | 1.902675e+02  | 2.642496e+02  | 6.699380e+02  |
| 21 | 5.571304e+00  | 8.010340e+02  | 1.191975e+03  |
| 22 | -3.317122e+02 | -7.829967e+02 | -1.349108e+03 |
| 23 | -1.348803e+02 | 1.374552e+01  | -6.842062e+02 |
| 24 | 5.514314e+02  | 1.672831e+03  | -6.760088e+01 |
| 25 | -8.221830e+02 | 9.875048e+02  | 1.200012e+03  |
| 26 | -8.542847e+02 | -1.303193e+03 | -1.088807e+03 |
| 27 | -8.201282e+02 | -9.895524e+02 | 2.034975e+03  |
| 28 | -7.682793e+02 | 8.166252e+02  | 1.873100e+02  |
| 29 | 1.337068e+03  | -9.817555e+02 | -1.400666e+03 |
| 30 | -1.639689e+03 | 1.439597e+03  | -1.017561e+03 |
| 31 | 6.210958e+03  | 3.234037e+03  | 1.048610e+03  |
| 32 | 7.384064e+03  | 4.041026e+02  | 5.185033e+02  |
| 33 | -8.022005e+03 | 1.241301e+03  | -2.722322e+03 |
| 34 | 7.179338e+03  | 1.602036e+02  | 3.570201e+02  |
| 35 | 2.952177e+02  | 1.413575e+03  | 7.707875e+02  |
| 36 | -3.662391e+03 | -7.516891e+03 | 2.020103e+03  |
| 37 | -1.569108e+02 | -2.556784e+02 | 1.062681e+03  |
| 38 | -2.171655e+03 | -5.360820e+03 | -6.696726e+03 |
| 39 | -2.456895e+03 | -1.489590e+03 | 5.319752e+03  |
| 40 | -8.387060e+02 | -5.486616e+02 | -2.825544e+02 |
| 41 | 8.355115e+02  | 8.692791e+02  | 5.666172e+02  |
| 42 | -3.887942e+02 | 1.750604e+02  | 5.100311e+02  |
| 43 | 9.691326e+02  | -6.019937e+02 | -4.316332e+02 |
| 44 | 8.647544e+02  | -2.119125e+01 | 3.781282e+03  |
| 45 | 1.492261e+03  | -4.150620e+02 | -1.850847e+03 |
| 46 | -2.732698e+03 | 1.673286e+03  | -6.754781e+03 |

|    |               |               |               |
|----|---------------|---------------|---------------|
| 47 | -1.198480e+03 | 4.230674e+02  | 1.058800e+03  |
| 48 | -4.056057e+03 | 5.312698e+03  | -3.905356e+03 |
| 49 | 3.827559e+02  | 6.783391e+03  | -2.219233e+03 |
| 50 | 8.283216e+03  | -5.723166e+03 | 2.186307e+02  |
| 51 | -1.207968e+02 | 3.274079e+02  | 8.153794e+02  |
| 52 | -7.637706e+02 | -4.483902e+03 | 7.079658e+03  |
| 53 | -3.493933e+03 | 2.511041e+03  | -1.454563e+03 |
| 54 | 3.250250e+02  | 5.706061e+03  | -7.812190e+03 |
| 55 | -1.267721e+02 | 1.860825e+02  | 7.962868e+02  |
| 56 | 3.010734e+03  | 8.063528e+03  | -8.518189e+02 |
| 57 | 4.475048e+03  | -6.717719e+03 | -3.677425e+03 |
| 58 | 3.289632e+03  | -9.054378e+02 | 4.266372e+03  |
| 59 | 6.148738e+01  | -5.477314e+01 | -7.833534e+02 |
| 60 | 7.059453e+03  | 8.328255e+03  | 1.695027e+03  |
| 61 | -1.810113e+02 | 1.898171e+03  | -1.436115e+03 |
| 62 | -2.981459e+03 | -2.095195e+03 | 2.589856e+03  |
| 63 | -4.870179e+02 | 2.314999e+03  | -8.382552e+02 |
| 64 | -1.059384e+03 | -7.745119e+03 | -5.246381e+03 |
| 65 | -7.770582e+01 | -3.549872e+03 | 2.550962e+03  |
| 66 | -1.354406e+03 | -6.297792e+03 | 1.357098e+03  |
| 67 | 5.510819e+03  | -5.449164e+03 | -9.572873e+02 |

trajectory 21

| atom | VX            | VY            | VZ            |
|------|---------------|---------------|---------------|
| 1    | -3.784432e+02 | -2.168055e+02 | 2.345525e+02  |
| 2    | -9.309179e+01 | -9.064383e+02 | 2.542081e+03  |
| 3    | -4.820623e+02 | -4.684280e+02 | -1.620820e+03 |
| 4    | 1.634255e+03  | -9.103143e+01 | -2.268728e+02 |
| 5    | -5.056452e+02 | -8.472482e+01 | 1.268784e+03  |
| 6    | -4.728176e+02 | -1.533320e+03 | -4.234984e+03 |
| 7    | 4.338639e+02  | -1.382351e+03 | -8.691780e+03 |
| 8    | 3.705998e+03  | 9.457141e+03  | -6.935650e+01 |
| 9    | -1.309320e+03 | 3.362972e+02  | 2.879694e+02  |
| 10   | 1.682732e+02  | 1.222539e+03  | -6.071664e+02 |
| 11   | -1.455524e+03 | 7.670960e+02  | 1.136634e+03  |
| 12   | 3.820027e+03  | 1.953094e+01  | -1.547814e+03 |
| 13   | -1.056811e+03 | -6.088861e+03 | 2.169825e+03  |
| 14   | -5.713025e+02 | -5.483564e+02 | -5.894057e+02 |
| 15   | -2.846852e+02 | 2.128041e+03  | 8.662710e+02  |
| 16   | -3.294943e+02 | -1.595105e+03 | -1.969132e+03 |
| 17   | -9.301653e+01 | -1.384530e+02 | 9.688445e+01  |
| 18   | -1.173971e+03 | 4.288934e+02  | 1.648801e+02  |
| 19   | 1.007940e+03  | -2.068420e+02 | -5.947286e+01 |
| 20   | 8.911626e+01  | 7.387968e+01  | 3.856318e+02  |

|    |               |               |               |
|----|---------------|---------------|---------------|
| 21 | -4.335750e+02 | 1.855100e+03  | -2.919015e+01 |
| 22 | 3.518236e+02  | -4.719544e+01 | -1.063632e+03 |
| 23 | -2.731382e+01 | 1.362117e+02  | 7.771511e+02  |
| 24 | -5.735319e+02 | 6.348576e+01  | 3.654577e+02  |
| 25 | 2.201746e+02  | 6.811863e+01  | -3.941377e+01 |
| 26 | 5.552446e+02  | 3.886683e+02  | -1.328850e+02 |
| 27 | 3.841804e+02  | -8.991107e+02 | -3.214910e+02 |
| 28 | 1.232074e+03  | 5.498811e+02  | -1.579949e+03 |
| 29 | -7.054060e+02 | -7.310503e+01 | -7.667878e+01 |
| 30 | 7.034903e+02  | 2.314858e+02  | -4.884014e+02 |
| 31 | 4.981225e+03  | 8.272583e+03  | -4.786896e+03 |
| 32 | 1.389962e+03  | 1.123074e+03  | -4.376196e+03 |
| 33 | -4.143776e+01 | 1.165339e+03  | 3.006711e+03  |
| 34 | -6.206814e+03 | 5.175696e+02  | -2.433347e+03 |
| 35 | -1.541484e+03 | -6.152623e+01 | 3.882299e+02  |
| 36 | 2.597344e+03  | 8.387183e+03  | -5.895701e+02 |
| 37 | 2.587915e+02  | -1.757293e+02 | -6.112063e+02 |
| 38 | -5.141614e+03 | -1.053228e+02 | -6.335975e+03 |
| 39 | 3.293383e+03  | -2.839617e+03 | 9.488263e+03  |
| 40 | 1.608685e+03  | -1.477049e+03 | 7.998386e+02  |
| 41 | -4.126365e+02 | -1.843672e+02 | 1.889641e+02  |
| 42 | -2.011316e+02 | 1.436986e+03  | -1.021224e+03 |
| 43 | 3.296062e+02  | -1.475438e+03 | -5.163282e+02 |
| 44 | 5.049243e+03  | 1.183536e+03  | 2.451910e+03  |
| 45 | 1.135029e+03  | 1.493647e+02  | 2.157101e+02  |
| 46 | 3.338601e+03  | -2.189433e+03 | -1.186231e+02 |
| 47 | 2.614067e+03  | 4.656183e+02  | -9.702123e+02 |
| 48 | 2.559481e+03  | -5.842501e+03 | 6.583961e+03  |
| 49 | -1.159615e+03 | 4.366861e+03  | 4.946225e+03  |
| 50 | -7.124558e+03 | 6.777617e+03  | -2.489216e+03 |
| 51 | -8.608096e+02 | 5.772851e+02  | -1.894822e+02 |
| 52 | 8.407613e+03  | -1.295098e+03 | -4.022108e+03 |
| 53 | 3.271788e+03  | -5.459605e+03 | 5.357255e+03  |
| 54 | 3.607523e+03  | -4.806461e+03 | 4.376136e+03  |
| 55 | 6.027915e+02  | 1.296228e+03  | 4.944796e+02  |
| 56 | -3.261106e+03 | -7.614043e+03 | 2.250735e+03  |
| 57 | -8.310209e+02 | -8.654464e+03 | -2.072454e+03 |
| 58 | -4.532204e+02 | -3.312306e+03 | 9.532389e+01  |
| 59 | 2.363222e+02  | 2.960377e+02  | -1.200829e+03 |
| 60 | 1.350721e+03  | -4.408444e+03 | 4.409567e+03  |
| 61 | 6.302238e+03  | -2.588515e+03 | 6.474795e+03  |
| 62 | -4.120166e+03 | -5.639741e+03 | -3.267445e+03 |
| 63 | 6.782758e+02  | 1.828124e+03  | 3.911936e+02  |
| 64 | 1.440769e+03  | -1.863535e+03 | 2.269230e+03  |
| 65 | 4.145543e+03  | 1.513347e+03  | -2.177037e+03 |
| 66 | -3.827186e+03 | -1.048618e+04 | -2.496736e+02 |

67 -3.286965e+03 -6.085363e+03 -2.641809e+02

trajectory 22

| atom | VX            | VY            | VZ            |
|------|---------------|---------------|---------------|
| 1    | -2.214460e+02 | -1.036304e+02 | -3.216019e+02 |
| 2    | -3.421271e+02 | -2.938840e+02 | -8.994553e+01 |
| 3    | 7.460020e+02  | -1.386790e+02 | 1.182620e+03  |
| 4    | -5.158243e+02 | 2.600690e+03  | -5.454784e+02 |
| 5    | -7.090785e+02 | -1.238430e+03 | -7.772970e+02 |
| 6    | -1.154477e+03 | 1.534845e+03  | 2.169932e+03  |
| 7    | 2.727181e+03  | 1.666312e+03  | 3.010108e+03  |
| 8    | 9.350078e+03  | 5.159269e+03  | 1.537462e+02  |
| 9    | 1.406814e+01  | -7.498593e+02 | -8.091452e+02 |
| 10   | -2.100840e+02 | 9.052306e+02  | -8.523468e+02 |
| 11   | -7.957296e+02 | 1.237285e+03  | -8.563123e+02 |
| 12   | -9.985476e+02 | -6.876571e+03 | 1.180995e+03  |
| 13   | -5.953254e+03 | -2.196215e+02 | 3.666840e+03  |
| 14   | 1.811814e+02  | 4.082976e+02  | -1.764468e+02 |
| 15   | 1.845078e+02  | -6.894052e+02 | 1.107589e+02  |
| 16   | -2.601400e+02 | -7.003042e+02 | -1.877783e+02 |
| 17   | 4.057310e+02  | -2.161400e+02 | 1.033286e+02  |
| 18   | -5.064725e+02 | 9.739111e+02  | -3.616864e+02 |
| 19   | 8.588876e+02  | -4.553247e+02 | 1.597873e+03  |
| 20   | -4.888836e+02 | 1.294204e+02  | -5.258564e+02 |
| 21   | -1.156757e+03 | -9.528928e+02 | 7.486056e+02  |
| 22   | 1.267698e+03  | 1.977946e+03  | -1.742108e+03 |
| 23   | 2.628968e+02  | -1.914591e+02 | 4.389621e+01  |
| 24   | -3.368972e+02 | -3.388572e+01 | -5.996170e+02 |
| 25   | -1.153477e+03 | 8.362416e+02  | 1.668316e+03  |
| 26   | 2.888871e+02  | 1.836315e+02  | 1.669415e+02  |
| 27   | 9.731834e+02  | 3.331891e+02  | 1.406063e+03  |
| 28   | 2.958394e+03  | 4.731705e+02  | -1.009954e+03 |
| 29   | 1.910050e+02  | 3.743352e+02  | -5.368036e+02 |
| 30   | -6.738651e+02 | 9.910591e+01  | 3.495165e+02  |
| 31   | 4.649660e+03  | 6.084377e+03  | -3.460277e+03 |
| 32   | -4.456100e+03 | 4.959618e+03  | -5.546820e+03 |
| 33   | -7.748178e+02 | -6.186231e+03 | 4.027415e+02  |
| 34   | -6.449352e+03 | 1.055052e+03  | 2.274410e+03  |
| 35   | -1.161609e+03 | -1.549116e+03 | 2.333660e+03  |
| 36   | -4.157615e+03 | -5.783045e+03 | -1.831088e+03 |
| 37   | 1.663112e+03  | 9.707030e+02  | -7.696310e+02 |
| 38   | -5.977735e+03 | 1.835087e+03  | -5.112983e+03 |
| 39   | -3.328645e+03 | 7.926510e+02  | 8.108633e+02  |
| 40   | -3.973802e+02 | -1.283445e+01 | 6.712928e+02  |

|    |               |               |               |
|----|---------------|---------------|---------------|
| 41 | 1.483629e+02  | -9.237241e+02 | 7.457239e+02  |
| 42 | 6.195434e+02  | -2.468367e+02 | -1.442400e+03 |
| 43 | -1.668068e+03 | -1.320048e+03 | -1.391494e+01 |
| 44 | -1.369546e+03 | -1.166904e+03 | 8.904506e+01  |
| 45 | 1.554404e+03  | -1.176066e+02 | 7.989992e+01  |
| 46 | -1.137770e+03 | 4.157528e+03  | 1.626234e+03  |
| 47 | 3.772267e+02  | -5.247249e+01 | 1.310170e+03  |
| 48 | -8.027395e+03 | 1.131539e+04  | -3.474836e+03 |
| 49 | -1.840107e+03 | 2.182880e+03  | 4.899077e+03  |
| 50 | 3.042934e+03  | 1.204613e+02  | -3.982235e+01 |
| 51 | 6.142182e+00  | -7.719441e+02 | 6.147122e+02  |
| 52 | -3.578153e+03 | 4.314417e+03  | 4.414105e+01  |
| 53 | -5.551116e+03 | -9.846095e+03 | -6.090099e+03 |
| 54 | -3.112720e+03 | -7.225656e+02 | 5.364960e+03  |
| 55 | 1.059246e+03  | -2.249222e+02 | 1.417187e+02  |
| 56 | -6.894506e+02 | -4.971331e+02 | 2.981636e+03  |
| 57 | -4.407265e+03 | 9.751331e+03  | -1.769315e+03 |
| 58 | 1.072765e+02  | -5.093234e+03 | 2.893598e+03  |
| 59 | -9.777403e+02 | -3.167476e+02 | -6.830591e+02 |
| 60 | 6.869318e+03  | 2.402277e+03  | -3.764704e+03 |
| 61 | 6.261707e+03  | -5.039810e+03 | 3.342324e+03  |
| 62 | 2.902356e+03  | -5.010569e+03 | -2.589162e+03 |
| 63 | 1.292022e+02  | 7.406415e+02  | 5.492363e+02  |
| 64 | -3.654427e+03 | 9.308643e+03  | 1.378399e+03  |
| 65 | -3.272282e+03 | -1.228034e+03 | 1.795142e+03  |
| 66 | -6.412860e+03 | -4.954813e+03 | 3.940293e+03  |
| 67 | 6.196907e+03  | -3.001191e+03 | 2.106865e+03  |

trajectory 23

| atom | VX            | VY            | VZ            |
|------|---------------|---------------|---------------|
| 1    | 2.944577e+02  | 1.490498e+02  | 4.884849e+02  |
| 2    | 9.222386e+02  | 5.855164e+02  | 1.282367e+03  |
| 3    | -6.635332e+02 | -1.477459e+02 | 3.988515e+02  |
| 4    | -5.727705e+02 | -7.710358e+02 | 7.119533e+01  |
| 5    | 6.299201e+01  | 5.661526e+02  | -1.241183e+03 |
| 6    | -2.600776e+03 | -2.192978e+03 | -1.408426e+03 |
| 7    | 4.064078e+03  | 5.921783e+03  | 8.483781e+03  |
| 8    | -2.669511e+03 | -7.303335e+03 | -3.849368e+03 |
| 9    | -1.138009e+02 | -6.533661e+02 | -2.024421e+03 |
| 10   | 1.225176e+02  | 2.389047e+01  | 1.066245e+03  |
| 11   | -1.863935e+03 | -3.201523e+02 | 1.349287e+02  |
| 12   | 1.277310e+03  | 6.332288e+03  | -2.358029e+03 |
| 13   | 5.526845e+03  | 1.119615e+03  | -3.725120e+03 |
| 14   | -6.952468e+02 | 1.075351e+02  | 2.806802e+02  |

|    |               |               |               |
|----|---------------|---------------|---------------|
| 15 | 4.860100e+02  | -5.443929e+02 | -5.471954e+02 |
| 16 | -2.544313e+02 | -1.701532e+03 | -1.212913e+03 |
| 17 | 1.670576e+02  | 7.670621e+01  | -1.824405e+02 |
| 18 | -9.538913e+02 | -5.807710e+02 | -5.931223e+02 |
| 19 | 8.444848e+02  | 1.058703e+03  | 1.256799e+03  |
| 20 | 2.101040e+02  | -5.002827e+02 | -2.939423e+02 |
| 21 | 1.404532e+03  | -3.611643e+02 | 9.161285e+02  |
| 22 | -1.139584e+02 | 7.931720e+02  | 4.844022e+01  |
| 23 | 3.591273e+02  | -2.392051e+02 | 9.986468e+01  |
| 24 | -1.681209e+03 | 4.919819e+02  | 3.231085e+02  |
| 25 | -8.005184e+02 | -7.929942e+02 | -2.748919e+02 |
| 26 | 4.982905e+02  | 1.212797e+03  | 1.191585e+01  |
| 27 | 1.174037e+03  | -6.828546e+02 | 6.019997e+02  |
| 28 | -8.303170e+01 | -5.379247e+02 | -1.394214e+02 |
| 29 | -4.117735e+02 | -1.260674e+03 | 1.094294e+03  |
| 30 | -3.394450e+02 | 7.931883e+02  | -9.595546e+02 |
| 31 | -3.927930e+03 | -6.069549e+03 | 3.009156e+03  |
| 32 | -4.489360e+03 | 7.818379e+03  | -3.759639e+02 |
| 33 | 5.034317e+03  | -4.743239e+03 | 2.877302e+03  |
| 34 | -3.724979e+03 | 6.527439e+03  | 1.347657e+03  |
| 35 | 1.433920e+03  | 7.933829e+02  | 3.599373e+01  |
| 36 | -1.505356e+03 | -1.529837e+03 | -2.403685e+03 |
| 37 | -9.527307e+01 | 7.441229e+02  | 1.229678e+02  |
| 38 | 3.272861e+03  | 3.772757e+03  | 7.293780e+03  |
| 39 | 5.477546e+03  | 4.039653e+03  | -3.397612e+03 |
| 40 | 4.787949e+02  | 7.312546e+02  | -2.045676e+03 |
| 41 | 5.760977e+02  | -2.333272e+03 | 2.448078e+03  |
| 42 | 8.203100e+02  | 2.982583e+01  | 5.001737e+02  |
| 43 | -3.484889e+01 | -3.109798e+02 | 8.288843e+02  |
| 44 | 5.427325e+03  | 6.889224e+03  | -3.813196e+03 |
| 45 | 6.526083e+02  | 1.597378e+03  | -1.210659e+03 |
| 46 | -1.207393e+04 | -5.753687e+03 | -3.281340e+03 |
| 47 | -1.735869e+03 | -6.515013e+02 | -5.750380e+02 |
| 48 | -6.919419e+03 | 4.197910e+03  | -4.810683e+03 |
| 49 | 5.837253e+02  | -1.933503e+03 | -1.725989e+02 |
| 50 | -8.593664e+02 | 1.163315e+03  | 1.207874e+03  |
| 51 | -9.983903e+02 | -1.118694e+03 | 1.038399e+03  |
| 52 | 2.477654e+02  | 2.552816e+02  | -3.350108e+03 |
| 53 | 6.020562e+03  | -6.405717e+02 | -5.236321e+03 |
| 54 | -1.898580e+03 | 8.171205e+03  | -3.291493e+03 |
| 55 | -4.440245e+02 | 6.616244e+02  | 2.278172e+02  |
| 56 | 3.175624e+03  | 1.407416e+03  | 2.681713e+02  |
| 57 | -7.407672e+02 | -9.293528e+03 | -3.613054e+03 |
| 58 | 2.441872e+02  | 1.073531e+03  | 6.700327e+03  |
| 59 | -4.889249e+02 | 1.626533e+03  | -1.105968e+03 |
| 60 | -4.614822e+02 | -2.342702e+03 | 6.191322e+03  |

|    |               |               |               |
|----|---------------|---------------|---------------|
| 61 | 6.151227e+03  | -5.837965e+03 | 4.001032e+03  |
| 62 | -4.506027e+03 | -2.358762e+03 | -2.352362e+03 |
| 63 | -7.631450e+02 | 9.011435e+02  | -8.692959e+02 |
| 64 | 1.699283e+03  | -3.943988e+03 | 4.054687e+03  |
| 65 | 2.914659e+03  | -4.168171e+03 | -4.036579e+03 |
| 66 | -8.499647e+03 | -1.983424e+03 | -4.311977e+03 |
| 67 | 1.719151e+02  | -3.749676e+02 | -7.674296e+03 |

trajectory 24

| atom | VX            | VY            | VZ            |
|------|---------------|---------------|---------------|
| 1    | 1.755540e+02  | -2.670074e+02 | 2.640712e+01  |
| 2    | 1.745882e+03  | 1.111579e+03  | 2.023743e+02  |
| 3    | 7.067589e+02  | -1.816376e+03 | -1.141628e+03 |
| 4    | 4.139117e+02  | 9.129008e+02  | 7.123879e+02  |
| 5    | 4.564485e+02  | 1.112716e+03  | 7.105946e+02  |
| 6    | -3.083802e+03 | -4.522044e+03 | -2.975087e+03 |
| 7    | -5.042700e+03 | 3.645308e+03  | 8.673395e+03  |
| 8    | -3.262286e+03 | -3.909793e+03 | -2.669415e+03 |
| 9    | 6.737097e+02  | -1.019851e+03 | 3.761530e+02  |
| 10   | -4.846736e+02 | -1.585335e+03 | 1.391306e+03  |
| 11   | -1.549536e+03 | 7.069396e+02  | -8.862165e+02 |
| 12   | 2.036301e+03  | 4.870570e+03  | -3.374252e+03 |
| 13   | 1.790627e+03  | 5.847645e+03  | -6.043121e+02 |
| 14   | 7.212102e+02  | 6.412633e+02  | -1.715665e+02 |
| 15   | -6.998361e+02 | -1.269367e+03 | 1.136607e+03  |
| 16   | -1.233795e+02 | -6.445620e+02 | -1.912604e+02 |
| 17   | -2.038393e+02 | -9.210965e+01 | -1.809805e+02 |
| 18   | 2.649647e+02  | 1.445641e+03  | 1.504313e+01  |
| 19   | 1.897442e+03  | 1.047971e+03  | 2.827613e+02  |
| 20   | -1.875703e+03 | -1.586664e+03 | 6.936443e+01  |
| 21   | 7.575952e+02  | -1.463134e+03 | 6.257600e+01  |
| 22   | -1.043353e+03 | 1.272638e+03  | -8.458770e+02 |
| 23   | -3.592523e+02 | 5.038375e+02  | -5.998505e+02 |
| 24   | -4.578682e+02 | 4.053092e-01  | 4.209417e+02  |
| 25   | 4.910449e+02  | 2.367347e+02  | -3.871651e+02 |
| 26   | -1.397743e+03 | 5.172329e+02  | -5.275871e+02 |
| 27   | -4.760293e+02 | -1.075952e+03 | -6.646376e+02 |
| 28   | 2.140017e+03  | 1.025008e+03  | 7.068523e+02  |
| 29   | -5.643762e+02 | -3.246533e+02 | 6.501616e+02  |
| 30   | 1.634412e+02  | 1.096546e+03  | -5.808954e+02 |
| 31   | 2.115562e+03  | 1.426402e+03  | -2.646803e+03 |
| 32   | 3.779192e+03  | -6.573552e+03 | 4.104912e+03  |
| 33   | 2.086060e+03  | -5.316878e+03 | 6.346234e+02  |
| 34   | 7.620993e+03  | -3.770834e+03 | 7.767005e+02  |



|    |               |               |               |
|----|---------------|---------------|---------------|
| 35 | -3.829003e+02 | 3.963495e+02  | 9.747347e+01  |
| 36 | 8.186445e+02  | 3.430249e+03  | 6.716356e+02  |
| 37 | -7.849066e+02 | 1.495602e+03  | 6.765222e+02  |
| 38 | -6.332600e+01 | 3.053375e+03  | -5.543709e+03 |
| 39 | 7.838946e+03  | -4.069820e+03 | 1.034773e+02  |
| 40 | -2.831674e+02 | -9.836062e+01 | 1.629432e+02  |
| 41 | -1.563438e+03 | -4.308914e+02 | -7.416043e+01 |
| 42 | 2.515525e+02  | 1.461499e+03  | -2.130431e+02 |
| 43 | 2.951017e+03  | -1.053009e+03 | -4.501892e+02 |
| 44 | 5.587057e+03  | 3.583065e+03  | -2.141857e+03 |
| 45 | -5.138200e+02 | -2.164085e+02 | -7.555373e+00 |
| 46 | 6.671855e+01  | -5.283950e+03 | 1.551280e+03  |
| 47 | -9.808079e+02 | 8.865366e+02  | 1.105713e+03  |
| 48 | -1.568165e+03 | 3.689235e+03  | -3.910308e+03 |
| 49 | 6.971537e+03  | 2.764978e+02  | -1.727890e+03 |
| 50 | -7.907903e+03 | 1.638466e+03  | -7.475684e+03 |
| 51 | -1.196870e+03 | 2.511095e+02  | -7.155267e+01 |
| 52 | -1.328366e+02 | -5.278725e+02 | -2.056559e+03 |
| 53 | 1.240737e+04  | -9.603504e+00 | -2.396117e+02 |
| 54 | 1.521798e+03  | 1.843565e+03  | -1.401374e+03 |
| 55 | -7.651025e+02 | -5.995978e+02 | 3.530632e+02  |
| 56 | -3.662990e+03 | 9.440452e+03  | -1.436723e+03 |
| 57 | 3.722525e+02  | -8.000801e+03 | -5.977889e+03 |
| 58 | 1.276725e+03  | 2.418411e+03  | 3.504602e+03  |
| 59 | -1.708057e+03 | 1.903053e+01  | 9.568130e+02  |
| 60 | 9.075690e+02  | -6.303923e+02 | 7.495218e+03  |
| 61 | 9.918190e+02  | 2.433714e+03  | 1.293818e+03  |
| 62 | 8.402950e+03  | -5.971668e+03 | -3.186905e+03 |
| 63 | 1.318661e+03  | 2.248603e+02  | 9.487659e+02  |
| 64 | -2.828831e+03 | -2.513370e+02 | -4.565739e+03 |
| 65 | 1.464420e+03  | -2.111719e+03 | -3.946247e+03 |
| 66 | -7.063073e+03 | -1.197677e+03 | -2.296491e+03 |
| 67 | 1.786470e+03  | 6.067900e+03  | -5.835417e+03 |

trajectory 25

| atom | VX            | VY            | VZ            |
|------|---------------|---------------|---------------|
| 1    | 1.488695e+02  | -1.270958e+02 | -1.485866e+02 |
| 2    | -1.393111e+03 | 3.317997e+01  | 8.350705e+02  |
| 3    | 1.553748e+03  | -8.293751e+02 | 2.082383e+03  |
| 4    | 2.549483e+02  | -6.362861e+02 | -1.356391e+03 |
| 5    | -2.294428e+03 | -5.616838e+02 | -4.183990e+02 |
| 6    | -5.605496e+03 | -2.802294e+03 | -4.143726e+03 |
| 7    | -4.764433e+03 | 6.573592e+02  | 1.327311e+03  |
| 8    | 7.109990e+03  | 7.189239e+03  | 1.589083e+01  |

|    |               |               |               |
|----|---------------|---------------|---------------|
| 9  | -3.452672e+02 | 3.541327e+02  | 7.598478e+02  |
| 10 | 4.128622e+02  | 1.576973e+03  | 1.213898e+03  |
| 11 | 7.103146e+02  | -2.469376e+03 | 2.084145e+01  |
| 12 | 5.429250e+02  | 7.336100e+03  | -2.049434e+03 |
| 13 | 8.013999e+01  | -5.083668e+03 | 4.836430e+03  |
| 14 | -1.178749e+03 | -3.540296e+02 | 5.820809e+01  |
| 15 | 1.782855e+03  | 2.708997e+02  | -1.407617e+03 |
| 16 | 4.801195e+02  | 6.971811e+02  | -4.055122e+02 |
| 17 | 2.489322e+02  | -2.270413e+02 | 1.523300e+02  |
| 18 | -3.904863e+02 | -4.968192e+02 | 4.756231e+01  |
| 19 | 2.017128e+02  | 2.847751e+02  | -1.792567e+03 |
| 20 | -6.564525e+02 | 1.065751e+03  | 5.358250e+02  |
| 21 | 1.985534e+02  | 1.765573e+02  | 8.571902e+02  |
| 22 | 4.352191e+02  | 8.452844e+02  | -1.166420e+03 |
| 23 | 1.960444e+02  | 8.508802e+01  | -2.893889e+02 |
| 24 | -3.708072e+02 | 5.774221e+02  | -4.599375e+02 |
| 25 | -1.282746e+03 | 1.201579e+03  | 6.484165e+02  |
| 26 | -5.313800e+01 | 4.924452e+02  | -7.950108e+02 |
| 27 | 5.855189e+02  | 3.462095e+02  | 9.010203e+01  |
| 28 | -7.294832e+02 | 3.665311e+02  | 8.018809e+02  |
| 29 | 6.092995e+02  | -9.465329e+02 | -4.728488e+02 |
| 30 | -1.204839e+03 | -3.396910e+02 | -3.781260e+02 |
| 31 | 1.612701e+03  | 1.836414e+02  | -4.775609e+03 |
| 32 | -7.290226e+03 | -4.662744e+03 | 1.722334e+02  |
| 33 | 2.776270e+02  | 8.375302e+02  | -5.378170e+03 |
| 34 | 7.881718e+03  | -1.226843e+03 | 1.107964e+03  |
| 35 | 2.182130e+03  | -5.430455e+02 | -7.428584e+02 |
| 36 | -3.447278e+03 | -2.992167e+03 | 7.595612e+03  |
| 37 | -6.204182e+02 | -2.764196e+02 | -6.956475e+02 |
| 38 | 8.885379e+02  | 3.359235e+03  | 1.444996e+03  |
| 39 | -8.419197e+03 | 1.399805e+03  | 4.079660e+03  |
| 40 | 8.041371e+02  | 1.469444e+03  | -1.459630e+03 |
| 41 | 5.801221e+02  | 4.381525e+02  | 1.323021e+03  |
| 42 | 5.130728e+02  | 2.311766e+02  | -7.353894e+01 |
| 43 | 5.780402e+02  | -1.534020e+03 | 1.534350e+02  |
| 44 | 1.628055e+02  | -2.097026e+03 | 4.969435e+03  |
| 45 | 9.782590e+02  | -3.378569e+02 | -4.633069e+02 |
| 46 | -3.714400e+03 | -3.637480e+03 | 5.946759e+03  |
| 47 | -5.055825e+02 | 5.490742e+02  | 4.825743e+01  |
| 48 | -3.806711e+03 | 1.109106e+04  | 8.472481e+02  |
| 49 | -3.090890e+02 | 4.863281e+03  | -6.042446e+03 |
| 50 | -6.753016e+03 | -5.016346e+03 | 1.052319e+03  |
| 51 | -7.657809e+02 | 8.991739e+02  | 1.658586e+03  |
| 52 | 5.673382e+03  | 1.891933e+03  | -6.147802e+03 |
| 53 | -7.237232e+03 | -1.987451e+02 | 3.985074e+03  |
| 54 | -8.624702e+02 | 1.688895e+03  | -2.491150e+03 |

|    |               |               |               |
|----|---------------|---------------|---------------|
| 55 | -1.847865e+02 | -5.084126e+02 | 2.722140e+02  |
| 56 | 9.087391e+02  | -1.804936e+03 | 7.367283e+03  |
| 57 | -4.843940e+03 | 4.591224e+03  | 7.295221e+03  |
| 58 | -2.739204e+03 | -2.007770e+03 | 9.211137e+02  |
| 59 | 3.244858e+02  | 1.046457e+03  | -2.418149e+02 |
| 60 | -6.464788e+03 | -7.499134e+03 | -4.204413e+03 |
| 61 | -5.732132e+03 | -5.345541e+03 | 2.941426e+02  |
| 62 | 2.723249e+03  | -2.278270e+03 | -5.717477e+03 |
| 63 | -7.023049e+02 | -1.502520e+03 | 7.330887e+01  |
| 64 | -4.994790e+03 | 6.388341e+03  | 6.006467e+03  |
| 65 | 7.043207e+03  | -4.748529e+03 | -6.682904e+02 |
| 66 | 1.054531e+03  | 3.419873e+03  | 2.819321e+03  |
| 67 | -5.575858e+02 | 4.980597e+03  | -3.114271e+03 |

trajectory 26

| atom | VX            | VY            | VZ            |
|------|---------------|---------------|---------------|
| 1    | 3.305981e+01  | -1.278215e+02 | 8.717108e+01  |
| 2    | 4.131863e+02  | 1.418793e+02  | -5.602216e+02 |
| 3    | 3.007299e+01  | -1.379550e+03 | -1.052738e+03 |
| 4    | -2.772383e+01 | -1.166958e+03 | -1.362244e+02 |
| 5    | 1.353709e+03  | 8.140082e+02  | -2.060930e+02 |
| 6    | -3.933405e+03 | 2.561261e+02  | 3.178187e+03  |
| 7    | -1.547277e+03 | -6.505332e+03 | -6.440202e+03 |
| 8    | -5.372693e+01 | 1.262593e+03  | -3.395993e+03 |
| 9    | -6.275067e+01 | 2.619969e+02  | 1.105174e+03  |
| 10   | 7.856918e+02  | -8.224147e+02 | 9.404594e+02  |
| 11   | -4.759720e+02 | 6.592251e+02  | 3.363815e+02  |
| 12   | 9.023212e+01  | -3.981579e+03 | 4.602964e+03  |
| 13   | 6.358378e+02  | -6.910768e+03 | 6.396107e+03  |
| 14   | 6.460735e+02  | 4.025877e+02  | 1.183691e+03  |
| 15   | 5.932673e+02  | -2.304820e+03 | -1.757425e+03 |
| 16   | 1.253813e+02  | 8.303594e+02  | 7.436853e+02  |
| 17   | -2.127197e+02 | 1.534959e+02  | 1.407944e+02  |
| 18   | 1.258367e+03  | 5.829563e+02  | 9.075702e+02  |
| 19   | -9.007206e+02 | -4.874047e+02 | 5.591716e+02  |
| 20   | 2.013668e+02  | -3.387662e+02 | -3.615759e+02 |
| 21   | 2.644977e+02  | 1.327942e+03  | -1.050571e+03 |
| 22   | 4.564099e+02  | -8.509060e+01 | 2.696854e+02  |
| 23   | -7.646874e+02 | 2.239107e+02  | -6.942052e+02 |
| 24   | -2.759122e+02 | -8.695758e+01 | -4.625155e+00 |
| 25   | 9.302245e+02  | 2.225388e+02  | -6.043895e+02 |
| 26   | 2.017166e+02  | 4.544318e+02  | 4.872928e+02  |
| 27   | -8.837972e+02 | 3.369571e+02  | -4.433397e+02 |
| 28   | 6.892081e+01  | 1.653681e+03  | -7.094694e+02 |

|    |               |               |               |
|----|---------------|---------------|---------------|
| 29 | 1.579651e+03  | 1.465299e+02  | -1.870840e+02 |
| 30 | 5.885332e+02  | 3.455831e+02  | 5.786589e+01  |
| 31 | -4.756286e+02 | -7.694597e+03 | 5.565218e+03  |
| 32 | -5.667170e+02 | -5.402991e+03 | 3.036148e+03  |
| 33 | -8.480026e+02 | -4.704437e+03 | -5.484075e+03 |
| 34 | 7.707758e+03  | -9.371533e+02 | 2.961831e+03  |
| 35 | 6.394995e+02  | -9.972563e+02 | -9.285568e+02 |
| 36 | 1.959992e+02  | 4.996953e+03  | -4.193066e+02 |
| 37 | -1.821815e+03 | 2.892994e+02  | 1.395062e+03  |
| 38 | -2.344287e+03 | 1.761312e+03  | -3.562240e+03 |
| 39 | -3.834309e+03 | -9.584640e+03 | -4.410571e+03 |
| 40 | -1.179913e+03 | 6.342539e+02  | -1.865409e+02 |
| 41 | 4.092754e+02  | -4.281879e+01 | 5.617076e+02  |
| 42 | 1.057618e+03  | 1.045521e+03  | -1.826649e+03 |
| 43 | -1.045621e+03 | 6.698017e+02  | 9.324250e+02  |
| 44 | -2.068953e+03 | -9.385837e+03 | 4.474183e+02  |
| 45 | -3.305753e+02 | -2.576953e+03 | 7.057802e+02  |
| 46 | -1.856300e+03 | -2.388367e+03 | -2.898193e+03 |
| 47 | 6.658910e+02  | 2.764805e+03  | -2.504189e+02 |
| 48 | -9.491354e+02 | 3.251649e+03  | -5.691788e+03 |
| 49 | 4.025266e+03  | 6.519041e+03  | -4.194577e+03 |
| 50 | 4.829066e+03  | -2.752156e+02 | -3.255398e+03 |
| 51 | -3.357269e+02 | -2.132949e+03 | -2.886803e+02 |
| 52 | 3.257521e+03  | 3.684633e+03  | 1.526836e+03  |
| 53 | 1.137635e+03  | -1.434987e+03 | 1.988737e+03  |
| 54 | -7.191864e+03 | 4.561328e+03  | -5.125715e+03 |
| 55 | -1.023486e+03 | 1.945189e+02  | -5.447913e+02 |
| 56 | -6.109789e+03 | -1.920219e+03 | -5.218445e+03 |
| 57 | -6.711417e+03 | -3.113950e+03 | -9.828277e+02 |
| 58 | 8.557027e+03  | 4.247325e+03  | 2.248213e+03  |
| 59 | 4.241357e+02  | 8.127224e+02  | 5.833330e+02  |
| 60 | -1.336825e+03 | 8.847128e+03  | 2.730084e+02  |
| 61 | 1.073120e+03  | -3.336159e+03 | 7.603157e+03  |
| 62 | 4.367135e+03  | 1.666534e+03  | -3.254856e+03 |
| 63 | -7.167413e+02 | -1.276332e+03 | -8.343430e+02 |
| 64 | 2.319349e+03  | 5.509457e+03  | 4.569811e+03  |
| 65 | -8.515929e+03 | 2.961706e+03  | 5.050547e+02  |
| 66 | -8.925191e+03 | 2.097201e+03  | -2.732215e+03 |
| 67 | -2.710077e+03 | -9.836871e+03 | 2.377568e+03  |

trajectory 27

| atom | VX            | VY           | VZ            |
|------|---------------|--------------|---------------|
| 1    | -8.416731e+01 | 3.719444e+02 | -3.376158e+02 |
| 2    | -5.696340e+02 | 5.878081e+02 | -9.295924e+01 |

|    |               |               |               |
|----|---------------|---------------|---------------|
| 3  | 1.488005e+02  | 1.190592e+03  | -1.081930e+03 |
| 4  | -3.532280e+02 | 6.550239e+02  | 5.002383e+02  |
| 5  | 2.670490e+02  | -1.424983e+03 | -3.479156e+02 |
| 6  | 5.715694e+03  | -3.427690e+03 | -5.806724e+03 |
| 7  | 2.887386e+02  | 3.291291e+03  | 6.816547e+03  |
| 8  | 3.335710e+03  | 4.578279e+03  | -3.953854e+03 |
| 9  | -2.796970e+02 | -1.643549e+02 | 3.075566e+02  |
| 10 | -7.898267e+02 | 1.218218e+03  | -1.241283e+03 |
| 11 | -8.834924e+02 | 5.662535e+02  | -1.220494e+03 |
| 12 | -3.692478e+02 | -4.600515e+03 | 4.589083e+03  |
| 13 | 5.556408e+03  | 1.459004e+03  | -4.850522e+03 |
| 14 | 1.456756e+02  | -9.646536e+02 | 7.491311e+01  |
| 15 | -9.743633e+02 | -6.400436e+01 | 6.424265e+02  |
| 16 | -3.193384e+02 | 2.043586e+02  | -1.313070e+02 |
| 17 | 4.308112e+01  | 6.219132e+01  | 1.466017e+02  |
| 18 | -1.062341e+03 | 4.998691e+02  | -1.401756e+03 |
| 19 | 2.014259e+03  | 1.409532e+03  | -8.681694e+01 |
| 20 | 7.698172e+01  | -8.149064e+02 | 1.697733e+02  |
| 21 | -6.984219e+02 | -6.255261e+02 | 1.613096e+03  |
| 22 | -1.370720e+03 | -4.772934e-02 | -4.522151e+02 |
| 23 | 1.785970e+02  | 1.101752e+03  | 2.923615e+02  |
| 24 | -5.707240e+02 | -5.539701e+02 | 4.345755e+02  |
| 25 | 1.917208e+02  | 2.015778e+02  | -5.789162e+02 |
| 26 | 3.332498e+02  | -1.482317e+02 | 3.009680e+02  |
| 27 | 2.035604e+01  | 6.344902e+02  | -8.049181e+01 |
| 28 | 3.254272e+02  | -1.426357e+03 | -1.658654e+02 |
| 29 | 8.653445e+02  | 5.411248e+02  | 1.378889e+03  |
| 30 | 1.053136e+03  | -6.516788e+02 | -4.284742e+02 |
| 31 | -9.467225e+03 | -1.114304e+03 | 4.669833e+02  |
| 32 | -1.535521e+03 | 2.166039e+03  | -1.016785e+02 |
| 33 | -3.970611e+02 | -3.153745e+03 | 3.642577e+03  |
| 34 | 3.803806e+03  | -1.398185e+03 | -3.627933e+03 |
| 35 | -2.246963e+03 | 4.718880e+02  | -1.728136e+02 |
| 36 | 5.712266e+03  | 1.616367e+03  | -5.946477e+03 |
| 37 | -2.028360e+03 | -1.837845e+03 | -4.221012e+02 |
| 38 | -1.964045e+01 | 8.524556e+02  | 2.371159e+03  |
| 39 | -1.644841e+03 | -1.060189e+03 | 1.175787e+04  |
| 40 | 1.839109e+03  | -1.738120e+03 | 3.470335e+02  |
| 41 | -7.240816e+02 | 6.921909e+02  | -1.150953e+02 |
| 42 | 4.211467e+02  | 5.020766e+02  | 1.392222e+03  |
| 43 | 1.963475e+03  | -1.386276e+01 | -2.181976e+01 |
| 44 | 6.404398e+03  | 4.022713e+03  | -2.498246e+03 |
| 45 | -2.286886e+02 | -1.437236e+02 | 5.627948e+02  |
| 46 | -2.340915e+03 | -8.773019e+03 | -1.285714e+03 |
| 47 | -5.057572e+01 | 2.385996e+02  | 2.260558e+02  |
| 48 | 1.050619e+03  | -1.604747e+03 | -4.941813e+03 |

|    |               |               |               |
|----|---------------|---------------|---------------|
| 49 | -7.419872e+03 | -7.544505e+03 | 3.720424e+03  |
| 50 | 1.311017e+03  | -3.879264e+03 | 2.889749e+03  |
| 51 | 3.023637e+02  | -1.187249e+03 | 3.408540e+02  |
| 52 | 7.293351e+03  | -1.033375e+04 | -2.945931e+03 |
| 53 | 2.705496e+03  | -2.097305e+03 | 8.542804e+02  |
| 54 | 1.774159e+03  | 8.939622e+03  | -4.756792e+03 |
| 55 | 9.309994e+02  | 8.996542e+01  | 2.429761e+03  |
| 56 | 2.276518e+03  | -1.994160e+03 | -3.768656e+03 |
| 57 | -2.564587e+03 | -7.274244e+03 | -5.556358e+03 |
| 58 | 5.100166e+03  | 1.003189e+03  | -7.153038e+02 |
| 59 | 3.150274e+01  | 2.363009e+02  | -6.334686e+02 |
| 60 | 1.162833e+03  | -1.236363e+04 | -1.056488e+03 |
| 61 | 1.618035e+03  | 1.826244e+02  | 8.380389e+02  |
| 62 | 3.200466e+03  | -2.934023e+03 | 3.283195e+03  |
| 63 | 8.701203e+00  | 8.939841e+02  | 8.469473e+02  |
| 64 | -1.784456e+03 | -4.599004e+03 | -8.351183e+03 |
| 65 | -4.943787e+02 | -2.015314e+03 | -5.225574e+03 |
| 66 | 6.753800e+03  | 4.991294e+03  | 1.579294e+03  |
| 67 | 1.508188e+03  | 3.834719e+03  | -4.384729e+03 |

trajectory 28

| atom | VX            | VY            | VZ            |
|------|---------------|---------------|---------------|
| 1    | -4.706390e+01 | 2.342859e+02  | 2.054642e+02  |
| 2    | 4.914251e+02  | 4.533107e+02  | -1.844818e+03 |
| 3    | -7.296168e+02 | 7.232607e+02  | -9.603370e+02 |
| 4    | -6.305236e+02 | -3.746495e+02 | 4.922364e+02  |
| 5    | 2.692807e+02  | 1.607092e+03  | 5.811269e+02  |
| 6    | -7.878284e+03 | -3.636378e+03 | -7.364590e+02 |
| 7    | 3.038093e+03  | -8.871698e+03 | -1.248479e+03 |
| 8    | -1.702172e+03 | 2.277691e+03  | -3.272238e+03 |
| 9    | -1.452376e+02 | 7.114831e+01  | 6.537717e+02  |
| 10   | -9.759534e+01 | -3.046880e+02 | 2.540172e+03  |
| 11   | -7.392483e+02 | 3.498340e+02  | -2.818622e+02 |
| 12   | 1.575909e+03  | 7.946055e+03  | -1.439683e+03 |
| 13   | 1.577384e+03  | 3.072165e+03  | -2.868706e+03 |
| 14   | 4.503446e+02  | 6.393235e+02  | -1.044629e+03 |
| 15   | 5.382140e+01  | 1.169535e+03  | 3.401319e+02  |
| 16   | -3.888611e+02 | -4.456828e+02 | -1.151303e+02 |
| 17   | 1.426193e+02  | -2.960825e+02 | -4.210957e+02 |
| 18   | 4.577606e+02  | 3.237761e+01  | 1.805901e+02  |
| 19   | -2.034985e+03 | -1.025367e+03 | -1.482296e+03 |
| 20   | 3.020574e+02  | -7.410514e+01 | 1.222777e+03  |
| 21   | -5.590556e+02 | -1.328901e+03 | -1.614286e+02 |
| 22   | 3.516864e+02  | 3.516538e+02  | 1.161817e+03  |

|    |               |               |               |
|----|---------------|---------------|---------------|
| 23 | 3.822145e+02  | -1.337854e+03 | 6.793189e+02  |
| 24 | -6.112980e+02 | -7.102635e+01 | 3.519959e+02  |
| 25 | -5.984916e+02 | -2.530249e+03 | -8.329862e+02 |
| 26 | 3.064905e+02  | 1.211801e+03  | 2.171890e+02  |
| 27 | 7.000874e+02  | 2.478309e+02  | -6.811326e+00 |
| 28 | -1.485953e+03 | 5.227360e+02  | -1.197127e+03 |
| 29 | -1.632236e+03 | 2.015453e+02  | -8.481089e+02 |
| 30 | 6.500483e+01  | -3.478897e+02 | -7.500959e+02 |
| 31 | 3.610605e+02  | -4.166441e+03 | 1.100386e+03  |
| 32 | -3.234146e+03 | -5.633455e+02 | 3.973271e+03  |
| 33 | 1.038784e+04  | -7.192130e+03 | -1.089388e+03 |
| 34 | -5.655905e+03 | 1.677376e+03  | 1.897668e+03  |
| 35 | 3.086782e+03  | 2.070895e+02  | 4.736181e+02  |
| 36 | -2.664038e+03 | -2.389138e+03 | 6.580679e+03  |
| 37 | 3.527980e+02  | 1.466535e+02  | -5.649121e+02 |
| 38 | 4.985185e+03  | -1.010449e+03 | 5.337517e+02  |
| 39 | -3.233386e+03 | 1.267928e+03  | 7.874793e+03  |
| 40 | 5.828520e+02  | -1.226028e+03 | -7.501509e+02 |
| 41 | -1.711537e+03 | -9.939720e+02 | -4.861116e+02 |
| 42 | 1.141233e+03  | 7.307433e+02  | -5.073108e+02 |
| 43 | 1.878358e+03  | 8.640554e+01  | 1.610581e+03  |
| 44 | -3.583158e+03 | 5.029469e+03  | 6.535034e+03  |
| 45 | 1.002806e+03  | -2.447361e+02 | -1.317497e+03 |
| 46 | -9.837681e+02 | -3.875505e+03 | 4.595111e+03  |
| 47 | -8.908562e+02 | 5.784195e+02  | -3.864182e+02 |
| 48 | -5.193472e+03 | 4.555658e+03  | 2.846865e+03  |
| 49 | -5.012246e+03 | -5.105783e+03 | 6.504083e+03  |
| 50 | 3.022352e+03  | -3.154756e+02 | 9.007556e+01  |
| 51 | 1.299941e+03  | 1.357579e+03  | 1.250033e+03  |
| 52 | -7.799932e+03 | -3.656629e+03 | 6.400595e+02  |
| 53 | -4.708685e+03 | 5.918464e+03  | 6.552543e+02  |
| 54 | 6.077400e+02  | 8.329642e+03  | -1.519556e+03 |
| 55 | 1.450813e+03  | 6.901236e+02  | -5.770301e+02 |
| 56 | 1.772877e+02  | -1.847665e+03 | 3.755798e+03  |
| 57 | -6.861177e+03 | 6.622017e+03  | 4.498199e+03  |
| 58 | -2.309331e+03 | -4.524166e+03 | 9.527781e+02  |
| 59 | 1.025978e+03  | -4.469407e+02 | -4.267584e+02 |
| 60 | -7.378289e+03 | -2.789766e+03 | 3.489039e+03  |
| 61 | -6.792450e+03 | 3.205383e+03  | -5.011907e+03 |
| 62 | -3.345623e+03 | 2.735108e+03  | -1.555894e+03 |
| 63 | -6.916071e+02 | 4.807984e+02  | 1.045512e+03  |
| 64 | 4.790343e+03  | -3.079787e+03 | -4.145388e+03 |
| 65 | 2.313314e+03  | 3.381660e+03  | -1.600187e+03 |
| 66 | 4.768189e+03  | 3.380680e+03  | -1.844799e+03 |
| 67 | 5.142528e+02  | -6.603537e+03 | 2.741950e+03  |

trajectory 29

| atom | VX            | VY            | VZ            |
|------|---------------|---------------|---------------|
| 1    | -3.476082e+02 | -1.434900e+02 | -1.358437e+01 |
| 2    | -9.903520e+00 | -8.928030e+01 | -3.009863e+02 |
| 3    | -4.301054e+02 | 2.882976e+02  | 4.100225e+02  |
| 4    | -5.617277e+02 | 1.002819e+03  | 5.321848e+02  |
| 5    | 6.682624e+02  | -1.402376e+03 | -7.606091e+01 |
| 6    | -9.814328e+03 | 1.011313e+03  | 8.428626e+03  |
| 7    | 2.515680e+03  | 4.887973e+03  | -1.135024e+03 |
| 8    | -7.580824e+02 | 7.208961e+03  | -1.666239e+03 |
| 9    | 7.630195e+02  | -2.683321e+02 | -1.154099e+03 |
| 10   | 1.584954e+02  | 8.640326e+02  | 1.023714e+03  |
| 11   | 6.735714e+02  | 4.141154e+02  | -4.142540e+02 |
| 12   | -6.158129e+03 | -4.216773e+03 | 1.194091e+03  |
| 13   | -3.256815e+03 | -5.509584e+03 | 3.486639e+03  |
| 14   | -7.584126e+02 | 7.339128e+02  | 6.710292e+02  |
| 15   | 1.361430e+02  | -4.132834e+02 | -1.965491e+03 |
| 16   | -6.626932e+01 | -3.324458e+02 | -6.070667e+01 |
| 17   | 1.706919e+02  | -1.713647e+02 | 2.681099e+02  |
| 18   | -2.052228e+02 | -7.215804e+02 | 5.408717e+02  |
| 19   | -6.208955e+02 | 8.234897e+02  | -9.796262e+02 |
| 20   | 1.186042e+03  | -1.029795e+03 | -3.975192e+02 |
| 21   | -7.146581e+01 | -1.691822e+02 | 6.505999e+02  |
| 22   | -2.168498e+02 | 2.184003e+02  | -7.933414e+02 |
| 23   | -8.728086e+02 | 8.563401e+02  | -8.842632e+02 |
| 24   | -1.838468e+02 | 1.045005e+03  | -2.212932e+02 |
| 25   | 1.743452e+03  | 4.873528e+02  | -4.983698e+02 |
| 26   | -1.308422e+03 | -1.079905e+03 | -4.901189e+02 |
| 27   | 1.152309e+03  | 1.953652e+02  | 1.223216e+03  |
| 28   | 1.354959e+03  | -4.874345e+02 | -1.633758e+03 |
| 29   | -7.873103e+02 | 8.613174e+02  | 1.124007e+03  |
| 30   | 6.910291e+02  | 1.398538e+03  | -4.345140e+02 |
| 31   | 6.036493e+03  | 7.130877e+03  | -5.252226e+03 |
| 32   | -1.946004e+03 | -6.614168e+02 | -3.830573e+03 |
| 33   | 2.196865e+03  | 1.281809e+02  | -1.753999e+02 |
| 34   | -7.648104e+03 | 2.226535e+03  | -6.385371e+03 |
| 35   | -1.142536e+03 | -1.909084e+02 | -3.248923e+02 |
| 36   | 4.832037e+03  | 7.353691e+03  | 1.511458e+03  |
| 37   | 2.030886e+02  | -4.671810e+02 | -2.697149e+02 |
| 38   | 6.442779e+03  | -1.187411e+03 | 5.288600e+03  |
| 39   | -1.629656e+03 | -2.750759e+03 | -5.211807e+03 |
| 40   | -7.861844e+01 | -9.991510e+02 | 1.777160e+03  |
| 41   | -1.633089e+03 | 2.622165e+02  | 8.351596e+02  |
| 42   | 1.070610e+03  | 1.476043e+02  | 3.186711e+00  |



|    |               |               |               |
|----|---------------|---------------|---------------|
| 43 | -4.583422e+02 | -9.686119e+02 | -2.188594e+03 |
| 44 | 5.639280e+03  | -1.263445e+03 | -1.042101e+03 |
| 45 | 1.389017e+03  | -4.804744e+02 | 1.214080e+03  |
| 46 | 4.125621e+02  | 3.315537e+03  | -8.240090e+02 |
| 47 | -2.931224e+02 | 9.203957e+02  | 1.178701e+02  |
| 48 | 5.700440e+03  | -1.128181e+03 | 4.000690e+03  |
| 49 | -1.436785e+04 | 2.029887e+02  | 2.768321e+03  |
| 50 | -4.933720e+03 | 2.455132e+03  | 2.402649e+02  |
| 51 | 1.129292e+03  | -2.470359e+02 | 8.723697e+02  |
| 52 | 7.837821e+02  | -1.183039e+03 | -6.212814e+03 |
| 53 | 6.826578e+03  | -2.275320e+03 | -1.432187e+03 |
| 54 | -2.308701e+03 | 9.071958e+03  | -5.250048e+02 |
| 55 | 5.157289e+02  | -8.753751e+02 | -8.607551e+02 |
| 56 | -8.310455e+02 | -1.124398e+02 | 1.440520e+03  |
| 57 | 1.315731e+03  | 7.354029e+03  | 5.775792e+03  |
| 58 | -1.777275e+03 | -6.710943e+03 | 4.096826e+03  |
| 59 | 9.509796e+02  | 4.244620e+02  | 7.010333e+02  |
| 60 | -6.377203e+03 | -2.646074e+03 | 7.324218e+02  |
| 61 | 4.539261e+03  | 2.183873e+03  | -9.521393e+03 |
| 62 | -3.382335e+03 | 3.243107e+03  | -2.129853e+03 |
| 63 | -1.666161e+02 | 2.459527e+02  | 1.418371e+03  |
| 64 | -3.921262e+03 | -3.867788e+03 | -6.678214e+03 |
| 65 | 1.947298e+03  | -2.453753e+03 | -4.489257e+03 |
| 66 | 5.775322e+03  | 3.270190e+03  | 1.335650e+03  |
| 67 | -6.232207e+03 | -4.605340e+03 | 3.363187e+03  |

trajectory 30

| atom | VX            | VY            | VZ            |
|------|---------------|---------------|---------------|
| 1    | -1.190327e+01 | -1.381059e+02 | 3.320893e+02  |
| 2    | 1.193653e+03  | 8.857290e+01  | 2.041891e+03  |
| 3    | -4.300259e+02 | -8.598569e+02 | 1.790517e+03  |
| 4    | 7.121928e+02  | -4.075149e+02 | -9.339961e+02 |
| 5    | -8.904015e+02 | 3.502169e+02  | 3.712270e+02  |
| 6    | 5.869130e+03  | 5.262331e+03  | -5.223412e+03 |
| 7    | 1.883141e+03  | 4.581546e+03  | -7.173631e+03 |
| 8    | -3.628103e+03 | 1.059104e+03  | 1.261022e+03  |
| 9    | -8.898703e+02 | -1.124343e+03 | 2.148470e+02  |
| 10   | -3.794137e+02 | -6.455434e+02 | -1.198303e+03 |
| 11   | -9.680925e+02 | 7.246486e+01  | 7.946256e+02  |
| 12   | 6.391330e+03  | 1.752124e+02  | -3.283269e+02 |
| 13   | 2.462944e+03  | 5.838519e+03  | -4.214148e+03 |
| 14   | 6.667899e+02  | -3.078211e+02 | -8.676251e+02 |
| 15   | -8.390001e+02 | 3.102782e+02  | -1.482542e+03 |
| 16   | 7.404133e+02  | 1.143785e+03  | 2.512198e+02  |

|    |               |               |               |
|----|---------------|---------------|---------------|
| 17 | 2.627373e+02  | 1.367793e+02  | -2.004322e+01 |
| 18 | -1.139433e+03 | 1.896609e+02  | 3.826947e+02  |
| 19 | 4.468689e+02  | -6.314180e+02 | -7.651497e+02 |
| 20 | 6.225046e+02  | 2.804814e+02  | -2.046124e+02 |
| 21 | -1.798739e+03 | -2.253353e+02 | -1.225095e+03 |
| 22 | 2.735608e+03  | 8.035771e+02  | -2.103837e+02 |
| 23 | -7.452027e+02 | 7.011737e+02  | 5.013136e+02  |
| 24 | -3.249288e+02 | -1.372778e+03 | 2.759861e+02  |
| 25 | -2.106649e+02 | 6.560667e+02  | -2.961726e+02 |
| 26 | -8.317092e+02 | -9.944452e+02 | 4.951090e+02  |
| 27 | -1.132364e+03 | -4.506758e+02 | -4.925618e+02 |
| 28 | -1.020614e+03 | 1.754688e+02  | 1.480673e+03  |
| 29 | -1.271672e+03 | -5.871184e+02 | -3.115922e+02 |
| 30 | 1.460550e+03  | 1.240507e+03  | 7.498160e+02  |
| 31 | -2.893832e+03 | -4.913448e+03 | 2.720087e+03  |
| 32 | -4.950866e+03 | 9.231678e+02  | -3.986985e+03 |
| 33 | -3.817339e+03 | 2.044683e+03  | -5.214350e+03 |
| 34 | 5.947596e+03  | 3.971781e+02  | 2.920510e+02  |
| 35 | -8.207462e+02 | 2.983108e+02  | 1.614679e+02  |
| 36 | 7.574530e+03  | 3.950578e+03  | -2.569360e+03 |
| 37 | 1.285637e+03  | -1.502299e+03 | 1.644069e+03  |
| 38 | -2.744105e+03 | 1.991863e+02  | -5.897668e+03 |
| 39 | 4.995368e+03  | 2.910746e+03  | 5.915709e+03  |
| 40 | -1.149912e+03 | 1.123986e+03  | -1.072748e+03 |
| 41 | -1.658723e+03 | -3.985977e+02 | -1.075834e+02 |
| 42 | 2.300988e+02  | -3.256439e+02 | 4.869016e+02  |
| 43 | 1.354286e+03  | -2.134384e+02 | -5.248195e+02 |
| 44 | 8.816597e+03  | 4.233642e+03  | -2.911202e+03 |
| 45 | 1.033232e+03  | -7.240297e+02 | -8.675711e+02 |
| 46 | -6.155283e+03 | -1.938527e+03 | 9.358845e+02  |
| 47 | -1.147958e+03 | 8.899003e+02  | 1.378033e+02  |
| 48 | -4.169749e+03 | 4.276410e+03  | -6.696900e+03 |
| 49 | 2.791756e+03  | -5.661773e+03 | 1.200194e+03  |
| 50 | -4.237907e+02 | 2.138097e+03  | 4.162818e+03  |
| 51 | 1.764503e+02  | -8.555309e+02 | 5.000612e+02  |
| 52 | -8.952882e+02 | -5.435841e+02 | -5.576607e+03 |
| 53 | 4.386602e+03  | 1.406397e+03  | -3.898788e+03 |
| 54 | 5.419421e+02  | 8.136729e+03  | -6.656396e+03 |
| 55 | 1.407053e+03  | 1.066884e+01  | -1.274838e+03 |
| 56 | -2.882871e+03 | -3.151799e+03 | 8.683243e+03  |
| 57 | 1.417624e+03  | -1.128187e+03 | 5.570618e+03  |
| 58 | -1.242311e+03 | 2.514027e+03  | 8.224723e+03  |
| 59 | 1.749057e+03  | 4.789982e+01  | -1.464176e+03 |
| 60 | 3.009968e+03  | -2.518868e+02 | 2.063130e+03  |
| 61 | 4.315886e+03  | 2.764907e+03  | -6.749175e+02 |
| 62 | -9.661287e+03 | -2.574247e+03 | -2.316212e+03 |

|    |               |               |               |
|----|---------------|---------------|---------------|
| 63 | -2.025100e+03 | 1.488381e+03  | 3.804652e+02  |
| 64 | -7.637701e+02 | -7.034118e+03 | -2.582124e+03 |
| 65 | 7.787254e+03  | -4.136071e+03 | 7.777138e+02  |
| 66 | 5.177585e+03  | 1.737262e+03  | 4.120575e+03  |
| 67 | 3.041058e+03  | 6.214762e+03  | 1.251396e+02  |

trajectory 31

| atom | VX            | VY            | VZ            |
|------|---------------|---------------|---------------|
| 1    | 9.713005e+01  | 8.059415e+01  | -7.632919e+01 |
| 2    | -1.526450e+03 | 4.910151e+02  | -4.330234e+00 |
| 3    | 4.886936e+02  | -5.973570e+02 | 3.366691e+02  |
| 4    | -1.516986e+03 | 1.027310e+02  | 1.141127e+03  |
| 5    | -1.323738e+03 | -2.728639e+02 | -8.494244e+01 |
| 6    | 7.546586e+03  | 2.315593e+03  | -6.582587e+03 |
| 7    | 4.957669e+03  | 1.561499e+03  | -3.212902e+03 |
| 8    | -3.328191e+03 | -3.134149e+02 | -2.742430e+02 |
| 9    | -5.941724e+01 | -1.563733e+02 | -1.722611e+03 |
| 10   | 2.099992e+03  | -6.322006e+02 | -7.306165e+02 |
| 11   | 1.051813e+03  | -1.649323e+03 | -2.886405e+02 |
| 12   | -4.697902e+03 | -2.020166e+03 | 5.687887e+02  |
| 13   | -5.178005e+03 | -5.635750e+02 | 2.699083e+03  |
| 14   | -1.167737e+03 | -5.296916e+02 | 2.077547e+02  |
| 15   | 1.982253e+02  | -4.458447e+02 | -7.878050e+02 |
| 16   | 1.293302e+03  | 6.045492e+02  | -6.604847e+02 |
| 17   | -1.565898e+02 | 2.959171e+02  | 3.412251e+02  |
| 18   | 1.396012e+03  | 6.551780e+02  | -7.821100e+02 |
| 19   | -4.516947e+02 | -5.014088e+02 | 8.494152e+02  |
| 20   | -5.782270e+02 | -7.162039e+02 | -2.486510e+02 |
| 21   | 1.069829e+03  | 7.874427e+02  | -1.378605e+01 |
| 22   | -1.006626e+03 | -2.112367e+03 | 1.999233e+03  |
| 23   | 3.788988e+02  | -1.354620e+02 | -2.575283e+02 |
| 24   | -6.953348e+02 | 4.036778e+02  | -5.010921e+02 |
| 25   | 1.387997e+03  | -1.608676e+02 | 2.821938e+02  |
| 26   | -1.359675e+02 | 3.941790e+02  | -6.537337e+02 |
| 27   | 1.306236e+03  | 2.075765e+02  | 5.855557e+02  |
| 28   | -8.546055e+02 | -1.327351e+03 | 1.812705e+03  |
| 29   | 2.434995e+02  | -6.079710e+02 | -3.216502e+02 |
| 30   | -1.320609e+03 | 9.860987e+02  | -1.032775e+03 |
| 31   | -6.904884e+02 | -9.180753e+03 | -1.783353e+02 |
| 32   | -8.533927e+02 | 5.501288e+02  | -2.946864e+02 |
| 33   | 3.402623e+03  | 4.233260e+03  | -2.588196e+03 |
| 34   | -7.083693e+03 | 2.055598e+03  | -2.875571e+03 |
| 35   | -4.810823e+02 | 1.085251e+03  | -5.071626e+02 |
| 36   | 8.152100e+03  | 5.287067e+03  | -1.631159e+03 |

|    |               |               |               |
|----|---------------|---------------|---------------|
| 37 | 1.284009e+03  | -1.293892e+03 | 7.176052e+02  |
| 38 | -2.504692e+03 | 2.867704e+03  | -7.780413e+03 |
| 39 | -3.551868e+03 | 7.250519e+02  | -1.194406e+01 |
| 40 | -1.261212e+03 | -9.966293e+02 | 2.087119e+02  |
| 41 | 2.426263e+02  | -2.592116e+02 | 2.139792e+02  |
| 42 | 9.469792e+02  | 4.658514e+02  | 8.013590e+02  |
| 43 | 8.192900e+02  | -1.835391e+01 | 1.171613e+03  |
| 44 | -6.535541e+03 | -2.514494e+03 | -2.371580e+03 |
| 45 | -1.568304e+03 | 6.340958e+02  | 4.844729e+02  |
| 46 | 3.182641e+03  | 7.641044e+03  | -8.637328e+03 |
| 47 | -5.825007e+01 | 5.164543e+02  | 6.885149e+01  |
| 48 | -2.130391e+03 | 2.995638e+03  | -6.988090e+03 |
| 49 | -6.857134e+03 | -3.527213e+03 | 8.789158e+02  |
| 50 | -3.670735e+03 | 3.128794e+03  | 3.008890e+03  |
| 51 | -5.399017e+01 | -6.519523e+02 | 8.409684e+02  |
| 52 | 2.829041e+03  | 5.712965e+03  | -6.708641e+03 |
| 53 | 1.215132e+03  | -6.815345e+03 | -7.540093e+03 |
| 54 | 1.438734e+03  | 8.381235e+02  | -1.301811e+03 |
| 55 | -3.279731e+02 | -1.569876e+02 | -7.316526e+02 |
| 56 | 7.467577e+03  | -3.549666e+03 | -4.566474e+03 |
| 57 | 2.110628e+02  | 2.597659e+03  | 8.313350e+03  |
| 58 | 1.572119e+03  | 5.073990e+03  | -8.935730e+02 |
| 59 | 3.221584e+02  | 1.155950e+03  | 1.047267e+03  |
| 60 | 6.080547e+03  | -2.123904e+03 | -2.670803e+03 |
| 61 | 2.820114e+03  | 1.440574e+03  | 3.711508e+02  |
| 62 | -1.089606e+04 | -1.165755e+03 | 3.030361e+03  |
| 63 | 8.020118e+02  | -7.334591e+02 | -9.645235e+02 |
| 64 | -7.193113e+03 | 6.143826e+03  | 3.882238e+03  |
| 65 | 1.610208e+03  | 2.993170e+03  | -3.447739e+03 |
| 66 | 2.177242e+03  | 2.826846e+03  | 3.210976e+03  |
| 67 | 5.360929e+03  | -8.149066e+03 | 1.959771e+03  |

trajectory 32

| atom | VX            | VY            | VZ            |
|------|---------------|---------------|---------------|
| 1    | 2.097126e+02  | 3.326633e+01  | 8.677794e+01  |
| 2    | 6.833667e+02  | 1.695231e+03  | -3.893493e+02 |
| 3    | 1.587077e+03  | -5.294524e+02 | -1.544458e+03 |
| 4    | -2.728552e+02 | -2.774415e+02 | -1.487897e+01 |
| 5    | 1.268753e+03  | 9.055536e+02  | -3.217971e+02 |
| 6    | -1.035900e+04 | -1.879441e+03 | 3.533131e+03  |
| 7    | -6.374978e+03 | -6.729375e+02 | 2.055932e+03  |
| 8    | 1.383279e+03  | 3.704530e+03  | 2.738594e+02  |
| 9    | -7.984650e+02 | 2.201521e+02  | 1.996882e+02  |
| 10   | -7.123713e+02 | -1.022923e+03 | 8.170031e+02  |

|    |               |               |               |
|----|---------------|---------------|---------------|
| 11 | -8.748914e+02 | -9.343713e+02 | -3.921441e+02 |
| 12 | 2.733012e+02  | 1.021321e+04  | -2.083551e+03 |
| 13 | -5.122701e+03 | -6.079245e+03 | 3.282069e+03  |
| 14 | 1.745424e+03  | 1.926646e+02  | 1.142619e+03  |
| 15 | -8.360986e+02 | 1.661098e+02  | -3.587746e+02 |
| 16 | 8.519205e+02  | -7.086086e+02 | -5.235467e+02 |
| 17 | -1.481264e+02 | -9.619252e+01 | 5.182833e+01  |
| 18 | -9.324629e+02 | -1.095486e+02 | 5.353497e+02  |
| 19 | 8.072138e+02  | 7.517494e+02  | -1.116625e+03 |
| 20 | -8.215049e+02 | 4.983764e+02  | -3.147344e+02 |
| 21 | 1.067454e+03  | -9.997721e+02 | -1.673910e+02 |
| 22 | 4.559452e+02  | -2.549344e+01 | 1.371865e+02  |
| 23 | 2.491622e+02  | -6.029976e+02 | 8.751164e+02  |
| 24 | -8.390660e+02 | 1.535543e+02  | -4.357268e+02 |
| 25 | 7.612362e+02  | 1.547574e+03  | 1.618969e+03  |
| 26 | -4.789971e+02 | -5.217843e+02 | 3.713590e+01  |
| 27 | -3.401604e+02 | 1.528830e+03  | -7.334928e+02 |
| 28 | -8.094108e+02 | -4.687501e+02 | 1.075938e+03  |
| 29 | -2.767981e+02 | -3.825445e+01 | -2.390045e+02 |
| 30 | 1.130859e+02  | -6.339194e+02 | -2.634140e+02 |
| 31 | 1.901635e+03  | -8.336932e+03 | 1.357038e+03  |
| 32 | -3.956773e+02 | 1.913888e+03  | -8.596888e+02 |
| 33 | -1.909332e+03 | 4.280392e+03  | 2.424423e+03  |
| 34 | -9.257146e+03 | 1.100083e+02  | -2.621158e+03 |
| 35 | 9.119818e+02  | 1.642759e+02  | -7.961990e+02 |
| 36 | 5.165883e+03  | 8.858532e+03  | -2.641477e+03 |
| 37 | 3.171033e+02  | 1.076915e+02  | -4.414735e+02 |
| 38 | 1.351724e+03  | 1.701353e+03  | 3.455494e+03  |
| 39 | -7.181340e+03 | 7.768213e+03  | -8.860361e+02 |
| 40 | -6.307186e+01 | 2.043683e+03  | -2.093134e+03 |
| 41 | 1.008668e+03  | 4.633452e+02  | 1.180609e+03  |
| 42 | -1.507146e+03 | 2.789043e+02  | 1.804522e+02  |
| 43 | 9.144390e+02  | -1.377250e+03 | 7.737176e+01  |
| 44 | -9.703523e+03 | -8.373911e+02 | -2.209952e+03 |
| 45 | 1.192549e+03  | -1.693831e+02 | -6.657891e+02 |
| 46 | 3.384406e+03  | -9.125500e+03 | 6.405332e+03  |
| 47 | -4.664986e+02 | -1.970329e+02 | 1.268590e+03  |
| 48 | -5.344660e+01 | 2.615140e+03  | 1.664879e+03  |
| 49 | -6.960946e+02 | 9.486242e+02  | 3.323773e+03  |
| 50 | -2.103265e+03 | 4.325540e+02  | 3.569221e+03  |
| 51 | 6.848830e+02  | 9.957076e+02  | -1.314577e+03 |
| 52 | 1.940715e+02  | -3.068623e+03 | 1.526732e+03  |
| 53 | -1.578051e+03 | -6.836626e+03 | 1.105387e+03  |
| 54 | 4.980100e+02  | -1.010427e+04 | 1.220910e+03  |
| 55 | -1.120222e+03 | 4.436569e+00  | 7.622560e+02  |
| 56 | 2.114494e+03  | -7.281204e+03 | -1.734034e+02 |

|    |               |               |               |
|----|---------------|---------------|---------------|
| 57 | -5.425231e+03 | -1.017993e+03 | 6.548133e+02  |
| 58 | 8.706521e+03  | 3.653914e+03  | -2.417127e+01 |
| 59 | -2.319108e+03 | -3.999361e+01 | -1.901304e+03 |
| 60 | 3.621167e+03  | -3.378523e+03 | -1.236225e+03 |
| 61 | -3.223778e+02 | 1.276256e+03  | -2.061913e+03 |
| 62 | 8.837515e+03  | -2.822951e+03 | 8.892382e+02  |
| 63 | -2.540875e+02 | 1.234701e+03  | 2.503966e+02  |
| 64 | 5.027903e+03  | -8.269654e+03 | -1.425279e+03 |
| 65 | 3.064767e+03  | -3.117902e+03 | 5.609982e+03  |
| 66 | -2.177805e+03 | -3.001610e+03 | -2.057110e+03 |
| 67 | 1.043182e+03  | -7.825301e+03 | 2.571630e+03  |

trajectory 33

| atom | VX            | VY            | VZ            |
|------|---------------|---------------|---------------|
| 1    | 1.175764e+01  | -1.440573e+02 | -1.709973e+02 |
| 2    | 1.643356e+02  | 7.184507e+02  | -1.063077e+02 |
| 3    | -5.995276e+02 | -2.369874e+02 | 1.455107e+03  |
| 4    | 6.609097e+02  | 6.190756e+02  | -1.141753e+03 |
| 5    | 5.435544e+02  | -3.748642e+02 | 8.050426e+02  |
| 6    | 3.054875e+03  | -9.342851e+02 | 1.263435e+03  |
| 7    | 5.912381e+03  | -3.322413e+02 | -9.296131e+02 |
| 8    | -6.411115e+03 | -4.180524e+03 | -5.638294e+03 |
| 9    | 3.177368e+01  | -4.477429e+02 | -2.853126e+02 |
| 10   | -1.075764e+02 | -1.411104e+03 | 1.632269e+03  |
| 11   | 1.635685e+03  | 1.159679e+03  | -1.057281e+03 |
| 12   | -3.897706e+03 | -1.835722e+03 | 1.254943e+03  |
| 13   | -3.685778e+03 | 2.004892e+03  | -7.180394e+03 |
| 14   | -5.980060e+02 | 1.332781e+03  | -1.486137e+02 |
| 15   | -2.527906e+02 | -2.158999e+02 | 6.510832e+02  |
| 16   | -8.542791e+02 | -9.361325e+02 | 2.132810e+02  |
| 17   | 2.308115e+02  | 3.785900e+02  | 1.330018e+02  |
| 18   | 1.761081e+03  | -1.525978e+02 | 2.554474e+02  |
| 19   | -1.616670e+03 | -4.261644e+02 | 8.011854e+00  |
| 20   | -4.619629e+02 | 6.091773e+02  | 9.398544e+02  |
| 21   | 7.254129e+02  | -1.293856e+03 | 6.121405e+02  |
| 22   | 5.210741e+02  | -5.653799e+02 | 3.840974e+01  |
| 23   | -7.425168e+02 | 5.503565e+02  | 1.204666e+02  |
| 24   | 1.587067e+03  | -2.069473e+01 | -1.421561e+03 |
| 25   | -1.243733e+03 | 3.226622e+02  | 9.649517e+02  |
| 26   | -1.387636e+03 | -1.081840e+03 | -8.291498e+02 |
| 27   | 5.060758e+02  | -8.885832e+02 | 3.381738e+02  |
| 28   | -1.720278e+03 | -1.445947e+03 | 7.497415e+02  |
| 29   | -1.758466e+03 | 4.788075e+02  | -1.911462e+02 |
| 30   | -2.651335e+02 | 1.480902e+03  | 2.515890e+02  |

|    |               |               |               |
|----|---------------|---------------|---------------|
| 31 | 5.524668e+03  | 4.885521e+03  | -3.551294e+03 |
| 32 | 1.273911e+04  | 5.614206e+02  | 1.830359e+03  |
| 33 | -4.584039e+03 | -8.748798e+02 | 2.287526e+03  |
| 34 | 7.657419e+03  | -1.822368e+03 | -6.181095e+02 |
| 35 | 1.294679e+03  | 1.281198e+02  | -2.866183e+02 |
| 36 | -5.138117e+03 | -2.868867e+03 | 5.719004e+03  |
| 37 | -2.291573e+02 | 2.335725e+02  | 2.508269e+02  |
| 38 | 1.975998e+03  | -4.150092e+03 | -5.716002e+03 |
| 39 | 4.586382e+03  | -1.445875e+03 | -7.040775e+03 |
| 40 | -1.660945e+03 | 6.928200e+02  | 7.873180e+02  |
| 41 | 8.904301e+02  | 6.812293e+02  | -1.840425e+03 |
| 42 | 1.131143e+02  | -5.798642e+02 | 5.551497e+02  |
| 43 | -6.815698e+02 | -6.336767e+02 | 1.342007e+03  |
| 44 | -3.054834e+03 | 4.026752e+03  | 5.159984e+01  |
| 45 | -2.938663e+02 | -9.365719e+02 | -3.843130e+02 |
| 46 | -1.448951e+03 | 5.199250e+03  | 8.151805e+02  |
| 47 | -3.795945e+02 | 3.187465e+02  | 1.176618e+02  |
| 48 | -3.690458e+02 | 6.907070e+03  | -2.322708e+03 |
| 49 | 2.655873e+03  | 5.398433e+03  | 3.214281e+03  |
| 50 | 1.159629e+04  | 1.686952e+03  | -4.920304e+03 |
| 51 | 6.920323e+02  | -3.898563e+02 | -1.298730e+03 |
| 52 | -7.005755e+02 | -8.785641e+03 | 1.963747e+03  |
| 53 | -3.923029e+03 | -1.592274e+03 | 1.104187e+02  |
| 54 | 3.961361e+03  | 8.411824e+03  | -4.962333e+03 |
| 55 | -3.708260e+02 | 6.546780e+02  | -6.602008e+02 |
| 56 | -3.193587e+03 | -3.620389e+03 | 1.583917e+03  |
| 57 | 7.007748e+03  | -7.839075e+03 | 1.660208e+03  |
| 58 | -5.547726e+03 | 2.095921e+03  | -1.893320e+03 |
| 59 | 2.310706e+02  | 6.578289e+02  | 2.836230e+02  |
| 60 | 9.926168e+02  | -6.422786e+03 | 2.682480e+03  |
| 61 | -6.176476e+03 | 2.987733e+03  | -5.598506e+03 |
| 62 | -4.660972e+03 | -1.722419e+03 | -2.567193e+03 |
| 63 | 9.644808e+02  | 9.722158e+02  | 7.864239e+02  |
| 64 | 4.494771e+02  | -6.999177e+03 | -7.193477e+03 |
| 65 | -3.291076e+03 | -2.046308e+03 | 1.971339e+03  |
| 66 | -4.285439e+03 | 1.062615e+03  | 8.424724e+02  |
| 67 | -8.426143e+02 | -3.365539e+03 | 1.659129e+03  |

trajectory 34

| atom | VX            | VY            | VZ            |
|------|---------------|---------------|---------------|
| 1    | -2.161348e+02 | -3.302942e+02 | -2.206335e+02 |
| 2    | 3.826327e+02  | 1.089842e+03  | 2.815831e+02  |
| 3    | -1.334007e+02 | 1.952621e+03  | -1.693454e+03 |
| 4    | 4.554563e+02  | -1.337267e+03 | 1.775116e+03  |

|    |               |               |               |
|----|---------------|---------------|---------------|
| 5  | -1.161999e+03 | -3.674831e+02 | -6.969042e+02 |
| 6  | -8.175135e+03 | -3.747971e+03 | 5.476786e+03  |
| 7  | 4.906677e+03  | 2.157237e+03  | 3.830972e+03  |
| 8  | 2.631510e+03  | 1.105929e+03  | -4.493322e+03 |
| 9  | 3.486609e+02  | 4.246390e+02  | -2.846938e+02 |
| 10 | 4.329038e+02  | -2.573730e+02 | 1.805885e+02  |
| 11 | 1.522677e+02  | -6.808710e+02 | 1.919546e+03  |
| 12 | 4.908656e+03  | 1.724327e+03  | -4.151260e+03 |
| 13 | 2.640241e+03  | -1.467842e+03 | 9.306239e+03  |
| 14 | 4.645673e+02  | 1.038889e+03  | -1.093555e+02 |
| 15 | -1.680325e+02 | -1.160498e+03 | -1.096915e+02 |
| 16 | 6.570888e+02  | 1.619199e+03  | -1.602440e+02 |
| 17 | 2.128303e+02  | -3.930549e+02 | 6.240914e+01  |
| 18 | 3.267575e+02  | 1.913688e+02  | -3.983683e+02 |
| 19 | -9.491022e+02 | 2.753060e+03  | 1.793905e+01  |
| 20 | -5.981867e+02 | -7.175660e+02 | 2.244265e+02  |
| 21 | 1.071736e+03  | 5.722368e+02  | 3.936082e+02  |
| 22 | -2.198617e+03 | -1.123816e+03 | 3.763362e+02  |
| 23 | -3.494419e+02 | -1.695456e+02 | 7.320748e+02  |
| 24 | 5.395730e+02  | 6.997482e+02  | -2.139680e+02 |
| 25 | 5.005695e+02  | -4.690802e+02 | -3.094538e+02 |
| 26 | -1.316907e+03 | -7.120096e+02 | -3.760900e+02 |
| 27 | 7.528980e+02  | 3.136902e+02  | 1.487072e+02  |
| 28 | 1.211939e+03  | 1.186910e+03  | -1.084924e+03 |
| 29 | 1.408354e+03  | -1.031724e+03 | -6.301643e+01 |
| 30 | -2.327036e+03 | 4.170640e+01  | -3.728947e+02 |
| 31 | 4.680339e+03  | -2.124455e+03 | -3.962379e+03 |
| 32 | -5.043588e+03 | 7.073205e+03  | -5.092746e+03 |
| 33 | 1.486479e+03  | -1.046958e+03 | 8.273577e+02  |
| 34 | 3.808926e+03  | -5.432865e+03 | -1.641997e+03 |
| 35 | 2.646636e+02  | -7.778842e+01 | 4.230257e+02  |
| 36 | -1.596909e+03 | -9.887692e+00 | 6.371539e+03  |
| 37 | -5.096591e+02 | -1.049802e+02 | 9.746872e+02  |
| 38 | 7.730400e+03  | 4.616307e+03  | 2.719748e+03  |
| 39 | 8.163601e+02  | -3.511256e+03 | -4.124187e+02 |
| 40 | 3.302291e+02  | 9.327419e+02  | -8.419228e+02 |
| 41 | 2.434929e+02  | -6.164593e+02 | 3.997915e+02  |
| 42 | -3.723198e+02 | -1.006857e+03 | 9.869623e+01  |
| 43 | -1.417822e+03 | 1.078876e+03  | -1.119546e+02 |
| 44 | -7.714096e+03 | -5.665314e+03 | 2.262891e+03  |
| 45 | -6.090370e+02 | 9.983458e+02  | 1.433209e+03  |
| 46 | 8.530331e+03  | -2.328107e+03 | 1.508967e+03  |
| 47 | 1.111144e+03  | 3.554633e+02  | -1.368532e+03 |
| 48 | -1.297166e+03 | -1.910753e+03 | 5.318364e+02  |
| 49 | -2.122009e+03 | -4.945952e+03 | 1.510536e+03  |
| 50 | -8.914727e+03 | -2.316069e+03 | 6.508001e+03  |



|    |               |               |               |
|----|---------------|---------------|---------------|
| 51 | 1.576734e+03  | -4.885467e+01 | -1.102394e+03 |
| 52 | -8.308646e+02 | 1.468936e+03  | 8.520188e+03  |
| 53 | -1.608150e+03 | -3.653401e+03 | -2.190662e+03 |
| 54 | -4.850932e+03 | 5.654399e+03  | -2.445626e+03 |
| 55 | -1.510216e+02 | 5.804296e+02  | -6.611181e+02 |
| 56 | 9.980060e+03  | -2.204174e+03 | 1.020710e+03  |
| 57 | 3.036440e+03  | -9.244230e+03 | -2.926793e+03 |
| 58 | 1.433357e+03  | 5.756477e+03  | 1.498549e+03  |
| 59 | -7.630685e+02 | 3.511109e+00  | 4.822311e+02  |
| 60 | -4.141594e+03 | 6.523008e+03  | 1.049748e+03  |
| 61 | -6.074101e+03 | 4.339607e+03  | -6.632917e+03 |
| 62 | 2.770745e+03  | 3.289779e+03  | -2.436663e+03 |
| 63 | -1.438250e+02 | -1.370463e+03 | -8.435974e+01 |
| 64 | 7.182456e+02  | 1.000621e+04  | 2.026016e+02  |
| 65 | 1.593703e+03  | -1.261903e+03 | -1.664677e+03 |
| 66 | 2.152612e+03  | 5.058117e+03  | -1.838314e+03 |
| 67 | -6.291365e+03 | 5.079732e+03  | -1.180153e+03 |

trajectory 35

| atom | VX            | VY            | VZ            |
|------|---------------|---------------|---------------|
| 1    | -2.665950e+02 | 1.270410e+02  | -1.029023e+02 |
| 2    | 3.103536e+02  | 2.644646e+02  | 3.729949e+02  |
| 3    | 9.305827e+02  | -3.013930e+02 | 1.205848e+03  |
| 4    | 5.494626e+02  | 5.292399e+02  | 2.123146e+02  |
| 5    | -1.086547e+03 | 3.111815e+03  | -7.917075e+01 |
| 6    | -2.816684e+03 | -7.027623e+03 | -7.244845e+01 |
| 7    | 2.225638e+03  | -4.357941e+03 | -3.426676e+03 |
| 8    | -4.558478e+02 | 9.530152e+01  | -3.986713e+03 |
| 9    | -6.057702e+01 | -2.674862e+01 | -9.214085e+02 |
| 10   | -8.258879e+02 | -1.829621e+03 | -6.678409e+01 |
| 11   | 6.027268e+02  | 2.544634e+02  | -5.795054e+02 |
| 12   | 1.835698e+03  | 3.459844e+03  | -4.560767e+03 |
| 13   | 7.895743e+03  | 4.894528e+03  | 9.451855e+02  |
| 14   | -1.294092e+01 | -7.273114e+02 | 7.754952e+02  |
| 15   | -8.031864e+01 | 8.029845e+02  | 8.518675e+02  |
| 16   | 6.061298e+02  | -7.695840e+02 | -5.875348e+02 |
| 17   | -1.829539e+02 | -2.136219e+02 | -3.120907e+01 |
| 18   | 3.883045e+02  | 3.007076e+02  | -4.352222e+02 |
| 19   | 4.807873e+02  | 1.328043e+03  | -8.322010e+01 |
| 20   | -2.351923e+01 | -1.386787e+03 | 1.202583e+03  |
| 21   | -2.621230e+02 | -1.730722e+03 | 9.178405e+02  |
| 22   | 1.668369e+02  | 1.381614e+03  | -1.190068e+03 |
| 23   | 5.148979e+02  | -5.983970e+02 | 5.238318e+02  |
| 24   | 1.138274e+03  | 9.191150e+02  | -5.883764e+02 |

|    |               |               |               |
|----|---------------|---------------|---------------|
| 25 | 2.623504e+02  | -1.455263e+03 | 2.623050e+02  |
| 26 | -4.820428e+02 | -1.673000e+02 | 2.939706e+02  |
| 27 | -3.380251e+02 | 4.278601e+02  | -3.514879e+02 |
| 28 | 3.839216e+02  | 4.973163e+02  | -7.514508e+02 |
| 29 | 1.595342e+03  | -6.420160e+02 | -6.870110e+02 |
| 30 | -1.605539e+03 | 1.432978e+02  | 8.681300e+00  |
| 31 | 2.955634e+03  | 5.536069e+03  | -3.393237e+03 |
| 32 | 1.394637e+03  | -4.041271e+03 | 9.280006e+03  |
| 33 | -1.153926e+03 | 3.376988e+03  | 9.958504e+02  |
| 34 | 3.225323e+03  | -5.787782e+03 | -5.200321e+03 |
| 35 | -3.018993e+02 | -1.647897e+03 | -1.133775e+03 |
| 36 | -4.193204e+02 | 4.708004e+03  | 1.599408e+03  |
| 37 | -1.521503e+03 | -9.508461e+02 | 1.090063e+03  |
| 38 | 4.799918e+03  | -2.656294e+03 | 8.451326e+02  |
| 39 | -3.230132e+03 | 7.444011e+03  | 4.435071e+03  |
| 40 | -2.352803e+03 | 1.639856e+03  | 7.896465e+02  |
| 41 | 1.076126e+03  | 8.093883e+02  | -7.290434e+02 |
| 42 | -3.238757e+02 | -7.991790e+02 | 2.233259e+02  |
| 43 | -9.100714e+02 | -3.568471e+01 | 4.642737e+01  |
| 44 | 4.113934e+03  | 6.642173e+03  | -4.989118e+03 |
| 45 | 8.768414e+02  | -1.261488e+03 | 2.238108e+03  |
| 46 | -3.268177e+03 | 7.932002e+03  | -7.110697e+03 |
| 47 | -2.891946e+02 | 4.719536e+01  | -1.663472e+03 |
| 48 | 8.494784e+03  | -1.271665e+03 | 5.587630e+02  |
| 49 | 5.166770e+02  | 4.364950e+02  | -2.948736e+03 |
| 50 | 1.469558e+03  | 7.709750e+01  | 1.935605e+03  |
| 51 | 2.246435e+03  | 3.622694e+02  | 1.164570e+03  |
| 52 | -4.701508e+03 | 4.849848e+03  | -3.132994e+03 |
| 53 | -7.875971e+03 | 4.912513e+02  | -3.147924e+03 |
| 54 | 2.140107e+03  | -1.330335e+03 | -1.933877e+03 |
| 55 | -3.004740e+02 | 1.545548e+03  | -9.951890e+01 |
| 56 | 8.183528e+01  | 1.658628e+02  | 7.092137e+02  |
| 57 | -7.021991e+03 | -1.773321e+03 | -4.991688e+02 |
| 58 | -8.036374e+03 | -6.215799e+03 | -1.193086e+03 |
| 59 | 1.816522e+03  | 9.021643e+02  | 1.208749e+03  |
| 60 | -1.702349e+03 | 2.610989e+03  | -3.916338e+03 |
| 61 | -2.960015e+03 | -5.886222e+03 | -8.575421e+02 |
| 62 | -9.141824e+03 | 3.270734e+03  | -2.037928e+02 |
| 63 | 1.146905e+03  | 3.918154e+01  | -6.789941e+02 |
| 64 | 1.075755e+02  | 7.266244e+03  | 4.049538e+03  |
| 65 | -3.817771e+03 | -2.659463e+03 | -2.293382e+02 |
| 66 | -4.935885e+03 | -5.497067e+03 | -1.281739e+03 |
| 67 | 5.441661e+03  | -3.033030e+03 | 1.974286e+03  |

## trajectory 36

| atom | VX            | VY            | VZ            |
|------|---------------|---------------|---------------|
| 1    | 7.296291e+01  | -2.984894e+01 | -2.254346e+01 |
| 2    | 5.509779e+02  | -5.224199e+02 | 6.179260e+02  |
| 3    | 5.517806e+02  | 1.141448e+03  | 1.835635e+02  |
| 4    | -1.033918e+02 | -6.674192e+02 | 1.493422e+02  |
| 5    | 4.328669e+02  | 4.112526e+02  | -3.433132e+02 |
| 6    | -3.089617e+03 | -6.825827e+03 | 8.313891e+03  |
| 7    | -4.219188e+03 | 1.693074e+03  | 6.505465e+02  |
| 8    | -1.964137e+03 | 5.455707e+03  | 2.809326e+03  |
| 9    | -4.232472e+02 | -1.266796e+02 | -1.923049e+03 |
| 10   | 4.873557e+02  | -2.923595e+02 | -7.242116e+01 |
| 11   | -1.763821e+03 | -7.846319e+02 | 1.224452e+03  |
| 12   | 5.010306e+03  | 7.592896e+03  | 2.428156e+02  |
| 13   | -3.015528e+03 | 5.551655e+01  | 5.726256e+03  |
| 14   | -6.866980e+02 | -8.137286e+01 | 8.439513e+01  |
| 15   | -1.193391e+03 | 2.293070e+01  | 5.607210e+02  |
| 16   | 4.835619e+02  | 1.461650e+03  | 9.646824e+02  |
| 17   | -9.010814e+01 | 3.120310e+02  | 3.243629e+02  |
| 18   | -1.474260e+03 | 9.133026e+01  | -1.192291e+03 |
| 19   | 1.867487e+03  | -2.435904e+02 | 1.993401e+03  |
| 20   | -1.058781e+03 | -3.383940e+02 | -2.574046e+02 |
| 21   | 1.491884e+03  | -1.217801e+03 | 2.023895e+02  |
| 22   | 5.791444e+02  | 1.850570e+02  | -1.596482e+02 |
| 23   | -1.686252e+03 | 7.252749e+02  | -4.452724e+02 |
| 24   | 4.532594e+02  | 8.789636e+01  | -6.235591e+02 |
| 25   | 1.490275e+03  | -1.083612e+03 | -9.927400e+02 |
| 26   | 2.079663e+02  | 6.344961e+02  | -1.199815e+03 |
| 27   | 5.948028e+02  | 1.296946e+03  | -1.780240e+02 |
| 28   | -1.014074e+03 | -9.589847e+02 | 1.941029e+02  |
| 29   | -6.073330e+02 | -2.068163e+02 | -2.171116e+02 |
| 30   | 2.451704e+03  | -6.115745e+02 | 1.069304e+03  |
| 31   | -9.856750e+03 | 3.470316e+03  | 1.110769e+03  |
| 32   | -3.163018e+03 | -2.390342e+03 | 3.886441e+03  |
| 33   | -7.364289e+03 | 2.459446e+02  | 1.143381e+03  |
| 34   | 3.576238e+03  | -4.174409e+03 | -3.428124e+03 |
| 35   | -2.465735e+02 | 4.640576e+02  | -2.307205e+02 |
| 36   | -3.766639e+03 | -6.345165e+03 | 5.123767e+03  |
| 37   | -1.087437e+03 | 1.512162e+03  | -1.339428e+03 |
| 38   | 8.622021e+03  | 2.499303e+02  | 1.093037e+03  |
| 39   | -4.025946e+02 | -3.976975e+03 | -1.475215e+03 |
| 40   | 9.333842e+02  | -7.553567e+02 | -7.917018e+02 |
| 41   | -5.932094e+02 | -6.818214e+02 | 2.795843e+02  |
| 42   | 1.389149e+02  | -1.170784e+03 | -1.825948e+01 |
| 43   | 7.739292e+02  | -6.687478e+02 | 5.537136e+02  |
| 44   | -1.765482e+03 | 9.849587e+02  | 2.592762e+03  |

|    |               |               |               |
|----|---------------|---------------|---------------|
| 45 | 2.512203e+02  | 6.845244e+02  | 2.284230e+02  |
| 46 | 8.463719e+03  | 3.553748e+03  | -5.295776e+03 |
| 47 | -1.270120e+03 | 1.594828e+03  | 4.928751e+02  |
| 48 | -4.579843e+03 | 3.842883e+03  | -2.373017e+03 |
| 49 | 3.931825e+03  | -4.488802e+03 | -4.768143e+03 |
| 50 | 7.582307e+03  | -3.365319e+03 | -4.566612e+03 |
| 51 | 5.425194e+00  | -8.302850e+02 | -1.279896e+03 |
| 52 | 5.151696e+03  | -5.954108e+01 | -8.441449e+02 |
| 53 | -1.519445e+02 | -2.406982e+03 | 4.876346e+03  |
| 54 | -5.570396e+03 | 7.908222e+03  | -2.591916e+03 |
| 55 | -5.919326e+01 | -3.075047e+02 | -1.971363e+02 |
| 56 | 4.948470e+03  | 3.203846e+03  | -7.130096e+03 |
| 57 | 5.636184e+03  | -3.532567e+03 | 5.626382e+03  |
| 58 | -1.793495e+03 | -8.261078e+03 | -9.799908e+02 |
| 59 | 9.606516e+02  | -2.120581e+02 | 2.249958e+02  |
| 60 | -3.864649e+03 | -5.126158e+03 | -6.256075e+03 |
| 61 | -2.698652e+03 | 4.979736e+03  | -5.132004e+03 |
| 62 | -3.102992e+03 | -1.974374e+02 | 4.444689e+03  |
| 63 | 1.549460e+02  | 3.249246e+02  | 1.043286e+03  |
| 64 | 6.006690e+02  | -4.828466e+03 | -7.042702e+03 |
| 65 | -9.794441e+02 | 2.467831e+03  | 3.232051e+03  |
| 66 | -3.444369e+03 | -1.974426e+03 | 2.924586e+02  |
| 67 | 5.153978e+03  | -5.432249e+03 | 3.381239e+03  |

trajectory 37

| atom | VX            | VY            | VZ            |
|------|---------------|---------------|---------------|
| 1    | -6.138369e+01 | 2.937582e+02  | 3.190001e+02  |
| 2    | 5.967182e+02  | 6.180566e+02  | -1.852004e+01 |
| 3    | 7.664703e+02  | -5.984547e+02 | -4.778774e+02 |
| 4    | -3.511766e+02 | -8.415647e+02 | -1.191550e+03 |
| 5    | 1.332706e+03  | -8.042466e+02 | -6.910291e+02 |
| 6    | -2.101372e+03 | 4.231685e+02  | 1.539100e+03  |
| 7    | 3.075715e+02  | 2.910729e+03  | 7.289576e+03  |
| 8    | -3.535992e+03 | -8.559381e+03 | -3.767501e+02 |
| 9    | -5.986706e+01 | -1.925644e+02 | 1.717693e+03  |
| 10   | -8.658683e+02 | 3.958384e+02  | 1.355550e+02  |
| 11   | 2.911861e+02  | 8.677174e+02  | -1.310082e+03 |
| 12   | 1.836881e+03  | 2.022473e+03  | -7.871046e+03 |
| 13   | 1.013125e+04  | 2.065031e+03  | 2.675587e+02  |
| 14   | -4.686418e+02 | -7.793415e+02 | 6.923537e+02  |
| 15   | -8.408189e+02 | 1.064480e+03  | -5.339827e+02 |
| 16   | -5.272080e+02 | -4.199090e+02 | 6.500528e+02  |
| 17   | -4.685923e+00 | -1.175410e+02 | 1.460741e+02  |
| 18   | -1.168577e+03 | -6.919080e+02 | -9.334329e+00 |

|    |               |               |               |
|----|---------------|---------------|---------------|
| 19 | 1.638236e+03  | 2.577496e+03  | -6.664374e+02 |
| 20 | 6.000500e+02  | -1.547183e+03 | 3.160238e+01  |
| 21 | -1.433948e+03 | 4.406035e+02  | -8.859453e+02 |
| 22 | 1.274100e+03  | -1.702370e+02 | 3.172655e+02  |
| 23 | 3.404782e+02  | 1.982884e+02  | 9.072885e+02  |
| 24 | -3.985156e+01 | 8.220115e+02  | 4.308202e+02  |
| 25 | -7.351097e+02 | -1.306103e+03 | 4.727200e+02  |
| 26 | 6.937642e+02  | -7.983958e+01 | 8.762284e+02  |
| 27 | -3.744640e+02 | -4.244429e+02 | 1.167936e+03  |
| 28 | 4.373723e+02  | 1.025424e+03  | 6.558958e+02  |
| 29 | -1.298830e+03 | 1.606080e+03  | -2.729757e+02 |
| 30 | 1.184353e+03  | 7.163214e+02  | -2.095327e+03 |
| 31 | -2.899216e+03 | 3.654044e+02  | 4.845518e+03  |
| 32 | 2.152642e+03  | -1.200253e+03 | -7.459100e+01 |
| 33 | -2.638388e+03 | 2.873528e+03  | -7.455212e+03 |
| 34 | 7.387841e+03  | -3.681899e+02 | 2.405022e+03  |
| 35 | 5.642678e+01  | -8.441349e+02 | -5.397423e+01 |
| 36 | -4.343278e+03 | -5.956115e+03 | 5.045140e+03  |
| 37 | 1.292401e+02  | -6.688149e+02 | -5.864133e+02 |
| 38 | -4.798881e+03 | -3.807465e+03 | -5.984499e+03 |
| 39 | 4.063695e+03  | 3.632409e+03  | 4.115750e+03  |
| 40 | -1.025392e+03 | -1.745886e+03 | 5.106772e+02  |
| 41 | -4.600562e+02 | -8.906201e+02 | -6.997066e+00 |
| 42 | 6.345050e+02  | 2.717178e+02  | -1.177759e+03 |
| 43 | -3.302880e+02 | 1.681975e+03  | 9.354516e+02  |
| 44 | 1.025571e+04  | -1.980416e+03 | -1.001150e+02 |
| 45 | -1.210634e+03 | 9.354456e+02  | 5.009045e+02  |
| 46 | -5.182672e+02 | -4.080453e+03 | -2.471860e+02 |
| 47 | -3.711039e+01 | -3.374672e+02 | -4.602545e+02 |
| 48 | 8.141623e+02  | 1.492494e+03  | 1.377281e+02  |
| 49 | 1.049708e+04  | 1.547781e+03  | -6.908414e+03 |
| 50 | 3.494110e+03  | 6.939531e+02  | -3.436057e+01 |
| 51 | 1.593837e+03  | -2.026357e+02 | 6.467286e+02  |
| 52 | -4.300713e+03 | -1.375792e+03 | -3.630535e+03 |
| 53 | -7.523203e+03 | -1.437420e+03 | -7.148946e+03 |
| 54 | -2.707401e+03 | -4.126471e+03 | -2.870960e+03 |
| 55 | 4.178176e+02  | -1.158952e+03 | 2.227778e+02  |
| 56 | -2.741185e+03 | 2.836679e+03  | -8.102976e+03 |
| 57 | -4.043464e+03 | 7.604784e+03  | 7.260755e+02  |
| 58 | 3.052235e+03  | 2.329469e+03  | -3.937870e+03 |
| 59 | 4.503653e+02  | 1.403417e+02  | -4.449794e+02 |
| 60 | 1.248000e+03  | 1.109288e+04  | -3.584907e+03 |
| 61 | -3.091345e+03 | -3.557355e+03 | -3.170773e+03 |
| 62 | -2.591025e+03 | 1.545658e+03  | 5.339456e+02  |
| 63 | -1.387302e+03 | 2.675594e+02  | -1.698377e+03 |
| 64 | 5.834876e+03  | -3.880271e+03 | -5.793525e+03 |

|    |               |               |               |
|----|---------------|---------------|---------------|
| 65 | 4.424878e+03  | 1.447229e+03  | -2.533970e+03 |
| 66 | 5.777128e+03  | -1.880395e+03 | 1.061518e+03  |
| 67 | -5.011314e+03 | -7.544364e+03 | 1.975067e+03  |

trajectory 38

| atom | VX            | VY            | VZ            |
|------|---------------|---------------|---------------|
| 1    | 6.539097e+00  | -8.220973e+00 | -1.193428e+02 |
| 2    | -5.276349e+01 | -1.100906e+03 | 1.016784e+03  |
| 3    | 1.821463e+02  | -2.569824e+02 | 3.548909e+02  |
| 4    | -1.025406e+03 | -7.942219e+02 | 1.190540e+02  |
| 5    | 1.183893e+03  | -5.948170e+02 | 2.750639e+03  |
| 6    | -5.588914e+02 | 3.994033e+03  | 1.974389e+03  |
| 7    | -5.084727e+03 | 2.449227e+03  | -7.264030e+03 |
| 8    | -7.453049e+03 | -5.293966e+03 | -2.359306e+03 |
| 9    | 1.793636e+02  | 1.118326e+02  | -1.484198e+03 |
| 10   | -3.298328e+02 | -2.444817e+02 | 6.318946e+02  |
| 11   | -1.000638e+03 | 1.884374e+03  | -9.840323e+02 |
| 12   | 7.287787e+02  | -1.076867e+04 | -1.323093e+02 |
| 13   | 7.805113e+02  | -2.839989e+02 | -6.513721e+03 |
| 14   | -1.235781e+02 | 9.399716e+02  | 9.516834e+02  |
| 15   | -1.005413e+03 | 1.552694e+03  | -8.865041e+02 |
| 16   | -7.466164e+02 | -3.179735e+02 | 3.200103e+02  |
| 17   | 3.691030e+02  | 1.162255e+01  | 1.431184e+01  |
| 18   | -1.124992e+03 | -4.497413e+02 | -5.795341e+01 |
| 19   | 1.795755e+03  | -2.158809e+02 | 4.926479e+02  |
| 20   | -8.144421e+02 | 8.502058e+02  | -2.253054e+02 |
| 21   | -6.536531e+01 | 1.231040e+02  | 1.633029e+02  |
| 22   | -1.894885e+01 | 1.694918e+03  | -4.724159e+02 |
| 23   | 2.009145e+02  | -1.172747e+03 | 8.344534e+01  |
| 24   | 1.033318e+03  | -6.791701e+02 | -6.739036e+02 |
| 25   | -1.077339e+03 | -4.207646e+02 | 5.896709e+02  |
| 26   | -1.313207e+03 | -1.155214e+03 | 4.274283e+02  |
| 27   | 7.533159e+02  | -1.206747e+03 | -1.120691e+03 |
| 28   | 6.621729e+02  | 2.853939e+02  | 8.179076e+02  |
| 29   | 5.644072e+02  | -9.200885e+02 | 5.255700e+02  |
| 30   | -1.188620e+03 | 7.533357e+02  | -6.689018e+01 |
| 31   | -5.545707e+03 | -5.293479e+03 | 3.770934e+03  |
| 32   | -4.710080e+03 | 2.601177e+03  | -1.113632e+04 |
| 33   | -3.660438e+03 | 6.082683e+02  | -2.239475e+03 |
| 34   | -2.989506e+03 | 7.502433e+03  | -7.455866e+02 |
| 35   | 1.355301e+03  | 1.549137e+03  | 6.654630e+02  |
| 36   | -6.099378e+02 | -1.375686e+03 | -5.785539e+02 |
| 37   | -6.965045e+02 | -1.742217e+03 | -5.172317e+02 |
| 38   | 3.745688e+03  | 7.272690e+03  | 3.668357e+03  |

|    |               |               |               |
|----|---------------|---------------|---------------|
| 39 | -1.642920e+02 | 2.300564e+02  | -6.828735e+03 |
| 40 | 2.032027e+03  | -4.058053e+02 | 3.512491e+02  |
| 41 | -1.510779e+03 | -6.100762e+02 | -4.017764e+02 |
| 42 | -8.316097e+02 | 7.268132e+02  | 5.786015e+02  |
| 43 | 3.457572e+02  | -1.167131e+02 | 1.971775e+02  |
| 44 | 3.600054e+03  | 2.560676e+03  | -5.077385e+03 |
| 45 | 2.097874e+03  | 8.780677e+02  | -1.674826e+03 |
| 46 | -3.877306e+03 | -6.331890e+03 | 2.052775e+03  |
| 47 | 4.090879e+01  | 3.054030e+02  | 6.266319e+02  |
| 48 | 6.159618e+02  | 1.726662e+03  | 1.141985e+03  |
| 49 | -3.554040e+03 | -7.144820e+03 | 2.310459e+03  |
| 50 | 2.653364e+03  | 6.943985e+02  | -2.412921e+03 |
| 51 | 3.477566e+02  | -6.206084e+02 | 2.933112e+02  |
| 52 | 2.274441e+03  | 1.514428e+03  | -6.635577e+03 |
| 53 | 3.874808e+03  | 1.381202e+03  | 2.003582e+02  |
| 54 | -1.176588e+03 | -9.659516e+03 | 1.501986e+03  |
| 55 | -1.064029e+03 | 6.312765e+01  | -3.754694e+02 |
| 56 | 2.468323e+03  | 3.301433e+03  | -4.083799e+03 |
| 57 | -8.101756e+03 | 3.575168e+03  | 4.501571e+03  |
| 58 | -5.908773e+02 | 2.851362e+03  | 7.287208e+03  |
| 59 | -6.656686e+02 | 2.128267e+03  | 1.050593e+03  |
| 60 | -3.317048e+03 | 3.109036e+03  | 7.864835e+02  |
| 61 | 1.273180e+03  | -7.504105e+02 | -1.386418e+03 |
| 62 | 9.616935e+03  | -9.847884e+02 | -1.977935e+03 |
| 63 | 1.384804e+03  | -7.147876e+02 | 5.658312e+02  |
| 64 | -6.273551e+03 | 1.446358e+03  | -4.594864e+03 |
| 65 | 6.906631e+03  | 3.566161e+03  | -8.262496e+03 |
| 66 | -8.655291e+02 | 2.791926e+03  | 3.341178e+03  |
| 67 | 2.591547e+03  | 3.194407e+03  | -3.243392e+03 |

trajectory 39

| atom | VX            | VY            | VZ            |
|------|---------------|---------------|---------------|
| 1    | 8.473580e+01  | -5.336995e+01 | -1.381818e+02 |
| 2    | -7.284839e+01 | 5.021121e+02  | 6.993237e+02  |
| 3    | 7.807294e+02  | 6.672933e+02  | -1.051387e+03 |
| 4    | -2.734814e+02 | 8.942845e+02  | -8.280236e+02 |
| 5    | 8.337659e+02  | 1.386466e+03  | 7.620171e+02  |
| 6    | 1.917407e+03  | -9.052641e+03 | 4.351112e+03  |
| 7    | 2.022399e+03  | -6.410194e+03 | -3.728540e+03 |
| 8    | -6.812075e+02 | -9.703805e+02 | -8.239489e+01 |
| 9    | 2.981680e+02  | 3.395136e+02  | 5.839750e+02  |
| 10   | -2.066358e+03 | -1.958104e+02 | 1.160089e+03  |
| 11   | 4.481826e+02  | -4.634884e+02 | -3.624463e+02 |
| 12   | 2.587909e+03  | 5.678813e+03  | -1.515907e+03 |

|    |               |               |               |
|----|---------------|---------------|---------------|
| 13 | 1.376418e+03  | 6.911611e+03  | -1.340204e+03 |
| 14 | 6.623172e+02  | -4.031582e+02 | 4.345411e+02  |
| 15 | -3.068585e+03 | 2.529176e+02  | -1.174301e+03 |
| 16 | 5.953106e+02  | 7.211713e+02  | 6.887220e+02  |
| 17 | -1.463230e+02 | -3.930461e+02 | 3.259150e+02  |
| 18 | -1.261753e+03 | 1.060634e+03  | -2.554081e+02 |
| 19 | 3.521816e+02  | -1.037900e+03 | 6.583554e+02  |
| 20 | 9.520276e+02  | 1.033653e+03  | -7.860615e+02 |
| 21 | -1.027054e+03 | -3.166004e+02 | 1.216003e+01  |
| 22 | 1.009826e+03  | 1.018517e+02  | 8.356486e+01  |
| 23 | 1.183595e+03  | -1.366934e+03 | -1.263773e+02 |
| 24 | -4.450366e+02 | -2.363149e+02 | 4.396781e+02  |
| 25 | -4.639799e+02 | -8.944107e+02 | -5.311743e+02 |
| 26 | -2.477611e+02 | 1.875029e+02  | -3.892349e+02 |
| 27 | 6.994770e+02  | -4.436414e+02 | 1.832133e+03  |
| 28 | -9.750281e+02 | 8.184057e+02  | -6.066747e+02 |
| 29 | 2.404199e+02  | -1.266131e+03 | -4.493573e+02 |
| 30 | 3.281316e+01  | -2.596580e+02 | -4.382654e+02 |
| 31 | -3.152660e+03 | -4.159253e+03 | 3.978672e+03  |
| 32 | -7.199998e+03 | 1.042909e+04  | 7.283064e+02  |
| 33 | 2.968963e+03  | 4.101109e+03  | -4.350329e+03 |
| 34 | 4.993247e+03  | -4.540453e+03 | 2.239503e+03  |
| 35 | 1.536090e+03  | -1.095394e+03 | -2.475945e+02 |
| 36 | -1.985124e+03 | -1.931695e+03 | -8.721809e+02 |
| 37 | -3.454881e+02 | -3.542085e+02 | 6.114296e+02  |
| 38 | 9.255165e+03  | -3.110784e+03 | 3.497157e+03  |
| 39 | 4.977894e+03  | 2.963881e+03  | -3.663165e+03 |
| 40 | -1.516345e+03 | 6.118585e+02  | 8.737902e+02  |
| 41 | -2.437486e+03 | 2.065100e+02  | 4.089566e+01  |
| 42 | 1.443674e+03  | -5.409632e+02 | -1.665539e+03 |
| 43 | 1.742358e+03  | 1.643823e+02  | 1.341194e+02  |
| 44 | 2.816929e+03  | 3.531688e+03  | 2.053394e+03  |
| 45 | 1.074032e+03  | 1.052131e+03  | -7.769423e+02 |
| 46 | 7.972553e+02  | 3.901762e+03  | -2.874092e+03 |
| 47 | -8.163325e+02 | 4.818853e+02  | -6.564370e+02 |
| 48 | 3.320358e+03  | -9.581416e+03 | 7.982587e+03  |
| 49 | -5.258042e+03 | 8.744295e+02  | -8.478238e+02 |
| 50 | 7.946018e+02  | -3.803450e+03 | -5.127527e+02 |
| 51 | -2.859752e+01 | -5.622290e+01 | 3.909801e+02  |
| 52 | 6.478608e+03  | 8.909051e+02  | -7.775893e+03 |
| 53 | -5.052998e+03 | -6.183584e+03 | 2.619455e+03  |
| 54 | -2.934025e+03 | -2.997018e+02 | -3.274900e+03 |
| 55 | 1.239900e+03  | 1.204374e+03  | 1.489707e+03  |
| 56 | -9.705249e+02 | -4.749193e+02 | 5.628234e+02  |
| 57 | -7.685878e+03 | 1.948037e+03  | -3.029486e+03 |
| 58 | -1.103722e+04 | -4.643614e+03 | 2.737631e+03  |



|    |               |               |               |
|----|---------------|---------------|---------------|
| 59 | 1.574726e+03  | 5.215112e+02  | -4.420597e+02 |
| 60 | -5.035266e+03 | -7.971509e+03 | -6.364474e+02 |
| 61 | 3.385008e+03  | -2.132085e+03 | -7.681876e+02 |
| 62 | 4.364938e+03  | -2.355307e+03 | -9.861462e+02 |
| 63 | -8.113200e+02 | 1.545443e+03  | -2.032434e+03 |
| 64 | 5.625904e+02  | 1.889524e+03  | -2.407603e+02 |
| 65 | -3.299038e+03 | 7.309837e+02  | 8.659769e+03  |
| 66 | -2.284205e+03 | -7.646973e+02 | 1.168476e+03  |
| 67 | -1.513978e+03 | 5.118862e+03  | 5.570208e+02  |

trajectory 40

| atom | VX            | VY            | VZ            |
|------|---------------|---------------|---------------|
| 1    | 1.151267e+02  | -1.725954e+02 | 1.328730e+02  |
| 2    | -1.088279e+03 | 3.464802e+02  | 9.573654e+02  |
| 3    | 1.024632e+03  | -5.914863e+02 | -1.259236e+03 |
| 4    | -2.833497e+02 | 7.764035e+02  | 7.442667e+02  |
| 5    | 1.174745e+03  | 1.737384e+02  | -2.461210e+03 |
| 6    | -8.636139e+03 | 4.775506e+03  | 8.388351e+03  |
| 7    | -2.512293e+03 | 3.571670e+03  | -3.276593e+03 |
| 8    | -2.292317e+02 | -1.046193e+03 | 2.598313e+03  |
| 9    | 5.068243e+02  | -5.326416e+02 | 5.178041e+02  |
| 10   | -8.308617e+01 | -4.335012e+02 | -3.616334e+02 |
| 11   | 4.962054e+02  | -1.490860e+03 | -1.139967e+03 |
| 12   | -1.212921e+03 | -4.741339e+03 | 3.935454e+03  |
| 13   | 4.634105e+03  | 1.010680e+03  | -4.568752e+03 |
| 14   | -2.522972e+02 | 9.328128e+02  | 1.547440e+03  |
| 15   | 5.098230e+02  | -2.649503e+02 | -7.945707e+02 |
| 16   | -6.868611e+02 | 7.962125e+02  | 3.714011e+02  |
| 17   | -7.317784e+01 | -2.860853e+02 | 2.221412e+02  |
| 18   | 4.596509e+02  | -1.005812e+03 | -5.114318e+02 |
| 19   | 9.316929e+02  | 1.255838e+03  | -8.959329e+02 |
| 20   | -1.006428e+03 | 8.072100e+02  | -1.262285e+02 |
| 21   | -4.974429e+02 | -1.115446e+03 | -9.937371e+01 |
| 22   | 1.253514e+02  | 2.501541e+03  | 1.017591e+03  |
| 23   | -4.201831e+02 | 4.133990e+02  | -1.516009e+02 |
| 24   | 1.876654e+03  | 5.054284e+02  | -7.261213e+02 |
| 25   | -1.022046e+03 | 9.950455e+02  | -4.072846e+02 |
| 26   | 7.083268e+02  | -9.587522e+02 | -1.238484e+02 |
| 27   | 1.386098e+03  | 1.540778e+03  | -1.854156e+03 |
| 28   | -2.015621e+03 | -8.563193e+02 | -2.651408e+02 |
| 29   | 3.258459e+02  | -4.827664e+02 | 9.492331e+02  |
| 30   | -2.208373e+02 | 9.037568e+01  | 4.734491e+02  |
| 31   | -5.523754e+03 | -1.156735e+04 | -2.920310e+03 |
| 32   | -2.445953e+03 | 2.110200e+03  | -1.112785e+03 |

|    |               |               |               |
|----|---------------|---------------|---------------|
| 33 | 2.778447e+03  | 1.460403e+03  | -1.719946e+03 |
| 34 | -4.739659e+03 | 2.842398e+03  | 9.546799e+02  |
| 35 | -7.087355e+02 | -8.395163e+02 | 5.938431e+02  |
| 36 | 4.692207e+03  | 3.318834e+03  | -7.072604e+03 |
| 37 | 1.365473e+03  | -2.363333e+02 | 6.860615e+02  |
| 38 | -7.585202e+03 | 4.984006e+01  | -2.098931e+03 |
| 39 | -3.802633e+02 | 5.381587e+03  | -2.976547e+02 |
| 40 | -5.976828e+02 | 1.752144e+03  | 1.545943e+02  |
| 41 | -6.210460e+02 | -1.807750e+03 | 3.812446e+02  |
| 42 | -1.277427e+02 | 7.279171e+02  | -2.000433e+03 |
| 43 | -1.142501e+03 | -7.793167e+02 | 1.507541e+03  |
| 44 | 7.749240e+03  | 1.875924e+03  | -3.924564e+03 |
| 45 | -5.556912e+02 | -1.074598e+03 | -2.085841e+02 |
| 46 | -4.151009e+03 | 3.433231e+03  | 3.654014e+03  |
| 47 | 1.249265e+03  | 7.507255e+02  | -6.982526e+02 |
| 48 | -6.731939e+03 | 7.193563e+03  | 4.594549e+01  |
| 49 | -2.391525e+03 | -1.853839e+03 | 2.225229e+03  |
| 50 | 2.361197e+03  | 1.107134e+02  | 4.607423e+03  |
| 51 | -1.287024e+03 | -1.146309e+02 | 6.019275e+02  |
| 52 | -3.283470e+03 | 2.159224e+03  | -5.625348e+02 |
| 53 | 1.078327e+04  | 4.034900e+03  | -5.910210e+02 |
| 54 | 1.563578e+03  | 1.565428e+03  | 5.993772e+02  |
| 55 | -5.689589e+02 | -1.217554e+03 | -7.303153e+02 |
| 56 | 8.787989e+03  | -2.274912e+03 | -3.144393e+03 |
| 57 | -4.396417e+03 | 5.838987e+03  | 2.961966e+03  |
| 58 | 1.494811e+03  | -5.060246e+02 | 3.223745e+03  |
| 59 | 9.475892e+02  | 4.224451e+02  | 9.696049e+02  |
| 60 | 2.838355e+03  | -6.997276e+02 | -1.356423e+03 |
| 61 | 7.083032e+03  | 1.650306e+03  | -5.831745e+02 |
| 62 | -9.921201e+03 | 3.804376e+03  | -1.646095e+03 |
| 63 | -5.460153e+01 | 3.889045e+02  | 2.374728e+02  |
| 64 | 1.607825e+03  | -7.932433e+03 | 1.768586e+03  |
| 65 | 1.495090e+03  | -2.807896e+03 | -6.098389e+03 |
| 66 | 5.135514e+03  | 2.963183e+03  | 3.009926e+03  |
| 67 | -2.937043e+03 | 2.303801e+03  | -1.987778e+03 |

trajectory 41

| atom | VX            | VY            | VZ            |
|------|---------------|---------------|---------------|
| 1    | 2.335952e+02  | -3.252578e+02 | -5.965872e+00 |
| 2    | -7.342048e+02 | -7.798650e+02 | 9.816997e+02  |
| 3    | -1.061439e+02 | 9.684677e+02  | -1.007716e+03 |
| 4    | 4.565290e+01  | 7.785310e+02  | -8.931038e+02 |
| 5    | -1.141828e+02 | 5.535856e+02  | 1.157588e+03  |
| 6    | 6.961291e+03  | 8.034465e+02  | -9.222669e+03 |

|    |               |               |               |
|----|---------------|---------------|---------------|
| 7  | -1.865470e+03 | -5.653160e+03 | 1.490402e+03  |
| 8  | -8.719433e+02 | -4.083902e+03 | 2.271614e+03  |
| 9  | -6.700841e+02 | 2.819091e+02  | 5.652090e+02  |
| 10 | -6.343945e+02 | -9.127943e+01 | -6.573649e+02 |
| 11 | 9.246245e+02  | -1.398388e+03 | 1.597071e+02  |
| 12 | 2.040145e+02  | 5.515896e+03  | -3.049750e+03 |
| 13 | 1.104162e+03  | -3.173945e+03 | 6.587891e+03  |
| 14 | 8.954797e+02  | 1.217548e+03  | 3.585722e+02  |
| 15 | -2.819172e+02 | -5.235771e+02 | -1.308330e+03 |
| 16 | -1.217828e+03 | 5.600166e+02  | 4.792522e+02  |
| 17 | -4.685070e+01 | -1.090401e+02 | -1.051837e+02 |
| 18 | -3.987051e+02 | -4.924653e+01 | 4.522268e+02  |
| 19 | -1.818581e+03 | -9.738952e+02 | 5.428062e+02  |
| 20 | 4.505293e+02  | 9.413028e+02  | -3.176692e+02 |
| 21 | 1.365362e+02  | -2.921312e+02 | -2.824394e+02 |
| 22 | -1.269036e+03 | -3.784159e+02 | 6.143894e+02  |
| 23 | -2.084412e+02 | -1.918735e+02 | 7.713039e+02  |
| 24 | -3.279123e+02 | -6.799006e+02 | -1.517822e+03 |
| 25 | 7.823550e+02  | 2.040377e+03  | 7.251569e+02  |
| 26 | -9.047707e+02 | 1.210196e+02  | 9.287388e+01  |
| 27 | -2.068273e+02 | 9.990714e+02  | 1.141426e+03  |
| 28 | -2.115726e+03 | 2.308419e+02  | -1.419201e+02 |
| 29 | -1.195515e+02 | 2.255820e+00  | -1.448159e+01 |
| 30 | -2.748873e+02 | 8.564037e+02  | -1.768689e+02 |
| 31 | 7.756934e+03  | 8.875100e+02  | -3.824096e+03 |
| 32 | 9.916020e+03  | 7.485887e+03  | -5.095360e+02 |
| 33 | -5.155125e+03 | -1.417731e+03 | -2.108155e+03 |
| 34 | 3.600855e+03  | -6.298850e+03 | -4.387435e+02 |
| 35 | 7.574859e+02  | 1.512231e+02  | 1.139007e+02  |
| 36 | 9.520582e+03  | 1.300033e+03  | -4.977051e+03 |
| 37 | 1.534316e+03  | -5.756374e+02 | -2.040459e+02 |
| 38 | -3.319494e+03 | -1.937069e+03 | -5.911781e+03 |
| 39 | -7.184895e+02 | -3.186568e+03 | 5.216940e+03  |
| 40 | -6.066177e+02 | 1.076655e+03  | 1.689201e+02  |
| 41 | -1.567942e+03 | 7.712600e+02  | -3.748143e+02 |
| 42 | -7.751484e+02 | -7.389335e+02 | 1.620752e+03  |
| 43 | 1.052377e+02  | -6.157814e+02 | -4.079996e+02 |
| 44 | 1.158542e+04  | 7.513839e+03  | 2.230841e+02  |
| 45 | 8.457626e+02  | 1.437123e+02  | 1.202173e+03  |
| 46 | 1.352110e+03  | 2.205932e+03  | 3.964521e+03  |
| 47 | 4.196242e+01  | -5.971987e+02 | -1.138338e+03 |
| 48 | 3.178149e+03  | 8.287061e+03  | -3.907150e+03 |
| 49 | 1.876136e+03  | -4.205357e+03 | 2.172547e+03  |
| 50 | -1.665509e+03 | -5.556770e+03 | 1.840809e+03  |
| 51 | 7.390496e+02  | 6.556959e+02  | 5.065145e+02  |
| 52 | 1.405901e+03  | -2.058034e+01 | -4.258833e+02 |

|    |               |               |               |
|----|---------------|---------------|---------------|
| 53 | 8.627139e+03  | -1.263237e+03 | 9.895563e+03  |
| 54 | -2.423076e+03 | -2.095854e+03 | -3.948587e+03 |
| 55 | 1.074458e+03  | -1.754286e+02 | -1.014786e+03 |
| 56 | -6.628581e+02 | 1.561293e+03  | 4.667252e+03  |
| 57 | 4.277078e+03  | 5.974358e+03  | 8.637081e+03  |
| 58 | -1.318637e+03 | 1.508133e+03  | -4.998197e+03 |
| 59 | -2.704353e+02 | -1.220923e+03 | -5.386314e+02 |
| 60 | 6.618142e+03  | 6.899792e+03  | -2.463640e+03 |
| 61 | 2.371121e+03  | 4.574760e+03  | -2.553819e+02 |
| 62 | -3.354149e+03 | -3.239913e+03 | 2.592170e+03  |
| 63 | 2.156423e+02  | -8.162983e+02 | -1.636890e+03 |
| 64 | -5.155089e+03 | 2.494181e+03  | 1.022608e+04  |
| 65 | 3.161162e+03  | -1.564443e+03 | -4.114437e+03 |
| 66 | 3.960717e+03  | -1.158827e+03 | 2.197485e+03  |
| 67 | 9.993894e+02  | -5.268706e+03 | 4.385184e+02  |

trajectory 42

| atom | VX            | VY            | VZ            |
|------|---------------|---------------|---------------|
| 1    | 2.178060e+02  | 1.020547e+02  | 3.053091e+02  |
| 2    | -2.314410e+02 | 3.915958e+02  | 9.376649e+02  |
| 3    | 1.161796e+03  | -1.572253e+03 | -1.050144e+03 |
| 4    | -5.725172e+02 | -1.506506e+01 | 4.513407e+02  |
| 5    | 1.225015e+02  | 5.071335e+00  | -2.736306e+03 |
| 6    | -4.859281e+03 | -1.818289e+03 | 7.092281e+03  |
| 7    | -2.000758e+02 | 1.926019e+03  | 5.624156e+01  |
| 8    | -2.624632e+03 | -3.093880e+03 | 5.419277e+03  |
| 9    | -5.439305e+02 | 1.047004e+03  | 9.940092e+02  |
| 10   | -1.686904e+03 | 1.469924e+03  | -1.451548e+03 |
| 11   | 6.989636e+02  | 3.493353e+02  | 3.504841e+01  |
| 12   | -2.256269e+03 | -1.139438e+04 | 3.847860e+02  |
| 13   | -1.285217e+03 | -4.191592e+03 | 4.517779e+03  |
| 14   | -7.385051e+02 | -8.991889e+02 | 1.145804e+02  |
| 15   | 1.085688e+03  | 3.821795e+01  | -2.791709e+03 |
| 16   | -2.911371e+02 | -4.230623e+02 | -2.152575e+02 |
| 17   | 1.531440e+02  | -4.526749e+01 | 2.435665e+01  |
| 18   | 1.615564e+02  | -4.851002e+02 | -6.515872e+02 |
| 19   | -1.809274e+02 | -3.293694e+02 | -6.480877e+02 |
| 20   | 6.705144e+02  | 2.379079e+02  | -5.052114e+02 |
| 21   | -1.432557e+02 | 1.423382e+03  | -8.555160e+00 |
| 22   | -1.840159e+03 | -2.547723e+02 | 1.180946e+03  |
| 23   | 1.646409e+03  | 2.040233e+02  | 2.914119e+02  |
| 24   | 1.111380e+03  | 4.703489e+02  | -2.676111e+01 |
| 25   | -9.171703e+02 | 5.305855e+02  | 5.751389e+02  |
| 26   | 3.798039e+02  | -6.736400e+02 | -1.661554e+03 |

|    |               |               |               |
|----|---------------|---------------|---------------|
| 27 | -1.102486e+03 | 2.245536e+03  | -4.676188e+02 |
| 28 | -7.078180e+02 | -1.375432e+03 | 6.172706e+02  |
| 29 | -1.001725e+03 | -3.943393e+02 | 1.102503e+03  |
| 30 | 8.427706e+02  | 6.100954e+02  | -1.029404e+03 |
| 31 | 4.711943e+03  | 7.576009e+03  | 2.262835e+03  |
| 32 | 3.054330e+03  | -3.937576e+03 | -2.307204e+02 |
| 33 | 1.415400e+03  | -3.836609e+03 | 8.431068e+02  |
| 34 | 5.039556e+03  | -1.410365e+03 | -1.230742e+03 |
| 35 | 3.589868e+02  | 7.546068e+02  | 1.239974e+02  |
| 36 | -6.367561e+03 | -3.297708e+03 | 4.836492e+03  |
| 37 | -1.096708e+03 | 1.057323e+02  | 2.986290e+01  |
| 38 | -2.647551e+03 | -3.129372e+03 | -2.842037e+03 |
| 39 | 9.557737e+03  | -1.265426e+03 | -2.541960e+03 |
| 40 | -9.599759e+02 | 7.184134e+02  | -1.345135e+02 |
| 41 | -2.245029e+03 | -5.446077e+02 | -3.978969e+02 |
| 42 | 5.026315e+02  | -1.524767e+03 | -1.530171e+03 |
| 43 | 2.731891e+02  | 6.286483e+02  | -9.661508e+01 |
| 44 | 2.105880e+03  | -3.006487e+03 | 2.095254e+02  |
| 45 | 6.688048e+02  | -3.047119e+02 | 8.598515e+02  |
| 46 | 2.414595e+03  | -2.972996e+03 | 3.226274e+03  |
| 47 | -3.473235e+02 | -4.297912e+02 | 1.000868e+03  |
| 48 | -3.362107e+03 | -7.554256e+03 | 5.566059e+02  |
| 49 | -1.857584e+03 | -1.577413e+03 | 1.749281e+03  |
| 50 | -9.117939e+03 | 6.062176e+03  | 1.180569e+03  |
| 51 | 8.557362e+02  | -1.566054e+03 | 4.365933e+01  |
| 52 | -7.691488e+03 | -2.236462e+03 | 6.243789e+03  |
| 53 | 3.806805e+03  | 8.029423e+03  | -1.346214e+03 |
| 54 | 6.229595e+03  | 5.036726e+02  | 3.243834e+03  |
| 55 | 8.218011e+02  | -8.723424e+02 | 6.152784e+02  |
| 56 | -1.152412e+03 | -2.650960e+03 | 3.025378e+03  |
| 57 | -1.999237e+03 | 5.317548e+03  | 6.735885e+03  |
| 58 | -1.831863e+03 | 4.082907e+03  | -4.395320e+03 |
| 59 | 1.084047e+03  | 1.250702e+03  | 9.937207e+02  |
| 60 | 3.713614e+03  | 1.217518e+02  | 3.826131e+03  |
| 61 | -1.830814e+02 | 2.117226e+01  | 1.162538e+03  |
| 62 | -1.008704e+04 | -1.231598e+03 | 3.540838e+03  |
| 63 | -9.876152e+02 | -3.825728e+02 | 2.611854e+02  |
| 64 | -3.344637e+03 | 2.065108e+03  | -2.131038e+03 |
| 65 | 7.861068e+03  | 2.614257e+03  | -6.889680e+03 |
| 66 | -6.561023e+02 | -1.406147e+03 | 2.203875e+01  |
| 67 | 4.578094e+03  | 7.161656e+03  | -5.768811e+03 |

trajectory 43  
atom VX

VY

VZ

|    |               |               |               |
|----|---------------|---------------|---------------|
| 1  | -2.571774e+02 | -2.609911e+02 | 2.817580e+01  |
| 2  | 5.674969e+02  | 2.463373e+02  | 1.525178e+03  |
| 3  | -3.932000e+02 | -1.538502e+03 | -2.178190e+03 |
| 4  | -8.201191e+02 | 8.246279e+02  | 5.595840e+02  |
| 5  | 2.419824e+03  | -9.938198e+02 | -1.121566e+03 |
| 6  | 4.212125e+03  | 2.959306e+03  | -6.109920e+03 |
| 7  | -4.166708e+03 | 2.268689e+03  | 4.645772e+03  |
| 8  | 9.316556e+02  | 2.995823e+03  | 3.152220e+03  |
| 9  | 1.461435e+02  | 3.243354e+02  | -5.492354e+02 |
| 10 | 7.153232e+02  | -4.230474e+02 | -6.200790e+01 |
| 11 | 1.133039e+03  | -2.041995e+03 | -1.531550e+03 |
| 12 | -1.721099e+03 | -1.157978e+03 | 4.122848e+03  |
| 13 | -1.053630e+03 | -5.202351e+02 | 8.187692e+03  |
| 14 | -1.289739e+03 | 2.507915e+01  | -3.918893e+02 |
| 15 | 3.363136e+02  | 1.781364e+03  | -7.454791e+01 |
| 16 | -4.071825e+01 | -1.694141e+03 | -6.243281e+02 |
| 17 | -2.601623e+01 | 2.370181e+01  | -8.134236e+01 |
| 18 | -8.871465e+02 | 2.377186e+02  | 2.837907e+02  |
| 19 | 1.701960e+03  | -1.143011e+03 | 2.782546e+02  |
| 20 | 1.447700e+03  | 9.712473e+01  | -7.819948e+02 |
| 21 | 8.351195e+02  | 3.601777e+00  | 3.537974e+01  |
| 22 | -4.311583e+02 | -2.506611e+02 | 1.057468e+03  |
| 23 | -3.396698e+02 | 9.799807e+02  | -3.394931e+02 |
| 24 | -2.206614e+02 | 3.509732e+02  | -1.560535e+02 |
| 25 | 8.233221e+02  | -1.072736e+03 | -6.655351e+02 |
| 26 | 2.856525e+01  | 4.839420e+01  | 5.141312e+02  |
| 27 | 8.861037e+02  | 1.328791e+03  | -3.380162e+02 |
| 28 | -1.375770e+03 | 4.345203e+02  | -5.649824e+02 |
| 29 | -2.358983e+02 | 1.492082e+03  | 6.192108e+02  |
| 30 | 2.977053e+02  | -9.681350e+02 | 8.110760e+02  |
| 31 | -1.016290e+04 | -8.660060e+02 | 1.207292e+03  |
| 32 | 2.709215e+03  | -4.405338e+03 | 4.433202e+03  |
| 33 | 2.764678e+03  | 2.803673e+03  | -1.291531e+03 |
| 34 | 5.935766e+03  | -6.450695e+03 | 2.667485e+03  |
| 35 | 1.334652e+03  | -8.026480e+02 | -4.555229e+02 |
| 36 | 9.839962e+02  | 5.403674e+03  | -5.148838e+01 |
| 37 | 7.877207e+02  | 7.710601e+02  | -2.952056e+02 |
| 38 | -7.921176e+03 | -3.806060e+03 | -1.654126e+03 |
| 39 | -2.655420e+03 | -2.926789e+02 | 3.066953e+03  |
| 40 | -7.475035e+01 | 5.143544e+02  | -1.261759e+02 |
| 41 | -9.734867e+02 | 2.941521e+02  | -5.023081e+02 |
| 42 | -1.030041e+03 | 1.192086e+02  | -1.385405e+03 |
| 43 | 1.606450e+03  | -2.097099e+02 | 7.838452e+02  |
| 44 | -1.023077e+04 | 3.232387e+03  | 1.885084e+03  |
| 45 | -1.015937e+03 | 1.643409e+02  | 9.740288e+02  |
| 46 | 1.708804e+03  | 1.296427e+03  | 3.334315e+03  |

|    |               |               |               |
|----|---------------|---------------|---------------|
| 47 | -1.044156e+03 | 6.832431e+02  | 1.541824e+01  |
| 48 | -2.126116e+03 | 4.025050e+03  | -8.008684e+02 |
| 49 | 4.605601e+03  | 5.254736e+03  | -5.993545e+03 |
| 50 | 2.497327e+03  | -4.568672e+03 | -1.479277e+03 |
| 51 | -1.760982e+03 | 5.912298e+02  | 4.524928e+02  |
| 52 | 2.110780e+03  | 4.048684e+03  | 7.207813e+03  |
| 53 | 8.722434e+03  | -4.033708e+03 | 5.713904e+03  |
| 54 | -3.469363e+03 | 4.606111e+02  | 7.063304e+02  |
| 55 | 2.992318e+02  | -5.139794e+02 | 6.731159e+02  |
| 56 | 7.590088e+03  | -3.746989e+03 | -4.433754e+03 |
| 57 | -4.466277e+03 | 5.065296e+03  | 4.953900e+03  |
| 58 | 1.456053e+03  | -3.644884e+03 | 1.029598e+04  |
| 59 | -3.068197e+02 | -1.327401e+02 | 6.803707e+01  |
| 60 | 3.094671e+03  | 2.913741e+03  | 2.140542e+03  |
| 61 | -4.076623e+03 | 6.447741e+03  | -6.375386e+03 |
| 62 | 4.218509e+03  | 5.840992e+03  | 4.404821e+03  |
| 63 | -5.539765e+02 | 8.473158e+02  | 6.186550e+02  |
| 64 | 5.495848e+02  | -4.082510e+03 | -5.392420e+03 |
| 65 | 2.588406e+03  | 4.289818e+03  | -2.325550e+03 |
| 66 | 4.907623e+03  | 2.152486e+03  | 6.407075e+03  |
| 67 | -6.724968e+03 | -8.865242e+03 | 2.800325e+03  |

trajectory 44

| atom | VX            | VY            | VZ            |
|------|---------------|---------------|---------------|
| 1    | 5.723710e+01  | 1.665269e+02  | 5.054070e+01  |
| 2    | 1.113114e+03  | -1.778793e+03 | -2.864600e+02 |
| 3    | 5.422909e+02  | 1.604083e+02  | -1.323410e+03 |
| 4    | -5.278026e+02 | 9.911236e+02  | 9.800708e+01  |
| 5    | 3.717109e+01  | -2.987175e+02 | 3.812488e+01  |
| 6    | 2.318250e+03  | -6.157638e+03 | 3.002775e+03  |
| 7    | -4.082743e+03 | 3.732727e+03  | 6.795401e+03  |
| 8    | -4.920429e+03 | -7.446766e+02 | -3.916237e+03 |
| 9    | -6.570564e+02 | -6.770705e+02 | 2.979545e+02  |
| 10   | -4.105363e+02 | -2.831142e+02 | 1.162363e+03  |
| 11   | 7.070292e+02  | 8.681519e+02  | -1.154199e+03 |
| 12   | -2.981547e+03 | 1.151964e+03  | 3.942275e+03  |
| 13   | -2.559427e+03 | -4.244382e+03 | 6.004319e+03  |
| 14   | 1.817970e+01  | -8.682953e+02 | 3.424378e+02  |
| 15   | 8.848587e+02  | -1.198090e+03 | 7.444336e+02  |
| 16   | -2.064492e+02 | -5.567503e+01 | -1.432414e+03 |
| 17   | -3.230686e+00 | 2.723013e+02  | -1.097817e+02 |
| 18   | -4.993488e+02 | 9.195260e+02  | -1.330307e+03 |
| 19   | 5.715598e+02  | -6.669372e+02 | -7.393628e+02 |
| 20   | 9.280293e+02  | 1.917909e+03  | 7.454877e+01  |

|    |               |               |               |
|----|---------------|---------------|---------------|
| 21 | 4.056535e+02  | -2.901957e+02 | -5.943881e+02 |
| 22 | -1.119068e+03 | -1.316143e+03 | 1.162661e+03  |
| 23 | 2.068141e+02  | -2.853637e+02 | -1.877105e+02 |
| 24 | 1.738512e+02  | 2.299890e+01  | -7.511742e+02 |
| 25 | -1.105746e+03 | 6.668281e+02  | 2.298848e+03  |
| 26 | 3.729699e+02  | -5.068445e+02 | -2.678648e+02 |
| 27 | 5.296966e+01  | 8.403889e+02  | -1.922729e+02 |
| 28 | -2.685909e+02 | 6.516924e+02  | 9.102703e+02  |
| 29 | -1.653468e+03 | 9.238913e+02  | 3.580090e+01  |
| 30 | 9.916315e+02  | -1.842287e+03 | 1.379573e+03  |
| 31 | -5.376460e+03 | -5.350963e+03 | 1.642702e+03  |
| 32 | 4.228563e+03  | 2.916945e+03  | -5.681440e+03 |
| 33 | 1.156899e+03  | -2.285690e+03 | -3.518366e+03 |
| 34 | 1.993764e+03  | -4.767180e+03 | -5.456045e+03 |
| 35 | -6.182815e+02 | -3.076419e+02 | -4.291839e+02 |
| 36 | 6.501714e+03  | 2.405236e+03  | -5.439129e+03 |
| 37 | 3.182709e+02  | 1.175446e+03  | 1.310689e+03  |
| 38 | -3.826293e+03 | 3.878621e+03  | -4.782709e+02 |
| 39 | 9.012833e+03  | 2.796283e+03  | -5.587222e+03 |
| 40 | 5.809017e+02  | 1.625697e+02  | 4.130825e+02  |
| 41 | 2.913978e+02  | -2.686671e+02 | -3.607195e+02 |
| 42 | -2.034074e+02 | -7.476826e+02 | -2.735664e+02 |
| 43 | 1.275736e+03  | -1.548183e+02 | -8.210458e+02 |
| 44 | -7.387072e+03 | -3.400037e+02 | 5.637337e+03  |
| 45 | -5.316201e+02 | -1.699953e+03 | 7.048047e+02  |
| 46 | -2.062920e+03 | 3.500131e+03  | -5.623352e+03 |
| 47 | -8.842566e+02 | 1.761875e+03  | -6.906294e+02 |
| 48 | 2.662970e+03  | -7.168913e+03 | 3.424700e+01  |
| 49 | -4.885391e+03 | -3.597272e+02 | 8.390711e+03  |
| 50 | 1.142171e+03  | -7.701534e+03 | -3.095668e+03 |
| 51 | -5.783928e+02 | -1.114638e+03 | 1.210572e+03  |
| 52 | 1.836104e+03  | -1.494830e+03 | -2.802197e+03 |
| 53 | 6.782401e+03  | -1.873603e+03 | -5.721163e+03 |
| 54 | -1.151988e+03 | 7.953060e+03  | -5.205261e+03 |
| 55 | 1.281445e+03  | -1.490328e+03 | 4.735420e+02  |
| 56 | 1.058460e+03  | -4.074264e+01 | 5.953910e+03  |
| 57 | -4.159799e+03 | 6.068415e+03  | 5.321779e+03  |
| 58 | -6.160865e+03 | 2.211226e+03  | 1.280008e+03  |
| 59 | -1.035439e+03 | -4.076597e+01 | -9.148613e+02 |
| 60 | 6.437183e+02  | -5.341310e+03 | 4.350423e+03  |
| 61 | 5.961283e+03  | -3.929711e+02 | 8.074007e+03  |
| 62 | -4.269533e+03 | 2.602285e+02  | 3.786300e+02  |
| 63 | 1.157685e+03  | 1.491475e+03  | 7.366830e+01  |
| 64 | -2.097898e+02 | -8.157689e+03 | -2.120563e+03 |
| 65 | -4.062127e+03 | 2.106863e+03  | -3.262135e+02 |
| 66 | -4.819079e+03 | 2.456338e+03  | 1.944365e+03  |



67 -7.980789e+03 5.300960e+03 1.429365e+03

trajectory 45

| atom | VX            | VY            | VZ            |
|------|---------------|---------------|---------------|
| 1    | 1.224490e+02  | -6.686363e+01 | -8.421709e+01 |
| 2    | 1.206645e+02  | 1.445500e+03  | -1.180479e+03 |
| 3    | 7.425689e+01  | 4.775030e+02  | -1.368208e+03 |
| 4    | 2.230262e+02  | 4.259123e+02  | 1.930822e+02  |
| 5    | -2.437150e+02 | -6.193004e+02 | -3.032579e+02 |
| 6    | -1.480428e+03 | -4.205187e+02 | 8.590502e+03  |
| 7    | 5.249883e+03  | -3.354454e+03 | -7.068995e+03 |
| 8    | -3.881983e+03 | -4.527987e+03 | 1.580249e+03  |
| 9    | -2.466226e+02 | 4.795991e+01  | 5.447850e+02  |
| 10   | -9.853466e+02 | 1.164956e+03  | 2.922118e+02  |
| 11   | 3.699719e+02  | -3.337887e+02 | 9.765800e+02  |
| 12   | -5.327141e+03 | 5.386316e+02  | 4.402381e+03  |
| 13   | -3.174286e+03 | -4.990761e+03 | 4.096783e+03  |
| 14   | 1.605520e+01  | 9.491342e+02  | 1.329510e+02  |
| 15   | -8.526777e+02 | -8.975676e+02 | 1.631855e+03  |
| 16   | 5.345622e+02  | 3.863835e+02  | -9.445594e+02 |
| 17   | -4.112216e+02 | 3.186842e+01  | -1.134697e+02 |
| 18   | -9.817787e+02 | -5.154742e+02 | 1.114601e+03  |
| 19   | 2.612679e+03  | 6.798856e+02  | -7.272501e+02 |
| 20   | -9.171344e+01 | -1.108476e+03 | -1.065258e+02 |
| 21   | 8.078740e+02  | -2.130717e+02 | -3.572717e+01 |
| 22   | 8.168407e+02  | -2.887031e+02 | 1.870158e+02  |
| 23   | 4.066603e+02  | -2.169300e+01 | -7.238227e+01 |
| 24   | -4.382739e+02 | 1.924259e+02  | -6.147222e+02 |
| 25   | 3.594245e+02  | 2.006811e+03  | 1.217348e+03  |
| 26   | -1.914645e+02 | -1.802091e+02 | -6.283423e+02 |
| 27   | 8.313672e+02  | 2.894730e+02  | 1.280138e+03  |
| 28   | 1.142560e+03  | -3.189441e+02 | -1.119312e+03 |
| 29   | -1.269370e+03 | 1.310829e+03  | 5.239392e+02  |
| 30   | 6.053163e+02  | -1.005872e+03 | 8.127646e+02  |
| 31   | -4.640927e+03 | -2.946069e+03 | 2.910947e+03  |
| 32   | -6.470301e+03 | 1.150031e+03  | -3.394778e+02 |
| 33   | 1.584258e+03  | -9.940296e+01 | 1.728900e+03  |
| 34   | -8.328900e+03 | -2.410343e+02 | -2.482708e+03 |
| 35   | 5.852007e+02  | -1.330723e+01 | 1.170890e+03  |
| 36   | 7.362745e+03  | 1.751855e+03  | -6.248824e+03 |
| 37   | -3.874905e+02 | 3.167287e+02  | -6.892008e+02 |
| 38   | 7.271154e+03  | 1.422132e+01  | 3.981890e+03  |
| 39   | 8.285389e+03  | 5.618228e+03  | -4.037500e+03 |
| 40   | 1.133617e+03  | -2.250354e+03 | -6.713990e+02 |

|    |               |               |               |
|----|---------------|---------------|---------------|
| 41 | 3.081317e+02  | 1.823920e+03  | -1.075899e+03 |
| 42 | -6.720168e+02 | 9.586251e+01  | 7.524772e+02  |
| 43 | -1.165290e+03 | 8.682303e+02  | -2.159296e+02 |
| 44 | 4.592274e+02  | -2.818651e+03 | 2.513783e+03  |
| 45 | -3.865688e+02 | -2.005928e+03 | -1.069622e+02 |
| 46 | -3.296858e+03 | -5.836853e+03 | 1.614295e+03  |
| 47 | 4.782212e+02  | 3.914452e+01  | 6.163097e+02  |
| 48 | -3.177909e+03 | 9.713714e+03  | -7.850143e+03 |
| 49 | 3.771018e+03  | 2.766822e+03  | 2.303649e+03  |
| 50 | -2.050574e+03 | 3.443113e+03  | -1.744627e+03 |
| 51 | -1.068618e+03 | -2.725973e+02 | -7.004021e+02 |
| 52 | 2.798540e+03  | -1.263376e+03 | -7.267391e+03 |
| 53 | 1.859291e+03  | -6.400062e+03 | 4.209181e+03  |
| 54 | 4.491346e+03  | -8.155513e+03 | -2.249051e+03 |
| 55 | 2.168490e+02  | -3.578380e+01 | 9.151014e+01  |
| 56 | -4.153558e+03 | -1.778755e+03 | -4.388815e+03 |
| 57 | 4.571109e+02  | 1.971848e+03  | -4.563373e+03 |
| 58 | 1.089400e+04  | 3.882033e+03  | 1.583400e+03  |
| 59 | -9.273652e+02 | -4.732859e+02 | 3.539114e+02  |
| 60 | 1.128694e+03  | -5.721786e+03 | 5.595876e+03  |
| 61 | 4.221585e+03  | -2.455514e+03 | 8.872433e+03  |
| 62 | -3.722055e+03 | 4.630619e+03  | -5.434432e+01 |
| 63 | -1.314882e+03 | -3.139725e+02 | 1.216457e+03  |
| 64 | 3.222542e+03  | 4.199446e+03  | -4.306586e+03 |
| 65 | 3.681163e+03  | 8.531475e+02  | -8.488383e+03 |
| 66 | 2.177455e+03  | -7.486086e+02 | -4.765553e+03 |
| 67 | 5.100694e+03  | -4.740682e+03 | 3.375991e+03  |

trajectory 46

| atom | VX            | VY            | VZ            |
|------|---------------|---------------|---------------|
| 1    | -2.113549e+02 | 1.649443e+02  | 3.225965e+02  |
| 2    | 7.488668e+02  | -1.313981e+02 | 7.493480e+02  |
| 3    | 5.926448e+00  | 1.900019e+03  | -1.304853e+03 |
| 4    | -5.311554e+02 | -1.873586e+02 | 1.304437e+02  |
| 5    | -9.507802e+01 | -9.762237e+02 | 1.063616e+03  |
| 6    | 4.972891e+02  | 9.383132e+03  | -7.815351e+03 |
| 7    | 3.834009e+03  | -3.561504e+03 | 7.683241e+02  |
| 8    | 3.688089e+02  | -2.193316e+03 | -2.477503e+03 |
| 9    | -2.513261e+02 | -3.974225e+02 | 1.652957e+02  |
| 10   | 1.871249e+03  | -1.159626e+03 | -9.615673e+02 |
| 11   | -8.965367e+02 | 1.087909e+03  | 1.897407e+03  |
| 12   | 3.238288e+03  | 5.338485e+02  | -8.515101e+03 |
| 13   | -2.809649e+03 | -3.569885e+03 | 2.068627e+03  |
| 14   | -1.499568e+03 | 3.295071e+02  | -1.015224e+02 |

|    |               |               |               |
|----|---------------|---------------|---------------|
| 15 | 4.630192e+02  | -2.036376e+02 | -1.033277e+03 |
| 16 | 1.254141e+03  | 9.518100e+02  | 4.631449e+02  |
| 17 | 1.557387e+02  | -7.240294e+01 | 2.108849e+02  |
| 18 | -3.823010e+02 | -6.603451e+02 | -2.848228e+02 |
| 19 | 3.167342e+02  | 5.718769e+02  | -4.891078e+02 |
| 20 | 4.115295e+02  | 1.369211e+02  | 1.827894e+01  |
| 21 | -3.686036e+02 | 5.063640e+02  | -2.047884e+03 |
| 22 | 6.663121e+02  | 4.517483e+02  | 1.573823e+03  |
| 23 | 1.142084e+02  | 7.729764e+01  | -2.967285e+02 |
| 24 | -2.473462e+02 | 7.430906e+01  | 1.079238e+03  |
| 25 | 3.865179e+02  | 6.102798e+02  | -2.016951e+03 |
| 26 | 1.123665e+03  | -1.393870e+03 | -5.895528e+02 |
| 27 | 8.935199e+02  | -1.923571e+02 | -7.345191e+02 |
| 28 | -2.663352e+02 | -6.580618e+02 | -6.057432e+02 |
| 29 | -1.324569e+03 | -4.793513e+02 | 8.205650e+02  |
| 30 | 1.511479e+03  | -7.298168e+02 | 1.689736e+03  |
| 31 | 1.318500e+03  | 1.532164e+03  | -6.942040e+03 |
| 32 | -7.439098e+01 | -3.819148e+03 | 2.098395e+03  |
| 33 | -1.467630e+03 | 2.321269e+03  | -2.515791e+03 |
| 34 | -3.190089e+03 | 4.753350e+03  | 1.243271e+03  |
| 35 | -1.610543e+02 | -1.764306e+03 | 4.093793e+02  |
| 36 | -1.270092e+04 | -3.388886e+03 | -2.207013e+03 |
| 37 | 7.378915e+02  | -4.719738e+02 | -5.192223e+02 |
| 38 | 1.163159e+02  | 1.513839e+03  | 3.971349e+03  |
| 39 | -6.729155e+03 | 7.217840e+03  | -2.122413e+02 |
| 40 | 3.935429e+00  | 5.945033e+02  | 3.586157e+02  |
| 41 | -1.474207e+02 | -6.438316e+02 | -1.229597e+02 |
| 42 | -2.160257e+03 | -6.775843e+02 | -5.458255e+02 |
| 43 | -1.523914e+02 | -2.244749e+02 | 1.979910e+02  |
| 44 | -5.220553e+03 | -4.462759e+03 | 2.265401e+02  |
| 45 | 2.571314e+03  | 6.554472e+02  | -1.165561e+03 |
| 46 | -7.338540e+03 | 4.381077e+03  | 4.740508e+03  |
| 47 | 2.309953e+02  | 6.845817e+02  | -6.890070e+02 |
| 48 | 2.974529e+02  | 6.071245e+01  | 1.686402e+03  |
| 49 | -6.897124e+03 | -9.283989e+02 | 6.528160e+03  |
| 50 | -2.683997e+03 | 2.922993e+03  | -3.887663e+03 |
| 51 | -1.106539e+03 | 3.812182e+01  | 1.221220e+03  |
| 52 | 5.200005e+03  | 6.193855e+03  | -3.851884e+03 |
| 53 | -3.725395e+03 | -4.031753e+03 | -8.558815e+02 |
| 54 | -1.545452e+03 | -2.516692e+02 | -3.530487e+03 |
| 55 | -5.969576e+02 | 4.759472e+02  | 1.161229e+03  |
| 56 | 4.671220e+03  | -4.437060e+02 | 3.591264e+02  |
| 57 | 2.301631e+02  | -5.469663e+03 | -7.982548e+03 |
| 58 | -2.675199e+02 | 7.501441e+03  | 2.331102e+03  |
| 59 | 1.036239e+03  | -5.522079e+01 | -1.012354e+03 |
| 60 | 8.273139e+02  | 4.032673e+02  | 2.561111e+03  |

|    |               |               |               |
|----|---------------|---------------|---------------|
| 61 | -1.029750e+03 | 4.306766e+03  | 2.597830e+03  |
| 62 | -9.971804e+03 | -2.845883e+03 | 3.725041e+03  |
| 63 | -1.895473e+02 | -1.267312e+03 | -1.432862e+02 |
| 64 | -1.011223e+03 | -1.995416e+03 | -6.191638e+02 |
| 65 | 7.438832e+03  | -3.009796e+00 | -7.490650e+03 |
| 66 | -3.738437e+03 | 8.329728e+03  | 1.147553e+03  |
| 67 | 2.252307e+03  | 5.616743e+03  | -5.973012e+03 |

trajectory 47

| atom | VX            | VY            | VZ            |
|------|---------------|---------------|---------------|
| 1    | -2.883019e+02 | 2.193423e+01  | -4.120537e+01 |
| 2    | 3.518537e+02  | 1.829775e+03  | -2.700272e+02 |
| 3    | -3.505222e+02 | -1.155516e+03 | -8.539981e+02 |
| 4    | 3.412504e+02  | 6.434646e+02  | 1.264615e+03  |
| 5    | 5.738168e+02  | 9.635855e+02  | 6.726808e+02  |
| 6    | 4.800586e+02  | -1.553629e+03 | -4.512443e+03 |
| 7    | 2.853242e+03  | -7.308914e+03 | 5.193925e+03  |
| 8    | -8.032614e+03 | -4.955575e+03 | -3.019335e+03 |
| 9    | -4.550983e+02 | 6.330011e+02  | 9.540785e+02  |
| 10   | 7.838735e+02  | -3.811521e+02 | 2.865429e+02  |
| 11   | 1.474198e+03  | -1.014717e+03 | -4.351404e+02 |
| 12   | -9.879703e+03 | -3.616868e+03 | -2.818051e+03 |
| 13   | -6.135845e+03 | -6.658410e+03 | 5.722837e+02  |
| 14   | 1.198882e+03  | 2.107114e+02  | -1.380904e+03 |
| 15   | -2.250619e+03 | -1.463594e+02 | 7.411652e+02  |
| 16   | -8.836046e+02 | -5.196658e+02 | 1.137769e+03  |
| 17   | 4.125867e+01  | 2.707852e+02  | -9.066861e+01 |
| 18   | 6.919697e+02  | 9.113534e+02  | -3.400381e+02 |
| 19   | 1.670936e+03  | -1.483325e+03 | -8.802572e+02 |
| 20   | -9.202968e+02 | 1.085701e+03  | -5.021187e+02 |
| 21   | 1.386366e+02  | -1.963378e+02 | 9.500227e+02  |
| 22   | -7.773947e+02 | -1.215251e+03 | 8.228872e+02  |
| 23   | -3.265406e+02 | -6.837293e+01 | 1.578864e+02  |
| 24   | -3.502592e+02 | 5.901408e+01  | -8.461067e+02 |
| 25   | 3.081724e+02  | -2.613147e+02 | -9.074869e+02 |
| 26   | 4.590375e+02  | 2.712706e+02  | 1.830629e+02  |
| 27   | 2.455827e+02  | 1.121495e+03  | -1.843565e+02 |
| 28   | -3.681524e+01 | -1.062085e+03 | 1.106709e+03  |
| 29   | -1.672137e+03 | -6.067478e+02 | 3.531942e+02  |
| 30   | -1.279989e+02 | -1.505824e+03 | -5.324352e+02 |
| 31   | 6.891929e+03  | 8.383770e+02  | -2.617963e+01 |
| 32   | -2.319746e+03 | 1.976316e+03  | 1.523114e+03  |
| 33   | 1.911698e+03  | -1.761525e+03 | -3.677346e+03 |
| 34   | 9.645362e+03  | 2.257301e+03  | 1.720249e+03  |

|    |               |               |               |
|----|---------------|---------------|---------------|
| 35 | -5.976473e+02 | 1.118170e+03  | -7.622592e+02 |
| 36 | 4.932690e+03  | 6.244620e+03  | -4.856411e+03 |
| 37 | 1.265489e+03  | -9.455545e+01 | 5.899715e+02  |
| 38 | -5.460582e+03 | 4.308832e+03  | -5.369067e+03 |
| 39 | -4.340848e+03 | 2.507275e+02  | 1.087154e+03  |
| 40 | 1.139072e+03  | 6.788392e+01  | -9.591790e+02 |
| 41 | 6.083897e+02  | -1.692121e+03 | -1.360868e+02 |
| 42 | -5.582702e+02 | 7.833254e+01  | -4.549340e+02 |
| 43 | 2.173481e+03  | 1.220293e+03  | 4.708230e+02  |
| 44 | 5.880054e+03  | 3.073755e+03  | -2.776295e+03 |
| 45 | -2.369374e+02 | -3.666939e+02 | 3.848274e+02  |
| 46 | 3.143848e+03  | -5.717639e+03 | -1.956264e+03 |
| 47 | -4.906078e+02 | -8.599309e+02 | 1.822438e+03  |
| 48 | -4.382817e+03 | 8.823708e+03  | 1.541788e+03  |
| 49 | 1.948992e+03  | 3.640581e+03  | -3.768127e+03 |
| 50 | -6.603451e+03 | -1.290094e+03 | 1.740082e+03  |
| 51 | 7.252177e+01  | 1.509458e+03  | 1.869340e+02  |
| 52 | 2.935206e+03  | 1.534939e+03  | -2.490224e+03 |
| 53 | -1.067272e+02 | -3.396732e+03 | 8.138872e+03  |
| 54 | -5.797524e+03 | 8.918880e+03  | -3.504188e+03 |
| 55 | 2.173724e+02  | -1.230789e+03 | 1.912438e+03  |
| 56 | 6.744872e+03  | 6.083894e+03  | -4.567484e+03 |
| 57 | 7.307736e+02  | 1.387563e+03  | -6.549073e+03 |
| 58 | -2.098757e+03 | -3.976336e+02 | -4.745236e+02 |
| 59 | -6.455195e+02 | -1.277269e+03 | -1.172492e+03 |
| 60 | 5.611585e+03  | -4.149314e+03 | 1.463571e+03  |
| 61 | 3.501223e+02  | -3.400991e+03 | -2.583296e+03 |
| 62 | -1.162135e+04 | -2.805555e+03 | 1.494981e+03  |
| 63 | -6.742486e+00 | -3.372629e+02 | -1.246668e+03 |
| 64 | -5.776334e+03 | 5.119205e+03  | 7.622836e+03  |
| 65 | 3.050380e+03  | -2.148082e+03 | -3.641327e+03 |
| 66 | 3.061527e+03  | 1.880136e+02  | 2.220524e+03  |
| 67 | 1.958055e+03  | -2.709850e+03 | 4.110625e+03  |

trajectory 48

| atom | VX            | VY            | VZ            |
|------|---------------|---------------|---------------|
| 1    | 4.160030e+01  | 3.884844e+01  | 3.277051e+02  |
| 2    | 2.825120e+01  | 1.597666e+03  | 3.242250e+01  |
| 3    | 7.373343e+02  | -8.964634e+02 | -1.652700e+03 |
| 4    | 1.339227e+02  | -1.185074e+02 | 7.731376e+01  |
| 5    | 2.152197e+01  | 4.590300e+02  | -1.690665e+01 |
| 6    | -2.947261e+03 | 4.419544e+03  | 2.646228e+03  |
| 7    | -9.140507e+02 | 8.262105e+03  | -3.098428e+03 |
| 8    | 6.515189e+03  | 3.508963e+03  | 9.138203e+03  |

|    |               |               |               |
|----|---------------|---------------|---------------|
| 9  | 4.198541e+02  | 2.377522e+02  | 6.397020e+02  |
| 10 | -4.843596e+02 | 2.229813e+03  | 8.704676e+02  |
| 11 | -3.911212e+02 | 1.577573e+01  | -5.330424e+02 |
| 12 | 1.248386e+03  | -8.423664e+03 | 4.157331e+03  |
| 13 | -3.879962e+03 | -7.519695e+03 | 1.046833e+03  |
| 14 | -8.761213e+01 | -3.147848e+02 | -8.169403e+02 |
| 15 | -8.024250e+02 | -1.686404e+02 | -1.342928e+02 |
| 16 | 3.406724e+02  | 3.532179e+02  | -1.076375e+03 |
| 17 | 1.394684e+02  | 3.722142e+01  | -1.799251e+02 |
| 18 | -3.228833e+02 | 4.142863e+02  | -5.098805e+02 |
| 19 | 8.434422e+02  | -1.739783e+03 | 1.893719e+03  |
| 20 | -5.247200e+02 | 1.085096e+02  | 2.814789e+02  |
| 21 | 2.385253e+02  | -8.519512e+01 | 3.629821e+02  |
| 22 | -1.037278e+03 | -2.689966e+03 | 6.872074e+02  |
| 23 | -7.775521e+02 | -5.225160e+02 | 1.058121e+02  |
| 24 | -1.007869e+03 | -9.283421e+01 | 6.654535e+02  |
| 25 | 7.995116e+02  | -5.041174e+02 | 2.090314e+02  |
| 26 | 5.114960e+02  | 8.862513e+02  | -1.913531e+03 |
| 27 | -8.449612e+02 | 2.175640e+03  | -2.597024e+02 |
| 28 | -3.220180e+02 | -9.482000e+02 | -7.799526e+02 |
| 29 | -1.327779e+03 | 1.188241e+01  | 1.134142e+03  |
| 30 | 1.863902e+03  | -1.336639e+03 | 5.863579e+02  |
| 31 | -3.763696e+03 | -4.925212e+02 | 3.039796e+03  |
| 32 | -9.150943e+02 | 7.251807e+03  | -4.851881e+03 |
| 33 | 4.852373e+02  | -2.938990e+03 | 7.663874e+01  |
| 34 | 3.134222e+03  | 1.457994e+03  | -6.029023e+03 |
| 35 | 6.465411e+02  | 5.171771e+02  | -1.006743e+03 |
| 36 | 1.089672e+03  | -3.184860e+03 | 1.989556e+03  |
| 37 | -1.594602e+03 | 3.130605e+02  | 1.969476e+02  |
| 38 | 7.640198e+03  | -2.728448e+03 | 3.904775e+03  |
| 39 | 5.395832e+03  | -1.408618e+02 | 5.934938e+02  |
| 40 | 8.635933e+01  | -6.716147e+02 | 9.819848e+01  |
| 41 | -9.639988e+02 | 4.803554e+02  | 1.353212e+03  |
| 42 | -1.150562e+02 | -7.709867e+02 | -8.193162e+02 |
| 43 | 2.535681e+02  | -1.298048e+03 | 6.854909e+02  |
| 44 | 3.761675e+03  | -6.054574e+03 | -1.624629e+03 |
| 45 | 8.449270e+02  | 1.650771e+03  | 1.010622e+02  |
| 46 | 3.373274e+03  | -1.850666e+03 | 4.729054e+03  |
| 47 | 8.927790e+02  | -6.742510e+00 | -1.123978e+03 |
| 48 | 2.607661e+03  | -9.120171e+03 | 1.092295e+03  |
| 49 | -6.168693e+03 | 7.395751e+02  | -2.977741e+03 |
| 50 | -9.901191e+03 | 1.607506e+02  | 1.988924e+03  |
| 51 | 1.168033e+03  | 1.478501e+02  | -1.564735e+03 |
| 52 | -6.999031e+03 | -6.004889e+03 | 1.287819e+03  |
| 53 | 2.884174e+03  | 6.731229e+03  | 7.633281e+02  |
| 54 | 1.895485e+03  | 1.407033e+03  | 5.198417e+03  |

|    |               |               |               |
|----|---------------|---------------|---------------|
| 55 | -6.131490e+02 | 2.015194e+02  | 6.625217e+02  |
| 56 | 7.348822e+03  | 7.983592e+03  | 3.117932e+03  |
| 57 | 5.380419e+03  | -4.214543e+03 | -6.466369e+03 |
| 58 | 3.435573e+03  | 8.096566e+02  | -1.826286e+03 |
| 59 | 2.794941e+02  | 1.050526e+03  | -1.050863e+03 |
| 60 | -1.085406e+03 | 1.762573e+03  | -1.432508e+03 |
| 61 | 2.873728e+02  | 1.461032e+03  | -6.747533e+02 |
| 62 | -1.124076e+04 | -2.166489e+03 | 2.637139e+02  |
| 63 | 1.266694e+02  | 6.809355e+02  | 1.605308e+03  |
| 64 | -2.965591e+03 | -6.639066e+03 | -8.461828e+03 |
| 65 | -5.625794e+03 | -1.747983e+03 | 7.955969e+02  |
| 66 | -1.180023e+03 | -2.745572e+03 | -3.867145e+03 |
| 67 | -1.428560e+03 | -7.472976e+03 | 1.063694e+03  |

trajectory 49

| atom | VX            | VY            | VZ            |
|------|---------------|---------------|---------------|
| 1    | -1.605616e+02 | -4.001245e+01 | -8.390261e+01 |
| 2    | -1.107412e+03 | -1.257727e+03 | 4.048761e+02  |
| 3    | 2.637243e+02  | 7.523934e+02  | 1.616375e+03  |
| 4    | 4.832140e+02  | -5.272248e+02 | -1.004702e+03 |
| 5    | 4.417529e+02  | 2.543877e+02  | 9.294187e+02  |
| 6    | 3.299403e+03  | -3.445024e+03 | -7.926006e+02 |
| 7    | -7.511804e+02 | -1.887123e+03 | -2.147483e+03 |
| 8    | -5.926536e+03 | 1.074186e+03  | -9.104386e+03 |
| 9    | -8.384676e+01 | 1.211351e+03  | -1.978703e+02 |
| 10   | 9.961537e+02  | 3.817753e+02  | -1.420018e+03 |
| 11   | -3.077019e+02 | 1.398107e+03  | 8.231449e+02  |
| 12   | -1.834278e+03 | -5.251038e+03 | 5.467000e+03  |
| 13   | 2.512110e+02  | 1.364445e+03  | -8.889464e+03 |
| 14   | -1.001326e+01 | -3.495533e+02 | -8.814241e+02 |
| 15   | -1.035318e+03 | -1.015607e+03 | 1.307336e+03  |
| 16   | 3.045194e+01  | 7.901982e+02  | 4.344001e+02  |
| 17   | -6.599166e+00 | 3.191958e+01  | 1.481886e+01  |
| 18   | -1.330197e+03 | -1.639738e+03 | 3.397106e+02  |
| 19   | 1.462999e+03  | 1.707487e+02  | -5.451017e+02 |
| 20   | 9.262875e+02  | -7.428698e+02 | 4.676791e+02  |
| 21   | 8.727460e+02  | 1.843014e+02  | -6.983805e+01 |
| 22   | 1.567269e+03  | -2.568612e+02 | 4.962145e+02  |
| 23   | -5.429086e+02 | -4.365326e+02 | -1.565065e+03 |
| 24   | -9.227568e+01 | 1.673073e+02  | 2.959688e+02  |
| 25   | 2.755092e+02  | -3.573951e+02 | 6.327936e+02  |
| 26   | -1.044567e+03 | -6.301294e+02 | -5.539865e+02 |
| 27   | 1.335114e+03  | 3.957888e+02  | 8.874313e+02  |
| 28   | -1.684934e+02 | -3.068689e+01 | -7.750554e+01 |

|    |               |               |               |
|----|---------------|---------------|---------------|
| 29 | -2.069149e+03 | 8.386928e+02  | -7.249002e+02 |
| 30 | 2.637305e+03  | 6.240828e+02  | -9.387818e+02 |
| 31 | -2.852488e+03 | 1.860358e+03  | 3.823681e+02  |
| 32 | 8.608608e+03  | 3.075267e+01  | -4.586049e+02 |
| 33 | -4.918305e+03 | -1.700839e+03 | 3.180182e+03  |
| 34 | 5.219641e+03  | -4.823502e+03 | -2.073467e+03 |
| 35 | 4.734119e+02  | 2.680337e+03  | -4.916688e+02 |
| 36 | -3.258248e+03 | -3.307863e+03 | 5.818144e+03  |
| 37 | -2.081170e+03 | -1.340433e+03 | -6.112630e+01 |
| 38 | 4.018181e+03  | -4.700142e+02 | 5.217452e+03  |
| 39 | 3.383013e+03  | 1.032428e+03  | -2.946104e+03 |
| 40 | 8.273518e+02  | 8.036315e+02  | 1.457226e+03  |
| 41 | -9.200867e+02 | -1.642383e+03 | 7.084858e+02  |
| 42 | -3.072246e+02 | 1.484636e+03  | -9.590678e+01 |
| 43 | 8.082691e+02  | 4.951119e+01  | -5.712764e+02 |
| 44 | -4.225939e+03 | -4.711883e+03 | 6.299474e+03  |
| 45 | 1.108456e+03  | 3.308740e+02  | -1.224565e+03 |
| 46 | 1.590295e+03  | -1.117055e+04 | 1.429260e+03  |
| 47 | 5.771208e+02  | -2.257299e+02 | 2.227155e+02  |
| 48 | -3.591840e+03 | 3.227845e+03  | -3.956076e+02 |
| 49 | -3.599697e+03 | 3.259318e+03  | 1.415200e+03  |
| 50 | -2.427137e+03 | -4.858067e+03 | 1.319502e+03  |
| 51 | -7.432310e+02 | 1.513728e+03  | -1.433722e+03 |
| 52 | 4.855940e+02  | 1.865457e+03  | 6.523823e+03  |
| 53 | -3.313539e+03 | -4.355167e+03 | -7.296314e+00 |
| 54 | 4.145292e+03  | -5.286359e+03 | 4.903133e+03  |
| 55 | 1.283993e+03  | 3.839018e+01  | -6.241956e+01 |
| 56 | -5.084733e+03 | -2.143842e+03 | 1.557259e+03  |
| 57 | -4.267473e+03 | -9.885513e+03 | -3.039276e+03 |
| 58 | -3.281737e+03 | 3.861817e+02  | -4.118078e+03 |
| 59 | -7.857667e+02 | -4.674234e+02 | 3.381470e+02  |
| 60 | 6.893085e+03  | 6.946975e+03  | -2.508741e+03 |
| 61 | -2.680268e+03 | 1.014935e+04  | 5.146328e+03  |
| 62 | -3.764852e+03 | 1.066385e+03  | 2.355460e+03  |
| 63 | -2.363408e+02 | 1.019534e+03  | -7.401782e+02 |
| 64 | -1.651461e+03 | -3.655919e+03 | 4.077164e+03  |
| 65 | -2.003106e+03 | -6.514374e+03 | 1.090297e+04  |
| 66 | -1.534978e+03 | 2.403423e+03  | -1.840036e+03 |
| 67 | 1.536555e+03  | -2.196983e+03 | 5.662761e+03  |

trajectory 50

| atom | VX            | VY            | VZ            |
|------|---------------|---------------|---------------|
| 1    | -5.474749e+00 | -2.546471e+02 | 5.031421e+01  |
| 2    | 1.432699e+03  | -5.674680e+02 | -1.096279e+02 |



|    |               |               |               |
|----|---------------|---------------|---------------|
| 3  | 7.703070e+02  | 6.688242e+02  | 7.704391e+02  |
| 4  | -6.666942e+02 | -1.157751e+03 | 1.333449e+02  |
| 5  | -7.047776e+01 | 8.041882e+02  | 9.436788e+02  |
| 6  | 4.467499e+03  | 4.511066e+03  | -7.399341e+03 |
| 7  | -2.386936e+03 | -7.242709e+02 | -3.420652e+03 |
| 8  | -3.885894e+03 | 3.229073e+02  | 3.832345e+03  |
| 9  | -6.837659e+02 | -7.268679e+02 | -1.026745e+03 |
| 10 | -6.846860e+02 | 2.265428e+02  | -5.439613e+02 |
| 11 | 6.514957e+02  | 1.412514e+03  | -2.098009e+03 |
| 12 | -4.213306e+03 | -4.050751e+03 | 5.477275e+02  |
| 13 | 2.035576e+03  | -9.555913e+03 | 4.103745e+03  |
| 14 | -9.561529e+02 | 1.308902e+02  | 4.755298e+02  |
| 15 | -1.515650e+03 | 3.938018e+02  | -5.082335e+02 |
| 16 | 1.401174e+03  | 4.482729e+02  | -8.739402e+01 |
| 17 | 9.657049e+01  | 2.145403e+02  | 6.597830e+01  |
| 18 | -1.082890e+02 | -3.245432e+02 | 2.499161e+02  |
| 19 | -8.811839e+02 | -1.513032e+03 | -1.596203e+02 |
| 20 | 3.167663e+02  | 7.401350e+02  | -9.274204e+02 |
| 21 | 1.442164e+03  | 5.551120e+02  | 4.221222e+02  |
| 22 | 1.795389e+02  | -5.842085e+01 | 1.434563e+03  |
| 23 | -1.288931e+03 | -2.507544e+02 | 1.055392e+02  |
| 24 | 4.543274e+02  | -1.439347e+01 | -8.548639e+02 |
| 25 | 8.903191e+02  | -1.519014e+02 | -1.326657e+02 |
| 26 | -1.463950e+02 | -3.377354e+02 | -9.255825e+02 |
| 27 | 2.559173e+03  | -5.791976e+02 | -1.383230e+01 |
| 28 | 1.274460e+02  | 9.801292e+02  | 2.951961e+02  |
| 29 | -1.388507e+03 | -1.254673e+03 | 1.611857e+02  |
| 30 | 1.416198e+03  | -1.891518e+02 | 5.472418e+02  |
| 31 | 4.061413e+03  | 4.323746e+03  | -1.333831e+03 |
| 32 | -2.235675e+03 | 2.821771e+03  | 2.911824e+02  |
| 33 | 1.959719e+03  | 3.683261e+03  | -3.767652e+03 |
| 34 | -5.871588e+03 | -1.478414e+03 | -1.962081e+03 |
| 35 | -7.171316e+02 | 6.354901e+00  | 2.524963e+02  |
| 36 | 6.055262e+03  | 4.583980e+03  | -1.842609e+03 |
| 37 | 6.810348e+02  | 8.932685e+02  | -1.449833e+02 |
| 38 | 7.515703e+03  | -1.815234e+03 | 5.331218e+03  |
| 39 | 2.199933e+03  | 6.095823e+01  | -3.651072e+03 |
| 40 | -1.676612e+03 | 4.122579e+02  | 6.888530e+02  |
| 41 | 1.331637e+02  | -8.948346e+02 | -1.486921e+03 |
| 42 | 1.922038e+03  | -7.069690e+02 | 7.983623e+02  |
| 43 | 5.551864e+02  | 4.878559e+02  | 3.679374e+02  |
| 44 | 3.159341e+03  | 1.404596e+03  | 4.120942e+02  |
| 45 | -2.413112e+03 | -5.480739e+01 | 2.529288e+03  |
| 46 | -2.603280e+03 | 3.146223e+03  | -2.049008e+03 |
| 47 | -8.217479e+02 | 2.180354e+03  | 4.112999e+01  |
| 48 | 2.295387e+02  | -5.163631e+03 | 1.352887e+03  |

|    |               |               |               |
|----|---------------|---------------|---------------|
| 49 | 3.008414e+03  | 2.936729e+03  | -6.985966e+03 |
| 50 | -6.491924e+03 | -1.871240e+03 | 4.246309e+03  |
| 51 | -6.786724e+02 | -4.157910e+00 | -1.861664e+02 |
| 52 | 3.016438e+03  | -6.055570e+03 | -1.680430e+03 |
| 53 | 9.582453e+03  | -9.273807e+00 | 4.887961e+03  |
| 54 | 2.623461e+03  | 1.333022e+03  | -9.720854e+02 |
| 55 | 4.303143e+01  | -5.259117e+02 | 1.706635e+03  |
| 56 | -2.787230e+02 | 1.290611e+03  | 6.116491e+02  |
| 57 | 2.262741e+03  | 7.160015e+03  | -6.988608e+03 |
| 58 | -9.416303e+03 | -4.642241e+03 | -3.488135e+02 |
| 59 | -1.508994e+03 | -2.077218e+03 | 1.655818e+02  |
| 60 | 6.165815e+03  | 5.652514e+03  | -1.603176e+02 |
| 61 | -2.673365e+02 | -1.779447e+03 | -1.912537e+03 |
| 62 | -4.168209e+03 | -5.659248e+02 | 2.823245e+03  |
| 63 | -1.915470e+03 | 1.319645e+03  | -3.586812e+02 |
| 64 | 9.953238e+03  | -4.066553e+03 | -1.149442e+03 |
| 65 | 4.519904e+03  | 3.808104e+02  | -2.360799e+03 |
| 66 | 7.510146e+03  | 7.138391e+02  | -4.627235e+03 |
| 67 | -9.415144e+03 | 2.021157e+03  | -8.098526e+03 |

## Dynamic IRC

| atom | VX            | VY            | VZ            |
|------|---------------|---------------|---------------|
| 1    | -1.593131e+01 | -1.073028e+01 | 2.146056e+00  |
| 2    | 1.698919e+02  | 2.613897e+02  | 2.808052e+02  |
| 3    | 1.577983e+01  | -3.370571e+01 | -1.631003e+01 |
| 4    | -5.074792e+00 | 2.168779e+01  | -2.524772e-02 |
| 5    | -5.731233e+00 | -3.433690e+00 | -2.095561e+00 |
| 6    | -1.320456e+01 | -8.836703e-01 | -1.196742e+01 |
| 7    | -1.671399e+01 | 1.083127e+01  | -1.575458e+01 |
| 8    | -7.296592e+00 | 6.387674e+00  | -1.020008e+01 |
| 9    | 6.311931e-01  | 1.747142e+01  | -8.735712e+00 |
| 10   | 1.964273e+01  | -5.849897e+01 | -3.759386e+01 |
| 11   | 2.512148e+01  | 1.673924e+01  | 1.739568e+01  |
| 12   | 5.842323e+01  | 2.964083e+01  | 5.039445e+01  |
| 13   | -1.213910e+02 | -2.453321e+02 | -2.726502e+02 |
| 14   | 3.458938e+00  | 7.523821e+00  | 9.392153e+00  |
| 15   | 3.282204e-01  | 2.827745e+00  | 3.256956e+00  |
| 16   | 3.231708e+00  | 4.292113e+00  | 1.489616e+00  |
| 17   | -1.287634e+00 | -1.464368e+00 | -1.792588e+00 |
| 18   | 1.186643e+00  | -2.322790e+00 | 7.574317e-01  |
| 19   | 1.716845e+00  | 1.817836e+00  | -1.514863e-01 |
| 20   | 1.009909e-01  | 2.752002e+00  | 1.002335e+01  |
| 21   | -2.474277e+00 | -1.843084e+00 | 9.089180e-01  |
| 22   | 6.109949e+00  | 9.089180e-01  | -1.767341e-01 |
| 23   | -1.994570e+00 | -1.085652e+00 | 2.777249e-01  |
| 24   | -8.836703e-01 | -5.806976e-01 | 1.994570e+00  |

|    |               |               |               |
|----|---------------|---------------|---------------|
| 25 | 6.109949e+00  | 8.407492e+00  | 1.262386e-01  |
| 26 | 5.049544e-01  | 3.105470e+00  | -3.181213e+00 |
| 27 | 1.772138e+02  | 5.307071e+01  | 1.476739e+02  |
| 28 | -7.420306e+01 | -3.375620e+01 | -3.736663e+00 |
| 29 | -1.893579e+00 | -2.777249e-01 | -5.463607e+01 |
| 30 | -7.028966e+01 | 4.703651e+01  | -7.884864e+01 |
| 31 | -7.508673e+01 | 6.407872e+01  | -7.407682e+01 |
| 32 | -9.028586e+01 | -3.706366e+01 | 1.845609e+01  |
| 33 | -6.326574e+02 | -1.306039e+03 | -1.502643e+03 |
| 34 | -5.080094e+02 | -4.867003e+02 | -1.027608e+03 |
| 35 | 7.826794e-01  | -3.352898e+01 | -1.656251e+01 |
| 36 | -1.363377e+01 | -2.497000e+01 | -1.631003e+01 |
| 37 | -4.562263e+01 | 7.271344e+00  | -9.341657e+00 |
| 38 | -1.709271e+01 | -2.385910e+01 | -1.593131e+01 |
| 39 | -1.989521e+01 | -1.666350e+01 | -1.009909e+00 |
| 40 | 6.311931e+00  | -8.155014e+00 | -8.811455e+00 |
| 41 | 9.922355e+00  | -9.846612e-01 | -3.837654e+00 |
| 42 | 8.937694e+00  | -2.474277e+00 | 7.448078e+00  |
| 43 | 8.382244e+00  | 9.594134e-01  | -2.247047e+00 |
| 44 | 1.161395e+00  | -9.493144e+00 | -1.742093e+01 |
| 45 | 9.240666e+00  | -6.564408e+00 | 2.297543e+00  |
| 46 | 4.544590e-01  | -7.422830e+00 | -2.449029e+00 |
| 47 | 1.310357e+01  | -4.645581e+00 | -3.307452e+00 |
| 48 | 6.564408e+00  | -3.054974e+00 | -4.367856e+00 |
| 49 | 6.892628e+00  | -7.094610e+00 | -4.393104e+00 |
| 50 | 1.163920e+01  | -6.892628e+00 | -5.504003e+00 |
| 51 | -4.645581e+00 | 1.211891e+00  | 3.484186e+00  |
| 52 | -5.125288e+00 | 4.670829e+00  | 5.276774e+00  |
| 53 | -8.180262e+00 | 2.095561e+00  | 9.998098e+00  |
| 54 | -5.377765e+00 | 1.287634e+00  | 3.686167e+00  |
| 55 | -1.716845e+00 | -3.458938e+00 | 1.211891e+00  |
| 56 | 1.615854e+00  | -5.781728e+00 | 3.004479e+00  |
| 57 | 6.564408e-01  | -1.338129e+00 | -5.049544e-02 |
| 58 | 3.433690e+00  | -1.146247e+01 | 1.489616e+00  |
| 59 | -9.341657e-01 | 1.262386e-01  | 8.079271e-01  |
| 60 | -5.302022e-01 | -4.292113e-01 | 1.363377e+00  |
| 61 | -3.282204e-01 | -9.089180e-01 | -5.049544e-02 |
| 62 | -5.806976e-01 | 1.439120e+00  | 1.666350e+00  |
| 63 | -9.341657e-01 | -1.161395e+00 | 7.574317e-02  |
| 64 | 5.049544e-01  | 2.524772e-02  | -1.161395e+00 |
| 65 | 1.262386e+00  | -9.594134e-01 | 1.716845e+00  |
| 66 | -1.136148e+00 | -5.302022e-01 | -1.110900e+00 |
| 67 | -2.353088e+01 | -3.029727e-01 | -5.425736e+01 |
